# Supplementary material for: PhenQE8, a Novel Ligand of the Human Telomeric Quadruplex
Source: MDPI journal article supplement (doi:10.3390/ijms22020749), 2021-01-13
Supplement: s1 [file s1]

# Supporting Materials

## PhenQE8, a novel ligand of the human telomeric quadruplex

Patricia B. Gratal, Julia G. Quero, Adrián Pérez-Redondo, Zoila Gándara,<sup>\*</sup> and Lourdes Gude<sup>\*</sup>

*Departamento de Química Orgánica y Química Inorgánica, Instituto de Investigación Química “Andrés M. del Río” (IQAR), Universidad de Alcalá, 28805-Alcalá de Henares (Madrid), Spain*

\*Correspondence: zoila.gandara@uah.es (Z. G.), lourdes.gude@uah.es (L. G.)

### Table of Contents

- 1.- Supplementary figures S1-S11: NMR and Mass Spectra Data
- 2.- Supplementary Table 1 and Supplementary Figure S12: x-Ray diffraction data
- 3.- Supplementary Figure S13. FRET assays (heating and cooling curves)
- 4.- Supplementary figures S14-S16: Additional CD experiments
- 5.- Supplementary Table 2: Oligonucleotide Sequences
- 6.- Supplementary Table 3: Extinction Coefficients for dialysis experiments

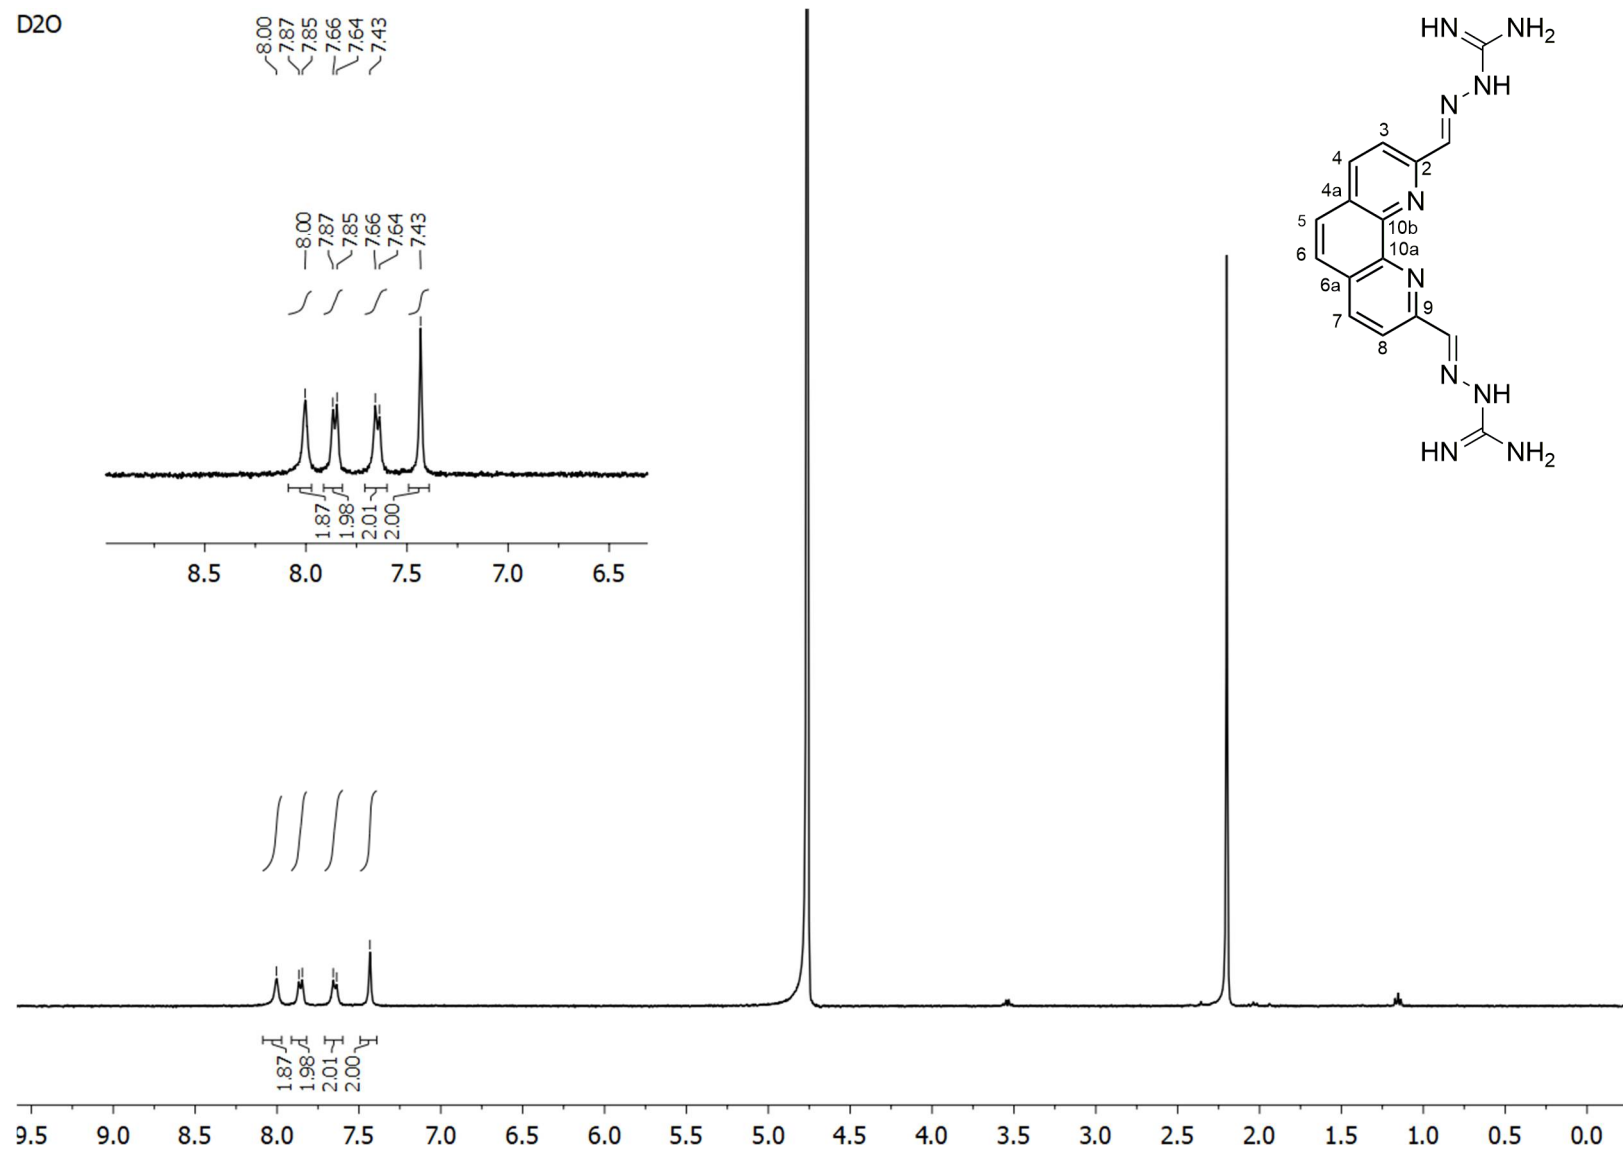

**Figure S1.**  $^1\text{H}$  NMR (400 MHz,  $\text{D}_2\text{O}$ ) of PhenQE8

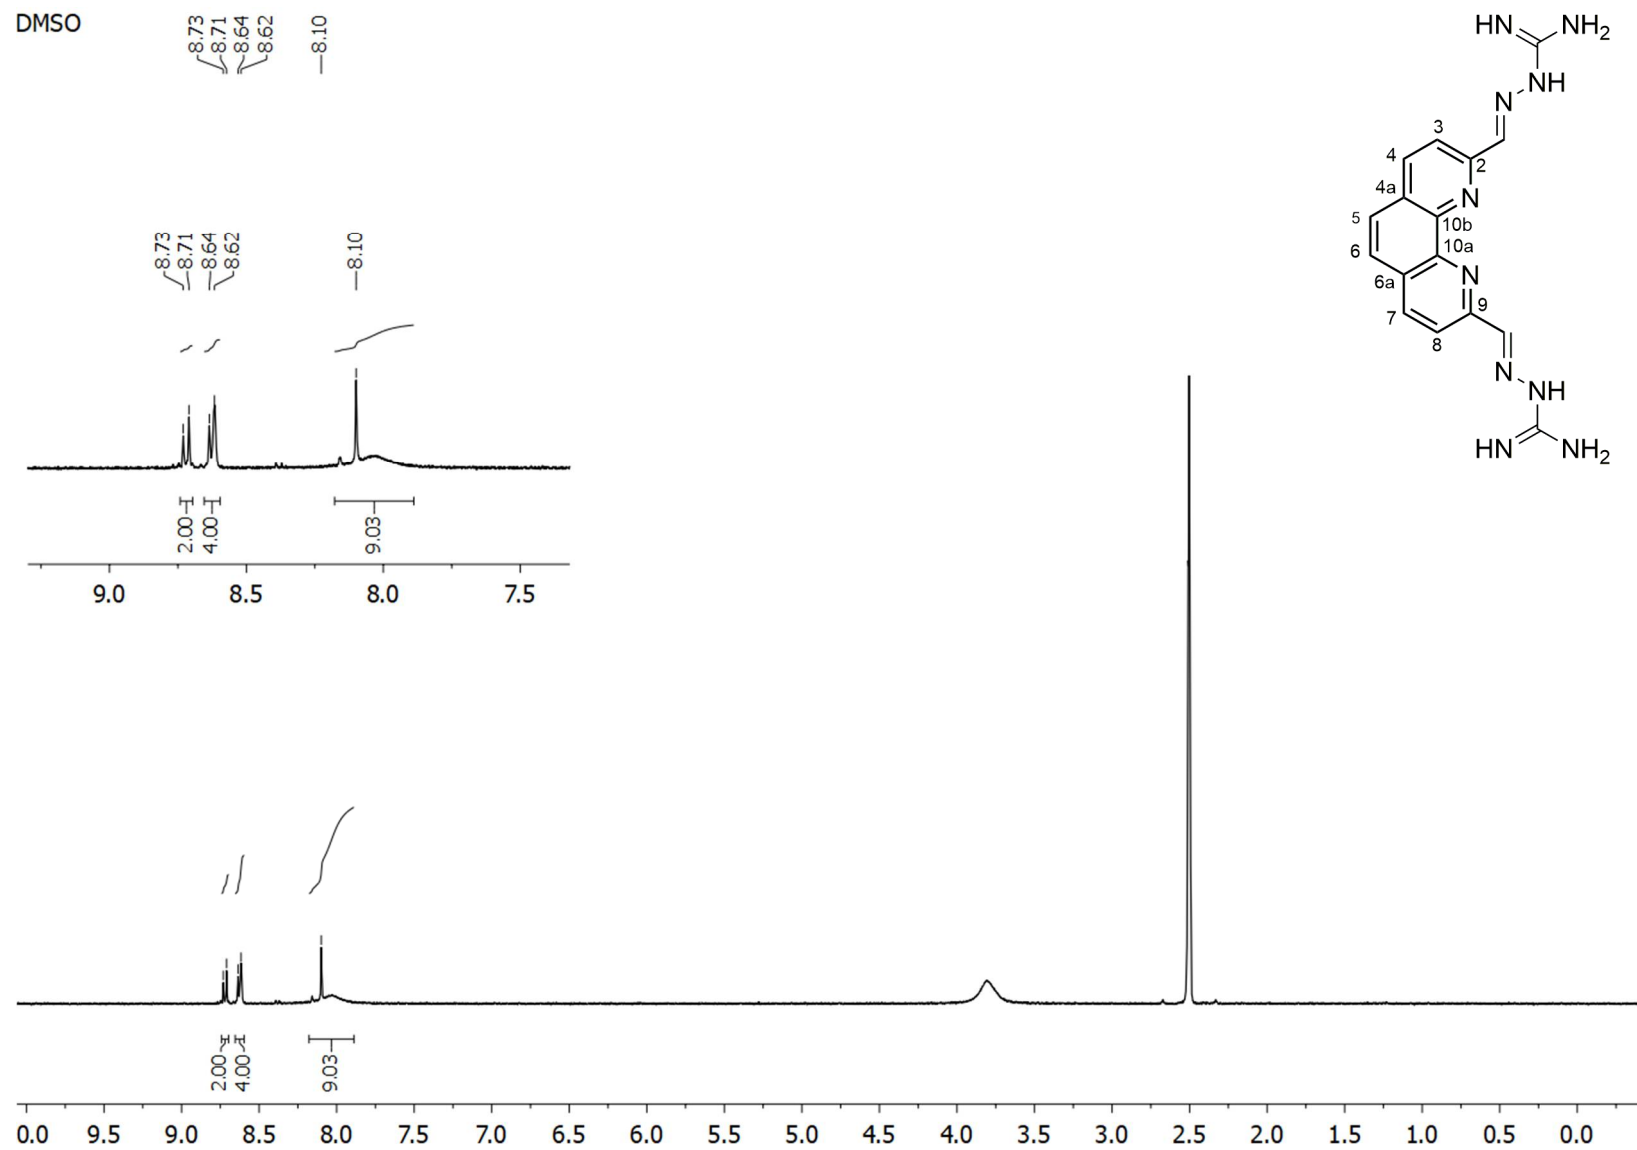

**Figure S2.**  $^1\text{H}$  NMR (400 MHz,  $\text{DMSO-d}_6$ ) of PhenQE8

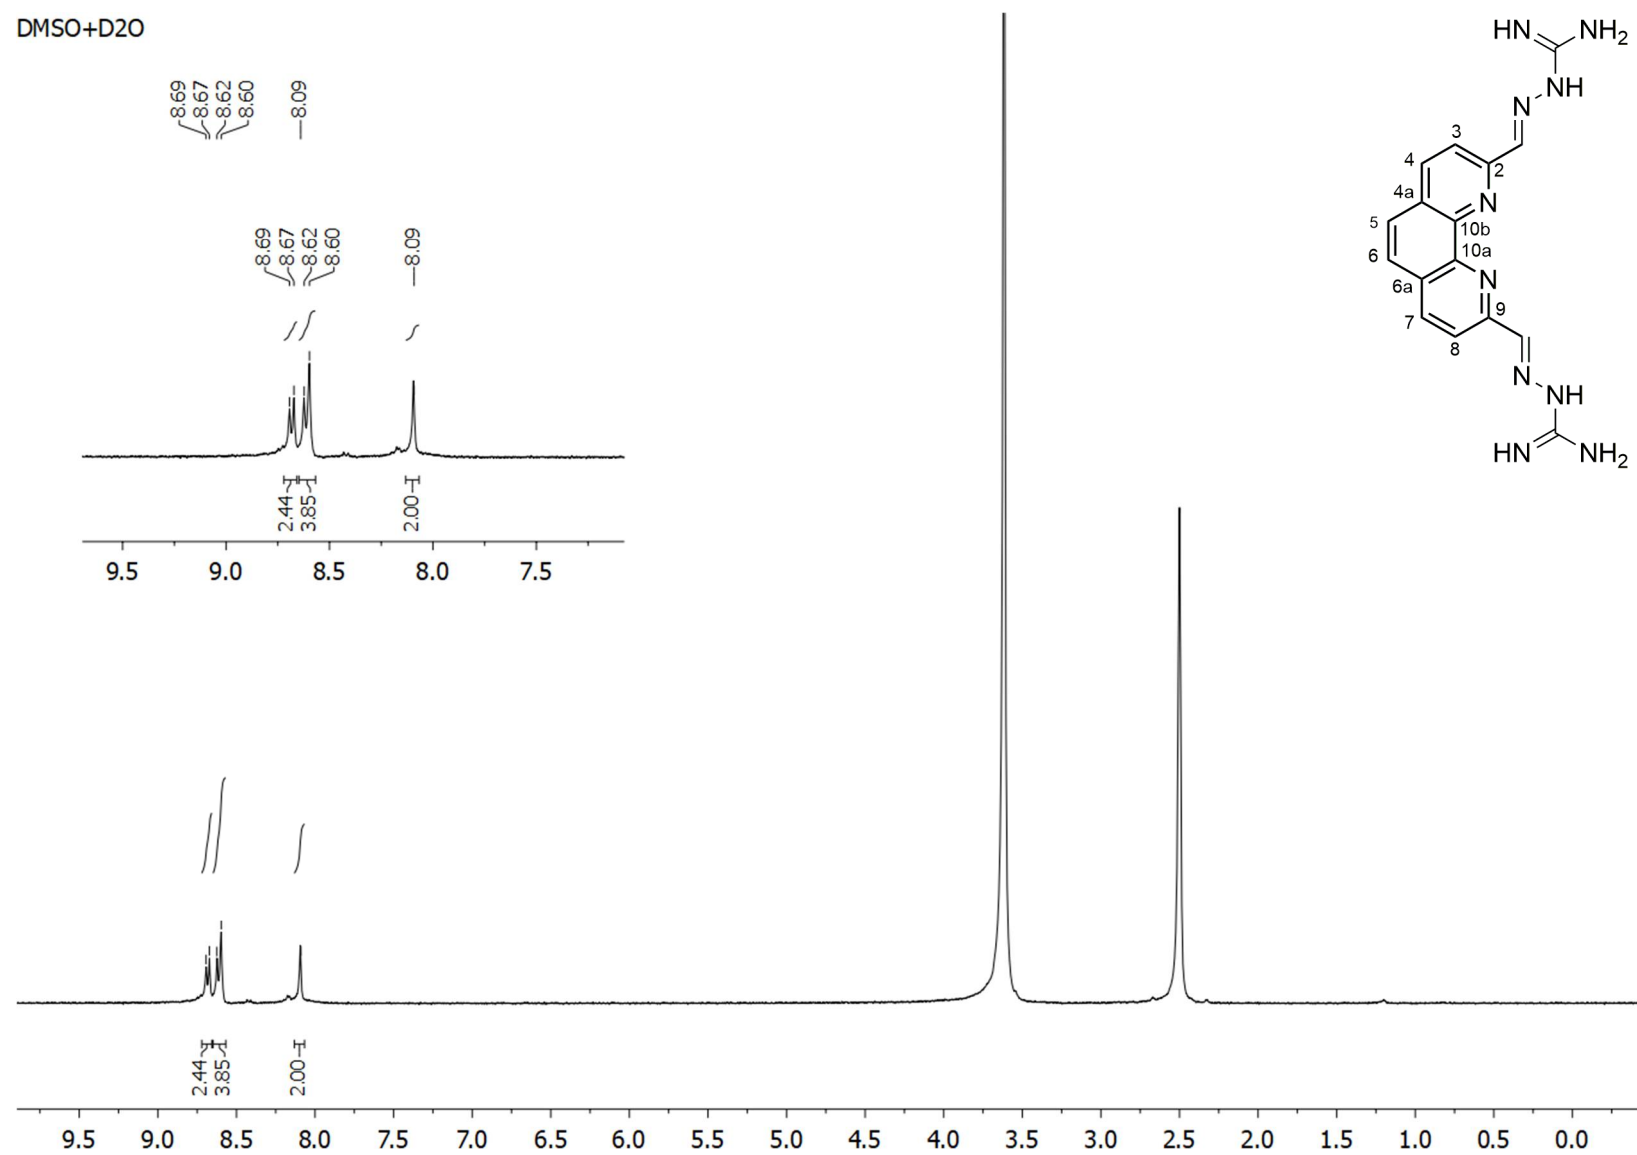

**Figure S3.**  $^1\text{H}$  NMR (400 MHz, DMSO- $d_6$ , 2.5%  $\text{D}_2\text{O}$ ) of PhenQE8

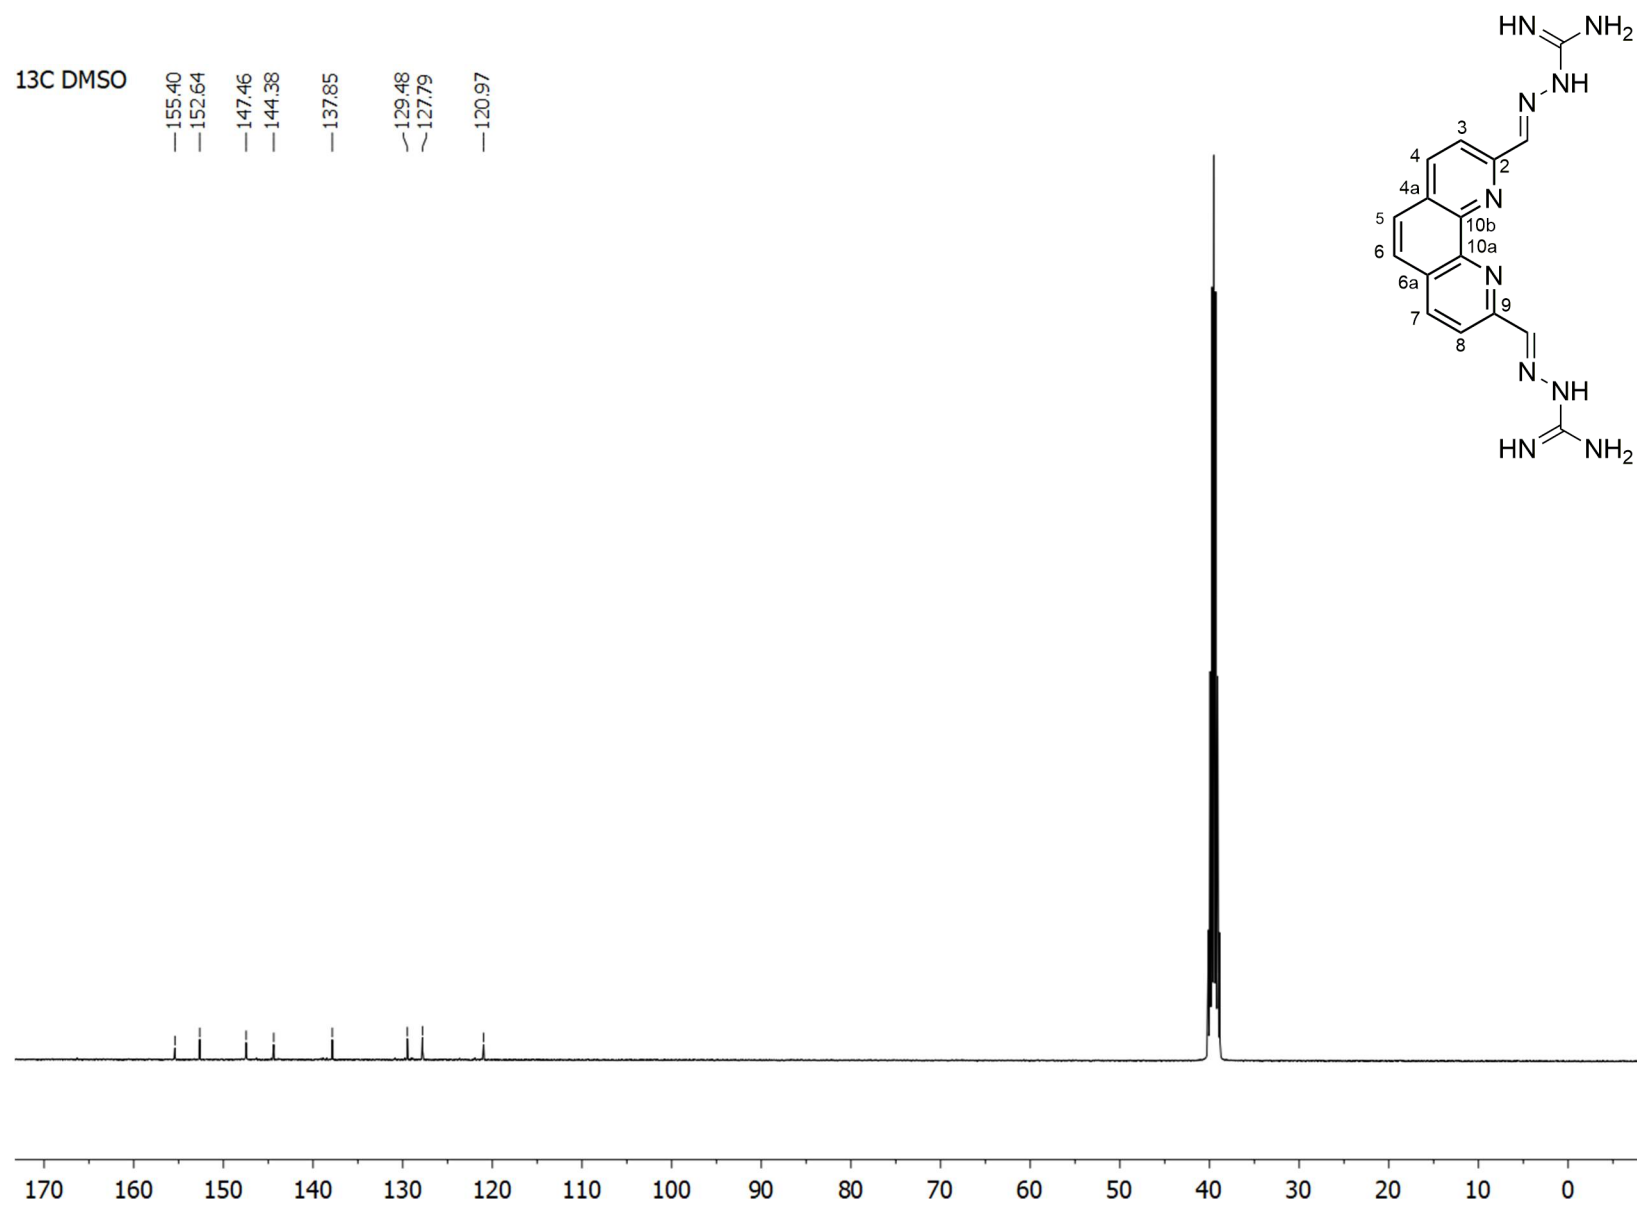

**Figure S4.** <sup>13</sup>C NMR (101 MHz, DMSO-d<sub>6</sub>, 2.5% D<sub>2</sub>O) of PhenQE8

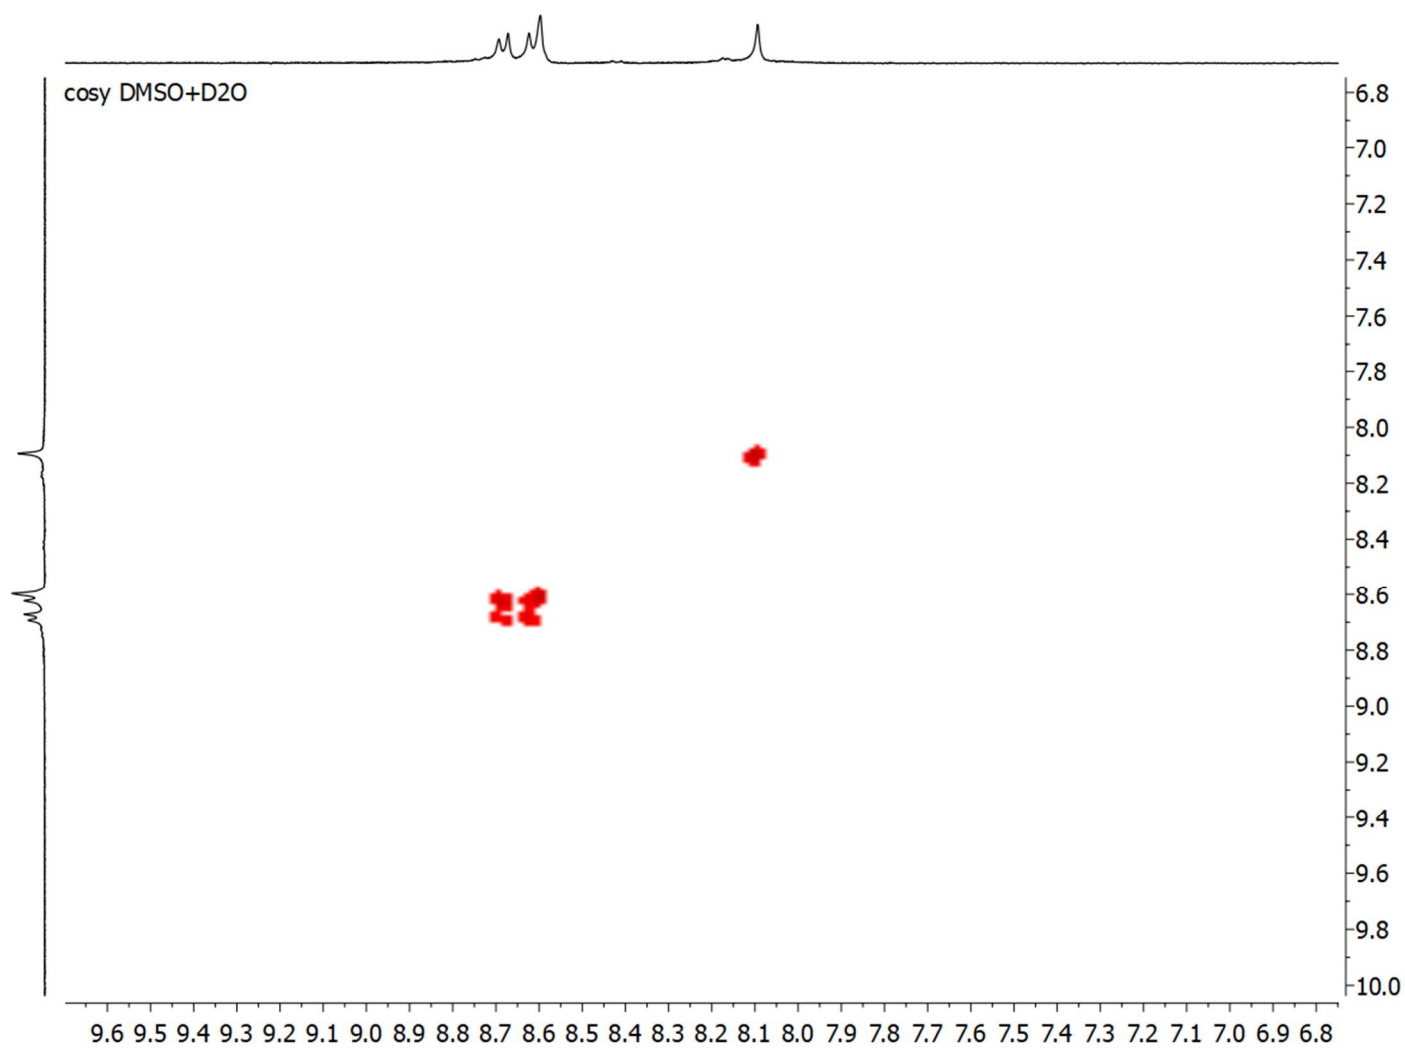

**Figure S5.**  $^1\text{H}$ - $^1\text{H}$ -COSY (400 MHz, DMSO- $\text{d}_6$ , 2.5%  $\text{D}_2\text{O}$ ) of PhenQE8

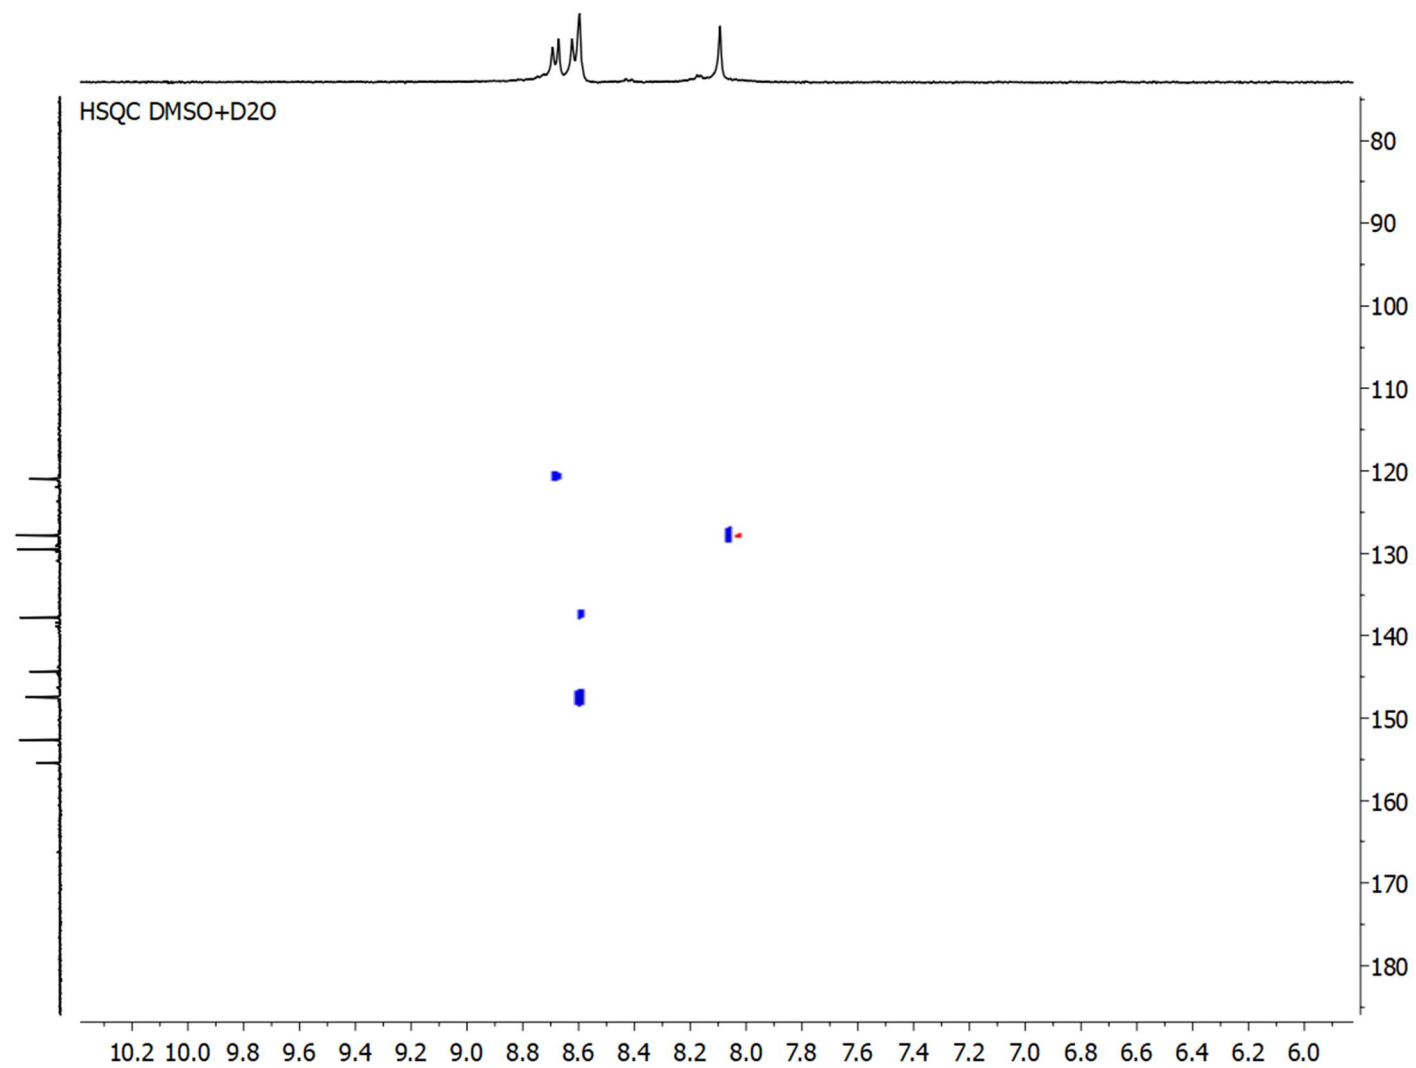

**Figure S6.**  $^1\text{H}$ - $^{13}\text{C}$ -HSQC (400 MHz, DMSO- $\text{d}_6$ , 2.5%  $\text{D}_2\text{O}$ ) of PhenQE8

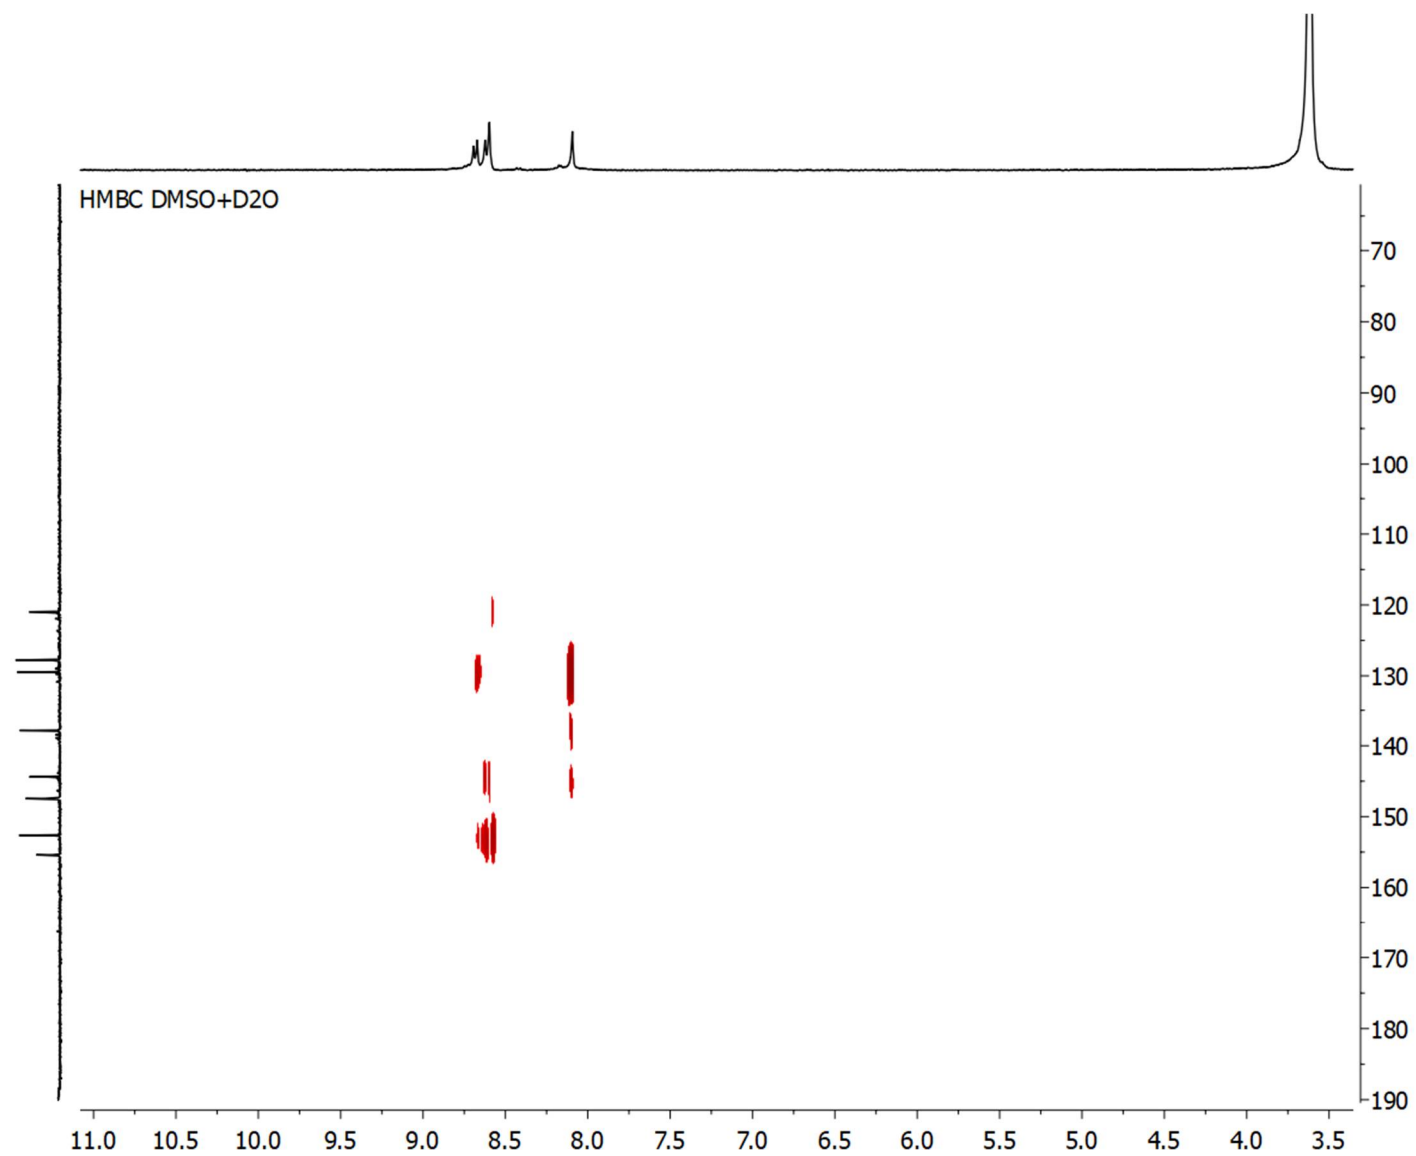

**Figure S7.**  $^1\text{H}$ - $^{13}\text{C}$ -HMBC (400 MHz,  $(\text{CD}_3)_2\text{SO}$ , 2.5%  $\text{D}_2\text{O}$ ) of PhenQE8



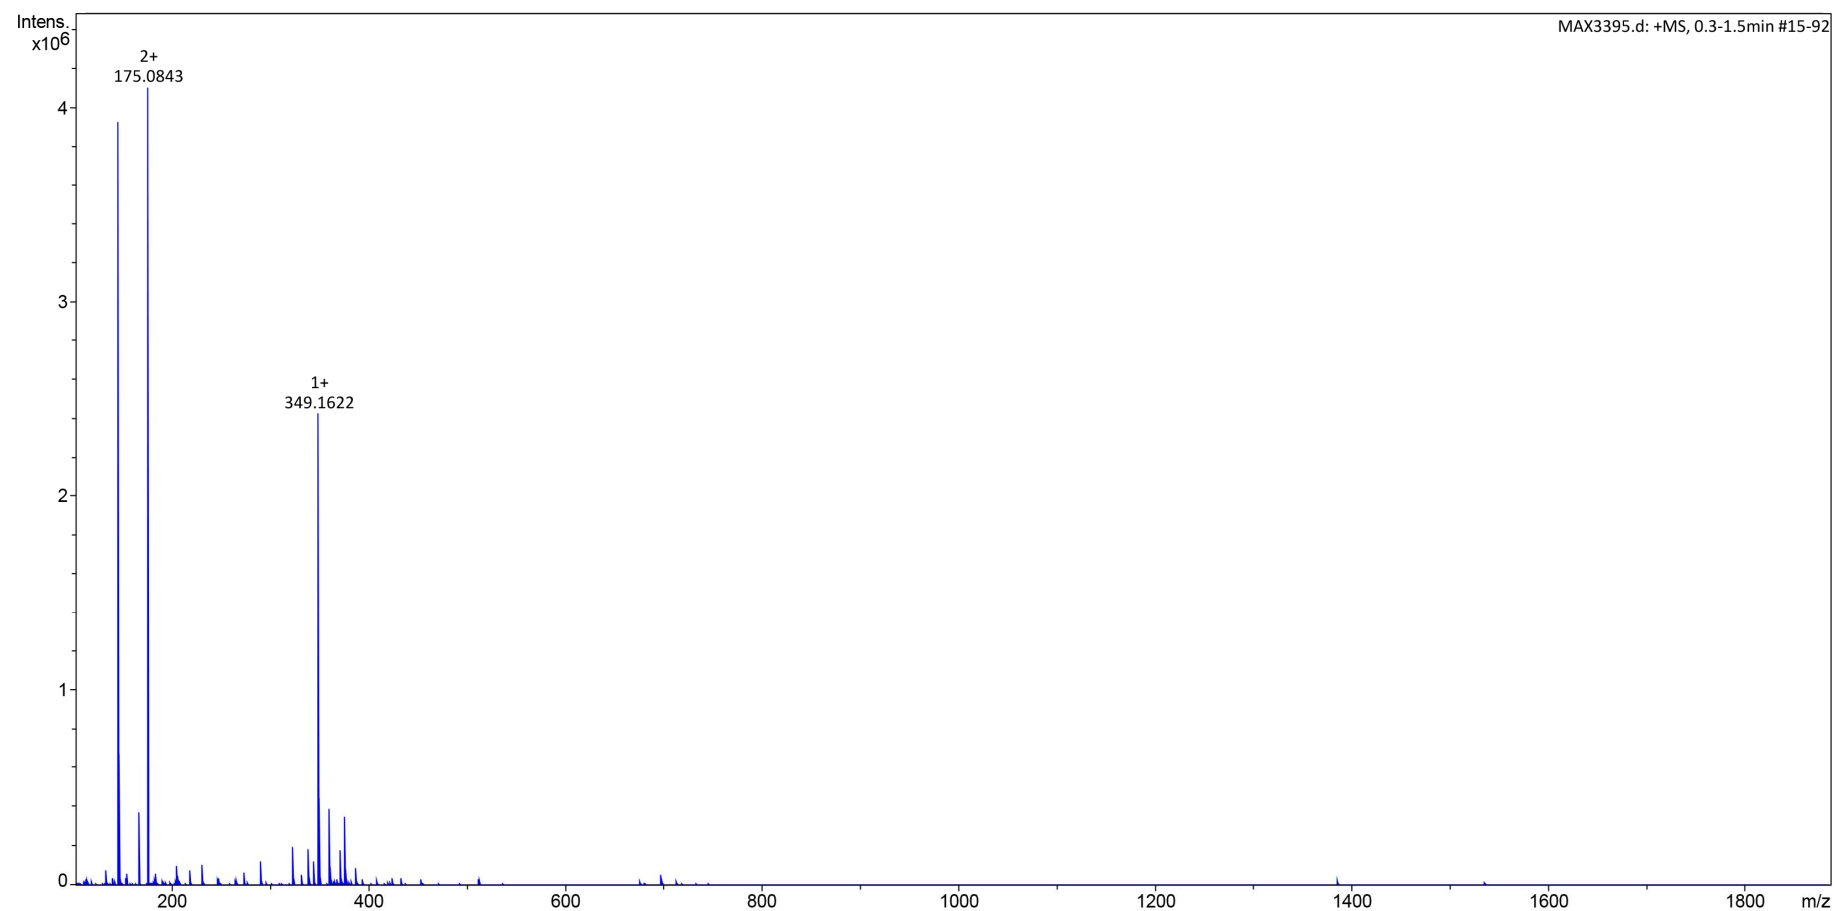

**Figure S8.** Full high-resolution electrospray ionization mass spectrum (ESI-HRMS) of PhenQE8 (MeOH, 1% formic acid)

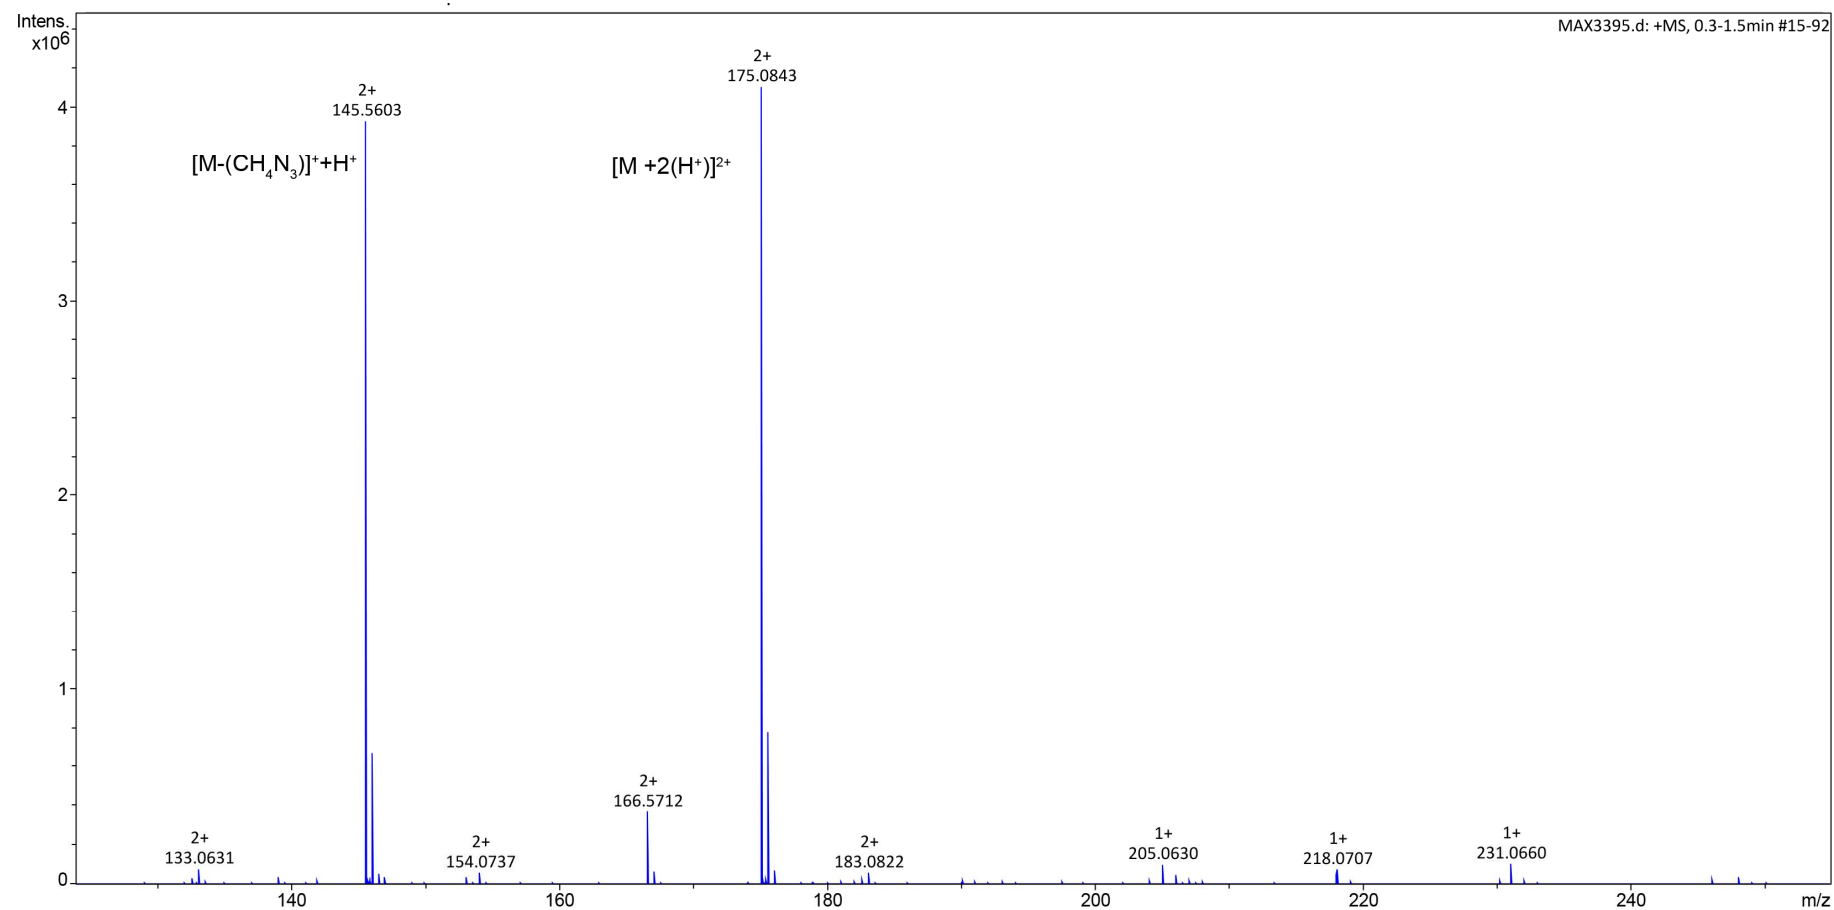

**Figure S9.** Zoomed view of high-resolution electrospray ionization mass spectrum (ESI-HRMS) of PhenQE8 (MeOH, 1% formic acid).

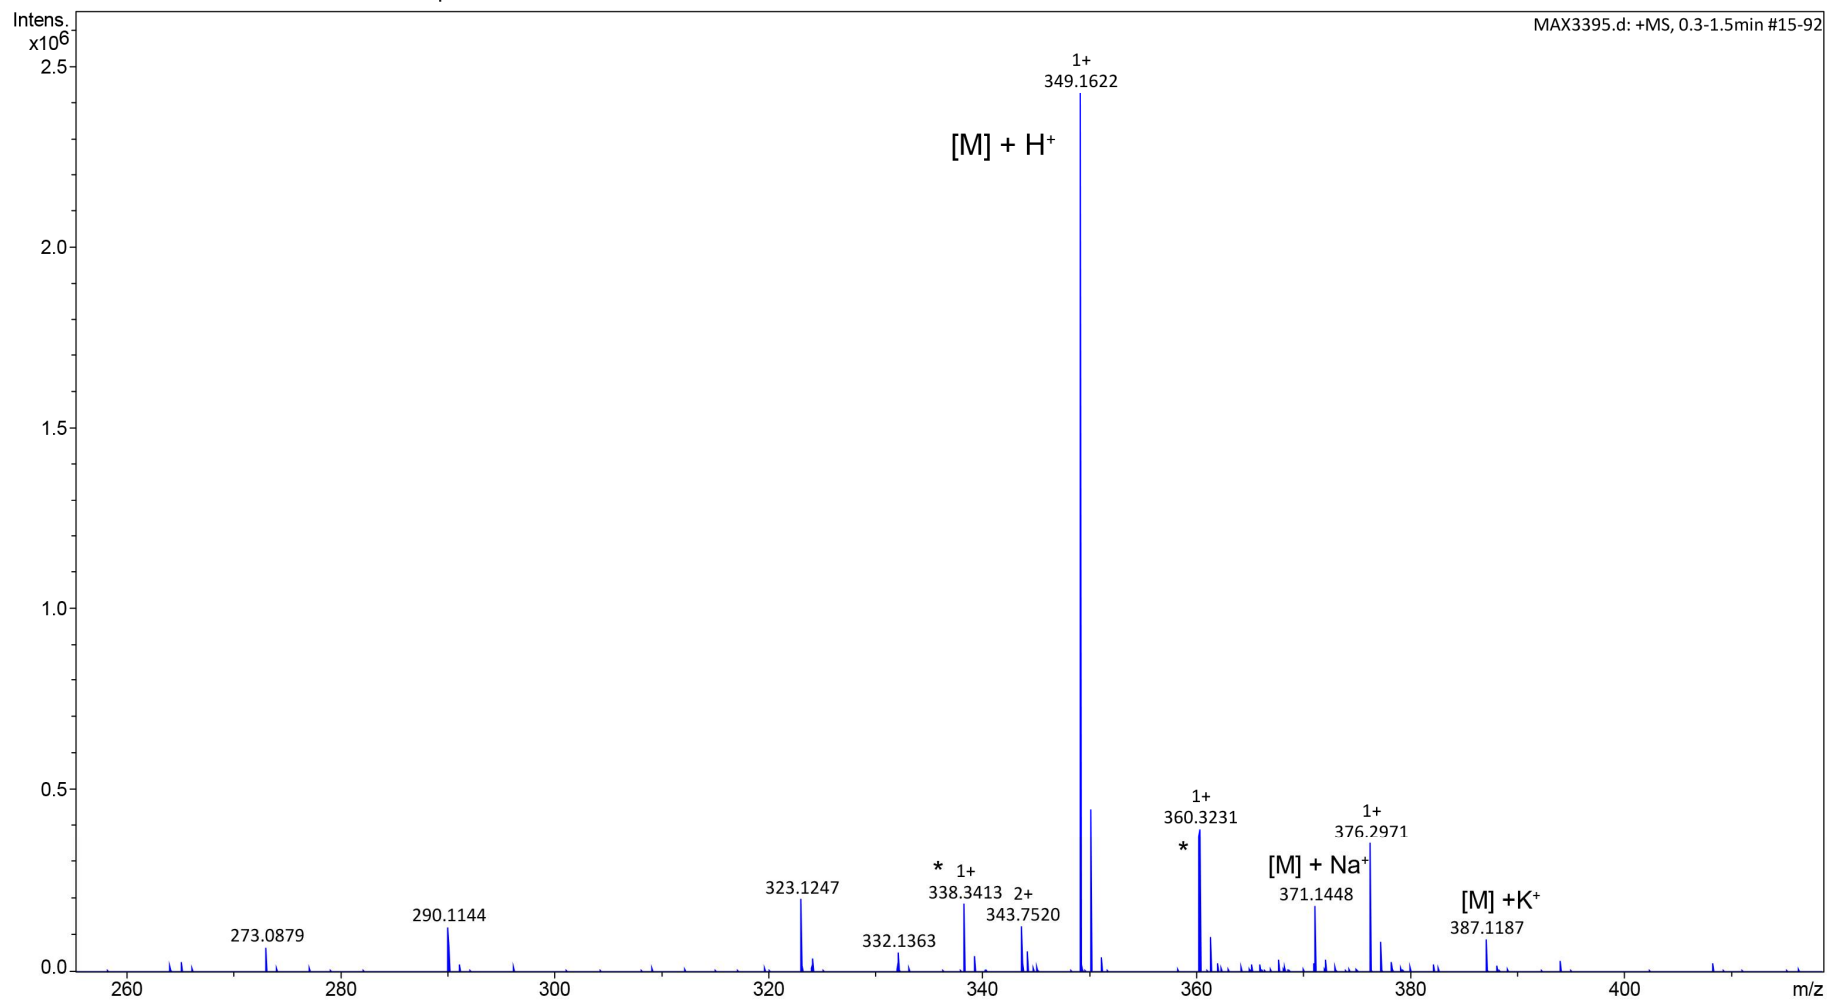

**Figure S10.** Zoomed view of high-resolution electrospray ionization mass spectrum (ESI-HRMS) of PhenQE8 (MeOH, 1% formic acid)

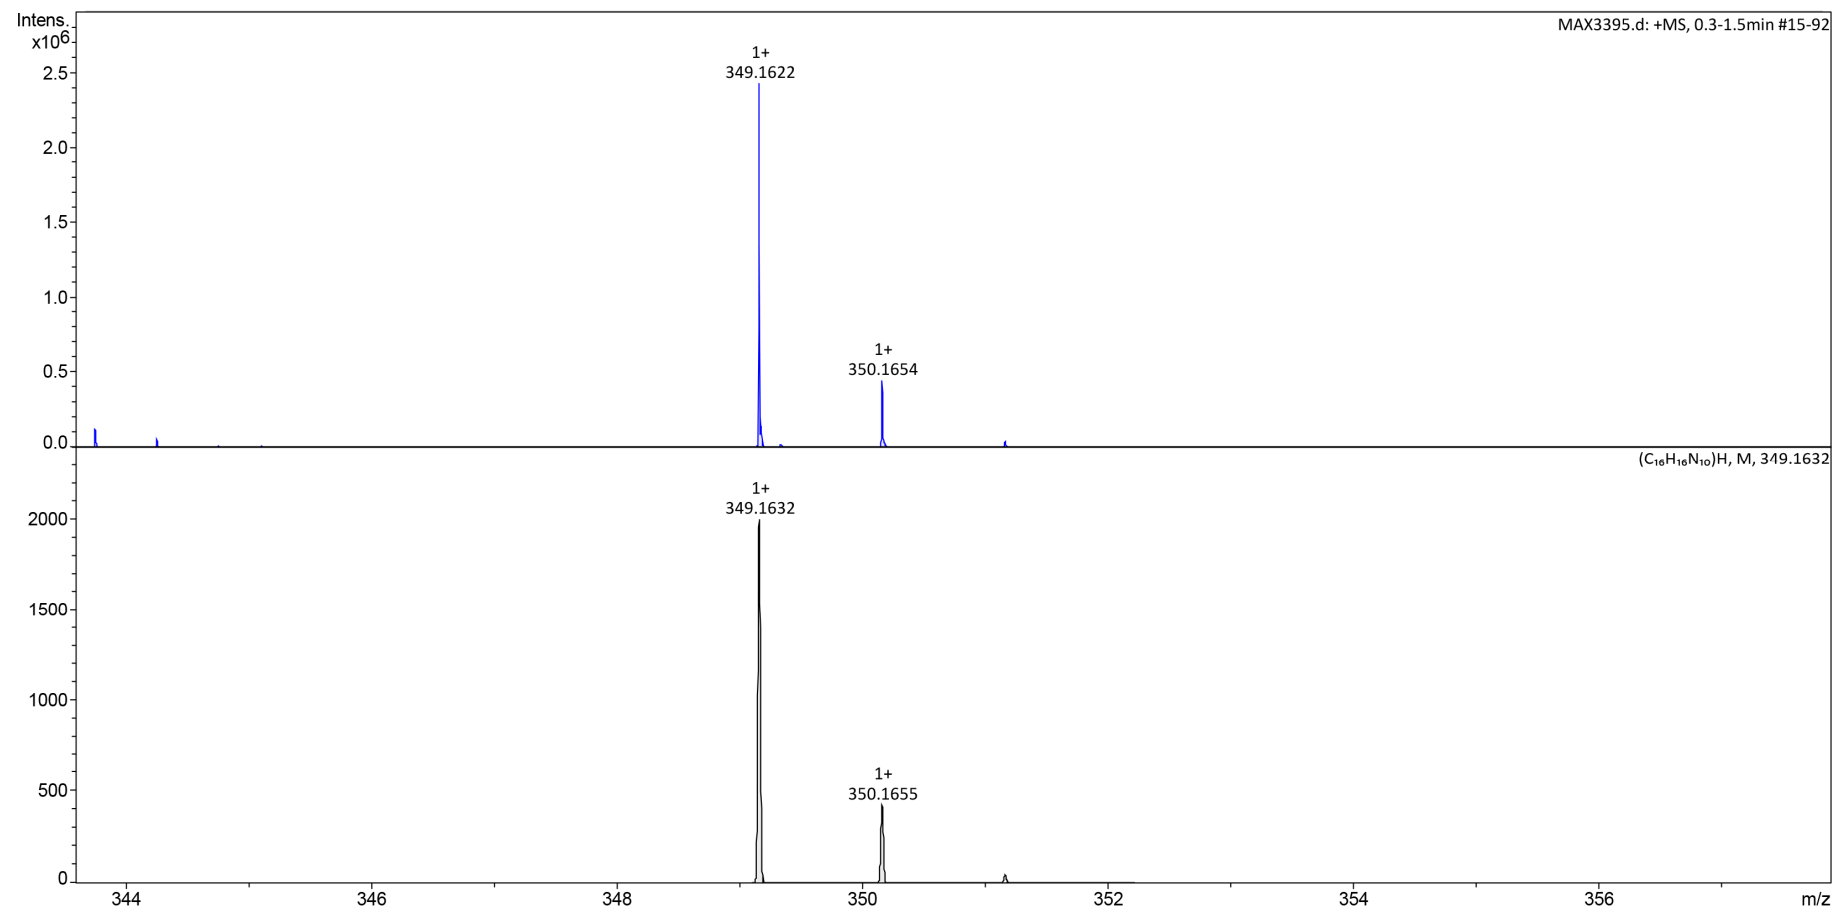

**Figure S11.** Zoomed view of high-resolution electrospray ionization mass spectrum (ESI-HRMS) of PhenQE8 (MeOH, 1% formic acid). Top panel represents the experimental isotopic distribution of protonated molecular ion. Bottom panel represents calculated isotopic distribution for  $[M] + H^+$ .

**Table S1.** Experimental data for the X-ray diffraction study on compound **PhenQE8**

|                                              |                                                 |
|----------------------------------------------|-------------------------------------------------|
| formula                                      | C <sub>16</sub> H <sub>16</sub> N <sub>10</sub> |
| CCDC <sup>a</sup> code                       | 2041050                                         |
| $M_r$                                        | 348.39                                          |
| $T$ [K]                                      | 200(2)                                          |
| $\lambda$ [Å]                                | 0.71073                                         |
| crystal system                               | monoclinic                                      |
| space group                                  | $C2$                                            |
| $a$ [Å]                                      | 33.889(4)                                       |
| $b$ [Å]; $\beta$ (°)                         | 11.308(1); 91.50(1)                             |
| $c$ [Å]                                      | 9.965(1)                                        |
| $V$ [Å <sup>3</sup> ]                        | 3817.3(6)                                       |
| $Z$                                          | 6                                               |
| $\rho_{\text{calcd}}$ [g cm <sup>-3</sup> ]  | 0.909                                           |
| $\mu_{\text{MoK}\alpha}$ [mm <sup>-1</sup> ] | 0.061                                           |
| $F(000)$                                     | 1092                                            |
| crystal size [mm <sup>3</sup> ]              | $0.46 \times 0.22 \times 0.08$                  |
| $\theta$ range (deg)                         | 3.20 to 27.50                                   |
| index ranges                                 | -44 to 44<br>-14 to 14<br>-12 to 12             |
| reflns collected                             | 42745                                           |
| unique data                                  | 8673 [R(int) = 0.125]                           |
| obsd data [ $I > 2\sigma(I)$ ]               | 6837                                            |
| GOF on $F^2$                                 | 1.068                                           |
| final $R^b$ indices [ $I > 2\sigma(I)$ ]     | R1 = 0.081<br>wR2 = 0.195                       |
| $R^b$ indices (all data)                     | R1 = 0.103<br>wR2 = 0.206                       |
| largest diff. peak/hole [e Å <sup>-3</sup> ] | 0.464 and -0.348                                |

<sup>a</sup> Cambridge Crystallographic Data Centre. <sup>b</sup>  $R1 = \sum ||F_o| - |F_c|| / \sum |F_o|$ ;  $wR2 = \{[\sum w(F_o^2 - F_c^2)^2] / [\sum w(F_o^2)^2]\}^{1/2}$

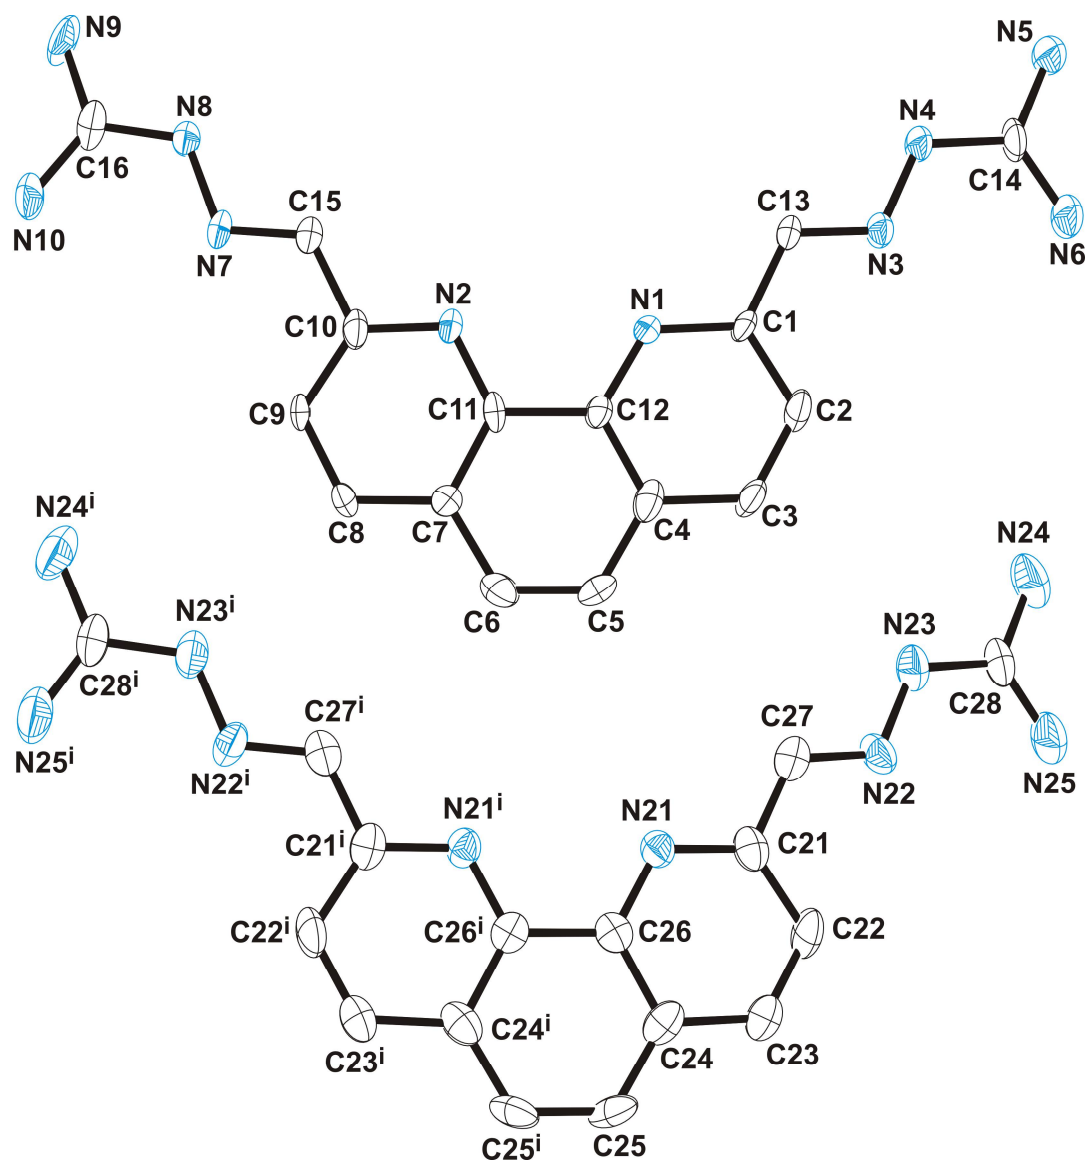

**Figure S12.** X-ray structure and numbering scheme for both independent molecules of PhenQE8. Thermal ellipsoids are drawn at the 50% probability level. Symmetry code: (i)  $1 - x, y, -z$ .

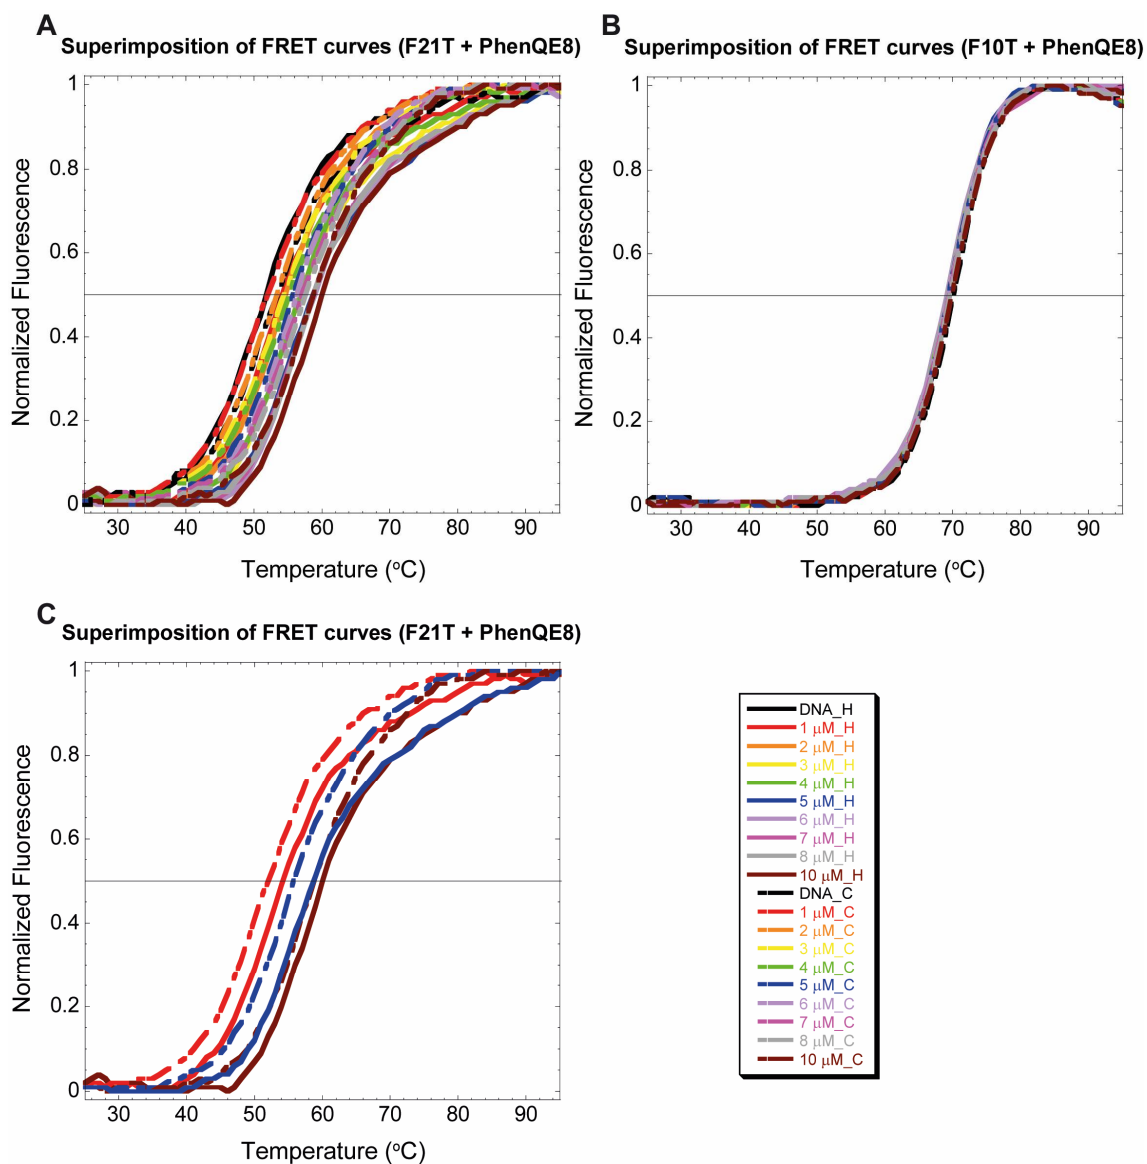

**Figure S13.** Superimposition of FRET heating (H) curves and cooling (C) curves corresponding to the processes of unfolding and folding of DNA, respectively. A) With Tel22 and PhenQE8 at a concentration range between 1-10  $\mu$ M, in the buffer system 10 mM lithium cacodylate, 90 mM LiCl, 10 mM KCl. B) with duplex DNA F10T at a concentration range between 1-10  $\mu$ M. C) With Tel22 and PhenQE8 at three separate concentration points of the titration (1  $\mu$ M, red; 5  $\mu$ M, blue; 10  $\mu$ M, brown). Solid lines represent the heating curves (H), whereas dashed lines correspond to cooling curves (C).

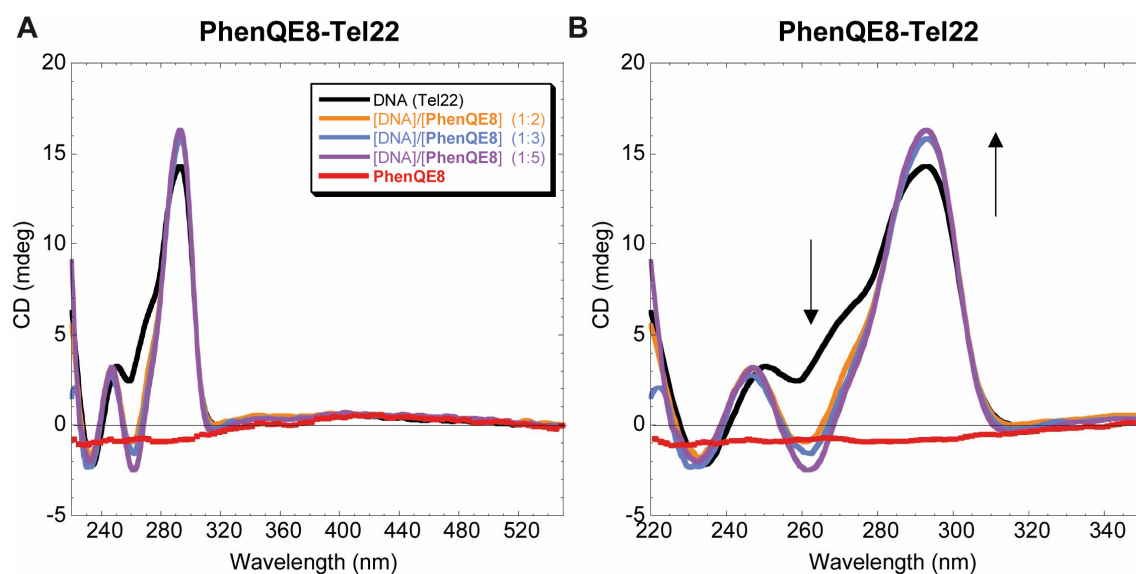

**Figure S14.** A) Changes in the CD spectra of quadruplex Tel22 (8  $\mu$ M strand molarity, 220-350 nm region), folded in the presence of potassium ions (10 mM lithium cacodylate, 90 mM LiCl, 10 mM KCl, pH 7.3, 25  $^{\circ}$ C) upon addition of PhenQE8 at three different quadruplex DNA/PhenQE8 molar ratios (1:2, 1:3 and 1:5). The spectrum of PhenQE8 in the same experimental conditions at 8  $\mu$ M is shown. B) Zoomed view of the CD spectrum (220-350 nm).

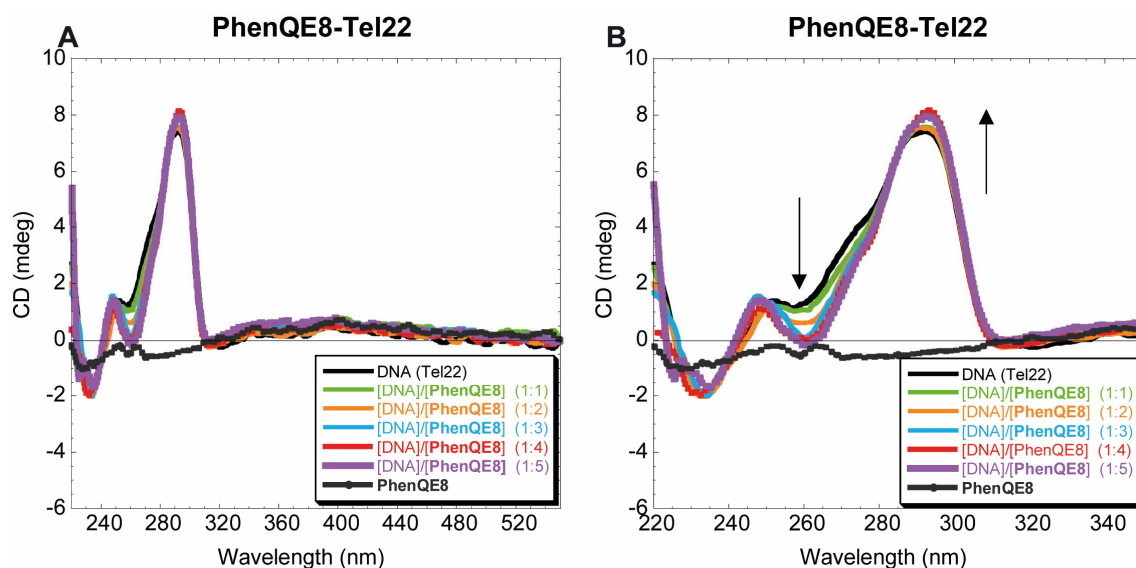

**Figure S15.** A) Changes in the CD spectra of quadruplex Tel22 (4  $\mu$ M strand molarity, 220-350 nm region), folded in the presence of potassium ions (10 mM potassium phosphate, 100 mM KCl, pH 7.2, 25  $^{\circ}$ C) upon addition of PhenQE8 in a molar ratio quadruplex DNA/PhenQE8 ranging from 1:1 to 1:5. The spectrum of PhenQE8 in the same experimental conditions at 8  $\mu$ M is shown. B) Zoomed view of the CD spectrum (220-350 nm).



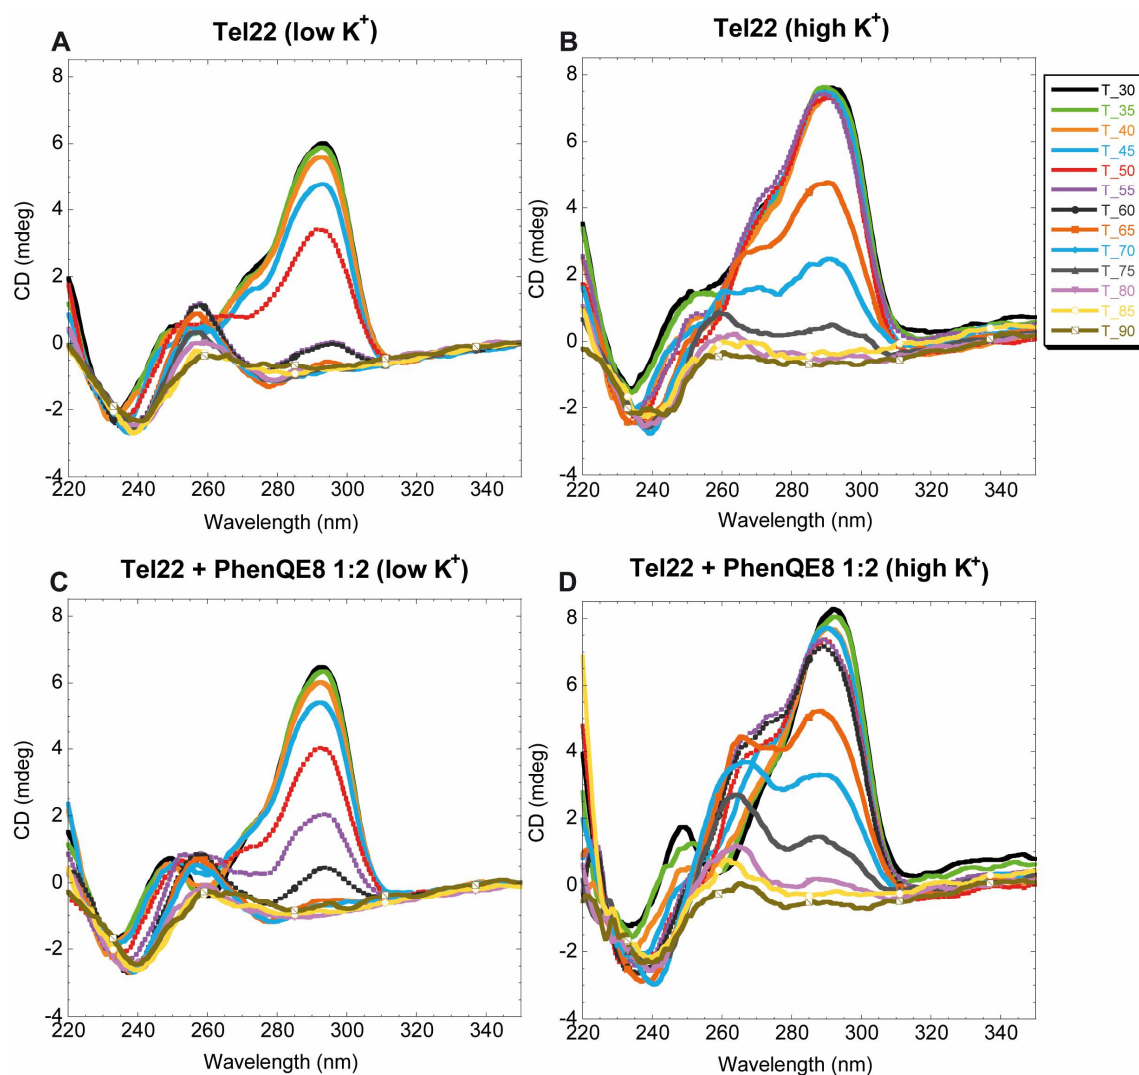

**Figure S16.** Unfolding CD spectra of quadruplex Tel22 (4  $\mu$ M strand molarity, 220-350 nm region) by increasing temperature up to 90 °C A) Under low  $K^+$  salt concentration conditions (10 mM lithium cacodylate, 90 mM LiCl, 10 mM KCl, pH 7.3). B) Under high  $K^+$  salt concentration conditions (10 mM potassium phosphate, 100 mM KCl, pH 7.2). C) Same unfolding process as panel A upon addition of PhenQE8 in a 1:2 quadruplex DNA/PhenQE8 molar ratio. D) Same unfolding process as panel C upon addition of PhenQE8 in a 1:2 quadruplex DNA/PhenQE8 molar ratio.

**Table S2. Nucleic Acid Samples Used in Competition Dialysis Experiments<sup>a</sup>**

| Deoxyribonucleic acid                      | $\lambda$ (nm) | $\varepsilon$ ( $M^{-1} \cdot cm^{-1}$ ) |
|--------------------------------------------|----------------|------------------------------------------|
| Tel22 (5'-AGG GTT AGG GTT AGG GTT AGGG-3') | 260            | 228,500                                  |
| ds17 (5'-CCA GTT CGT AGT AACCC-3')         | 260            | 160,900                                  |
| ds17 (5'-GGG TTA CTA CGA ACTGG-3')         | 260            | 167,400                                  |

<sup>a</sup>  $\varepsilon$  is the molar extinction coefficient at the wavelength  $\lambda$ , expressed in terms of DNA molarity.

**Table S3. Wavelengths and Extinction Coefficients of PhenQE8 in water and in 10 mM potassium phosphate saline buffer (pH 7.2)**

| Compound       | $\lambda$ (nm) | $\varepsilon_{H_2O} (M^{-1} cm^{-1})$ | $\varepsilon_{PBS} (M^{-1} cm^{-1})$ | $\varepsilon_{PBS+Triton} (M^{-1} cm^{-1})$ |
|----------------|----------------|---------------------------------------|--------------------------------------|---------------------------------------------|
| <b>PhenQE8</b> | 311            | 8,385                                 | 5,185 ( $\lambda=305$ )              | 5,803 ( $\lambda=305$ )                     |
|                | 285            | 9,573                                 |                                      |                                             |
