# Supplementary material for: PhenQE8, a Novel Ligand of the Human Telomeric Quadruplex
Source: Int J Mol Sci. 2021 Jan 13;22(2):749. doi: 10.3390/ijms22020749 (PMC7828518; doi:10.3390/ijms22020749)
Supplement: Supplementary file 1 [file ijms-22-00749-s001.zip]

Archive with 4 entries (2 files):
- ijms-1039650/
- ijms-1039650/SupplementaryMaterials/
- ijms-1039650/SupplementaryMaterials/PhenQE8.cif
- ijms-1039650/SupplementaryMaterials/Supporting Materials_IJMS_Gude_revised_highlighted.pdf
