# Supplementary material for: PhenQE8, a Novel Ligand of the Human Telomeric Quadruplex
Source: Int J Mol Sci. 2021 Jan 13;22(2):749. doi: 10.3390/ijms22020749 (PMC7828518; doi:10.3390/ijms22020749)
Supplement: Supplementary file 1 [file ijms-22-00749-s001.zip › ijms-1039650/SupplementaryMaterials/PhenQE8.cif]

#\#CIF_1.1
 
#  CIF produced by WinGX routine CIF_UPDATE
#  Created on 2020-03-02 at 16:07:11
#  Using CIFtbx version 3.0.4  1 Sep 2006
 
#  Dictionary name : cif_core.dic
#  Dictionary vers : 2.4.3
#  Request file    : c:\wingx\files\archive.reqdat
#  CIF files read  : shelx project
 
#------------------ SECTION 1. GLOBAL INFORMATION ---------------------------#
 
data_global
 
#------------------ AUDIT DETAILS -------------------------------------------#
 
_audit_creation_date            2020-03-02
_audit_creation_method          'WinGX routine CIF_UPDATE'
_audit_conform_dict_name        cif_core.dic
_audit_conform_dict_version     2.4.3
_audit_conform_dict_location    ftp://ftp.iucr.org/pub/cif_core.dic
_audit_update_record            ?
 
#------------------ AUTHOR DETAILS -------------------------------------------#
 
# Name and address of author for correspondence
  
_publ_contact_author_name       'Zoila G\'andara'
_publ_contact_author_address
;
Departamento de Qu\'imica Org\'anica y Qu\'imica Inorg\'anica
Instituto de Investigaci\'on Qu\'imica "Andr\'es M. del R\'io" (IQAR)
Universidad de Alcal\'a
28805 Alcal\'a de Henares, Madrid
Spain
;
_publ_contact_author_email       'zoila.gandara@uah.es'


loop_
 _publ_author_name
 _publ_author_address
'Patricia B. Gratal'
;
Departamento de Qu\'imica Org\'anica y Qu\'imica Inorg\'anica
Instituto de Investigaci\'on Qu\'imica Andr\'es M. del R\'io (IQAR)
Universidad de Alcal\'a
Campus Universitario
ES 28805 Alcal\'a de Henares (Madrid)
Spain
;
'Julia G. Quero'
;
Departamento de Qu\'imica Org\'anica y Qu\'imica Inorg\'anica
Instituto de Investigaci\'on Qu\'imica Andr\'es M. del R\'io (IQAR)
Universidad de Alcal\'a
Campus Universitario
ES 28805 Alcal\'a de Henares (Madrid)
Spain
;
'Adri\'an P\'erez-Redondo'
;
Departamento de Qu\'imica Org\'anica y Qu\'imica Inorg\'anica
Instituto de Investigaci\'on Qu\'imica Andr\'es M. del R\'io (IQAR)
Universidad de Alcal\'a
Campus Universitario
ES 28805 Alcal\'a de Henares (Madrid)
Spain
;
'Zoila G\'andara'
;
Departamento de Qu\'imica Org\'anica y Qu\'imica Inorg\'anica
Instituto de Investigaci\'on Qu\'imica Andr\'es M. del R\'io (IQAR)
Universidad de Alcal\'a
Campus Universitario
ES 28805 Alcal\'a de Henares (Madrid)
Spain
;
'Lourdes Gude'
;
Departamento de Qu\'imica Org\'anica y Qu\'imica Inorg\'anica
Instituto de Investigaci\'on Qu\'imica Andr\'es M. del R\'io (IQAR)
Universidad de Alcal\'a
Campus Universitario
ES 28805 Alcal\'a de Henares (Madrid)
Spain
;
 
# Insert blank lines between references
 
_publ_section_references
;
Blessing, R. H. (1995) Acta Cryst., A51, 33-38.
 
Blessing, R. H. (1987) Cryst. Rev. 1, 3-58.
 
Blessing, R. H. (1989) J. Appl. Cryst. 22, 396-397.
 
Cambridge Structural Database: Allen, F. R. (2002). Acta Cryst. B58, 380-388.
 
COLLECT: Nonius (1998). COLLECT. Nonius BV, Delft, The Netherlands.
 
DIRAX: Duisenberg, A. J. M. (1992). J. Appl. Cryst. 25, 92-96.
 
EVALCCD: Duisenberg, A. J. M., Kroon-Batenburg, L. M. J. & Schreurs,
A. M. M. (2003). J. Appl. Cryst. 36, 220-229.
 
MERCURY: Macrae, C. F., Bruno, I. J., Chisholm, J. A., Edgington,
P. R., McCabe, P., Pidcock, E., Rodriguez-Monge, L., Taylor, R.,
van de Streek, J. & Wood, P. A. (2008). J. Appl. Cryst. 41, 466-470.
 
ORTEP-3: Farrugia, L. J. (2012). J. Appl. Cryst. 45, 849-854.
 
PARST: Nardelli, M. (1995). J. Appl. Cryst. 28, 659.
 
PLATON: Spek, A. L. (2009). Acta. Cryst. D65, 148-155.
 
SHELX: Sheldrick, G. M. (2008). Acta Cryst. A64, 112-122.
 
SHELXD: Schneider, T. R. & Sheldrick, G. M. (2002) Acta Cryst. D58, 1772-1779.

WinGX: Farrugia, L. J. (2012). J. Appl. Cryst. 45, 849-854.
 
 
;
 
#------------------  SECTION 2. COMPOUND(S) DETAILS -------------------------#
 
data_PhenQE8
 
_audit_creation_date                    2020-03-02T16:07:11-00:00
_audit_creation_method                  'WinGX routine CIF_UPDATE'
_audit_conform_dict_name                cif_core.dic
_audit_conform_dict_version             2.4.3
_audit_conform_dict_location            ftp://ftp.iucr.org/pub/cif_core.dic
_publ_requested_category                FO
 
#----------------------------------------------------------------------------#
#                   CHEMICAL INFORMATION                                     #
#----------------------------------------------------------------------------#
 
_chemical_formula_moiety                'C16 H16 N10'
_chemical_formula_sum                   'C16 H16 N10'
_chemical_formula_weight                348.39
_chemical_absolute_configuration        unk
 
#----------------------------------------------------------------------------#
#                   UNIT CELL INFORMATION                                    #
#----------------------------------------------------------------------------#
 
_symmetry_cell_setting                  monoclinic
_symmetry_space_group_name_H-M          'C 2'
_symmetry_space_group_name_Hall         'C 2y'
_symmetry_Int_Tables_number             5
loop_
    _symmetry_equiv_pos_as_xyz
'x, y, z'
'-x, y, -z'
'x+1/2, y+1/2, z'
'-x+1/2, y+1/2, -z'
 
_cell_length_a                          33.889(4)
_cell_length_b                          11.3082(8)
_cell_length_c                          9.9646(9)
_cell_angle_alpha                       90
_cell_angle_beta                        91.500(7)
_cell_angle_gamma                       90
_cell_volume                            3817.3(6)
_cell_formula_units_Z                   6
_cell_measurement_temperature           200(2)
_cell_measurement_reflns_used           68
_cell_measurement_theta_min             3
_cell_measurement_theta_max             21
_cell_measurement_wavelength            0.71073
 
#----------------------------------------------------------------------------#
#                   CRYSTAL INFORMATION                                      #
#----------------------------------------------------------------------------#
 
_exptl_crystal_description              prism
_exptl_crystal_colour                   colourless
_exptl_crystal_size_max                 0.46
_exptl_crystal_size_mid                 0.22
_exptl_crystal_size_min                 0.08
_exptl_crystal_density_diffrn           0.909
_exptl_crystal_density_method           'not measured'
_exptl_crystal_F_000                    1092
loop_
    _exptl_crystal_face_index_h
    _exptl_crystal_face_index_k
    _exptl_crystal_face_index_l
    _exptl_crystal_face_perp_dist
0 13 1 0.161
0 0 -1 0.314
0 1 16 0.273
0 -1 0 0.084
-1 0 0 0.042
1 0 0 0.041
 
 
#----------------------------------------------------------------------------#
#                   ABSORPTION CORRECTION                                    #
#----------------------------------------------------------------------------#
 
_exptl_absorpt_coefficient_mu           0.061
_exptl_absorpt_correction_type          multi-scan
_exptl_absorpt_correction_T_min         0.886
_exptl_absorpt_correction_T_max         0.971
_exptl_absorpt_process_details
;
 R.H. Blessing, Acta Cryst. (1995), A51, 33-38
;
 
#----------------------------------------------------------------------------#
#                   DATA COLLECTION                                          #
#----------------------------------------------------------------------------#
 
_diffrn_source                          'Enraf Nonius FR590'
_diffrn_ambient_temperature             200(2)
_diffrn_radiation_wavelength            0.71073
_diffrn_radiation_type                  MoK\a
_diffrn_radiation_monochromator         'horizonally mounted graphite crystal'
_diffrn_radiation_probe                 x-ray
_diffrn_detector                        'CCD plate'
_diffrn_detector_area_resol_mean        9
_diffrn_orient_matrix_ub_11             0.017307
_diffrn_orient_matrix_ub_12             0.032926
_diffrn_orient_matrix_ub_13             0.073741
_diffrn_orient_matrix_ub_21             -0.023598
_diffrn_orient_matrix_ub_22             0.010832
_diffrn_orient_matrix_ub_23             0.05692
_diffrn_orient_matrix_ub_31             0.003863
_diffrn_orient_matrix_ub_32             -0.081355
_diffrn_orient_matrix_ub_33             0.037422
_diffrn_measurement_device              '95mm CCD camera on \k-goniostat'
_diffrn_measurement_device_type         KappaCCD
_diffrn_measurement_method              'CCD rotation images, thick slices'
_diffrn_standards_number                0
_diffrn_standards_interval_time         .
_diffrn_standards_interval_count        .
_diffrn_standards_decay_%               ?
_diffrn_reflns_av_R_equivalents         0.1252
_diffrn_reflns_av_unetI/netI            0.0692
_diffrn_reflns_number                   42745
_diffrn_reflns_limit_h_min              -44
_diffrn_reflns_limit_h_max              44
_diffrn_reflns_limit_k_min              -14
_diffrn_reflns_limit_k_max              14
_diffrn_reflns_limit_l_min              -12
_diffrn_reflns_limit_l_max              12
_diffrn_reflns_theta_min                3.198
_diffrn_reflns_theta_max                27.499
_diffrn_reflns_theta_full               25
_diffrn_measured_fraction_theta_full
                                        0.996
_diffrn_measured_fraction_theta_max
                                        0.996
_diffrn_reflns_Laue_measured_fraction_full
                                        0.996
_diffrn_reflns_Laue_measured_fraction_max
                                        0.996
_diffrn_reflns_point_group_measured_fraction_full
                                        0.997
_diffrn_reflns_point_group_measured_fraction_max
                                        0.989
_reflns_Friedel_fraction_full           0.997
_reflns_Friedel_fraction_max            0.981
_reflns_Friedel_coverage                0.89
_reflns_number_total                    8673
_reflns_number_gt                       6837
_reflns_threshold_expression            'I > 2\s(I)'
_diffrn_reflns_reduction_process
;
        Scaled and merged with Sortav
        R.H. Blessing, (1987) Cryst. Rev. 1, 3-58
        R.H. Blessing, (1989) J. Appl. Cryst. 22, 396-397
;
 
#----------------------------------------------------------------------------#
#                   COMPUTER PROGRAMS USED                                   #
#----------------------------------------------------------------------------#
 
_computing_data_collection              'Collect (Bruker AXS BV, 1997-2004)'
_computing_cell_refinement
                                  'Dirax/lsq (Duisenberg & Schreurs, 1989-2000)'
_computing_data_reduction
                                     'EvalCCD (Duisenberg & Schreurs 1990-2000)'
_computing_structure_solution           'SHELXT-2014 (Sheldrick, 2014)'
_computing_structure_refinement         'SHELXL-2014/7 (Sheldrick, 2014)'
_computing_molecular_graphics           'ORTEP-3 for Windows (Farrugia, 2012)'
_computing_publication_material
                                   'WinGX publication routines (Farrugia, 2012)'
 
#----------------------------------------------------------------------------#
#                   STRUCTURE SOLUTION                                       #
#----------------------------------------------------------------------------#
 
_atom_sites_solution_primary            dual
_atom_sites_solution_secondary          dual
_atom_sites_solution_hydrogens          geom
 
#----------------------------------------------------------------------------#
#                   REFINEMENT INFORMATION                                   #
#----------------------------------------------------------------------------#
 
_refine_ls_structure_factor_coef        Fsqd
_refine_ls_matrix_type                  full
_refine_ls_weighting_scheme             calc
_refine_ls_weighting_details
             'w=1/[\s^2^(Fo^2^)+(0.0611P)^2^+15.7889P] where P=(Fo^2^+2Fc^2^)/3'
_refine_ls_hydrogen_treatment           constr
_refine_ls_extinction_method            none
_refine_ls_number_reflns                8673
_refine_ls_number_parameters            358
_refine_ls_number_restraints            1
_refine_ls_number_constraints           0
_refine_ls_R_factor_all                 0.1027
_refine_ls_R_factor_gt                  0.0814
_refine_ls_wR_factor_ref                0.206
_refine_ls_wR_factor_gt                 0.1946
_refine_ls_goodness_of_fit_ref          1.068
_refine_ls_restrained_S_all             1.068
_refine_ls_shift/su_max                 0.002
_refine_ls_shift/su_mean                0
_refine_diff_density_max                0.464
_refine_diff_density_min                -0.348
_refine_diff_density_rms                0.076
 
#----------------------------------------------------------------------------#
#                   CONSTRAINTS AND RESTRAINTS                               #
#----------------------------------------------------------------------------#
 
 
#----------------------------------------------------------------------------#
#                   ATOMIC TYPES, COORDINATES AND THERMAL PARAMETERS         #
#----------------------------------------------------------------------------#
 
loop_
    _atom_type_symbol
    _atom_type_description
    _atom_type_scat_dispersion_real
    _atom_type_scat_dispersion_imag
    _atom_type_scat_source
C C 0.0033 0.0016 'International Tables Vol C Tables 4.2.6.8 and 6.1.1.4'
H H 0 0 'International Tables Vol C Tables 4.2.6.8 and 6.1.1.4'
N N 0.0061 0.0033 'International Tables Vol C Tables 4.2.6.8 and 6.1.1.4'
 
loop_
    _atom_site_label
    _atom_site_type_symbol
    _atom_site_fract_x
    _atom_site_fract_y
    _atom_site_fract_z
    _atom_site_U_iso_or_equiv
    _atom_site_adp_type
    _atom_site_occupancy
    _atom_site_site_symmetry_order
    _atom_site_calc_flag
    _atom_site_refinement_flags_posn
    _atom_site_refinement_flags_adp
    _atom_site_refinement_flags_occupancy
    _atom_site_disorder_assembly
    _atom_site_disorder_group
C1 C 0.55854(15) 0.4216(5) 0.3506(5) 0.0190(11) Uani 1 1 d . . . . .
C2 C 0.58027(16) 0.3163(6) 0.3558(6) 0.0281(13) Uani 1 1 d . . . . .
H2 H 0.6083 0.3186 0.3633 0.034 Uiso 1 1 calc R U . . .
C3 C 0.56077(16) 0.2091(6) 0.3500(6) 0.0290(13) Uani 1 1 d . . . . .
H3 H 0.5754 0.1375 0.353 0.035 Uiso 1 1 calc R U . . .
C4 C 0.51890(17) 0.2057(6) 0.3395(6) 0.0287(13) Uani 1 1 d . . . . .
C5 C 0.49784(17) 0.0967(5) 0.3327(6) 0.0260(13) Uani 1 1 d . . . . .
H5 H 0.5118 0.024 0.338 0.031 Uiso 1 1 calc R U . . .
C6 C 0.45807(19) 0.0966(6) 0.3187(7) 0.0321(14) Uani 1 1 d . . . . .
H6 H 0.4444 0.0236 0.3107 0.039 Uiso 1 1 calc R U . . .
C7 C 0.43617(16) 0.2062(5) 0.3156(6) 0.0237(12) Uani 1 1 d . . . . .
C8 C 0.39435(16) 0.2075(6) 0.3037(7) 0.0298(14) Uani 1 1 d . . . . .
H8 H 0.3797 0.136 0.2969 0.036 Uiso 1 1 calc R U . . .
C9 C 0.37575(15) 0.3151(5) 0.3022(6) 0.0271(13) Uani 1 1 d . . . . .
H9 H 0.3478 0.3194 0.2947 0.032 Uiso 1 1 calc R U . . .
C10 C 0.39810(16) 0.4181(6) 0.3119(6) 0.0253(12) Uani 1 1 d . . . . .
C11 C 0.45565(14) 0.3151(5) 0.3218(5) 0.0224(12) Uani 1 1 d . . . . .
C12 C 0.49864(15) 0.3149(5) 0.3319(5) 0.0199(11) Uani 1 1 d . . . . .
C13 C 0.57751(16) 0.5388(5) 0.3543(7) 0.0273(13) Uani 1 1 d . . . . .
H13 H 0.5624 0.6095 0.349 0.033 Uiso 1 1 calc R U . . .
C14 C 0.67174(16) 0.6558(6) 0.3724(7) 0.0301(14) Uani 1 1 d . . . . .
C15 C 0.37864(16) 0.5362(5) 0.3104(6) 0.0268(13) Uani 1 1 d . . . . .
H15 H 0.3942 0.606 0.3153 0.032 Uiso 1 1 calc R U . . .
C16 C 0.28750(17) 0.6743(7) 0.2980(6) 0.0343(15) Uani 1 1 d . . . . .
N1 N 0.51872(13) 0.4172(4) 0.3390(5) 0.0196(9) Uani 1 1 d . . . . .
N2 N 0.43740(13) 0.4219(4) 0.3211(5) 0.0228(10) Uani 1 1 d . . . . .
N3 N 0.61505(13) 0.5413(4) 0.3652(5) 0.0232(10) Uani 1 1 d . . . . .
N4 N 0.63159(14) 0.6494(4) 0.3724(6) 0.0297(12) Uani 1 1 d . . . . .
H4 H 0.617 0.7136 0.377 0.036 Uiso 1 1 calc R U . . .
N5 N 0.68713(16) 0.7638(5) 0.3753(6) 0.0390(14) Uani 1 1 d . . . . .
H5A H 0.7129 0.7731 0.3758 0.047 Uiso 1 1 calc R U . . .
H5B H 0.6716 0.826 0.3767 0.047 Uiso 1 1 calc R U . . .
N6 N 0.69340(15) 0.5604(5) 0.3702(6) 0.0356(13) Uani 1 1 d . . . . .
H6A H 0.7168 0.5775 0.3924 0.053 Uiso 1 1 calc R U . . .
N7 N 0.34141(13) 0.5436(5) 0.3026(5) 0.0275(11) Uani 1 1 d . . . . .
N8 N 0.32690(14) 0.6577(5) 0.3004(6) 0.0318(12) Uani 1 1 d . . . . .
H8A H 0.3431 0.7186 0.3007 0.038 Uiso 1 1 calc R U . . .
N9 N 0.27479(17) 0.7831(6) 0.2910(7) 0.0480(17) Uani 1 1 d . . . . .
H9A H 0.2493 0.7978 0.2909 0.058 Uiso 1 1 calc R U . . .
H9B H 0.2917 0.8419 0.2864 0.058 Uiso 1 1 calc R U . . .
N10 N 0.26313(15) 0.5826(5) 0.3051(7) 0.0398(14) Uani 1 1 d . . . . .
H10 H 0.2582 0.5565 0.2275 0.06 Uiso 1 1 calc R U . . .
C21 C 0.42057(18) 0.3072(6) -0.0245(6) 0.0312(14) Uani 1 1 d . . . . .
C22 C 0.39765(18) 0.2016(7) -0.0318(7) 0.0378(16) Uani 1 1 d . . . . .
H22 H 0.3697 0.2049 -0.0396 0.045 Uiso 1 1 calc R U . . .
C23 C 0.41673(19) 0.0964(7) -0.0276(7) 0.0388(16) Uani 1 1 d . . . . .
H23 H 0.4019 0.0253 -0.0323 0.047 Uiso 1 1 calc R U . . .
C24 C 0.4587(2) 0.0904(6) -0.0162(7) 0.0343(15) Uani 1 1 d . . . . .
C25 C 0.4799(2) -0.0172(6) -0.0082(7) 0.0365(16) Uani 1 1 d . . . . .
H25 H 0.4661 -0.0902 -0.0143 0.044 Uiso 1 1 calc R U . . .
C26 C 0.47862(17) 0.2020(6) -0.0080(6) 0.0286(13) Uani 1 1 d . . . . .
C27 C 0.40209(19) 0.4228(7) -0.0274(7) 0.0356(15) Uani 1 1 d . . . . .
H27 H 0.4179 0.4922 -0.0271 0.043 Uiso 1 1 calc R U . . .
C28 C 0.30867(18) 0.5551(7) -0.0310(7) 0.0379(16) Uani 1 1 d . . . . .
N21 N 0.45982(14) 0.3063(5) -0.0129(5) 0.0282(11) Uani 1 1 d . . . . .
N22 N 0.36437(15) 0.4315(5) -0.0305(6) 0.0336(12) Uani 1 1 d . . . . .
N23 N 0.34853(15) 0.5429(5) -0.0368(6) 0.0368(13) Uani 1 1 d . . . . .
H23A H 0.3638 0.6053 -0.0445 0.044 Uiso 1 1 calc R U . . .
N24 N 0.29373(18) 0.6629(7) -0.0353(7) 0.0510(17) Uani 1 1 d . . . . .
H24 H 0.3121 0.7126 -0.0332 0.076 Uiso 1 1 calc R U . . .
N25 N 0.28644(18) 0.4594(7) -0.0228(7) 0.0506(17) Uani 1 1 d . . . . .
H25A H 0.2606 0.4661 -0.02 0.061 Uiso 1 1 calc R U . . .
H25B H 0.2975 0.3889 -0.0201 0.061 Uiso 1 1 calc R U . . .
 
loop_
    _atom_site_aniso_label
    _atom_site_aniso_U_11
    _atom_site_aniso_U_22
    _atom_site_aniso_U_33
    _atom_site_aniso_U_23
    _atom_site_aniso_U_13
    _atom_site_aniso_U_12
C1 0.013(2) 0.021(3) 0.023(3) -0.002(2) 0.003(2) 0.007(2)
C2 0.014(2) 0.036(3) 0.035(3) 0.007(3) 0.003(2) 0.006(2)
C3 0.018(3) 0.029(3) 0.040(3) 0.005(3) 0.006(2) 0.011(2)
C4 0.019(3) 0.039(4) 0.028(3) -0.007(3) 0.002(2) 0.008(3)
C5 0.030(3) 0.020(3) 0.029(3) -0.002(2) 0.003(2) 0.010(2)
C6 0.031(3) 0.024(3) 0.040(4) -0.004(3) -0.006(3) -0.007(3)
C7 0.020(3) 0.020(3) 0.032(3) 0.001(2) 0.003(2) 0.001(2)
C8 0.014(2) 0.025(3) 0.049(4) -0.008(3) 0.000(2) -0.006(2)
C9 0.007(2) 0.028(3) 0.046(4) -0.002(3) -0.005(2) 0.000(2)
C10 0.013(2) 0.035(3) 0.028(3) -0.005(3) 0.004(2) 0.000(2)
C11 0.010(2) 0.034(3) 0.024(3) 0.001(3) 0.0028(19) -0.003(2)
C12 0.015(2) 0.022(3) 0.023(3) -0.001(2) 0.005(2) 0.003(2)
C13 0.012(2) 0.024(3) 0.046(4) 0.001(3) 0.000(2) 0.003(2)
C14 0.011(2) 0.037(4) 0.042(4) 0.004(3) 0.000(2) -0.004(2)
C15 0.015(2) 0.028(3) 0.037(3) 0.000(3) 0.004(2) 0.002(2)
C16 0.018(3) 0.051(4) 0.034(3) 0.008(3) 0.005(2) 0.007(3)
N1 0.015(2) 0.016(2) 0.028(2) 0.0011(19) 0.0016(18) 0.0016(17)
N2 0.012(2) 0.024(2) 0.032(3) 0.001(2) 0.0020(18) 0.0022(18)
N3 0.014(2) 0.025(3) 0.030(3) 0.003(2) 0.0033(18) -0.0003(18)
N4 0.013(2) 0.023(3) 0.053(3) 0.005(2) 0.005(2) -0.0014(19)
N5 0.020(2) 0.027(3) 0.071(4) 0.006(3) 0.004(2) -0.003(2)
N6 0.017(2) 0.039(3) 0.052(3) 0.005(3) 0.005(2) -0.002(2)
N7 0.012(2) 0.031(3) 0.040(3) 0.000(2) 0.0019(19) 0.0048(19)
N8 0.016(2) 0.022(3) 0.057(3) 0.004(2) 0.004(2) 0.0016(19)
N9 0.023(3) 0.042(4) 0.080(5) 0.022(3) 0.013(3) 0.020(3)
N10 0.014(2) 0.044(4) 0.062(4) 0.005(3) -0.001(2) 0.003(2)
C21 0.026(3) 0.044(4) 0.024(3) 0.005(3) 0.001(2) 0.004(3)
C22 0.017(3) 0.051(4) 0.045(4) -0.007(3) 0.007(3) -0.006(3)
C23 0.026(3) 0.043(4) 0.048(4) 0.001(3) 0.003(3) -0.009(3)
C24 0.033(3) 0.039(4) 0.031(3) -0.005(3) 0.006(3) -0.011(3)
C25 0.045(4) 0.021(3) 0.044(4) -0.001(3) 0.013(3) -0.012(3)
C26 0.029(3) 0.033(4) 0.024(3) 0.002(3) 0.002(2) 0.003(3)
C27 0.027(3) 0.043(4) 0.038(4) -0.001(3) 0.000(3) -0.005(3)
C28 0.020(3) 0.053(4) 0.040(4) 0.003(3) -0.004(3) 0.007(3)
N21 0.022(2) 0.031(3) 0.032(3) 0.007(2) 0.005(2) 0.000(2)
N22 0.023(3) 0.037(3) 0.041(3) 0.007(3) 0.006(2) 0.009(2)
N23 0.021(2) 0.046(4) 0.043(3) -0.002(3) 0.000(2) 0.004(2)
N24 0.033(3) 0.063(5) 0.057(4) -0.007(4) -0.004(3) 0.021(3)
N25 0.023(3) 0.061(4) 0.067(4) 0.004(4) -0.001(3) 0.008(3)
 
 
#----------------------------------------------------------------------------#
#                   MOLECULAR GEOMETRY                                       #
#----------------------------------------------------------------------------#
 
_geom_special_details
;
 All esds (except the esd in the dihedral angle between two l.s. planes)
 are estimated using the full covariance matrix.  The cell esds are taken
 into account individually in the estimation of esds in distances, angles
 and torsion angles; correlations between esds in cell parameters are only
 used when they are defined by crystal symmetry.  An approximate (isotropic)
 treatment of cell esds is used for estimating esds involving l.s. planes.
;
loop_
    _geom_bond_atom_site_label_1
    _geom_bond_atom_site_label_2
    _geom_bond_distance
    _geom_bond_site_symmetry_2
    _geom_bond_publ_flag
C1 N1 1.353(7) . ?
C1 C2 1.400(8) . ?
C1 C13 1.473(8) . ?
C2 C3 1.381(9) . ?
C2 H2 0.95 . ?
C3 C4 1.420(8) . ?
C3 H3 0.95 . ?
C4 C12 1.414(8) . ?
C4 C5 1.425(9) . ?
C5 C6 1.351(9) . ?
C5 H5 0.95 . ?
C6 C7 1.444(9) . ?
C6 H6 0.95 . ?
C7 C11 1.398(8) . ?
C7 C8 1.419(7) . ?
C8 C9 1.371(8) . ?
C8 H8 0.95 . ?
C9 C10 1.391(9) . ?
C9 H9 0.95 . ?
C10 N2 1.333(7) . ?
C10 C15 1.489(8) . ?
C11 N2 1.356(8) . ?
C11 C12 1.458(7) . ?
C12 N1 1.343(7) . ?
C13 N3 1.274(7) . ?
C13 H13 0.95 . ?
C14 N6 1.306(8) . ?
C14 N5 1.327(9) . ?
C14 N4 1.362(7) . ?
C15 N7 1.265(7) . ?
C15 H15 0.95 . ?
C16 N9 1.305(10) . ?
C16 N10 1.329(9) . ?
C16 N8 1.348(7) . ?
N3 N4 1.347(7) . ?
N4 H4 0.88 . ?
N5 H5A 0.88 . ?
N5 H5B 0.88 . ?
N6 H6A 0.84 . ?
N7 N8 1.381(7) . ?
N8 H8A 0.88 . ?
N9 H9A 0.88 . ?
N9 H9B 0.88 . ?
N10 H10 0.84 . ?
C21 N21 1.332(8) . ?
C21 C22 1.425(10) . ?
C21 C27 1.450(10) . ?
C22 C23 1.354(11) . ?
C22 H22 0.95 . ?
C23 C24 1.425(9) . ?
C23 H23 0.95 . ?
C24 C25 1.415(10) . ?
C24 C26 1.432(9) . ?
C25 C25 1.366(14) 2_655 ?
C25 H25 0.95 . ?
C26 N21 1.341(8) . ?
C26 C26 1.454(12) 2_655 ?
C27 N22 1.282(8) . ?
C27 H27 0.95 . ?
C28 N24 1.320(10) . ?
C28 N25 1.323(10) . ?
C28 N23 1.360(8) . ?
N22 N23 1.370(8) . ?
N23 H23A 0.88 . ?
N24 H24 0.84 . ?
N25 H25A 0.88 . ?
N25 H25B 0.88 . ?
 
loop_
    _geom_angle_atom_site_label_1
    _geom_angle_atom_site_label_2
    _geom_angle_atom_site_label_3
    _geom_angle
    _geom_angle_site_symmetry_1
    _geom_angle_site_symmetry_3
    _geom_angle_publ_flag
N1 C1 C2 119.6(5) . . ?
N1 C1 C13 118.0(5) . . ?
C2 C1 C13 122.4(5) . . ?
C3 C2 C1 119.6(5) . . ?
C3 C2 H2 120.2 . . ?
C1 C2 H2 120.2 . . ?
C2 C3 C4 120.2(5) . . ?
C2 C3 H3 119.9 . . ?
C4 C3 H3 119.9 . . ?
C12 C4 C3 117.6(6) . . ?
C12 C4 C5 120.7(5) . . ?
C3 C4 C5 121.7(6) . . ?
C6 C5 C4 120.2(5) . . ?
C6 C5 H5 119.9 . . ?
C4 C5 H5 119.9 . . ?
C5 C6 C7 120.8(6) . . ?
C5 C6 H6 119.6 . . ?
C7 C6 H6 119.6 . . ?
C11 C7 C8 117.6(5) . . ?
C11 C7 C6 120.9(5) . . ?
C8 C7 C6 121.5(5) . . ?
C9 C8 C7 117.9(5) . . ?
C9 C8 H8 121.1 . . ?
C7 C8 H8 121.1 . . ?
C8 C9 C10 119.6(5) . . ?
C8 C9 H9 120.2 . . ?
C10 C9 H9 120.2 . . ?
N2 C10 C9 124.9(5) . . ?
N2 C10 C15 114.4(5) . . ?
C9 C10 C15 120.7(5) . . ?
N2 C11 C7 124.7(4) . . ?
N2 C11 C12 117.2(5) . . ?
C7 C11 C12 118.1(5) . . ?
N1 C12 C4 120.3(5) . . ?
N1 C12 C11 120.4(5) . . ?
C4 C12 C11 119.2(5) . . ?
N3 C13 C1 117.1(5) . . ?
N3 C13 H13 121.5 . . ?
C1 C13 H13 121.5 . . ?
N6 C14 N5 122.6(5) . . ?
N6 C14 N4 121.2(6) . . ?
N5 C14 N4 116.2(6) . . ?
N7 C15 C10 120.1(5) . . ?
N7 C15 H15 120 . . ?
C10 C15 H15 120 . . ?
N9 C16 N10 122.3(6) . . ?
N9 C16 N8 117.2(6) . . ?
N10 C16 N8 120.5(6) . . ?
C12 N1 C1 122.7(5) . . ?
C10 N2 C11 115.2(5) . . ?
C13 N3 N4 115.9(5) . . ?
N3 N4 C14 117.5(5) . . ?
N3 N4 H4 121.2 . . ?
C14 N4 H4 121.2 . . ?
C14 N5 H5A 120 . . ?
C14 N5 H5B 120 . . ?
H5A N5 H5B 120 . . ?
C14 N6 H6A 109.5 . . ?
C15 N7 N8 114.7(5) . . ?
C16 N8 N7 118.8(5) . . ?
C16 N8 H8A 120.6 . . ?
N7 N8 H8A 120.6 . . ?
C16 N9 H9A 120 . . ?
C16 N9 H9B 120 . . ?
H9A N9 H9B 120 . . ?
C16 N10 H10 109.5 . . ?
N21 C21 C22 122.7(6) . . ?
N21 C21 C27 116.0(6) . . ?
C22 C21 C27 121.3(6) . . ?
C23 C22 C21 118.4(6) . . ?
C23 C22 H22 120.8 . . ?
C21 C22 H22 120.8 . . ?
C22 C23 C24 121.3(6) . . ?
C22 C23 H23 119.4 . . ?
C24 C23 H23 119.4 . . ?
C25 C24 C23 123.4(6) . . ?
C25 C24 C26 121.0(6) . . ?
C23 C24 C26 115.5(6) . . ?
C25 C25 C24 120.7(4) 2_655 . ?
C25 C25 H25 119.7 2_655 . ?
C24 C25 H25 119.7 . . ?
N21 C26 C24 123.4(6) . . ?
N21 C26 C26 118.4(3) . 2_655 ?
C24 C26 C26 118.3(4) . 2_655 ?
N22 C27 C21 119.9(6) . . ?
N22 C27 H27 120 . . ?
C21 C27 H27 120 . . ?
N24 C28 N25 122.6(6) . . ?
N24 C28 N23 118.2(7) . . ?
N25 C28 N23 119.2(7) . . ?
C21 N21 C26 118.8(6) . . ?
C27 N22 N23 117.4(6) . . ?
C28 N23 N22 118.6(6) . . ?
C28 N23 H23A 120.7 . . ?
N22 N23 H23A 120.7 . . ?
C28 N24 H24 109.5 . . ?
C28 N25 H25A 120 . . ?
C28 N25 H25B 120 . . ?
H25A N25 H25B 120 . . ?
 
_shelx_res_file
;
 
    shelx.res created by SHELXL-2014/7
 
TITL shelxt_a.res in C2
CELL  0.71073  33.8887  11.3082   9.9646   90.000   91.500   90.000
ZERR     6.00   0.0037   0.0008   0.0009    0.000    0.007    0.000
LATT   -7
SYMM   -X,+Y,-Z
SFAC  C    H    N
UNIT  96  96  60
MERG   2
ABIN
FMAP   2
PLAN   50
ACTA    50.00
BOND   $H
L.S.  10    0  200
TEMP   -73.00
WGHT    0.061100   15.788900
FVAR       0.54355   0.51916   0.71336   0.66685
MOLE    1
C1    1    0.558545    0.421626    0.350559    11.00000    0.01310    0.02150 =
         0.02268   -0.00192    0.00309    0.00682
C2    1    0.580268    0.316315    0.355809    11.00000    0.01359    0.03552 =
         0.03525    0.00682    0.00254    0.00647
AFIX  43
H2    2    0.608261    0.318590    0.363335    11.00000   -1.20000
AFIX   0
C3    1    0.560765    0.209114    0.349983    11.00000    0.01788    0.02914 =
         0.04029    0.00487    0.00635    0.01064
AFIX  43
H3    2    0.575391    0.137451    0.352976    11.00000   -1.20000
AFIX   0
C4    1    0.518904    0.205739    0.339530    11.00000    0.01888    0.03936 =
         0.02804   -0.00656    0.00210    0.00796
C5    1    0.497840    0.096729    0.332707    11.00000    0.02987    0.01966 =
         0.02861   -0.00214    0.00269    0.01030
AFIX  43
H5    2    0.511797    0.023954    0.338045    11.00000   -1.20000
AFIX   0
C6    1    0.458069    0.096593    0.318664    11.00000    0.03147    0.02435 =
         0.04007   -0.00358   -0.00628   -0.00654
AFIX  43
H6    2    0.444352    0.023560    0.310716    11.00000   -1.20000
AFIX   0
C7    1    0.436173    0.206188    0.315598    11.00000    0.01955    0.01985 =
         0.03183    0.00123    0.00283    0.00107
C8    1    0.394355    0.207456    0.303674    11.00000    0.01446    0.02549 =
         0.04943   -0.00797   -0.00027   -0.00558
AFIX  43
H8    2    0.379715    0.135966    0.296914    11.00000   -1.20000
AFIX   0
C9    1    0.375754    0.315118    0.302220    11.00000    0.00697    0.02821 =
         0.04567   -0.00205   -0.00511    0.00018
AFIX  43
H9    2    0.347787    0.319362    0.294685    11.00000   -1.20000
AFIX   0
C10   1    0.398097    0.418120    0.311851    11.00000    0.01326    0.03520 =
         0.02775   -0.00452    0.00426    0.00007
C11   1    0.455647    0.315121    0.321825    11.00000    0.00975    0.03354 =
         0.02409    0.00063    0.00279   -0.00331
C12   1    0.498638    0.314924    0.331931    11.00000    0.01528    0.02205 =
         0.02270   -0.00119    0.00499    0.00282
C13   1    0.577505    0.538846    0.354340    11.00000    0.01216    0.02366 =
         0.04604    0.00119    0.00005    0.00337
AFIX  43
H13   2    0.562405    0.609547    0.348955    11.00000   -1.20000
AFIX   0
C14   1    0.671736    0.655842    0.372397    11.00000    0.01087    0.03734 =
         0.04213    0.00363    0.00037   -0.00427
C15   1    0.378637    0.536162    0.310385    11.00000    0.01487    0.02826 =
         0.03732   -0.00004    0.00357    0.00168
AFIX  43
H15   2    0.394202    0.605973    0.315335    11.00000   -1.20000
AFIX   0
C16   1    0.287504    0.674291    0.297990    11.00000    0.01775    0.05110 =
         0.03424    0.00831    0.00473    0.00675
N1    3    0.518715    0.417196    0.339040    11.00000    0.01455    0.01645 =
         0.02791    0.00107    0.00164    0.00165
N2    3    0.437399    0.421892    0.321050    11.00000    0.01236    0.02446 =
         0.03153    0.00073    0.00196    0.00224
N3    3    0.615053    0.541259    0.365153    11.00000    0.01446    0.02504 =
         0.03015    0.00288    0.00329   -0.00031
N4    3    0.631590    0.649435    0.372414    11.00000    0.01256    0.02336 =
         0.05343    0.00468    0.00455   -0.00140
AFIX  43
H4    2    0.617003    0.713618    0.377002    11.00000   -1.20000
AFIX   0
N5    3    0.687135    0.763768    0.375278    11.00000    0.01983    0.02685 =
         0.07059    0.00555    0.00372   -0.00334
AFIX  93
H5A   2    0.712918    0.773089    0.375778    11.00000   -1.20000
H5B   2    0.671560    0.825999    0.376689    11.00000   -1.20000
AFIX   0
N6    3    0.693404    0.560414    0.370211    11.00000    0.01676    0.03855 =
         0.05177    0.00505    0.00498   -0.00221
AFIX 147
H6A   2    0.716803    0.577463    0.392392    11.00000   -1.50000
AFIX   0
N7    3    0.341413    0.543622    0.302558    11.00000    0.01182    0.03122 =
         0.03955   -0.00030    0.00188    0.00482
N8    3    0.326899    0.657738    0.300425    11.00000    0.01636    0.02172 =
         0.05738    0.00365    0.00384    0.00160
AFIX  43
H8A   2    0.343090    0.718582    0.300653    11.00000   -1.20000
AFIX   0
N9    3    0.274794    0.783130    0.291006    11.00000    0.02255    0.04186 =
         0.08023    0.02209    0.01311    0.01996
AFIX  93
H9A   2    0.249288    0.797753    0.290915    11.00000   -1.20000
H9B   2    0.291730    0.841889    0.286388    11.00000   -1.20000
AFIX   0
N10   3    0.263134    0.582552    0.305126    11.00000    0.01358    0.04359 =
         0.06222    0.00532   -0.00131    0.00323
AFIX 147
H10   2    0.258201    0.556515    0.227539    11.00000   -1.50000
AFIX   0
MOLE    2
C21   1    0.420569    0.307181   -0.024466    11.00000    0.02560    0.04359 =
         0.02441    0.00518    0.00096    0.00448
C22   1    0.397646    0.201591   -0.031847    11.00000    0.01743    0.05103 =
         0.04520   -0.00705    0.00706   -0.00588
AFIX  43
H22   2    0.369668    0.204923   -0.039575    11.00000   -1.20000
AFIX   0
C23   1    0.416731    0.096439   -0.027571    11.00000    0.02608    0.04292 =
         0.04755    0.00089    0.00315   -0.00865
AFIX  43
H23   2    0.401863    0.025272   -0.032273    11.00000   -1.20000
AFIX   0
C24   1    0.458690    0.090409   -0.016153    11.00000    0.03349    0.03892 =
         0.03090   -0.00526    0.00599   -0.01074
C25   1    0.479931   -0.017175   -0.008183    11.00000    0.04460    0.02105 =
         0.04444   -0.00056    0.01278   -0.01152
AFIX  43
H25   2    0.466130   -0.090181   -0.014277    11.00000   -1.20000
AFIX   0
C26   1    0.478621    0.201977   -0.008032    11.00000    0.02949    0.03282 =
         0.02355    0.00193    0.00154    0.00281
C27   1    0.402095    0.422846   -0.027398    11.00000    0.02655    0.04255 =
         0.03763   -0.00098    0.00032   -0.00469
AFIX  43
H27   2    0.417939    0.492154   -0.027054    11.00000   -1.20000
AFIX   0
C28   1    0.308673    0.555086   -0.030962    11.00000    0.02017    0.05293 =
         0.04032    0.00270   -0.00380    0.00659
N21   3    0.459823    0.306316   -0.012896    11.00000    0.02202    0.03107 =
         0.03186    0.00659    0.00544   -0.00021
N22   3    0.364365    0.431503   -0.030455    11.00000    0.02263    0.03705 =
         0.04128    0.00686    0.00593    0.00859
N23   3    0.348531    0.542912   -0.036784    11.00000    0.02128    0.04564 =
         0.04329   -0.00230   -0.00035    0.00365
AFIX  43
H23A  2    0.363827    0.605303   -0.044457    11.00000   -1.20000
AFIX   0
N24   3    0.293732    0.662902   -0.035330    11.00000    0.03313    0.06306 =
         0.05651   -0.00707   -0.00406    0.02063
AFIX 147
H24   2    0.312149    0.712637   -0.033150    11.00000   -1.50000
AFIX   0
N25   3    0.286440    0.459368   -0.022774    11.00000    0.02337    0.06111 =
         0.06716    0.00398   -0.00056    0.00823
AFIX  93
H25A  2    0.260604    0.466099   -0.020023    11.00000   -1.20000
H25B  2    0.297483    0.388946   -0.020077    11.00000   -1.20000
AFIX   0
HKLF    4
 
REM  shelxt_a.res in C2
REM R1 =  0.0814 for    6837 Fo > 4sig(Fo)  and  0.1027 for all    8673 data
REM    358 parameters refined using      1 restraints
 
END
 
WGHT      0.0608     15.9671
 
REM Highest difference peak  0.464,  deepest hole -0.348,  1-sigma level  0.076
Q1    1   0.2982  0.1805  0.0937  11.00000  0.05    0.46
Q2    1   0.1847  0.7622  0.3956  11.00000  0.05    0.45
Q3    1   0.4995  0.4768  0.3230  11.00000  0.05    0.40
Q4    1   0.2633  0.7496  0.3991  11.00000  0.05    0.36
Q5    1   0.2674  0.6665 -0.0347  11.00000  0.05    0.35
Q6    1   0.3284  0.4864  0.3653  11.00000  0.05    0.35
Q7    1   0.2723  0.2144  0.0202  11.00000  0.05    0.32
Q8    1   0.2769  0.7015 -0.0990  11.00000  0.05    0.32
Q9    1   0.3581  0.1033  0.3281  11.00000  0.05    0.31
Q10   1   0.5828  0.8841  0.3188  11.00000  0.05    0.31
Q11   1   0.6348  0.3465  0.3173  11.00000  0.05    0.30
Q12   1   0.2720  0.5077  0.3119  11.00000  0.05    0.29
Q13   1   0.3985  0.4045  0.4621  11.00000  0.05    0.28
Q14   1   0.3944  0.4192 -0.1771  11.00000  0.05    0.28
Q15   1   0.3709  0.8908  0.2273  11.00000  0.05    0.28
Q16   1   0.4724  0.3662 -0.0258  11.00000  0.05    0.28
Q17   1   0.4008  0.0495 -0.1431  11.00000  0.05    0.28
Q18   1   0.3930  0.1610  0.1277  11.00000  0.05    0.28
Q19   1   0.4422  0.4381  0.2164  11.00000  0.05    0.28
Q20   1   0.5650  0.5255  0.2413  11.00000  0.05    0.28
Q21   1   0.4275  0.0968  0.0791  11.00000  0.05    0.27
Q22   1   0.5233  0.1973  0.4562  11.00000  0.05    0.27
Q23   1   0.3593  0.5944  0.3954  11.00000  0.05    0.26
Q24   1   0.3654  0.3962  0.4018  11.00000  0.05    0.26
Q25   1   0.2735  0.4273  0.2974  11.00000  0.05    0.25
Q26   1   0.3638  0.7583  0.3399  11.00000  0.05    0.25
Q27   1   0.6251  0.4190  0.3191  11.00000  0.05    0.25
Q28   1   0.5686  0.0402  0.3511  11.00000  0.05    0.25
Q29   1   0.3871  0.4731  0.0965  11.00000  0.05    0.25
Q30   1   0.5338  0.3781  0.4403  11.00000  0.05    0.25
Q31   1   0.5063  0.2557  0.3397  11.00000  0.05    0.25
Q32   1   0.6585  0.6388  0.2630  11.00000  0.05    0.25
Q33   1   0.4217  0.1525 -0.1717  11.00000  0.05    0.25
Q34   1   0.4328  0.5094  0.4438  11.00000  0.05    0.25
Q35   1   0.3071  0.4232  0.3086  11.00000  0.05    0.25
Q36   1   0.2376  0.6307  0.2786  11.00000  0.05    0.25
Q37   1   0.4375  0.4196  0.4230  11.00000  0.05    0.25
Q38   1   0.5668  0.3600  0.4103  11.00000  0.05    0.25
Q39   1   0.1982  0.4160  0.0376  11.00000  0.05    0.25
Q40   1   0.4451  0.2609  0.3270  11.00000  0.05    0.25
Q41   1   0.5061 -0.0714  0.3507  11.00000  0.05    0.24
Q42   1   0.3933  0.6874  0.3408  11.00000  0.05    0.24
Q43   1   0.4343  0.3595  0.0622  11.00000  0.05    0.24
Q44   1   0.2346  0.5978  0.3330  11.00000  0.05    0.24
Q45   1   0.2773  0.7181  0.0457  11.00000  0.05    0.23
Q46   1   0.2975  0.5370  0.1598  11.00000  0.05    0.23
Q47   1   0.6416  0.6777  0.2843  11.00000  0.05    0.23
Q48   1   0.4144  0.4364  0.1603  11.00000  0.05    0.23
Q49   1   0.5760  0.4600  0.4213  11.00000  0.05    0.23
Q50   1   0.4518 -0.0040  0.3914  11.00000  0.05    0.23
;
_shelx_res_checksum   96086
 
_shelx_hkl_file
;
  -1  -3  -3  429.38   14.12   1 0.94849-0.97515 0.00772-0.19629-0.29178 0.07719
  13  -1   6   70.63    7.69   1 0.94879-0.66477 0.00813-0.07098-0.29086 0.72601
  27   9   6   15.39   16.18   1 0.94904-0.37131 0.00848 0.55707-0.29009 0.73286
  -1  -3  -5  383.76   14.74   1 0.94904-0.97951 0.00848-0.19706-0.29009-0.06722
   1  -5  -6   42.49    7.85   1 0.94919-0.93958 0.00868-0.32299-0.28963-0.13795
  18   6   6   31.42    9.79   2 0.94934-0.56038 0.00889 0.36814-0.28916 0.72699
  21   5   7   -3.10   10.63   2 0.94939-0.49566 0.00896 0.30525-0.28901 0.79986
  17   1   7   -3.25    9.13   2 0.94939-0.57958 0.00896 0.05389-0.28901 0.79768
  26  -4   8   15.04   13.53   2 0.94969-0.38920 0.00937-0.26072-0.28809 0.87300
  12   8   3   26.48    8.42   2 0.94979-0.69234 0.00950 0.49324-0.28778 0.50836
  10  -2   5  472.89   16.36   2 0.94979-0.73058 0.00950-0.13519-0.28778 0.64995
   9  -9  -8  -14.15   16.79   2 0.94984-0.77613 0.00957-0.57535-0.28762-0.27829
   5   5 -10    7.97    9.90   2 0.94999-0.86390 0.00978 0.30453-0.28716-0.42365
  17  -1   7  -11.52   10.33   2 0.94999-0.58015 0.00978-0.07261-0.28716 0.79580
  14   6   5   45.82    9.58   2 0.95009-0.64693 0.00991 0.36713-0.28685 0.65119
  -2   0  -4   35.29    4.87   2 0.95009-0.99960 0.00991-0.00991-0.28685 0.00036
   6  -8  -7   99.98   14.77   2 0.95023-0.83756 0.01012-0.51300-0.28639-0.20979
  30   0   9  -15.60   20.52   2 0.95038-0.30410 0.01032-0.01032-0.28593 0.94430
   0   0  -8   43.25   10.10   2 0.95048-0.96555 0.01046-0.01046-0.28562-0.28521
   1  -3  -8  113.40   13.49   2 0.95058-0.94474 0.01060-0.19919-0.28531-0.28499
  22   0   8   -5.25   13.55   2 0.95068-0.47408 0.01073-0.01073-0.28501 0.86770
  -1  -3  -4  204.50   10.71   2 0.95102-0.97956 0.01121-0.19978-0.28393-0.00202
  21   9   5   49.02   16.01   2 0.95126-0.50127 0.01155 0.55401-0.28316 0.65133
  27   5   8   17.44   22.15   2 0.95131-0.36985 0.01162 0.30257-0.28300 0.86846
   4  -6  -8   61.26   15.06   2 0.95156-0.88272 0.01196-0.38913-0.28223-0.28642
  18   8   5   69.09   14.98   2 0.95156-0.56447 0.01196 0.49074-0.28223 0.64873
   7  -9  -5   66.80   61.46   2 0.95180-0.81444 0.01231-0.57808-0.28146-0.07146
   7  -9  -3  103.33    9.52   2 0.95185-0.81071 0.01237-0.57812-0.28130 0.07111
   2  -6  -5  199.26   12.96   2 0.95199-0.91952 0.01258-0.38975-0.28084-0.07482
   0   4  -6  146.98    7.73   2 0.95204-0.96335 0.01265 0.23878-0.28069-0.14743
   7   5   3 1654.10   46.21   2 0.95209-0.79953 0.01272 0.30150-0.28053 0.49836
   6   4   3  138.70    9.38   2 0.95214-0.82058 0.01278 0.23860-0.28038 0.49768
  17   9   4  322.75   18.84   2 0.95214-0.58791 0.01278 0.55277-0.28038 0.57501
  25   7   7    0.40   19.98   2 0.95238-0.41470 0.01313 0.42671-0.27961 0.79257
   2  -6  -3  873.08   26.44   2 0.95247-0.91620 0.01326-0.39040-0.27930 0.06635
  30   2   9   -3.39   22.80   2 0.95271-0.30644 0.01361 0.11207-0.27852 0.93692
  -1   3  -5  355.34   12.33   2 0.95276-0.98315 0.01367 0.17489-0.27837-0.07893
   3  -1 -10   31.54   14.56   2 0.95286-0.90876 0.01381-0.07667-0.27806-0.43387
  20  10   4   70.15   14.68   2 0.95290-0.52576 0.01388 0.61453-0.27791 0.57420
  21  -5   7    5.74   10.78   2 0.95295-0.49922 0.01395-0.32814-0.27775 0.78859
   2  -4  -8   17.90   13.09   2 0.95300-0.92613 0.01402-0.26546-0.27760-0.29215
  23   3   8  -15.02   17.47   2 0.95300-0.45540 0.01402 0.17449-0.27760 0.86080
   0  -4  -5  762.75   24.92   2 0.95309-0.96256 0.01415-0.26559-0.27729-0.07947
   3  -5  -8   40.89   13.93   2 0.95324-0.90540 0.01436-0.32867-0.27682-0.29237
   1   3  -8  119.81   10.43   2 0.95324-0.94732 0.01436 0.17422-0.27682-0.29346
  29   1   9  -20.21   23.00   2 0.95328-0.32799 0.01443 0.04841-0.27667 0.93453
  22   2   8    5.83   16.01   2 0.95333-0.47673 0.01449 0.11118-0.27652 0.85921
   7  -9  -4   19.46    9.80   2 0.95343-0.81418 0.01463-0.58039-0.27621-0.00535
  10 -10  -6   11.97   15.53   2 0.95347-0.75501 0.01470-0.64332-0.27605-0.14658
  22   8   6   23.04   16.51   2 0.95357-0.48072 0.01484 0.48788-0.27574 0.71579
   5   5   2  244.38   10.57   2 0.95357-0.84484 0.01484 0.29939-0.27574 0.42114
  22   6   7  149.90   18.96   2 0.95362-0.47887 0.01490 0.36211-0.27559 0.78692
   3   1 -10   55.32   13.86   2 0.95366-0.90955 0.01497 0.04789-0.27543-0.43649
   5   7  -8   31.90    6.43   2 0.95376-0.86390 0.01511 0.42490-0.27512-0.29296
   1  -5  -5   42.95    9.13   2 0.95390-0.94240 0.01531-0.32962-0.27466-0.08155
   2  -2  -9   62.93   14.97   2 0.95390-0.92895 0.01531-0.14105-0.27466-0.36647
  29  -1   9  -10.70   21.13   2 0.95399-0.32871 0.01545-0.07829-0.27435 0.93225
   2  -6  -4   48.23    8.36   2 0.95399-0.91960 0.01545-0.39260-0.27435-0.00995
  30  -2   9   46.94   20.80   2 0.95404-0.30775 0.01552-0.14118-0.27420 0.93255
  24  10   5  -25.09   19.73   2 0.95409-0.44116 0.01559 0.61281-0.27404 0.64385
   8   8  -9   47.74    9.23   2 0.95409-0.80314 0.01559 0.48727-0.27404-0.36375
   2   6  -6  133.30    6.67   2 0.95409-0.92341 0.01559 0.36155-0.27404-0.15297
  15  11   1   81.96   11.05   2 0.95409-0.63742 0.01559 0.67566-0.27404 0.35357
   0  -4  -3  642.25   20.54   2 0.95423-0.95991 0.01579-0.26722-0.27358 0.05953
  24   4   8  185.76   21.37   2 0.95432-0.43576 0.01593 0.23541-0.27327 0.85703
  10 -10  -2   68.54    8.36   2 0.95446-0.74849 0.01613-0.64472-0.27280 0.13561
  14  10   2   65.13   10.76   2 0.95460-0.65706 0.01634 0.61209-0.27234 0.42267
   4   4   2 1312.11   36.17   2 0.95479-0.86706 0.01661 0.23477-0.27172 0.41658
  18  -6   6   34.01    7.90   2 0.95493-0.56602 0.01682-0.39387-0.27125 0.70915
  19   7   6   71.28   15.82   2 0.95502-0.54511 0.01695 0.42293-0.27095 0.70935
  27  -5   8   13.28   14.94   2 0.95502-0.37356 0.01695-0.33115-0.27095 0.85641
  22  -2   8   -6.06   13.49   2 0.95502-0.47843 0.01695-0.14263-0.27095 0.85365
  16   0   7 3279.76   89.91   2 0.95502-0.60616 0.01695-0.01695-0.27095 0.77903
  25   9   6   17.63   20.97   2 0.95512-0.41930 0.01709 0.54841-0.27064 0.71226
  17  11   2   36.26   11.77   2 0.95516-0.59467 0.01716 0.67408-0.27048 0.42244
   8   6   3  118.03    9.68   2 0.95516-0.78160 0.01716 0.35989-0.27048 0.48885
   1  -5  -3  852.55   25.57   2 0.95521-0.93993 0.01723-0.33152-0.27033 0.05683
  -1   3  -3  398.93   11.60   2 0.95521-0.98184 0.01723 0.17133-0.27033 0.05573
   8   4   4   69.28    9.44   2 0.95526-0.77987 0.01730 0.23408-0.27017 0.55991
   0  -2  -7   21.03    9.89   2 0.95526-0.96846 0.01730-0.14302-0.27017-0.22931
   9   1   5  187.56   11.47   2 0.95526-0.75700 0.01730 0.04555-0.27017 0.63178
  12  10   1   95.69    9.61   2 0.95526-0.70154 0.01730 0.61113-0.27017 0.34806
   1   5  -6   16.70    4.54   2 0.95530-0.94562 0.01736 0.29692-0.27002-0.15755
  14   8   4  103.60   12.51   2 0.95530-0.65398 0.01736 0.48534-0.27002 0.56299
  14   4   6   25.40   12.21   2 0.95535-0.65029 0.01743 0.23392-0.26986 0.70550
  15 -11   0   41.65    5.86   2 0.95539-0.64073 0.01750-0.70890-0.26971 0.27796
  -1  -1  -6 2679.76   72.87   2 0.95549-0.98778 0.01764-0.08050-0.26940-0.15927
  21   1   8   32.29   14.81   2 0.95549-0.49986 0.01764 0.04520-0.26940 0.85154
   0  -4  -4  310.32   13.51   2 0.95549-0.96308 0.01764-0.26907-0.26940-0.01600
  28   0   9   11.95   21.24   2 0.95549-0.35114 0.01764-0.01763-0.26940 0.92664
  23  -3   8    3.95   13.66   2 0.95558-0.45803 0.01777-0.20630-0.26909 0.85238
   9   5   4  534.00   19.85   2 0.95558-0.75920 0.01777 0.29644-0.26909 0.55936
  15   7   5   12.75   11.32   2 0.95562-0.63145 0.01784 0.42202-0.26893 0.63377
  28   6   8   -0.03   24.16   2 0.95576-0.35328 0.01805 0.35894-0.26847 0.85437
  12 -10   0   68.57    6.02   2 0.95581-0.70408 0.01812-0.64665-0.26831 0.27491
  17   3   7   13.77   12.75   2 0.95590-0.58603 0.01825 0.17026-0.26800 0.77659
  13   3   6   90.83   12.16   2 0.95595-0.67191 0.01832 0.17021-0.26785 0.70298
   2   2  -9   74.00   11.67   2 0.95595-0.93094 0.01832 0.10740-0.26785-0.37326
  12   0   6   45.49    9.92   2 0.95595-0.69288 0.01832-0.01832-0.26785 0.70243
   5  -7  -7  144.37   15.72   2 0.95604-0.86434 0.01846-0.45848-0.26754-0.22920
  18   4   7   61.30   14.31   2 0.95618-0.56537 0.01866 0.23270-0.26707 0.77626
   5   3   3 1416.05   39.48   2 0.95622-0.84566 0.01873 0.16981-0.26691 0.48368
   1  -5  -4  499.62   18.18   2 0.95627-0.94287 0.01880-0.33309-0.26676-0.01809
   6   6   2 1682.87   46.15   2 0.95640-0.82669 0.01900 0.35806-0.26629 0.41224
  21  -1   8   18.73   13.75   2 0.95645-0.50081 0.01907-0.08190-0.26614 0.84827
  13 -11  -2   25.63    8.53   2 0.95663-0.68768 0.01935-0.71076-0.26552 0.12997
  26 -10   5    3.05    8.63   2 0.95663-0.40179 0.01935-0.64780-0.26552 0.63650
  13  -7   4  273.72    9.50   2 0.95672-0.67647 0.01948-0.45941-0.26521 0.55771
  23  11   4   50.75   19.27   2 0.95677-0.46667 0.01955 0.67168-0.26505 0.56297
  15   5   6   -6.18   12.38   2 0.95681-0.63079 0.01962 0.29458-0.26490 0.70110
   9  -1   5  162.96    9.97   2 0.95695-0.75872 0.01982-0.08267-0.26443 0.62607
  25   5   8  -24.69   19.75   2 0.95704-0.41752 0.01996 0.29424-0.26412 0.84848
  -1   1  -6 2842.64   75.84   2 0.95708-0.98939 0.02003 0.04283-0.26397-0.16470
  10   8 -10   -1.02   12.46   2 0.95713-0.76609 0.02010 0.48276-0.26381-0.44424
  -1   3  -4  218.08    8.24   2 0.95722-0.98573 0.02023 0.16833-0.26350-0.02245
  28   2   9  -15.72   21.40   2 0.95740-0.35305 0.02051 0.10516-0.26288 0.92012
   3  -3  -9   59.15   13.91   2 0.95744-0.91151 0.02058-0.20917-0.26272-0.37786
   9  -9  -7    6.43   14.53   2 0.95749-0.78189 0.02064-0.58641-0.26257-0.23198
  27  -9   6   -8.71   11.12   2 0.95749-0.37979 0.02064-0.58624-0.26257 0.70542
  10 -10  -5  125.90   13.86   2 0.95758-0.75727 0.02078-0.64942-0.26226-0.08902
  16   2   7   -0.68   11.70   2 0.95762-0.60876 0.02085 0.10483-0.26210 0.77019
  16  10   3   33.37   10.80   2 0.95762-0.61623 0.02085 0.60754-0.26210 0.48485
   4  -2 -10   16.56   14.99   2 0.95767-0.89264 0.02092-0.14665-0.26195-0.44946
   2   4  -8   10.90    7.14   2 0.95771-0.93082 0.02099 0.23045-0.26179-0.30795
  29   3   9  -37.04   21.52   2 0.95785-0.33252 0.02119 0.16731-0.26133 0.91911
   7   3   4  668.75   21.57   2 0.95798-0.80356 0.02140 0.16714-0.26086 0.55004
  13  11   0   42.87    7.81   2 0.95798-0.68517 0.02140 0.66989-0.26086 0.26797
  19   5   7   49.86   11.15   2 0.95807-0.54626 0.02153 0.29266-0.26055 0.77026
   0   2  -7    6.28    6.06   2 0.95811-0.97133 0.02160 0.10412-0.26039-0.23909
  24  -4   8  138.27   14.84   2 0.95825-0.43973 0.02181-0.27317-0.25993 0.84378
  14  -6   5   41.11    6.54   2 0.95829-0.65519 0.02187-0.39895-0.25977 0.62416
  10   6   4  121.13    8.84   2 0.95834-0.74094 0.02194 0.35510-0.25962 0.55041
  27   1   9   30.38   15.41   2 0.95847-0.37513 0.02215 0.04070-0.25915 0.91594
   2   0  -9 5676.27  149.57   2 0.95851-0.93353 0.02222-0.02222-0.25899-0.38212
   5  -5  -9   49.40   12.40   3 0.95865-0.87076 0.02242-0.33675-0.25853-0.38096
   8  -6 -10   43.15   17.66   3 0.95869-0.80967 0.02249-0.39966-0.25837-0.45081
   4   6  -8   25.79    7.54   3 0.95869-0.88983 0.02249 0.35466-0.25837-0.31027
  12   2   6  103.49    9.39   3 0.95887-0.69582 0.02276 0.10293-0.25775 0.69235
  23   7   7   10.21   12.24   3 0.95887-0.46314 0.02276 0.41708-0.25775 0.76962
   4  -4  -9   65.39   11.52   3 0.95891-0.89203 0.02283-0.27430-0.25759-0.38245
  11   9   2   56.72    7.94   3 0.95895-0.72434 0.02290 0.54268-0.25744 0.40612
  13 -11  -5   10.06   13.79   3 0.95900-0.69573 0.02297-0.71446-0.25728-0.09234
  19  11   3   46.19   12.89   3 0.95913-0.55480 0.02317 0.66805-0.25682 0.48120
  26   8   7  -67.67   16.95   3 0.95922-0.40059 0.02331 0.47940-0.25650 0.77008
   1  -1  -8   97.88    9.75   3 0.95926-0.95341 0.02338-0.08624-0.25635-0.31396
  10 -10  -3  111.05   10.33   3 0.95930-0.75519 0.02344-0.65202-0.25619 0.04764
  28  -2   9   21.67   18.35   3 0.95939-0.35508 0.02358-0.14925-0.25588 0.91323
  27  -1   9   -9.20   17.93   3 0.95948-0.37614 0.02372-0.08655-0.25557 0.91235
   3   5  -8   14.11    7.10   3 0.95965-0.91178 0.02399 0.29030-0.25495-0.31425
   3   7  -5    1.32    2.81   3 0.95974-0.90619 0.02413 0.41585-0.25464-0.10047
  10 -10  -4  124.99   12.27   3 0.95978-0.75753 0.02420-0.65277-0.25448-0.02543
  17  -3   7    6.41   10.66   3 0.95978-0.58999 0.02420-0.21272-0.25448 0.76318
   1  -3  -7  139.18   12.39   3 0.95983-0.95205 0.02426-0.21285-0.25432-0.24461
   4  -6  -7   57.03   13.07   3 0.95983-0.88913 0.02426-0.40144-0.25432-0.24297
  25  -7   7   33.55   11.43   3 0.95987-0.42225 0.02433-0.46424-0.25417 0.76726
  16   6   6   13.25   11.63   3 0.95991-0.61293 0.02440 0.35265-0.25401 0.69079
   7   9  -1  129.24    6.41   3 0.96000-0.81495 0.02454 0.54108-0.25370 0.18618
  13   9   3  261.70   14.75   3 0.96004-0.68162 0.02461 0.54098-0.25355 0.47467
   4   2 -10   97.27   14.06   3 0.96004-0.89495 0.02461 0.10111-0.25355-0.45783
  11  11  -2   45.96    5.67   3 0.96021-0.73314 0.02488 0.66645-0.25292 0.11626
  19   9   5  -11.37   14.27   3 0.96021-0.55216 0.02488 0.54068-0.25292 0.61999
   5  -3 -10   89.37   17.12   3 0.96034-0.87436 0.02508-0.21370-0.25246-0.45842
  16  -2   7  -10.55   10.90   3 0.96039-0.61155 0.02515-0.15083-0.25230 0.76042
   9   7   3   73.96    8.48   3 0.96043-0.76593 0.02522 0.41469-0.25214 0.47109
  21   3   8   10.88   16.13   3 0.96047-0.50484 0.02529 0.16323-0.25199 0.83413
   6  -8  -2   23.59    6.41   3 0.96047-0.83842 0.02529-0.52815-0.25199 0.11260
  13  -3   6  113.98    9.56   3 0.96060-0.67656 0.02549-0.21401-0.25152 0.68665
  22  -6   7  188.80   13.69   3 0.96064-0.48593 0.02556-0.40260-0.25136 0.76276
   4   0   3  633.52   18.82   3 0.96069-0.87112 0.02563-0.02563-0.25121 0.46743
   1   1  -8   90.90   10.72   3 0.96081-0.95489 0.02583 0.03702-0.25074-0.31954
  26   6   8   26.70   22.75   3 0.96081-0.40032 0.02583 0.35120-0.25074 0.83564
   6   0   4   98.53    8.54   3 0.96090-0.82746 0.02597-0.02597-0.25043 0.53907
  13 -11  -3   25.34    9.97   3 0.96094-0.69387 0.02604-0.71746-0.25027 0.04337
  29  -3   9    9.22   19.52   3 0.96094-0.33564 0.02604-0.21454-0.25027 0.90813
   0   0  -7   -5.23    8.69   3 0.96103-0.97422 0.02618-0.02618-0.24996-0.24952
  10   4   5   78.38   11.65   3 0.96103-0.74176 0.02618 0.22519-0.24996 0.61209
   6  -8  -5   91.15   11.70   3 0.96103-0.84465 0.02618-0.52909-0.24996-0.10351
  26   0   9   73.53   20.22   3 0.96107-0.39867 0.02624-0.02624-0.24980 0.90597
  22   4   8   84.20   18.76   3 0.96111-0.48452 0.02631 0.22505-0.24965 0.83236
   6   8   0  316.39   11.14   3 0.96115-0.83521 0.02638 0.47639-0.24949 0.25277
  13 -11  -4   49.68   12.83   3 0.96120-0.69604 0.02645-0.71792-0.24934-0.02893
  20   6   7   79.93   17.39   3 0.96132-0.52854 0.02665 0.35037-0.24887 0.75913
  22  10   5   23.13   18.23   3 0.96137-0.49039 0.02672 0.60168-0.24871 0.61743
  20   2   8   30.34   15.66   3 0.96141-0.52676 0.02679 0.09889-0.24856 0.83016
  11   5   5  288.65   15.97   3 0.96141-0.72116 0.02679 0.28741-0.24856 0.61124
   3   3   2 3694.00   95.04   3 0.96141-0.89466 0.02679 0.16175-0.24856 0.39287
  15   1   7  322.55   18.17   3 0.96145-0.63359 0.02686 0.03599-0.24840 0.75598
  20   8   6   -7.27   14.87   3 0.96145-0.53055 0.02686 0.47586-0.24840 0.68735
   3   3  -9   47.04   10.85   3 0.96149-0.91548 0.02693 0.16165-0.24824-0.39230
   0   4  -5  627.30   18.61   3 0.96149-0.97092 0.02693 0.22450-0.24824-0.10851
  18  -4   7   84.83   11.15   3 0.96154-0.57074 0.02699-0.27836-0.24809 0.75731
  23   9   6   20.64   19.92   3 0.96158-0.46771 0.02706 0.53844-0.24793 0.68847
  14  -4   6   41.43    7.86   3 0.96162-0.65662 0.02713-0.27850-0.24778 0.68349
   3  -5  -7   65.92   31.13   3 0.96175-0.91206 0.02734-0.34166-0.24731-0.25054
   2  -4  -7   27.34   11.67   3 0.96183-0.93309 0.02747-0.27892-0.24700-0.25139
  -1  -1  -5  575.88   19.61   3 0.96187-0.99231 0.02754-0.09040-0.24684-0.11047
   7   7   2  236.96   10.97   3 0.96191-0.81125 0.02761 0.41231-0.24668 0.39319
   4   0 -10  -48.52   14.64   3 0.96191-0.89689 0.02761-0.02762-0.24668-0.46473
   9   9  -8   18.00    6.66   3 0.96200-0.78818 0.02775 0.53795-0.24637-0.31951
  10  10   0  128.32    8.34   3 0.96212-0.75225 0.02795 0.60050-0.24590 0.25137
  16   8   5  122.88   14.94   3 0.96212-0.61697 0.02795 0.47475-0.24590 0.61130
   7   7  -9  -23.58    8.88   3 0.96221-0.83224 0.02809 0.41191-0.24559-0.39275
  12  -2   6   65.39    9.07   3 0.96241-0.69936 0.02843-0.15411-0.24481 0.67941
   7  -7  -8   18.87   15.06   3 0.96246-0.83069 0.02850-0.46854-0.24465-0.32236
  27   3   9   81.83   23.65   3 0.96250-0.37912 0.02856 0.15994-0.24450 0.90119
  28  -6   8   32.08   15.93   3 0.96254-0.36011 0.02863-0.40567-0.24434 0.83038
  26   2   9   -1.57   20.63   3 0.96254-0.40014 0.02863 0.09704-0.24434 0.90051
   5  -7  -6   61.90   12.16   3 0.96258-0.86901 0.02870-0.46872-0.24418-0.18119
   9   9   1  277.48   12.00   3 0.96262-0.77187 0.02877 0.53684-0.24403 0.32029
   6   8  -7   64.96    5.91   3 0.96266-0.84992 0.02884 0.47400-0.24387-0.25230
  18  10   4  103.40   15.09   3 0.96270-0.57748 0.02891 0.59948-0.24372 0.53889
  11   7   4   29.20    9.62   3 0.96287-0.72448 0.02918 0.41070-0.24309 0.53443
   9   3   5    8.95    8.92   3 0.96303-0.76479 0.02945 0.15908-0.24247 0.60409
  25  -5   8   51.25   14.38   3 0.96307-0.42359 0.02952-0.34373-0.24231 0.82673
  15  -1   7  356.59   18.00   3 0.96307-0.63522 0.02952-0.09236-0.24231 0.74990
  23   5   8  208.43   22.04   3 0.96307-0.46549 0.02952 0.28467-0.24231 0.82555
  -1  -1  -2 1580.50   41.63   3 0.96307-0.98785 0.02952-0.09238-0.24231 0.09907
   0  -2  -6  301.87   14.56   3 0.96328-0.97459 0.02986-0.15558-0.24153-0.18659
   9  -9  -6   -7.57   13.07   3 0.96365-0.78618 0.03047-0.59624-0.24012-0.18307
  12   6   5  114.06   12.77   3 0.96373-0.70252 0.03061 0.34644-0.23981 0.60305
  28   4   9  193.39   27.07   3 0.96377-0.35945 0.03068 0.22068-0.23965 0.89698
   5  -7  -1   39.59    4.68   3 0.96377-0.86080 0.03068-0.47067-0.23965 0.17106
   6  -8  -4   24.51    9.88   3 0.96381-0.84548 0.03075-0.53361-0.23949-0.04261
  15   9   4  481.88   21.77   3 0.96385-0.64160 0.03082 0.53477-0.23934 0.53290
  25   1   9  -26.48   19.63   3 0.96401-0.42261 0.03109 0.03176-0.23871 0.89438
  19   1   8   12.05   13.78   3 0.96405-0.55038 0.03116 0.03169-0.23856 0.81962
   6  -8  -3   19.24    8.18   3 0.96413-0.84393 0.03129-0.53415-0.23824 0.02749
   9   7 -10   37.57   13.20   3 0.96413-0.79413 0.03129 0.40874-0.23824-0.47040
   6   2   4  378.69   15.52   3 0.96417-0.83072 0.03136 0.09433-0.23809 0.52671
  17   7   6   35.39   13.54   3 0.96421-0.59626 0.03143 0.40846-0.23793 0.67526
  11   1   6  133.68   11.69   3 0.96421-0.72209 0.03143 0.03142-0.23793 0.67194
  20  -2   8   33.16   12.66   3 0.96425-0.52962 0.03150-0.15717-0.23777 0.81940
   5   3 -10   49.64   12.67   3 0.96453-0.87850 0.03197 0.15661-0.23668-0.47418
  -1   1  -5  560.11   18.48   3 0.96461-0.99501 0.03211 0.03074-0.23636-0.12094
   3   5   1  573.54   17.19   3 0.96465-0.89980 0.03218 0.28206-0.23621 0.30919
   2  -2  -8   45.65   11.56   3 0.96465-0.93782 0.03218-0.15791-0.23621-0.33356
  21  11   4   11.90   18.03   3 0.96465-0.51649 0.03218 0.65903-0.23621 0.53302
  21  -3   8    5.19   12.88   3 0.96465-0.50903 0.03218-0.22069-0.23621 0.81837
  24   8   7   92.78   23.25   3 0.96473-0.44802 0.03232 0.47035-0.23589 0.74831
   8  -8  -7   90.11   16.35   3 0.96485-0.81021 0.03252-0.53541-0.23542-0.25967
   4   2   3  137.69    8.13   3 0.96489-0.87529 0.03259 0.09311-0.23527 0.45147
   4   4  -9  110.03   11.32   3 0.96497-0.89804 0.03272 0.21872-0.23495-0.40507
   3  -1  -9 1508.51   47.06   3 0.96509-0.91912 0.03293-0.09580-0.23448-0.40609
  26  -2   9  -17.84   18.68   3 0.96513-0.40278 0.03300-0.15867-0.23433 0.89059
   6  -4   3  100.18    4.87   3 0.96525-0.83374 0.03320-0.28459-0.23386 0.45118
   9  -9  -1  165.10    8.23   3 0.96533-0.77844 0.03334-0.59904-0.23354 0.16715
  25  -1   9   33.71   17.28   3 0.96533-0.42391 0.03334-0.09616-0.23354 0.88918
  19  -1   8    9.53   12.99   3 0.96560-0.55195 0.03381-0.09665-0.23245 0.81353
   8   0   5   -4.90    7.35   3 0.96560-0.78831 0.03381-0.03381-0.23245 0.59350
   4   6   1  211.98    8.72   3 0.96564-0.87978 0.03388 0.34319-0.23229 0.30581
  18  -8   5   52.90    6.81   3 0.96568-0.57866 0.03395-0.53671-0.23213 0.59872
   1   3  -7  148.12    9.53   3 0.96568-0.95792 0.03395 0.15462-0.23213-0.26681
  16   4   7  140.64   15.17   3 0.96572-0.61685 0.03402 0.21734-0.23198 0.74007
  15  -5   6   29.50    7.64   3 0.96576-0.63980 0.03409-0.34831-0.23182 0.66810
   6   6  -9  -10.23    8.49   3 0.96580-0.85684 0.03416 0.34299-0.23166-0.40724
  19  -5   7   28.65    9.62   3 0.96584-0.55407 0.03422-0.34843-0.23151 0.74128
  22  -8   6   11.03    8.16   3 0.96596-0.49314 0.03443-0.53718-0.23103 0.67114
   8  -4   4   59.03    5.07   3 0.96603-0.79067 0.03456-0.28595-0.23072 0.52048
   6  -6  -8   34.85   14.19   3 0.96603-0.85528 0.03456-0.41176-0.23072-0.33685
  24   6   8    0.98   17.39   3 0.96611-0.44753 0.03470 0.34231-0.23041 0.81416
  -1  -1  -4 1057.47   30.01   3 0.96623-0.99476 0.03491-0.09776-0.22994-0.05602
  15   3   7  133.48   11.83   3 0.96627-0.63836 0.03497 0.15354-0.22978 0.73730
  11  -1   6  129.82    9.15   3 0.96642-0.72436 0.03525-0.09809-0.22915 0.66322
   1   5  -5   51.93    4.60   3 0.96642-0.95484 0.03525 0.27903-0.22915-0.12706
  27  -3   9  123.57   18.43   3 0.96646-0.38314 0.03531-0.22383-0.22899 0.88583
   5   5  -9   49.46    8.88   3 0.96650-0.87855 0.03538 0.27892-0.22884-0.41063
   4  -6  -6   45.65    8.73   3 0.96661-0.89403 0.03559-0.41275-0.22837-0.19756
  17   5   7   53.33   10.85   3 0.96669-0.59680 0.03572 0.27846-0.22805 0.73664
   3   1  -9 1387.66   42.27   3 0.96681-0.92084 0.03593 0.02693-0.22758-0.41299
  12 -10  -6   73.35   13.22   3 0.96681-0.72642 0.03593-0.66459-0.22758-0.19397
   2   6  -5  191.08    7.32   3 0.96684-0.93427 0.03600 0.34113-0.22742-0.12823
   7  -3   4  655.91   19.48   3 0.96684-0.81244 0.03600-0.22453-0.22742 0.51662
  19  -7   6   51.60    8.45   3 0.96684-0.55695 0.03600-0.47589-0.22742 0.66587
  10   8   3   47.78    7.04   4 0.96688-0.75136 0.03606 0.46667-0.22727 0.44674
  24   0   9   53.77   13.27   4 0.96696-0.44652 0.03620-0.03619-0.22695 0.88205
  22  -4   8   14.49   11.66   4 0.96700-0.49042 0.03627-0.28762-0.22680 0.80954
  21  -9   5  -54.44   12.00   4 0.96711-0.51716 0.03647-0.60208-0.22633 0.59456
   6   4 -10   12.35   10.48   4 0.96734-0.86026 0.03688 0.21455-0.22538-0.48488
  14   0   7  539.38   21.06   4 0.96734-0.66045 0.03688-0.03688-0.22538 0.73241
  13   7   5    5.45    9.41   4 0.96745-0.68523 0.03709 0.40278-0.22491 0.58867
  25   3   9   33.03   15.51   4 0.96749-0.42611 0.03715 0.15137-0.22475 0.88046
   1  -3  -6  111.60    8.74   4 0.96749-0.95783 0.03715-0.22573-0.22475-0.20282
   8   6 -10   91.16   12.73   4 0.96749-0.81846 0.03715 0.34001-0.22475-0.48443
   8   2   5   46.93    6.85   4 0.96760-0.79034 0.03736 0.08833-0.22428 0.58536
   3  -3  -8   -1.14    8.44   4 0.96760-0.91975 0.03736-0.22595-0.22428-0.34492
   5  -7  -5   23.62    9.96   4 0.96760-0.87216 0.03736-0.47738-0.22428-0.12974
  -1  -1  -312253.30  308.97   4 0.96768-0.99432 0.03749-0.10035-0.22397 0.00937
  12   4   6  204.58   14.74   4 0.96783-0.70472 0.03777 0.21359-0.22334 0.65789
  24   2   9    9.54   17.66   4 0.96794-0.44750 0.03797 0.08771-0.22287 0.87796
  19   3   8   39.65   15.10   4 0.96798-0.55432 0.03804 0.15049-0.22271 0.80379
  20   4   8   19.21   15.84   4 0.96798-0.53333 0.03804 0.21332-0.22271 0.80432
   5  -3   3 1244.65   32.99   4 0.96802-0.85747 0.03811-0.22665-0.22255 0.43933
   5  -5  -8    6.82   13.29   4 0.96809-0.87828 0.03824-0.35256-0.22224-0.34587
  13   5   6    6.37   11.72   4 0.96816-0.68412 0.03838 0.27583-0.22193 0.65706
  21   9   6  -58.19   19.08   4 0.96820-0.51630 0.03845 0.52709-0.22177 0.66124
  15  11   2   21.07   10.42   4 0.96824-0.64971 0.03852 0.65274-0.22161 0.37249
   0   2  -6  308.01   12.75   4 0.96828-0.97960 0.03858 0.08713-0.22145-0.20667
   9  -9  -5   81.34   39.58   4 0.96835-0.78899 0.03872-0.60447-0.22114-0.13069
   7   5 -10   90.55   12.65   4 0.96835-0.84034 0.03872 0.27559-0.22114-0.48861
  18   0   8   -8.85   13.21   4 0.96842-0.57574 0.03886-0.03885-0.22082 0.80136
  12   8   4   49.64   10.69   4 0.96854-0.70923 0.03906 0.46369-0.22035 0.51228
  14   2   7  -13.44   11.85   4 0.96857-0.66167 0.03913 0.08656-0.22020 0.72721
   2   2  -8   11.82    9.47   4 0.96857-0.94173 0.03913 0.08659-0.22020-0.34957
   4  -4  -8   87.37   14.28   4 0.96865-0.89980 0.03926-0.29071-0.21988-0.34877
  20  10   5    4.48   16.93   4 0.96872-0.53969 0.03940 0.58900-0.21957 0.58719
   3  -5  -6   23.13   10.46   4 0.96879-0.91717 0.03954-0.35383-0.21925-0.20723
   8   8   2   69.94    7.83   4 0.96879-0.79713 0.03954 0.46322-0.21925 0.36630
   5   1 -10   68.11   13.84   4 0.96890-0.88284 0.03974 0.02311-0.21878-0.49206
   2   4   1 1489.65   39.42   4 0.96894-0.92508 0.03981 0.21159-0.21862 0.29106
   0   4  -4  242.39    8.31   4 0.96898-0.97649 0.03988 0.21154-0.21846-0.06694
  18   6   7  -14.38   15.20   4 0.96898-0.57814 0.03988 0.33715-0.21846 0.72763
  17   9   5   38.27   14.56   4 0.96901-0.60288 0.03994 0.52559-0.21831 0.58425
   1  -1  -7  423.38   17.96   4 0.96905-0.96126 0.04001-0.10288-0.21815-0.28078
   4  -2  -9   36.62   14.44   4 0.96905-0.90211 0.04001-0.16575-0.21815-0.42188
   2  -4  -6  158.34   12.03   4 0.96912-0.93854 0.04015-0.29160-0.21783-0.20920
   0  -2  -1  965.58   25.70   4 0.96916-0.97106 0.04022-0.16592-0.21768 0.14633
  18   8   6   81.06   15.94   4 0.96927-0.58031 0.04042 0.46229-0.21720 0.65505
  11   3   6  100.15   12.04   4 0.96934-0.72727 0.04056 0.14798-0.21689 0.65095
  17  11   3   30.16   12.77   4 0.96934-0.60699 0.04056 0.65070-0.21689 0.44020
  28  -4   9  138.72   20.68   4 0.96934-0.36501 0.04056-0.29189-0.21689 0.87420
  18   2   8   55.76   14.60   4 0.96941-0.57674 0.04069 0.08499-0.21657 0.79712
  24  10   6  -11.60   20.78   4 0.96952-0.45472 0.04090 0.58750-0.21610 0.65725
   0  -2  -5   50.06    8.42   4 0.96970-0.97913 0.04124-0.16695-0.21531-0.14145
  11  11  -1   79.67    6.67   4 0.96970-0.74074 0.04124 0.65007-0.21531 0.14999
  23   1   9   -1.46   16.83   4 0.96977-0.47034 0.04137 0.02147-0.21500 0.86961
   2   0  -8  162.26   13.07   4 0.96981-0.94295 0.04144-0.04145-0.21484-0.35492
  26  -6   8   60.98   14.99   4 0.96981-0.40932 0.04144-0.41847-0.21484 0.79977
  14  10   3   70.68   11.28   4 0.96988-0.67049 0.04158 0.58686-0.21453 0.43621
   0   0  -6 8463.86  216.70   4 0.96992-0.98126 0.04165-0.04165-0.21437-0.21376
  25   7   8   47.56   23.31   4 0.96995-0.43041 0.04171 0.39814-0.21421 0.79854
  14   6   6   -4.51   11.46   4 0.96999-0.66497 0.04178 0.33528-0.21405 0.64975
  27   5   9  169.12   26.82   4 0.97003-0.38667 0.04185 0.27234-0.21390 0.87066
   5   7   1   31.22    4.87   4 0.97006-0.86323 0.04192 0.39801-0.21374 0.28781
  12  10   2   72.99    9.76   4 0.97013-0.71456 0.04205 0.58639-0.21342 0.36267
   7  -7  -7   41.30   14.35   4 0.97013-0.83651 0.04205-0.48210-0.21342-0.28223
  -1   1  -4  845.99   24.41   4 0.97017-0.99870 0.04212 0.02073-0.21327-0.07269
   6  -2 -10   61.58   16.52   4 0.97042-0.86336 0.04260-0.16833-0.21216-0.49812
   9  -5   4  467.84   14.16   4 0.97042-0.77409 0.04260-0.35684-0.21216 0.50248
  22   8   7   30.35   19.38   4 0.97045-0.49573 0.04267 0.46005-0.21201 0.72339
  13  11   1   47.28    8.76   4 0.97049-0.69580 0.04273 0.64855-0.21185 0.29030
  -1   1  -2 1522.74   39.48   4 0.97059-0.99535 0.04294 0.01991-0.21137 0.06813
   7  -5   3 1440.53   37.32   4 0.97070-0.81821 0.04314-0.35738-0.21090 0.42878
  23  -7   7   -3.38    9.34   4 0.97070-0.47502 0.04314-0.48302-0.21090 0.72287
   2   4  -7   22.95    6.78   4 0.97077-0.94201 0.04328 0.20815-0.21059-0.28780
  23  11   5   29.09   20.28   4 0.97080-0.47884 0.04335 0.64788-0.21043 0.57969
  15 -11  -1   81.89   21.28   4 0.97080-0.65804 0.04335-0.73477-0.21043 0.14733
   5   7  -7  111.34    7.28   4 0.97101-0.87928 0.04375 0.39624-0.20948-0.28725
   5  -7  -4  320.01   14.83   4 0.97105-0.87371 0.04382-0.48382-0.20932-0.07334
  24  -2   9    7.89   16.53   4 0.97108-0.45068 0.04389-0.16956-0.20917 0.86434
  25  -9   6   29.81    8.95   4 0.97108-0.43535 0.04389-0.60950-0.20917 0.65094
   5  -3  -9  105.80   15.72   4 0.97108-0.88318 0.04389-0.23249-0.20917-0.43033
   8  -8  -6   -5.18   12.28   4 0.97108-0.81463 0.04389-0.54681-0.20917-0.21458
  23  -5   8  184.51   15.66   4 0.97122-0.47367 0.04416-0.35835-0.20853 0.79183
   5  -7  -2  111.52   10.48   4 0.97126-0.87017 0.04423-0.48423-0.20838 0.06843
  15 -11  -5   47.71   16.57   4 0.97126-0.66604 0.04423-0.73574-0.20838-0.14016
  23  -1   9    5.80   16.54   4 0.97136-0.47190 0.04443-0.10726-0.20790 0.86245
   9  -3   5   21.86    5.94   4 0.97140-0.77317 0.04450-0.23303-0.20775 0.56939
   6  -2   4  308.89   11.50   4 0.97140-0.83797 0.04450-0.17019-0.20775 0.49639
  12 -10  -5   48.01   13.55   4 0.97143-0.72910 0.04457-0.67316-0.20759-0.14259
  12 -10  -1   28.06    6.40   4 0.97143-0.72160 0.04457-0.67314-0.20759 0.14284
   1   1  -7  397.61   16.34   4 0.97147-0.96370 0.04464 0.01822-0.20743-0.29151
   2   0   2   31.37    4.89   4 0.97147-0.92572 0.04464-0.04463-0.20743 0.35121
   9  -9  -4   17.08   10.01   4 0.97154-0.79027 0.04477-0.61049-0.20711-0.07335
  22   6   8   89.39   19.41   4 0.97157-0.49497 0.04484 0.33219-0.20696 0.78967
   6  -4  -9   38.85   15.46   4 0.97160-0.86273 0.04491-0.29638-0.20680-0.43215
   9  -9  -2   46.75    7.84   4 0.97171-0.78671 0.04511-0.61084-0.20632 0.06858
  10   0   6   47.39    8.78   4 0.97184-0.75072 0.04538-0.04538-0.20569 0.63918
  10  -4   5   86.54    6.93   4 0.97184-0.75263 0.04538-0.29676-0.20569 0.56787
   4  -6  -5   59.66   10.46   4 0.97195-0.89746 0.04559-0.42274-0.20522-0.14935
   8  10  -2   89.45    4.92   4 0.97201-0.80789 0.04572 0.58276-0.20490 0.06660
  15  -7   5   14.92    5.00   4 0.97212-0.64803 0.04593-0.48584-0.20443 0.56937
  14   8   5   -7.21   11.78   4 0.97212-0.66891 0.04593 0.45677-0.20443 0.56874
  16  10   4   14.82   12.96   4 0.97215-0.62891 0.04600 0.58243-0.20427 0.49838
  25  -3   9    4.72   16.58   4 0.97218-0.43081 0.04606-0.23458-0.20411 0.85985
  19   7   7  -21.52   15.85   4 0.97222-0.56042 0.04613 0.39375-0.20396 0.71370
  17   1   8   20.78   13.68   4 0.97235-0.60066 0.04640 0.01644-0.20332 0.78333
  19  11   4  -11.42   15.42   4 0.97245-0.56627 0.04661 0.64464-0.20285 0.49859
  15  -3   7  147.59   12.30   4 0.97249-0.64464 0.04668-0.23520-0.20269 0.71029
  20  -6   7  151.58   12.30   4 0.97249-0.53975 0.04668-0.42373-0.20269 0.71303
   5  -7  -3  223.20   11.51   4 0.97259-0.87336 0.04688-0.48687-0.20222-0.00909
  23   3   9  161.38   21.48   4 0.97259-0.47316 0.04688 0.14165-0.20222 0.85683
  13   1   7  453.24   20.28   4 0.97262-0.68671 0.04695 0.01590-0.20206 0.70854
  10   2   6  149.42   11.66   4 0.97272-0.75158 0.04715 0.07854-0.20159 0.63505
  24   4   9  637.06   32.32   4 0.97286-0.45241 0.04742 0.20392-0.20095 0.85604
  14  -2   7   -1.93    9.85   4 0.97286-0.66595 0.04742-0.17309-0.20095 0.70796
  16  -6   6   27.91    7.11   4 0.97292-0.62599 0.04756-0.42463-0.20064 0.63747
   9  -9  -3   69.33    9.10   4 0.97292-0.78978 0.04756-0.61327-0.20064-0.00847
  22   0   9  -17.06   15.48   4 0.97292-0.49445 0.04756-0.04755-0.20064 0.85467
  15   7   6   45.32   12.86   4 0.97292-0.64686 0.04756 0.39230-0.20064 0.63681
   4   2  -9   50.92   11.24   4 0.97296-0.90602 0.04763 0.07809-0.20048-0.43955
  26  -8   7  -11.56   11.73   4 0.97309-0.41449 0.04790-0.55063-0.19985 0.71348
  18  -2   8   51.12   12.26   4 0.97316-0.58047 0.04803-0.17370-0.19953 0.78007
  -1   1  -311646.10  293.23   4 0.97319-0.99983 0.04810 0.01475-0.19937-0.01523
   8   8  -8   29.43    7.73   4 0.97342-0.82059 0.04858 0.45427-0.19826-0.36817
  22   2   9   13.30   14.53   4 0.97342-0.49492 0.04858 0.07710-0.19826 0.85226
  19  -3   8   49.00   11.41   4 0.97348-0.55981 0.04871-0.23722-0.19795 0.77901
   7   5   4   56.05    6.72   4 0.97352-0.81908 0.04878 0.26544-0.19779 0.48697
   3   5  -7   71.94    7.25   4 0.97352-0.92377 0.04878 0.26551-0.19779-0.30005
   4   0  -9  540.21   22.41   4 0.97358-0.90667 0.04892-0.04893-0.19747-0.44258
   5   1   4 1195.13   33.79   4 0.97362-0.86117 0.04898 0.01387-0.19731 0.48541
   7   9   0   29.51    5.43   4 0.97362-0.82669 0.04898 0.51663-0.19731 0.20114
   9  -7  -8  -14.59   11.13   4 0.97362-0.79992 0.04898-0.48905-0.19731-0.36862
   1  -3  -5  548.98   18.74   4 0.97362-0.96212 0.04898-0.23757-0.19731-0.15891
   0   4  -3  574.41   15.67   4 0.97362-0.97926 0.04898 0.20243-0.19731-0.01674
   2  -2  -7   31.42    7.55   4 0.97365-0.94495 0.04905-0.17479-0.19716-0.30125
   6  -6  -7  348.15   17.17   4 0.97371-0.86110 0.04919-0.42639-0.19684-0.29938
   8  -2   5   68.75    6.10   4 0.97375-0.79648 0.04926-0.17494-0.19668 0.55776
   2   2   2  563.99   16.60   4 0.97381-0.92805 0.04939 0.07630-0.19636 0.34014
  11   9   3  111.06    9.99   4 0.97381-0.73730 0.04939 0.51618-0.19636 0.41638
   4  -6  -1 3112.40   80.37   4 0.97384-0.89184 0.04946-0.42659-0.19621 0.12706
   4   6  -7   63.03    7.02   4 0.97384-0.90310 0.04946 0.32768-0.19621-0.30108
   6   2 -10   47.66   10.42   5 0.97404-0.86699 0.04987 0.07585-0.19526-0.51504
  16  -4   7  131.18   11.08   5 0.97404-0.62519 0.04987-0.30122-0.19526 0.70339
  25   5   9  215.13   21.11   5 0.97417-0.43278 0.05014 0.26406-0.19462 0.85033
   3   3  -8   14.73    7.01   5 0.97417-0.92629 0.05014 0.13843-0.19462-0.37458
   8   6   4  341.52   14.13   5 0.97423-0.79880 0.05027 0.32678-0.19431 0.48402
  17  -1   8   16.13    9.39   5 0.97429-0.60256 0.05041-0.11324-0.19399 0.77395
  15 -11  -4   98.93   13.57   5 0.97433-0.66721 0.05048-0.74195-0.19383-0.08334
  10  10   1  228.34   11.58   5 0.97436-0.76263 0.05054 0.57791-0.19367 0.27049
   3  -5  -5  901.94   28.12   5 0.97436-0.92088 0.05054-0.36485-0.19367-0.16145
   0  -2  -4 1600.67   43.84   5 0.97449-0.98203 0.05082-0.17653-0.19304-0.09237
   6   0 -10   62.49   13.16   5 0.97452-0.86747 0.05088-0.05089-0.19288-0.51741
   7   1   5   50.97    6.53   5 0.97458-0.81828 0.05102 0.01183-0.19256 0.55308
  12 -10  -4   26.54   10.88   5 0.97461-0.73041 0.05109-0.67968-0.19241-0.08641
  13   9   4  144.00   13.20   5 0.97461-0.69431 0.05109 0.51450-0.19241 0.48487
  11  -7  -9   31.03   18.38   5 0.97461-0.76086 0.05109-0.49118-0.19241-0.44383
  14   4   7   24.21   11.56   5 0.97464-0.66773 0.05116 0.20021-0.19225 0.69925
  23   7   8   17.60   19.04   5 0.97464-0.47705 0.05116 0.38871-0.19225 0.77549
  18   4   8   60.21   15.19   5 0.97464-0.58191 0.05116 0.20019-0.19225 0.77272
  19   9   6   12.65   15.12   5 0.97468-0.56470 0.05122 0.51429-0.19209 0.63045
  26  -4   9   -1.13   16.04   5 0.97471-0.41235 0.05129-0.30264-0.19193 0.84820
   6   4   4   29.24    7.52   5 0.97483-0.84139 0.05156 0.19982-0.19130 0.47994
  15   5   7  -19.60   12.68   5 0.97487-0.64698 0.05163 0.26257-0.19114 0.69869
  22  10   6    3.66   18.01   5 0.97487-0.50198 0.05163 0.57673-0.19114 0.63116
  13  -1   7  418.30   18.37   5 0.97493-0.68904 0.05177-0.11460-0.19082 0.69733
   2  -4  -5  219.20   12.01   5 0.97499-0.94246 0.05190-0.30333-0.19050-0.16516
   9   5   5  590.85   22.33   5 0.97499-0.77671 0.05190 0.26231-0.19050 0.55211
  17   3   8   18.82   14.45   5 0.97515-0.60340 0.05224 0.13628-0.18971 0.76965
   5   5   3  254.97   11.80   5 0.97524-0.86465 0.05244 0.26178-0.18924 0.40599
   3  -1  -8   33.43   11.18   5 0.97524-0.92741 0.05244-0.11532-0.18924-0.37998
   4  -2   3  174.82    7.06   5 0.97524-0.88567 0.05244-0.17814-0.18924 0.40546
  15 -11  -2   78.30   10.10   5 0.97527-0.66436 0.05251-0.74393-0.18908 0.05462
  19   5   8   23.48   15.83   5 0.97530-0.56162 0.05258 0.26162-0.18892 0.76998
  11  -9  -6   72.58   14.85   5 0.97543-0.75597 0.05285-0.61860-0.18828-0.23381
  20  -4   8   22.58   12.07   5 0.97546-0.54082 0.05292-0.30426-0.18813 0.76976
   6   6   3  309.71   13.28   5 0.97549-0.84392 0.05299 0.32409-0.18797 0.40527
  21   1   9    1.97   15.91   5 0.97549-0.51800 0.05299 0.00986-0.18797 0.84147
  23   9   7   22.66   21.97   5 0.97558-0.47986 0.05319 0.51234-0.18749 0.69940
   2   6  -1  291.15    8.52   5 0.97570-0.93559 0.05346 0.32364-0.18686 0.11660
  11  -5   5  307.83   11.53   5 0.97570-0.73552 0.05346-0.36768-0.18686 0.54960
  13   3   7  168.50   14.80   5 0.97577-0.68982 0.05360 0.13493-0.18654 0.69299
   8   4   5 3837.99  102.05   5 0.97580-0.79853 0.05366 0.19772-0.18638 0.54746
  12 -10  -2  182.89   10.84   5 0.97580-0.72784 0.05366-0.68223-0.18638 0.05028
   4  -6  -4  445.62   17.21   5 0.97580-0.89945 0.05366-0.43082-0.18638-0.09683
  18  10   5   23.15   14.85   5 0.97580-0.58868 0.05366 0.57470-0.18638 0.55288
  10   6   5  202.78   13.74   5 0.97583-0.75658 0.05373 0.32332-0.18622 0.54838
  15 -11  -3    7.15   10.65   5 0.97583-0.66683 0.05373-0.74520-0.18622-0.01959
   5  -5  -7   50.32   32.74   5 0.97586-0.88417 0.05380-0.36811-0.18606-0.31069
  10   8  -9    6.24    9.46   5 0.97589-0.78301 0.05387 0.44900-0.18591-0.45081
   3  -3  -7   98.67   12.29   5 0.97598-0.92629 0.05407-0.24267-0.18543-0.31243
   8  -8  -5    0.08   10.39   5 0.97601-0.81761 0.05414-0.55701-0.18527-0.16711
   9   9   2   55.94    8.08   5 0.97607-0.78345 0.05427 0.51134-0.18495 0.33256
  20   8   7   72.90   18.13   5 0.97607-0.54331 0.05427 0.44845-0.18495 0.69526
   6   8   1  545.74   17.60   5 0.97610-0.84827 0.05434 0.44842-0.18479 0.25941
   1   5  -4  436.60   12.66   5 0.97619-0.96274 0.05454 0.25972-0.18432-0.10054
  16   6   7  -35.35   14.87   5 0.97622-0.62732 0.05461 0.32241-0.18416 0.69222
  12 -10  -3   47.78   10.02   5 0.97625-0.73017 0.05468-0.68325-0.18400-0.02346
   1   3  -6  118.63    7.72   5 0.97628-0.96662 0.05475 0.13382-0.18384-0.24373
   7  -7  -6  130.88   13.59   5 0.97637-0.84085 0.05495-0.49498-0.18337-0.24093
   9   7   4   71.26    9.56   5 0.97652-0.78012 0.05529 0.38461-0.18257 0.47285
  21  11   5    4.11   18.35   5 0.97658-0.52655 0.05542 0.63578-0.18225 0.55041
   4  -4  -7  264.36   15.93   5 0.97661-0.90595 0.05549-0.30696-0.18210-0.31522
  16   8   6  -20.47   14.33   5 0.97664-0.62960 0.05556 0.44713-0.18194 0.61866
  16   0   8  -11.32   12.66   5 0.97667-0.62594 0.05563-0.05562-0.18178 0.76123
   0   2  -5   11.32    5.76   5 0.97679-0.98624 0.05590 0.06981-0.18114-0.17563
  16   2   8  -11.64   13.47   5 0.97691-0.62616 0.05617 0.06952-0.18051 0.75993
  20   6   8   -8.25   17.12   5 0.97691-0.54223 0.05617 0.32085-0.18051 0.76209
   8  -6  -8   36.66   15.68   5 0.97691-0.82420 0.05617-0.43337-0.18051-0.38598
  22  -2   9  -12.00   14.92   5 0.97697-0.49850 0.05631-0.18197-0.18019 0.83424
  24  -6   8   -5.76   12.46   5 0.97708-0.45856 0.05658-0.43362-0.17955 0.76342
   1  -1  -6 5052.40  131.93   5 0.97711-0.96748 0.05664-0.11951-0.17940-0.24819
  15   9   5   80.44   14.72   5 0.97720-0.65302 0.05685 0.50869-0.17892 0.54378
   0   0  -5   26.95    7.50   5 0.97726-0.98668 0.05698-0.05699-0.17860-0.17816
   5   3  -9  126.77   12.54   5 0.97729-0.88935 0.05705 0.13152-0.17844-0.46104
  21  -1   9   -6.11   15.23   5 0.97729-0.51979 0.05705-0.11988-0.17844 0.83194
  11  -3   6   63.04    8.24   5 0.97735-0.73528 0.05719-0.24571-0.17812 0.61219
   0  -2  -3   59.22    6.39   5 0.97737-0.98306 0.05725-0.18297-0.17796-0.03609
   4   4   3 1023.62   30.11   5 0.97743-0.88785 0.05739 0.19400-0.17765 0.39386
   0  -2  -2  711.87   20.58   5 0.97743-0.98122 0.05739-0.18310-0.17765 0.03495
   3   1   3 2846.47   74.07   5 0.97746-0.90885 0.05746 0.00539-0.17749 0.39315
  22   4   9  535.92   29.74   5 0.97749-0.49898 0.05752 0.19382-0.17733 0.83131
  11  11   0  114.95    8.31   5 0.97758-0.74672 0.05773 0.63357-0.17685 0.18287
   3   1  -8   63.07   10.42   5 0.97758-0.92975 0.05773 0.00513-0.17685-0.39237
  17  -5   7   77.10   10.04   5 0.97761-0.60781 0.05779-0.37201-0.17669 0.68540
   7   7   3   67.81    8.30   5 0.97761-0.82505 0.05779 0.38212-0.17669 0.39454
   7   3 -10   38.88   13.10   5 0.97761-0.84958 0.05779 0.13078-0.17669-0.53306
  21   3   9  458.65   26.44   5 0.97761-0.52008 0.05779 0.13072-0.17669 0.83015
   5  -1  -9  866.56   32.06   5 0.97769-0.88976 0.05800-0.12087-0.17622-0.46327
   4   4  -8   78.98    9.32   5 0.97781-0.90897 0.05827 0.19316-0.17558-0.39308
  23  -3   9  189.10   19.00   5 0.97786-0.47843 0.05840-0.24691-0.17526 0.82988
   5  -1   4 1148.13   32.21   5 0.97786-0.86541 0.05840-0.12124-0.17526 0.46336
   9   1   6   86.68   10.02   5 0.97792-0.77781 0.05854 0.00431-0.17494 0.60791
   7  -1 -10  109.65   16.53   5 0.97792-0.84991 0.05854-0.12141-0.17494-0.53482
  11   7   5  191.68   14.31   5 0.97792-0.73768 0.05854 0.38135-0.17494 0.53764
   7  -1   5   72.24    7.80   5 0.97798-0.82168 0.05867-0.12151-0.17463 0.53515
   4  -6  -3  241.03   11.41   5 0.97806-0.89983 0.05888-0.43602-0.17415-0.03771
   4  -6  -2    4.64    5.61   5 0.97815-0.89805 0.05908-0.43623-0.17367 0.03317
  12   0   7   72.38   11.57   5 0.97815-0.71318 0.05908-0.05907-0.17367 0.67958
  11   5   6   58.23   12.39   5 0.97818-0.73606 0.05915 0.25506-0.17351 0.60754
  24   8   8  -12.73   22.65   5 0.97820-0.45964 0.05921 0.44349-0.17335 0.75715
   8  10  -1   30.24    4.14   5 0.97820-0.81218 0.05921 0.56926-0.17335 0.10639
   1  -3  -4   90.03    8.90   5 0.97829-0.96487 0.05942-0.24799-0.17288-0.11198
  10  -2   6  122.10    9.68   5 0.97829-0.75719 0.05942-0.18510-0.17288 0.60639
  12   2   7   62.14   12.15   5 0.97829-0.71332 0.05942 0.06627-0.17288 0.67878
   4  -2  -8   20.07   11.94   5 0.97832-0.90946 0.05949-0.18521-0.17272-0.39594
  23   5   9  892.15   39.45   5 0.97832-0.47886 0.05949 0.25471-0.17272 0.82730
   7   7  -8   14.56    7.26   5 0.97834-0.84651 0.05955 0.38044-0.17256-0.39443
   5   3   4   93.19    8.93   5 0.97837-0.86590 0.05962 0.12892-0.17240 0.46049
   7   3   5  315.10   14.70   5 0.97837-0.82206 0.05962 0.12891-0.17240 0.53291
  12  -4   6  215.01   11.00   5 0.97843-0.71538 0.05976-0.31112-0.17208 0.60670
  17   7   7   44.71   15.50   5 0.97848-0.60862 0.05989 0.37998-0.17176 0.68039
   3  -5  -4  112.24    9.66   5 0.97851-0.92314 0.05996-0.37425-0.17160-0.11216
  27  -5   9  197.60   20.44   5 0.97854-0.39521 0.06003-0.37422-0.17144 0.82828
  15  11   3  -18.00   11.79   5 0.97862-0.65822 0.06023 0.63103-0.17097 0.39319
  10   4   6   90.65   11.69   5 0.97868-0.75756 0.06036 0.19101-0.17065 0.60415
  20   0   9   60.10   16.36   5 0.97868-0.54217 0.06036-0.06035-0.17065 0.82362
  20   2   9   52.79   16.93   5 0.97873-0.54219 0.06050 0.06519-0.17033 0.82324
  11   7 -10   10.20   14.30   5 0.97882-0.76683 0.06070 0.37931-0.16985-0.53768
   2   6  -4   24.56    2.55   5 0.97882-0.94436 0.06070 0.31642-0.16985-0.11445
  26   0  10   12.25   21.75   5 0.97892-0.41467 0.06097-0.06096-0.16921 0.89676
  12   6   6    9.56   10.89   5 0.97895-0.71589 0.06104 0.31602-0.16906 0.60365
   7  -5  -8   14.66   14.17   5 0.97895-0.84721 0.06104-0.37537-0.16906-0.39798
  26   2  10   18.39   22.92   5 0.97898-0.41474 0.06111 0.06458-0.16890 0.89648
   2   2  -7   69.00    8.69   5 0.97898-0.95024 0.06111 0.06460-0.16890-0.32950
  21  -5   8   78.84   11.81   5 0.97901-0.52342 0.06118-0.37538-0.16874 0.75097
  16 -10  -7   51.65   21.46   5 0.97903-0.65653 0.06124-0.68986-0.16858-0.32213
   2   0  -7   53.81    9.71   5 0.97906-0.95031 0.06131-0.06132-0.16842-0.32998
  21   7   8   -6.42   17.36   5 0.97925-0.52363 0.06178 0.37810-0.16730 0.74948
   2  -4  -4  335.94   13.27   5 0.97939-0.94499 0.06212-0.31356-0.16651-0.11781
  15  -9  -8   56.58   20.60   5 0.97944-0.67980 0.06226-0.62802-0.16619-0.39644
   3  -5  -1   49.89    5.00   5 0.97952-0.91850 0.06246-0.37673-0.16571 0.09601
   1   3   1  385.25   11.61   5 0.97955-0.95665 0.06253 0.12602-0.16555 0.23744
   1  -3  -1   24.02    3.68   5 0.97957-0.96051 0.06259-0.25116-0.16539 0.09460
   8  -8  -4  143.37   11.07   5 0.97960-0.81931 0.06266-0.56552-0.16523-0.11578
   0   2   0 3079.26   77.67   5 0.97963-0.97961 0.06273 0.06297-0.16507 0.16507
  17  11   4    2.93   11.74   5 0.97965-0.61538 0.06280 0.62842-0.16491 0.45954
  13  11   2   44.41    9.91   5 0.97971-0.70312 0.06293 0.62833-0.16459 0.31438
   5  -3  -8   10.36    8.87   5 0.97973-0.88990 0.06300-0.25159-0.16444-0.40367
   8  -2 -10   97.15   13.65   5 0.97979-0.83080 0.06313-0.18888-0.16412-0.54510
   3   7  -1   34.67    2.74   5 0.97979-0.91868 0.06313 0.37681-0.16412 0.09441
   5   1  -9  843.33   28.92   5 0.97981-0.89185 0.06320-0.00035-0.16396-0.47551
   9  -5  -9   33.07   12.75   6 0.97981-0.80798 0.06320-0.37754-0.16396-0.47335
  10   8   4   99.68    9.05   6 0.97981-0.76242 0.06320 0.43953-0.16396 0.45477
   8   4 -10   33.85   10.06   6 0.97984-0.83079 0.06327 0.18816-0.16380-0.54538
   7   1 -10    9.82    9.89   6 0.97984-0.85182 0.06327-0.00042-0.16380-0.54596
  15   1   8  121.47   11.99   6 0.97986-0.65012 0.06334-0.00049-0.16364 0.74255
  24   6   9   15.48   16.38   6 0.97986-0.45939 0.06334 0.31367-0.16364 0.81870
   6  -4  -8   -3.68    9.06   6 0.97989-0.86910 0.06340-0.31486-0.16348-0.40409
   6  -6  -6   88.48    9.77   6 0.97989-0.86537 0.06340-0.44058-0.16348-0.26137
   9   7  -9   26.05   10.03   6 0.97994-0.80806 0.06354 0.37647-0.16316-0.47411
   6  -2  -9  112.93   12.47   6 0.97997-0.87103 0.06361-0.18934-0.16300-0.47592
  24  -4   9  755.78   30.13   6 0.98000-0.45961 0.06367-0.31503-0.16284 0.81805
  11  -9  -5   67.74   11.36   6 0.98000-0.75867 0.06367-0.62942-0.16284-0.18789
  20  10   6   24.90   13.72   6 0.98002-0.54909 0.06374 0.56463-0.16268 0.60161
   6   4  -9   49.68    9.39   6 0.98005-0.87114 0.06381 0.18763-0.16252-0.47642
   6   6  -8   46.78    8.34   6 0.98005-0.86924 0.06381 0.31334-0.16252-0.40504
  21   9   7    2.12   16.42   6 0.98015-0.52635 0.06408 0.50143-0.16188 0.67266
   1   1  -6 4710.04  122.46   6 0.98023-0.97056 0.06428-0.00143-0.16141-0.26617
  10  -6   4  105.21    5.35   6 0.98023-0.76291 0.06428-0.44136-0.16141 0.45227
  10  -4 -10  410.66   22.70   6 0.98028-0.78930 0.06442-0.31587-0.16109-0.54701
   9  -7  -7  100.03   13.75   6 0.98031-0.80476 0.06448-0.50456-0.16093-0.33366
  25   1  10   20.67   20.33   6 0.98036-0.43710 0.06462-0.00177-0.16061 0.88766
   6   8  -6   43.33    4.73   6 0.98038-0.86577 0.06469 0.43815-0.16045-0.26437
  12  10   3   30.04    9.72   6 0.98046-0.72300 0.06489 0.56354-0.15997 0.38056
  14  10   4  306.45   17.13   6 0.98054-0.67923 0.06509 0.56332-0.15949 0.45250
   9   3   6   32.66    9.84   6 0.98056-0.78044 0.06516 0.12338-0.15933 0.59230
  10   6 -10  -37.73   13.71   6 0.98059-0.78960 0.06523 0.31193-0.15917-0.54892
  17   9   6   67.85   15.61   6 0.98069-0.61267 0.06550 0.50003-0.15853 0.59581
  13   7   6   53.48   12.54   6 0.98072-0.69668 0.06556 0.37434-0.15837 0.59353
  21  -7   7   63.48    9.80   6 0.98074-0.52703 0.06563-0.50552-0.15822 0.66911
   9  -1   6   94.00    9.17   6 0.98077-0.78062 0.06570-0.12853-0.15806 0.59100
  16   4   8   38.29   15.05   6 0.98079-0.63003 0.06577 0.18560-0.15790 0.73731
   8  -8  -1   64.53    5.95   6 0.98079-0.81489 0.06577-0.56862-0.15790 0.09095
   9   5 -10  205.88   16.20   6 0.98084-0.81080 0.06590 0.24838-0.15758-0.55105
  12   8   5  205.91   15.25   6 0.98087-0.71968 0.06597 0.43678-0.15742 0.52069
  19   1   9  110.19   17.24   6 0.98087-0.56530 0.06597-0.00312-0.15742 0.80980
   8   8   3   67.11    8.46   6 0.98092-0.80740 0.06610 0.43666-0.15710 0.37550
   7  -3  -9   64.47   14.63   6 0.98092-0.85104 0.06610-0.25471-0.15710-0.48130
   2  -2  -6  708.58   23.95   6 0.98092-0.95032 0.06610-0.19183-0.15710-0.26994
  17   5   8   46.18   15.51   6 0.98092-0.60916 0.06610 0.24809-0.15710 0.73704
   4   6   2 2554.59   67.59   6 0.98102-0.89328 0.06637 0.31070-0.15646 0.30133
  16  -2   8  -22.55   11.30   6 0.98112-0.63041 0.06664-0.19232-0.15582 0.73530
  14 -10  -5  -13.42   13.85   6 0.98117-0.69690 0.06678-0.69539-0.15550-0.19359
   3  -5  -3   36.80    7.07   6 0.98119-0.92394 0.06684-0.38113-0.15534-0.05706
   7  -7  -5   48.68   11.39   6 0.98124-0.84382 0.06698-0.50699-0.15502-0.19790
   1  -3  -3 1692.50   45.76   6 0.98139-0.96608 0.06738-0.25595-0.15406-0.05944
  17  -3   8   41.85   11.95   6 0.98141-0.60973 0.06745-0.25596-0.15390 0.73393
  10  -8  -6   -5.73   12.76   6 0.98141-0.78296 0.06745-0.57036-0.15390-0.26875
   7   5  -9   61.23   10.43   6 0.98146-0.85153 0.06759 0.24670-0.15359-0.48478
   8   6  -9    0.30    8.85   6 0.98151-0.83061 0.06772 0.30943-0.15327-0.48456
   9   9  -7   -3.33    5.38   6 0.98154-0.80586 0.06779 0.49791-0.15311-0.34143
   2   4  -6  163.00    8.58   6 0.98156-0.95088 0.06786 0.18356-0.15295-0.27407
   2  -4  -1 7667.73  193.60   6 0.98161-0.94155 0.06799-0.31940-0.15263 0.08238
  15   3   8   30.66   13.92   6 0.98163-0.65188 0.06806 0.12047-0.15247 0.73137
  13  -5   6   -1.47    6.33   6 0.98168-0.69768 0.06819-0.38241-0.15215 0.58734
  25   3  10  -15.79   22.89   6 0.98173-0.43848 0.06833 0.12020-0.15183 0.87888
   3   5   2  799.98   23.63   6 0.98178-0.91502 0.06846 0.24577-0.15151 0.29583
   8  -8  -3   40.22    8.69   6 0.98185-0.81973 0.06866-0.57155-0.15103-0.05863
  18   6   8   22.12   16.36   6 0.98190-0.58918 0.06880 0.30823-0.15071 0.73122
  20   4   9  311.97   23.35   6 0.98192-0.54540 0.06887 0.18250-0.15055 0.80351
  15  -1   8   92.91   12.79   6 0.98197-0.65223 0.06900-0.13183-0.15023 0.72914
  19  11   5    4.66   17.71   6 0.98197-0.57387 0.06900 0.62220-0.15023 0.51728
  25  -1  10   32.80   19.94   6 0.98199-0.43873 0.06907-0.13189-0.15007 0.87710
   5  -5  -6    6.26   10.70   6 0.98202-0.88844 0.06914-0.38344-0.14991-0.27548
  13   5   7   59.36   13.43   6 0.98202-0.69609 0.06914 0.24508-0.14991 0.65638
  22   8   8   35.57   24.42   6 0.98202-0.50538 0.06914 0.43355-0.14991 0.73259
  11   1   7   49.35   11.23   6 0.98204-0.73808 0.06920-0.00635-0.14975 0.65514
   3  -5  -2  454.29   15.45   6 0.98206-0.92294 0.06927-0.38356-0.14959 0.00854
   3   3   3  446.59   15.43   6 0.98211-0.91351 0.06940 0.11914-0.14927 0.36494
  17  -7   6   24.52    5.96   6 0.98216-0.61425 0.06954-0.50945-0.14895 0.58634
  16  10   5   14.44   13.34   6 0.98221-0.63710 0.06967 0.55875-0.14863 0.51409
  21   5   9  544.82   30.67   6 0.98230-0.52477 0.06994 0.24424-0.14799 0.80144
   5   7   2  240.19   10.52   6 0.98232-0.87360 0.07001 0.36991-0.14783 0.29325
  19   3   9   90.10   17.62   6 0.98232-0.56675 0.07001 0.11851-0.14783 0.80020
   2  -4  -3  385.48   14.50   6 0.98232-0.94607 0.07001-0.32145-0.14783-0.06513
  12   4   7   44.46   13.14   6 0.98232-0.71732 0.07001 0.18135-0.14783 0.65372
  24   2  10   45.94   22.27   6 0.98239-0.46008 0.07021 0.05547-0.14735 0.87380
   7   9   1   34.96    5.92   6 0.98239-0.83357 0.07021 0.49539-0.14735 0.22252
  20  -2   9   23.80   14.41   6 0.98244-0.54593 0.07035-0.19601-0.14703 0.80001
   1  -3  -2 3088.82   79.74   6 0.98256-0.96536 0.07068-0.25925-0.14623 0.00408
  24   0  10   15.85   20.62   6 0.98258-0.46030 0.07075-0.07074-0.14607 0.87259
   6   2   5  397.27   16.11   6 0.98260-0.84730 0.07082 0.05488-0.14591 0.50591
   8  -8  -2   45.28    6.80   6 0.98260-0.81857 0.07082-0.57367-0.14591 0.00761
  14   6   7   43.78   13.43   6 0.98262-0.67566 0.07089 0.30614-0.14575 0.65272
   3  -3  -6   43.79    9.85   6 0.98265-0.93102 0.07095-0.25953-0.14559-0.28089
  12  -6   5  103.70    6.43   6 0.98265-0.72149 0.07095-0.44802-0.14559 0.50889
   4   0  -8   24.58   10.46   6 0.98272-0.91386 0.07115-0.07116-0.14511-0.42354
  19  -1   9  101.32   15.91   6 0.98272-0.56716 0.07115-0.13397-0.14511 0.79751
  18  -6   7   25.50    8.64   6 0.98276-0.59197 0.07129-0.44833-0.14479 0.65403
  10  10   2   31.77    8.18   6 0.98276-0.76911 0.07129 0.55713-0.14479 0.29294
   4  -4  -6   63.52   10.18   6 0.98292-0.91033 0.07176-0.32321-0.14367-0.28227
  18  -4   8  100.70   12.41   6 0.98297-0.59030 0.07189-0.32325-0.14335 0.72393
   6   0   5  277.11   12.66   6 0.98297-0.84763 0.07189-0.07188-0.14335 0.50333
   4   2  -8   -6.37    9.36   6 0.98301-0.91414 0.07203 0.05368-0.14303-0.42562
   0   0  -4  229.82   10.44   6 0.98301-0.99058 0.07203-0.07204-0.14303-0.14238
  13  -3   7  155.87   11.86   6 0.98301-0.69708 0.07203-0.26054-0.14303 0.64951
  14   8   6   23.63   13.42   6 0.98312-0.67806 0.07236 0.43035-0.14223 0.57790
  21  -3   9  460.49   23.53   6 0.98315-0.52568 0.07243-0.26094-0.14207 0.79563
  12  -2   7   65.12   10.46   6 0.98315-0.71820 0.07243-0.19810-0.14207 0.64801
  25  -5   9  207.64   19.50   6 0.98317-0.44179 0.07250-0.38669-0.14191 0.79766
   3  -1  -7  349.16   16.60   6 0.98321-0.93351 0.07263-0.13551-0.14159-0.35627
   8   0 -10  103.95   16.58   6 0.98328-0.83431 0.07284-0.07285-0.14111-0.56812
   8  -6  -7   91.04   14.84   6 0.98330-0.82872 0.07290-0.45011-0.14095-0.35418
   3  -1   3 3056.61   78.68   6 0.98332-0.91473 0.07297-0.13581-0.14079 0.35647
  11  -9  -4   -6.11   10.25   6 0.98334-0.76015 0.07304-0.63878-0.14063-0.13874
  16  -8  -9  -69.83   29.84   6 0.98337-0.66467 0.07310-0.57606-0.14047-0.49301
  22   6   9  407.56   28.46   6 0.98337-0.50485 0.07310 0.30390-0.14047 0.79445
  14   2   8   82.96   13.96   6 0.98343-0.67466 0.07331 0.05239-0.13999 0.71836
   1  -1  -5   73.33    8.79   6 0.98352-0.97197 0.07357-0.13644-0.13935-0.21687
  19   7   8    6.98   17.10   6 0.98352-0.56984 0.07357 0.36630-0.13935 0.72043
  11   9   4   44.82   11.10   6 0.98354-0.74518 0.07364 0.49194-0.13919 0.43057
  23  -9   6    1.92    7.53   6 0.98354-0.48975 0.07364-0.63924-0.13919 0.57986
   8   2 -10   74.68   15.23   6 0.98356-0.83453 0.07371 0.05200-0.13903-0.57016
   2  -4  -2 2474.59   64.78   6 0.98356-0.94541 0.07371-0.32514-0.13903-0.00257
  18   2   9   -3.26   15.25   6 0.98358-0.58903 0.07378 0.05191-0.13887 0.79075
  13  -9  -6   75.35   15.63   6 0.98358-0.72222 0.07378-0.63958-0.13887-0.28215
   8  10   0  122.98    7.15   6 0.98361-0.81569 0.07384 0.55461-0.13871 0.14309
  11   3   7   67.82   12.51   6 0.98367-0.73966 0.07404 0.11448-0.13823 0.64358
  22  -6   8   86.89   12.39   6 0.98369-0.50712 0.07411-0.45115-0.13807 0.72084
   8   2   6  209.34   12.77   6 0.98371-0.80458 0.07418 0.05152-0.13791 0.57034
   0   2  -4 1572.68   42.12   6 0.98371-0.99124 0.07418 0.05153-0.13791-0.14750
  11  11   1   56.15    8.04   6 0.98371-0.75097 0.07418 0.61710-0.13791 0.21527
  14   0   8   62.15   12.94   6 0.98371-0.67491 0.07418-0.07416-0.13791 0.71624
   6   0  -9   70.97   13.95   6 0.98376-0.87487 0.07431-0.07433-0.13759-0.50136
   4   2   4 1337.50   38.01   6 0.98378-0.89231 0.07438 0.05132-0.13743 0.42499
  25  -7   8   12.18   12.76   6 0.98382-0.44434 0.07452-0.51442-0.13711 0.72156
  23   1  10  -20.73   20.26   6 0.98384-0.48252 0.07458-0.01173-0.13695 0.86288
  18   0   9  -33.76   14.36   6 0.98384-0.58926 0.07458-0.07456-0.13695 0.78879
  16 -10  -6   61.18   17.98   6 0.98386-0.65951 0.07465-0.70328-0.13679-0.28257
  15   7   7    8.59   12.78   6 0.98401-0.65612 0.07512 0.36477-0.13567 0.64324
   3   3  -7  113.95    8.98   6 0.98403-0.93429 0.07519 0.11338-0.13551-0.36234
  14  -8  -8   53.08   18.63   6 0.98408-0.70549 0.07532-0.57829-0.13519-0.42804
   6   2  -9  139.25   13.09   6 0.98410-0.87518 0.07539 0.05032-0.13503-0.50391
   8   0   6  216.15   11.52   6 0.98412-0.80494 0.07546-0.07544-0.13487 0.56727
  13   9   5   86.27   12.22   6 0.98416-0.70196 0.07559 0.48998-0.13455 0.49834
  14  -4   7   57.14    8.67   6 0.98424-0.67734 0.07586-0.32721-0.13391 0.64094
  12  -6  -9   27.23   14.50   6 0.98428-0.74948 0.07599-0.45318-0.13359-0.50206
  14 -10  -4   15.51   10.73   6 0.98433-0.69817 0.07613-0.70472-0.13326-0.14446
  19   9   7   65.85   14.72   6 0.98437-0.57254 0.07626 0.48928-0.13294 0.64267
  11   9  -8    0.50    8.23   6 0.98439-0.76861 0.07633 0.48936-0.13278-0.43200
   4   0   4 3524.28   91.48   6 0.98443-0.89298 0.07646-0.07646-0.13246 0.42003
  11  -1   7   69.33    8.14   6 0.98443-0.74048 0.07646-0.13930-0.13246 0.63787
  10  -6  -8    2.36   10.98   6 0.98447-0.78977 0.07660-0.45379-0.13214-0.43325
   3   5  -6   23.60    5.55   7 0.98457-0.93292 0.07693 0.23734-0.13134-0.29513
   6  -6  -5   38.58    7.72   7 0.98461-0.86819 0.07707-0.45423-0.13102-0.22246
  18 -10  -7  -10.26   18.24   7 0.98461-0.62019 0.07707-0.70573-0.13102-0.35862
   9   9   3   54.87    7.92   7 0.98465-0.79010 0.07720 0.48838-0.13070 0.34963
  18  10   6   16.94   14.13   7 0.98465-0.59565 0.07720 0.55116-0.13070 0.56853
  24   4  10   53.79   17.85   7 0.98467-0.46238 0.07727 0.17410-0.13054 0.85702
  17  -9  -8   81.81   23.25   7 0.98477-0.64320 0.07760-0.64340-0.12974-0.43182
   1   3  -5  470.85   15.16   7 0.98479-0.97325 0.07767 0.11089-0.12958-0.22664
  22  -4   9  500.78   23.81   7 0.98481-0.50637 0.07774-0.32909-0.12942 0.78352
  23   3  10   30.01   17.24   7 0.98481-0.48349 0.07774 0.11079-0.12942 0.85535
   7  -7  -4  255.34   13.17   7 0.98483-0.84553 0.07780-0.51781-0.12926-0.15231
  15  -9  -7  -11.42   15.95   7 0.98485-0.68340 0.07787-0.64369-0.12910-0.36220
   5   7  -6   28.28    4.77   7 0.98487-0.89123 0.07794 0.36204-0.12894-0.29643
   6   8   2   17.08    5.94   7 0.98491-0.85521 0.07807 0.42469-0.12862 0.27458
   2   4   2 2023.91   53.55   7 0.98499-0.93924 0.07834 0.17305-0.12797 0.27176
   7  -5  -7  946.73   32.55   7 0.98515-0.85153 0.07888-0.39321-0.12669-0.36899
   9  -1 -10   60.03   16.91   7 0.98522-0.81523 0.07914-0.14202-0.12605-0.58261
   8   6   5  305.92   15.64   7 0.98522-0.80792 0.07914 0.29791-0.12605 0.48711
  17 -11  -3  -23.26   12.01   7 0.98522-0.63427 0.07914-0.77062-0.12605-0.07868
   7   5   5 2226.21   62.12   7 0.98532-0.82898 0.07948 0.23474-0.12525 0.48576
   4  -2  -7   79.64   11.93   7 0.98532-0.91466 0.07948-0.20522-0.12525-0.37208
   9  -7  -6   -2.46   11.75   7 0.98540-0.80794 0.07975-0.51980-0.12460-0.29861
  23  -1  10  -34.30   19.13   7 0.98541-0.48408 0.07981-0.14263-0.12444 0.85035
   5  -1  -8  110.82   12.36   7 0.98549-0.89571 0.08008-0.14296-0.12380-0.44434
  20   8   8   38.54   20.60   7 0.98553-0.55086 0.08022 0.42249-0.12348 0.70509
  11  -9  -3  166.77   11.30   7 0.98557-0.76049 0.08035-0.64609-0.12316-0.08486
  17   1   9   18.78   14.98   7 0.98558-0.61202 0.08042-0.01756-0.12300 0.77436
  10  -8  -5    5.63   10.83   7 0.98558-0.78523 0.08042-0.58330-0.12300-0.22829
  24  -2  10    0.12   19.33   7 0.98558-0.46329 0.08042-0.20607-0.12300 0.84949
  22   2  10   61.75   21.72   7 0.98560-0.50527 0.08048 0.04521-0.12284 0.84825
  19  -5   8   11.19   10.25   7 0.98562-0.57199 0.08055-0.39475-0.12268 0.70381
  17 -11  -1   83.67   18.24   7 0.98564-0.63090 0.08062-0.77203-0.12252 0.06051
   4   6  -6   28.51    4.94   7 0.98571-0.91307 0.08089 0.29624-0.12188-0.30405
   3   1  -7  372.92   16.05   7 0.98571-0.93598 0.08089-0.01804-0.12188-0.37598
  15  11   4    7.86   12.86   7 0.98573-0.66347 0.08095 0.61032-0.12171 0.41529
  15   5   8   31.32   14.43   7 0.98575-0.65598 0.08102 0.23319-0.12155 0.70044
   2   6   0  302.26    9.56   7 0.98577-0.94377 0.08109 0.29601-0.12139 0.12249
  15   9   6   26.03   14.87   7 0.98583-0.65979 0.08129 0.48427-0.12091 0.55713
  18   4   9   -6.95   17.13   7 0.98584-0.59126 0.08135 0.17001-0.12075 0.77261
  16   8   7  127.04   17.23   7 0.98586-0.63697 0.08142 0.42129-0.12059 0.62869
   4   8  -1  113.33    4.82   7 0.98586-0.90377 0.08142 0.42137-0.12059 0.05144
   6   6   4  477.68   18.17   7 0.98590-0.85241 0.08155 0.29550-0.12027 0.40890
  19   5   9  -12.56   18.60   7 0.98592-0.57039 0.08162 0.23259-0.12011 0.77255
  22   0  10   23.65   19.38   7 0.98593-0.50561 0.08169-0.08167-0.11995 0.84536
  10   2   7   33.35   10.97   7 0.98593-0.76294 0.08169 0.04401-0.11995 0.62478
   7  -1  -9  211.29   18.02   7 0.98593-0.85607 0.08169-0.14457-0.11995-0.51847
  14   4   8  120.28   16.01   7 0.98595-0.67712 0.08176 0.16960-0.11979 0.69809
   9   5   6    0.71   10.84   7 0.98599-0.78582 0.08189 0.23232-0.11947 0.55240
   9   3 -10   58.34   14.18   7 0.98601-0.81598 0.08196 0.10661-0.11931-0.58933
  13   1   8   54.35   13.10   7 0.98601-0.69821 0.08196-0.01910-0.11931 0.69712
   9   7   5   76.74   11.42   7 0.98604-0.78777 0.08209 0.35781-0.11898 0.48060
  10   6   6   51.17   11.66   7 0.98604-0.76488 0.08209 0.29495-0.11898 0.55246
   6  -4  -7   57.99   12.06   7 0.98606-0.87344 0.08216-0.33363-0.11882-0.37741
   2   0  -620560.10  519.04   7 0.98608-0.95545 0.08222-0.08223-0.11866-0.30838
  13  11   3  118.16   12.69   7 0.98610-0.70765 0.08229 0.60898-0.11850 0.33964
  17 -11  -2   53.21   10.27   7 0.98615-0.63329 0.08249-0.77392-0.11802-0.01534
   5  -3  -7  228.04   14.72   7 0.98615-0.89451 0.08249-0.27110-0.11802-0.37876
   9  -5  -8   50.05   15.00   7 0.98617-0.81249 0.08256-0.39691-0.11786-0.44811
  16   6   8    5.82   14.79   7 0.98620-0.63544 0.08269 0.29435-0.11754 0.69696
   5   5   4  241.82   12.25   7 0.98629-0.87379 0.08303 0.23119-0.11674 0.40482
   3   7   0   18.67    3.04   7 0.98634-0.92334 0.08323 0.35671-0.11625 0.11789
  11  -9  -1   11.85    5.83   7 0.98636-0.75751 0.08329-0.64900-0.11609 0.05079
  14 -10  -3   32.11   10.77   7 0.98640-0.69839 0.08343-0.71205-0.11577-0.09060
   2  -2  -5  618.77   21.13   7 0.98641-0.95390 0.08349-0.20922-0.11561-0.24007
  17   3   9   37.89   16.15   7 0.98641-0.61281 0.08349 0.10503-0.11561 0.76691
  10   0   7  255.32   14.42   7 0.98643-0.76342 0.08356-0.08355-0.11545 0.62027
  25  -3  10  -24.34   19.67   7 0.98647-0.44321 0.08369-0.27220-0.11513 0.84220
   6   4   5  420.51   17.61   7 0.98648-0.85117 0.08376 0.16762-0.11497 0.47496
   5   3  -8   42.94    9.29   7 0.98652-0.89667 0.08389 0.10467-0.11465-0.45346
  14  -6   6    7.40    5.92   7 0.98653-0.68156 0.08396-0.46103-0.11449 0.55023
  20   6   9  336.26   25.91   7 0.98653-0.54998 0.08396 0.29306-0.11449 0.76741
   7   7   4  275.75   13.83   7 0.98655-0.83209 0.08403 0.35587-0.11433 0.40350
  17  11   5   13.83   16.46   7 0.98659-0.62049 0.08416 0.60709-0.11400 0.48001
   5  -5  -5  599.43   21.48   7 0.98660-0.89113 0.08423-0.39852-0.11384-0.24018
  11  -9  -2  145.88    9.74   7 0.98667-0.75972 0.08450-0.65023-0.11320-0.02346
  15  -5   7   36.72    8.28   7 0.98672-0.65887 0.08470-0.39890-0.11272 0.62032
   2   2  -6  691.51   22.17   7 0.98679-0.95615 0.08496 0.04074-0.11208-0.31496
   8   4   6  313.31   16.24   7 0.98679-0.80758 0.08496 0.16641-0.11208 0.54446
  11   7   6    6.18   11.34   7 0.98684-0.74471 0.08516 0.35472-0.11159 0.54563
   6  -2  -8  133.80   13.82   7 0.98687-0.87608 0.08530-0.21103-0.11127-0.45631
   3  -3   2 3704.62   93.42   7 0.98687-0.92018 0.08530-0.27384-0.11127 0.25561
  13   3   8    9.39   12.96   7 0.98687-0.69904 0.08530 0.10323-0.11127 0.68905
   7   3  -9   -2.14   10.69   7 0.98687-0.85699 0.08530 0.10328-0.11127-0.52714
   1   1  -5   45.33    7.36   7 0.98689-0.97532 0.08536-0.02251-0.11111-0.24511
   9   1 -10   50.50   14.83   7 0.98689-0.81689 0.08536-0.02252-0.11111-0.59754
  11  -7  -7   64.91   14.37   7 0.98695-0.76936 0.08563-0.52566-0.11047-0.38300
  21   1  10   19.44   19.56   7 0.98697-0.52757 0.08570-0.02284-0.11031 0.83510
   8  -2  -9   22.87   14.65   7 0.98700-0.83610 0.08583-0.21157-0.10998-0.52785
  18  -2   9   19.80   13.89   7 0.98703-0.59246 0.08596-0.21162-0.10966 0.76153
   8  -4  -8   37.52   13.67   7 0.98708-0.83439 0.08617-0.33765-0.10918-0.45733
  12  10   4  133.80   12.68   7 0.98712-0.72780 0.08630 0.54214-0.10886 0.40080
   4   4  -7  209.36   10.93   7 0.98713-0.91637 0.08637 0.16505-0.10870-0.38859
  17   7   8  -27.64   16.90   7 0.98718-0.61545 0.08657 0.35331-0.10822 0.68820
  23  -5   9  912.79   33.51   7 0.98723-0.48781 0.08677-0.40096-0.10773 0.76239
   8   8  -7   49.81    6.24   7 0.98723-0.83255 0.08677 0.41608-0.10773-0.38736
  17  -1   9  -33.20   14.09   7 0.98724-0.61367 0.08683-0.14966-0.10757 0.75892
   7  -7  -3 1176.65   34.45   7 0.98726-0.84609 0.08690-0.52691-0.10741-0.10280
  13  -9  -5   43.51   13.51   7 0.98726-0.72398 0.08690-0.65266-0.10741-0.24224
  22   4  10   -6.19   22.28   7 0.98727-0.50691 0.08697 0.16439-0.10725 0.83262
  20  10   7   32.95   20.32   7 0.98729-0.55447 0.08703 0.54133-0.10709 0.61735
  16  -8   5  107.32    6.24   7 0.98729-0.64223 0.08703-0.58980-0.10709 0.47259
   7  -3  -8  169.08   15.48   7 0.98732-0.85560 0.08717-0.27578-0.10677-0.46029
  14  -2   8   22.11   10.79   7 0.98734-0.67858 0.08723-0.21290-0.10661 0.68499
  14  10   5   57.81   13.61   7 0.98734-0.68412 0.08723 0.54115-0.10661 0.47093
  14 -10  -1  138.30    9.08   7 0.98735-0.69556 0.08730-0.71587-0.10645 0.04279
  16 -10  -5  227.18   18.05   7 0.98735-0.66114 0.08730-0.71594-0.10645-0.24156
  10   4 -10  412.00   20.88   7 0.98746-0.79646 0.08777 0.16366-0.10532-0.60277
  14 -10  -2  239.43   12.73   7 0.98748-0.69757 0.08783-0.71642-0.10516-0.02985
  10   8   5   60.58   11.31   7 0.98748-0.76819 0.08783 0.41489-0.10516 0.46731
   5   1  -8  121.01   11.76   7 0.98751-0.89768 0.08797-0.02512-0.10484-0.46328
   3  -3  -5  324.65   14.52   7 0.98752-0.93401 0.08803-0.27661-0.10468-0.25045
   4  -4  -5  335.50   14.95   7 0.98752-0.91304 0.08803-0.33947-0.10468-0.24990
  19  -3   9   83.80   13.81   7 0.98754-0.57201 0.08810-0.27660-0.10452 0.75696
   7   1   6   61.69    9.17   7 0.98755-0.82937 0.08817-0.02531-0.10435 0.53622
  11   5   7  135.22   13.74   7 0.98757-0.74361 0.08823 0.22599-0.10419 0.60959
  21   3  10   40.82   20.09   7 0.98757-0.52821 0.08823 0.10030-0.10419 0.82905
   5   1   5  253.30   12.05   7 0.98757-0.87322 0.08823-0.02538-0.10419 0.46363
  15  -3   8   16.39   10.92   7 0.98758-0.65785 0.08830-0.27681-0.10403 0.68297
  21   7   9  -22.02   21.10   7 0.98758-0.53006 0.08830 0.35156-0.10403 0.75751
  16   2   9    4.72   13.22   7 0.98758-0.63494 0.08830 0.03739-0.10403 0.75477
  12   6   7   69.00   12.13   7 0.98767-0.72271 0.08870 0.28835-0.10307 0.60899
   7   1  -9  188.73   15.17   7 0.98770-0.85778 0.08883-0.02599-0.10274-0.53564
   8  10   1   86.75    7.67   7 0.98772-0.81791 0.08890 0.53954-0.10258 0.17830
   4   4   4   68.42    6.54   7 0.98781-0.89630 0.08930 0.16208-0.10162 0.38916
  13  -1   8   -8.18    8.18   7 0.98784-0.70004 0.08943-0.15226-0.10130 0.67912
  12  -8  -6   42.82   11.24   7 0.98784-0.74742 0.08943-0.59235-0.10130-0.32027
   7   9   2   34.76    6.77   7 0.98788-0.83720 0.08963 0.47598-0.10081 0.24733
  17   9   7  129.43   15.81   7 0.98790-0.61806 0.08970 0.47588-0.10065 0.60933
   8  -6  -6  100.64   10.15   7 0.98790-0.83137 0.08970-0.46686-0.10065-0.32309
   8   8   4  165.48   10.14   7 0.98792-0.81251 0.08983 0.41292-0.10033 0.39007
   6  -6  -4  518.72   18.23   7 0.98797-0.86964 0.09003-0.46718-0.09985-0.18227
  16   0   9  -12.75    9.80   8 0.98803-0.63541 0.09030-0.09028-0.09920 0.74998
  11  11   2   57.46    9.25   8 0.98807-0.75344 0.09050 0.60077-0.09872 0.24742
  19  11   6   21.56   16.02   8 0.98808-0.57812 0.09056 0.60064-0.09856 0.53696
  10   4   7  120.45   11.06   8 0.98810-0.76512 0.09063 0.16075-0.09840 0.60326
   1   1   2 1463.50   38.56   8 0.98811-0.96335 0.09070-0.02785-0.09824 0.24148
   2   2   3  187.52    7.96   8 0.98811-0.94046 0.09070 0.03500-0.09824 0.31336
  10  10   3   62.66    9.12   8 0.98814-0.77261 0.09083 0.53759-0.09792 0.31740
  11   5 -10  336.55   18.61   8 0.98814-0.77620 0.09083 0.22347-0.09792-0.60967
  12   6 -10   51.80   14.73   8 0.98815-0.75520 0.09090 0.28626-0.09775-0.60925
   1  -1  -4 1238.88   34.49   8 0.98817-0.97476 0.09096-0.15383-0.09759-0.18728
  16  -8  -8  139.04   20.89   8 0.98826-0.66766 0.09143-0.59435-0.09647-0.46563
   7  -3   5  331.29   12.31   8 0.98826-0.83200 0.09143-0.27996-0.09647 0.45702
  10   8  -8   19.43    8.21   8 0.98828-0.79352 0.09150 0.41136-0.09630-0.46906
  13   7   7  -15.75   12.02   8 0.98832-0.70235 0.09170 0.34818-0.09582 0.60227
   1   5   0  463.10   13.30   8 0.98833-0.96733 0.09176 0.22249-0.09566 0.09621
  19  -9  -8  293.08   31.83   8 0.98833-0.60483 0.09176-0.65760-0.09566-0.46483
  20   2  10  -28.69   18.08   8 0.98835-0.54997 0.09183 0.03387-0.09550 0.81982
  18 -10  -6   32.29   17.83   8 0.98835-0.62203 0.09183-0.72047-0.09550-0.32277
  21  -1  10   64.58   17.34   8 0.98835-0.52895 0.09183-0.15464-0.09550 0.82031
   7   3   6  266.23   14.39   8 0.98836-0.83015 0.09189 0.09664-0.09534 0.52719
  12   2   8    3.36   12.06   8 0.98837-0.72153 0.09196 0.03373-0.09518 0.67243
  19  -7   7   23.59    8.67   8 0.98839-0.57663 0.09203-0.53192-0.09502 0.60482
  16  10   6   -3.80   15.85   8 0.98840-0.64140 0.09209 0.53631-0.09485 0.53164
  22  -2  10  -28.85   19.15   8 0.98845-0.50813 0.09236-0.21802-0.09421 0.81964
  18   8   8   -8.99   18.56   8 0.98847-0.59578 0.09243 0.41030-0.09405 0.67460
  10  -8  -4   28.93   10.45   8 0.98847-0.78628 0.09243-0.59534-0.09405-0.18589
  14  -8  -7   50.39   15.54   8 0.98849-0.70798 0.09256-0.59547-0.09373-0.39810
   5   3   5  875.95   27.62   8 0.98851-0.87417 0.09263 0.09592-0.09357 0.45301
   4   6   3  887.20   26.92   8 0.98852-0.89892 0.09269 0.28439-0.09340 0.30962
   8   4  -9   90.91   11.82   8 0.98852-0.83762 0.09269 0.15873-0.09340-0.54443
   9  -3   6   17.40    6.85   8 0.98853-0.78842 0.09276-0.28128-0.09324 0.52623
  23  -7   8   22.68   11.67   8 0.98857-0.49103 0.09296-0.53284-0.09276 0.67609
   6   4  -8    7.08    8.56   8 0.98858-0.87777 0.09302 0.15840-0.09260-0.47497
  16  -4   8   33.99   10.60   8 0.98860-0.63787 0.09309-0.34443-0.09244 0.67190
  15  -9  -6   -6.08   14.36   8 0.98862-0.68528 0.09322-0.65902-0.09212-0.32781
   7  -7  -2  236.08   13.55   8 0.98864-0.84557 0.09329-0.53328-0.09195-0.04690
   4   8   0 1200.31   32.61   8 0.98864-0.90467 0.09329 0.40949-0.09195 0.09415
  22  -8   7   17.71    8.40   8 0.98866-0.51398 0.09342-0.59617-0.09163 0.60310
   9   1   7   51.07   10.63   8 0.98868-0.78669 0.09349-0.03064-0.09147 0.59579
  20  -4   9  274.84   18.40   8 0.98869-0.55219 0.09356-0.34490-0.09131 0.74431
  20   0  10   17.06   17.21   8 0.98874-0.55034 0.09382-0.09380-0.09066 0.81496
   8  -2   6  211.53   11.09   8 0.98875-0.80963 0.09389-0.21957-0.09050 0.52294
   5   7   3  171.60   10.01   8 0.98875-0.87814 0.09389 0.34602-0.09050 0.30726
   3  -1  -6 6592.55  170.32   8 0.98876-0.93714 0.09395-0.15682-0.09034-0.33615
   5   5  -7   69.58    7.56   8 0.98876-0.89706 0.09395 0.22033-0.09034-0.40641
   6  -2   5  333.09   12.74   8 0.98879-0.85348 0.09409-0.21977-0.09002 0.45001
  20  -6   8   18.94   10.20   8 0.98881-0.55420 0.09422-0.47126-0.08970 0.67139
  17   5   9   75.41   18.40   8 0.98884-0.61524 0.09435 0.21985-0.08938 0.74070
  17  -9  -7    7.16   19.40   8 0.98885-0.64539 0.09442-0.66020-0.08921-0.40097
  12   0   8   44.95   12.33   8 0.98888-0.72208 0.09455-0.09454-0.08889 0.66619
   4   0  -7   95.42   10.50   8 0.98889-0.91819 0.09462-0.09463-0.08873-0.40858
   7  -7  -1  357.22   12.16   8 0.98890-0.84396 0.09469-0.53467-0.08857 0.02107
   0   2  -3   65.13    4.29   8 0.98890-0.99456 0.09469 0.03102-0.08857-0.12549
   9  -7  -5   64.54   11.67   8 0.98890-0.80957 0.09469-0.53474-0.08857-0.26328
  16   4   9   38.09   17.01   8 0.98896-0.63631 0.09502 0.15635-0.08776 0.73851
   8  -4   5 3687.43   95.43   8 0.98896-0.81170 0.09502-0.34639-0.08776 0.44886
  10  -6  -7  127.50   16.06   8 0.98899-0.79241 0.09515-0.47234-0.08744-0.40659
   9  11  -1  188.20    8.11   8 0.98905-0.80205 0.09548 0.59584-0.08663 0.02023
  11   7  -9   10.45   10.62   8 0.98906-0.77518 0.09555 0.34445-0.08647-0.54969
  23  -3  10   17.54   18.94   8 0.98906-0.48775 0.09555-0.28404-0.08647 0.81243
   7   7  -7    3.78    6.15   8 0.98906-0.85537 0.09555 0.34445-0.08647-0.40917
  10   2 -10   32.63   14.55   8 0.98912-0.79813 0.09588 0.02983-0.08567-0.62244
  18   6   9   35.76   19.02   8 0.98912-0.59452 0.09588 0.28115-0.08567 0.73751
  11   9   5   20.38   12.01   8 0.98915-0.74891 0.09608 0.46950-0.08518 0.44790
  19 -11   1   23.53    5.67   8 0.98915-0.58871 0.09608-0.78749-0.08518 0.16698
  15   1   9  -12.74   14.11   8 0.98916-0.65751 0.09614-0.03329-0.08502 0.73524
   9   3   7   24.60   10.97   8 0.98919-0.78716 0.09628 0.09226-0.08470 0.58899
   3   5   3  201.93   10.11   8 0.98921-0.92055 0.09641 0.21782-0.08438 0.30004
   2   4  -5  160.60    7.46   8 0.98922-0.95668 0.09648 0.15494-0.08422-0.27146
  10  -4   6   84.96    7.82   8 0.98929-0.76826 0.09687-0.34826-0.08325 0.51682
  14   8   7   -5.98   14.81   8 0.98932-0.68250 0.09707 0.40571-0.08276 0.58987
   7  -5  -6   20.94   10.60   8 0.98932-0.85373 0.09707-0.41135-0.08276-0.34151
   9   5  -9   23.84   10.75   8 0.98935-0.81741 0.09721 0.21707-0.08244-0.55481
  13   5   8   72.07   14.62   8 0.98936-0.70160 0.09727 0.21696-0.08228 0.66014
   2   0   3 6046.44  153.71   8 0.98939-0.94181 0.09747-0.09747-0.08180 0.29694
   6   6  -7  394.47   14.61   8 0.98939-0.87663 0.09747 0.27965-0.08180-0.41438
   3   1   4 1201.89   34.18   8 0.98940-0.91895 0.09754-0.03468-0.08163 0.36866
  20   4  10   43.47   22.14   8 0.98944-0.55115 0.09780 0.15359-0.08099 0.80544
  14   6   8   30.10   14.95   8 0.98946-0.68070 0.09787 0.27920-0.08083 0.65922
  21   5  10  -44.75   24.13   8 0.98947-0.53019 0.09793 0.21631-0.08067 0.80566
   8   0  -9   22.84   13.20   8 0.98950-0.83858 0.09813-0.09815-0.08018-0.55764
  15   3   9   28.94   15.91   8 0.98952-0.65794 0.09827 0.09028-0.07986 0.73016
  10   6  -9   19.11   10.96   8 0.98954-0.79657 0.09840 0.27871-0.07954-0.55713
  17  -7  -9   44.33   26.26   8 0.98954-0.64979 0.09840-0.53843-0.07954-0.55335
   4   2  -7   75.85    9.12   8 0.98954-0.91878 0.09840 0.02731-0.07954-0.41775
  12  10  -7    0.99    6.95   8 0.98955-0.75089 0.09846 0.53005-0.07938-0.41349
   9   9   4  164.98   11.95   8 0.98955-0.79322 0.09846 0.46717-0.07938 0.36970
  13   9   6   44.60   14.00   8 0.98957-0.70560 0.09860 0.46704-0.07905 0.51427
   1   3   2 1377.33   37.12   8 0.98961-0.96486 0.09886 0.08969-0.07841 0.22165
   6   0  -8  289.75   16.29   8 0.98965-0.87880 0.09906-0.09907-0.07792-0.48963
  16 -10  -4   45.28   13.13   8 0.98966-0.66147 0.09913-0.72765-0.07776-0.19885
   5  -5  -4  252.20   12.79   8 0.98966-0.89226 0.09913-0.41339-0.07776-0.20490
  13  -9  -4   62.76   11.97   8 0.98967-0.72447 0.09919-0.66491-0.07760-0.20068
  12   4   8   -4.24   12.72   8 0.98968-0.72294 0.09926 0.15214-0.07744 0.65479
   6   8   3  209.05   11.27   8 0.98968-0.85817 0.09926 0.40353-0.07744 0.29477
   9   7  -8    7.56    7.93   8 0.98968-0.81584 0.09926 0.34071-0.07744-0.48844
   7  -1   6   77.88    8.81   8 0.98969-0.83161 0.09932-0.16217-0.07728 0.50921
  19   7   9   96.85   22.03   8 0.98972-0.57423 0.09952 0.34039-0.07679 0.72929
  16  -6   7   24.38    7.60   8 0.98975-0.64097 0.09972-0.47681-0.07631 0.58452
  18  10   7   65.22   20.17   8 0.98975-0.59895 0.09972 0.52871-0.07631 0.58555
  19   3  10    7.13   19.19   8 0.98977-0.57244 0.09985 0.08869-0.07599 0.79987
  12  12   1   25.40    8.49   8 0.98977-0.73610 0.09985 0.65432-0.07599 0.15392
  10  -2   7   78.95    9.91   8 0.98979-0.76686 0.09999-0.22567-0.07566 0.58056
  19   9   8   32.46   20.97   8 0.98981-0.57619 0.10012 0.46549-0.07534 0.65650
  24  -6   9    6.85   14.67   8 0.98983-0.46946 0.10025-0.47731-0.07502 0.73028
  11  -3   7   38.80    8.63   8 0.98983-0.74591 0.10025-0.28878-0.07502 0.58046
   4  -2  -6  349.19   15.62   8 0.98987-0.91724 0.10058-0.22630-0.07421-0.35172
  15   7   8   -4.28   15.03   8 0.98990-0.66018 0.10078 0.33913-0.07373 0.65268
   3   7   1  361.46   12.21   8 0.98990-0.92506 0.10078 0.33916-0.07373 0.14672
  15  11   5    4.45   14.15   8 0.98991-0.66583 0.10085 0.59046-0.07357 0.43852
  13  11   4   80.80   12.99   8 0.98993-0.70969 0.10098 0.59035-0.07324 0.36576
   9  11   0   36.80    5.91   8 0.98994-0.80109 0.10104 0.59029-0.07308 0.07802
   8   2  -9   36.21   12.45   8 0.98998-0.83900 0.10131 0.02439-0.07244-0.56535
   2   6   1   28.01    4.46   8 0.98998-0.94612 0.10131 0.27579-0.07244 0.14488
   8   6  -8   11.77    7.88   8 0.98999-0.83714 0.10137 0.27574-0.07227-0.49416
   3   3   4  714.43   22.85   8 0.99001-0.91956 0.10151 0.08704-0.07195 0.35898
   6  -4  -6   11.89    9.53   8 0.99002-0.87540 0.10157-0.35300-0.07179-0.35304
   2  -2  -4  122.41    8.87   8 0.99002-0.95555 0.10164-0.22734-0.07163-0.21268
   0   0  -2  755.85   21.36   8 0.99003-0.99379 0.10171-0.10171-0.07147-0.07123
   5  -1   5  250.98   11.35   8 0.99005-0.87580 0.10184-0.16469-0.07114 0.43063
  24  -4  10  -20.76   16.83   8 0.99006-0.46784 0.10190-0.35328-0.07098 0.79761
   6  -6  -3  864.51   26.32   8 0.99008-0.86984 0.10204-0.47916-0.07066-0.14010
  10  -8   1    8.10    2.96   8 0.99008-0.77843 0.10204-0.60485-0.07066 0.14750
  19 -11  -3    4.65   11.92   8 0.99009-0.59711 0.10210-0.79350-0.07050-0.13312
  11   1   8  152.43   12.20   8 0.99011-0.74432 0.10223-0.03938-0.07017 0.64695
  17  -5   8  -12.04    9.18   8 0.99013-0.61851 0.10243-0.41667-0.06969 0.64979
  13  -7   5   29.08    5.05   8 0.99013-0.70803 0.10243-0.54237-0.06969 0.43356
   9  -5  -7  685.93   25.28   8 0.99013-0.81448 0.10243-0.41673-0.06969-0.42486
   5  -3   4  131.46    6.63   8 0.99016-0.87777 0.10263-0.29118-0.06921 0.35734
   6   2  -8  131.82    9.64   8 0.99017-0.87926 0.10276 0.02294-0.06888-0.49863
  11  -5  -8   77.87   11.61   8 0.99017-0.77439 0.10276-0.41705-0.06888-0.49591
   5  -3  -6  395.03   15.92   8 0.99019-0.89657 0.10289-0.29147-0.06856-0.35682
  21  -5   9  534.45   23.83   8 0.99020-0.53280 0.10296-0.41720-0.06840 0.72205
  11  -7  -6   46.27    9.41   8 0.99020-0.77066 0.10296-0.54294-0.06840-0.35367
  16  -2   9    1.47    9.35   8 0.99024-0.63773 0.10329-0.22898-0.06759 0.71849
   3   3  -6   57.28    5.51   9 0.99024-0.93856 0.10329 0.08527-0.06759-0.35888
  10  -8  -3   69.43    8.22   9 0.99025-0.78611 0.10336-0.60620-0.06743-0.14114
   6   2   6  253.27   12.14   9 0.99025-0.85309 0.10336 0.02234-0.06743 0.49878
  15  -7  -8  -24.20   13.42   9 0.99026-0.69052 0.10342-0.54339-0.06727-0.49530
   9  -1   7   18.35    6.62   9 0.99027-0.78835 0.10349-0.16633-0.06711 0.57148
   5  -1  -7  275.70   13.47   9 0.99027-0.89850 0.10349-0.16635-0.06711-0.42962
   9  -1  -9   64.55   11.23   9 0.99032-0.81841 0.10388-0.16676-0.06614-0.57114
  15  -1   9   -3.96   10.43   9 0.99033-0.65876 0.10402-0.16685-0.06581 0.71612
  11   3   8   71.59   10.55   9 0.99034-0.74458 0.10408 0.08447-0.06565 0.64245
  18  -8   6   64.40    7.52   9 0.99034-0.60148 0.10408-0.60687-0.06565 0.50362
  12  -4  -9   16.07   12.36   9 0.99034-0.75545 0.10408-0.35551-0.06565-0.56995
   2  -2   2  631.14   17.06   9 0.99034-0.94463 0.10408-0.22978-0.06565 0.20945
   8  10   2  145.03    9.72   9 0.99035-0.81872 0.10415 0.52432-0.06549 0.21257
  14   2   9   19.85   10.40   9 0.99036-0.67975 0.10421 0.02149-0.06533 0.71508
  11   3 -10    9.59   12.51   9 0.99036-0.77833 0.10428 0.08428-0.06517-0.64234
  18   2  10   -3.53   13.16   9 0.99037-0.59402 0.10435 0.02135-0.06501 0.78834
  15   9   7  367.44   21.37   9 0.99037-0.66253 0.10435 0.46126-0.06501 0.57262
   4  -4  -4  177.55    9.76   9 0.99040-0.91397 0.10454-0.35595-0.06452-0.21869
  17  11   6  -29.08   17.12   9 0.99041-0.62249 0.10468 0.58662-0.06420 0.50158
  12  -8  -5   75.97   12.10   9 0.99043-0.74805 0.10481-0.60765-0.06387-0.28630
  21  -9  -8    3.11   32.79   9 0.99043-0.56483 0.10487-0.67056-0.06371-0.49557
  12  -4   7   45.23    8.00   9 0.99044-0.72555 0.10494-0.35631-0.06355 0.56954
   2   0  -5  308.48   13.16   9 0.99045-0.95788 0.10500-0.10501-0.06339-0.29227
   5   9  -1  279.43    9.27   9 0.99045-0.88740 0.10500 0.46064-0.06339-0.00521
   1   3  -4   68.41    5.43   9 0.99046-0.97699 0.10514 0.08342-0.06307-0.22179
  19  -1  10   40.75   16.27   9 0.99047-0.57313 0.10520-0.16804-0.06291 0.78677
  13  -7  -7   45.77   14.55   9 0.99048-0.73084 0.10527-0.54524-0.06274-0.42958
  17  -3   9   31.89   12.03   9 0.99051-0.61701 0.10553-0.29407-0.06210 0.71354
  20  -2  10   30.42   16.79   9 0.99052-0.55223 0.10566-0.23136-0.06177 0.78622
   3  -3  -4  589.78   19.82   9 0.99052-0.93509 0.10566-0.29423-0.06177-0.22198
  16   8   8  125.05   19.02   9 0.99054-0.63989 0.10580 0.39699-0.06145 0.64100
   8   2   7   80.05   11.29   9 0.99054-0.80959 0.10580 0.01990-0.06145 0.56527
  11   1 -10   21.03   15.38   9 0.99055-0.77848 0.10593-0.04308-0.06113-0.64635
   7  -1  -8   85.38   12.51   9 0.99057-0.85869 0.10606-0.16892-0.06080-0.50617
  18 -10  -5   29.05   16.43   9 0.99057-0.62233 0.10612-0.73470-0.06064-0.28624
   3   1  -6 6100.01  157.42   9 0.99058-0.93887 0.10619-0.04334-0.06048-0.36598
  18  -8  -8  143.00   24.90   9 0.99059-0.62796 0.10626-0.60913-0.06032-0.50065
   9   7   6   44.31   11.13   9 0.99061-0.79051 0.10645 0.33347-0.05984 0.49283
   7   5   6  715.68   25.75   9 0.99062-0.83252 0.10652 0.20773-0.05967 0.49160
   2   4   3  718.06   22.41   9 0.99062-0.94300 0.10652 0.14488-0.05967 0.27481
  12  10   5   21.64   11.77   9 0.99062-0.72950 0.10659 0.52191-0.05951 0.42284
   8  -6  -5  627.82   23.07   9 0.99062-0.83216 0.10659-0.48371-0.05951-0.29286
   4  -2   4 1399.60   38.03   9 0.99062-0.89921 0.10659-0.23228-0.05951 0.34710
   6   6   5  567.03   21.37   9 0.99063-0.85533 0.10665 0.27043-0.05935 0.41935
  11  11   3   59.67   10.70   9 0.99064-0.75419 0.10672 0.58459-0.05919 0.27925
   4   8   1   25.44    4.65   9 0.99064-0.90484 0.10678 0.39602-0.05903 0.13257
   9  -5   5  606.99   18.38   9 0.99067-0.79250 0.10705-0.42130-0.05838 0.42007
   4   2   5 1032.14   31.12   9 0.99067-0.89735 0.10705 0.01865-0.05838 0.41729
   6  -4   4   23.17    4.01   9 0.99068-0.85730 0.10711-0.35850-0.05822 0.34690
   8  -4  -7  274.44   25.50   9 0.99068-0.83601 0.10718-0.35862-0.05806-0.43704
  18   0  10   80.94   17.27   9 0.99069-0.59433 0.10724-0.10724-0.05790 0.78121
  11  -5   6   18.60    6.26   9 0.99070-0.74869 0.10731-0.42155-0.05773 0.49186
  14   0   9  211.63   17.04   9 0.99071-0.68010 0.10744-0.10743-0.05741 0.70716
  10  -4  -8   10.21   13.79   9 0.99072-0.79596 0.10751-0.35895-0.05725-0.50812
  20 -10  -6   40.20   19.95   9 0.99072-0.58237 0.10757-0.73612-0.05709-0.36005
   7   7   5   65.68   10.59   9 0.99073-0.83451 0.10764 0.33231-0.05693 0.41751
   7   9   3  115.84    9.81   9 0.99075-0.83822 0.10784 0.45778-0.05644 0.27431
  16  -6  -9   39.30   22.32   9 0.99075-0.67192 0.10790-0.48503-0.05628-0.57711
   6  -2  -7  272.22   15.61   9 0.99077-0.87805 0.10810-0.23382-0.05579-0.44040
   6   0   6  996.09   30.57   9 0.99078-0.85364 0.10816-0.10816-0.05563 0.48699
  15   5   9    5.37   15.70   9 0.99079-0.65926 0.10830 0.20595-0.05531 0.70566
  15  -9  -5  159.03   15.21   9 0.99079-0.68548 0.10830-0.67400-0.05531-0.29322
   5   9   0  232.46    8.90   9 0.99083-0.88591 0.10876 0.45689-0.05418 0.05692
   9   5   7   16.65   11.85   9 0.99084-0.78888 0.10882 0.20541-0.05402 0.55836
  21  -3  10    7.52   16.65   9 0.99084-0.53153 0.10882-0.29734-0.05402 0.77895
  19   5  10  -32.03   22.97   9 0.99084-0.57353 0.10889 0.20536-0.05385 0.77775
  19 -11  -2   47.85   10.99   9 0.99086-0.59601 0.10908-0.80048-0.05337-0.07890
   7  -3  -7  164.01   13.48   9 0.99087-0.85714 0.10922-0.29779-0.05305-0.44258
   1   1  -4 1251.43   34.58   9 0.99087-0.97739 0.10922-0.04637-0.05305-0.23181
   5   5   5  400.72   17.17   9 0.99088-0.87657 0.10928 0.20496-0.05288 0.41235
   9  -7  -4   46.13    9.94   9 0.99089-0.80957 0.10941-0.54939-0.05256-0.22790
   8  -2  -8   46.78   13.23   9 0.99090-0.83806 0.10948-0.23520-0.05240-0.51404
  10  10   4   31.33   10.67   9 0.99090-0.77357 0.10948 0.51899-0.05240 0.34326
  18   4  10  -35.40   20.81   9 0.99090-0.59449 0.10948 0.14190-0.05240 0.77565
  16 -10  -3   97.70   12.25   9 0.99090-0.66088 0.10954-0.73811-0.05224-0.15304
  19  -9  -7   14.90   20.02   9 0.99091-0.60540 0.10961-0.67530-0.05208-0.43696
   1  -1  -310134.00  256.10   9 0.99091-0.97556 0.10968-0.17253-0.05191-0.16159
  11   7   7   16.48   12.47   9 0.99092-0.74704 0.10974 0.33020-0.05175 0.55722
  15  -7   6   48.62    6.04   9 0.99092-0.66501 0.10981-0.54976-0.05159 0.48792
  12  -2   8   18.33   10.59   9 0.99092-0.72420 0.10981-0.23550-0.05159 0.62895
  14  -8  -6   13.19   13.65   9 0.99092-0.70844 0.10981-0.61264-0.05159-0.36883
  16  -8  -7   14.35   16.69   9 0.99092-0.66839 0.10981-0.61268-0.05159-0.43911
   9  -3  -8   17.08   13.50   9 0.99093-0.81710 0.10987-0.29844-0.05143-0.51446
  14   4   9   12.94   15.41   9 0.99093-0.68035 0.10994 0.14145-0.05127 0.70105
   8   0   7  256.79   14.40   9 0.99095-0.81000 0.11014-0.11013-0.05078 0.55460
   9  11   1   56.15    7.25   9 0.99095-0.80025 0.11020 0.58114-0.05062 0.12691
  12   4 -10  159.60   16.93   9 0.99096-0.75794 0.11027 0.14115-0.05046-0.65650
  20   6  10   33.93   22.96   9 0.99096-0.55262 0.11027 0.26680-0.05046 0.77484
  13  -9  -3   12.26    9.01   9 0.99096-0.72388 0.11033-0.67604-0.05030-0.15662
  10   8   6   83.06   13.38   9 0.99099-0.76996 0.11066 0.39213-0.04949 0.48306
   0   2   1  973.46   26.75   9 0.99100-0.98913 0.11086 0.01484-0.04900 0.12035
   1   5   1  807.64   22.71   9 0.99101-0.96814 0.11092 0.20333-0.04884 0.12074
  17  -9  -6   58.96   16.53   9 0.99102-0.64562 0.11112-0.67683-0.04836-0.37043
  18  -4   9   23.02   12.78   9 0.99103-0.59653 0.11119-0.36256-0.04819 0.70017
  13  -3   8   -3.93    9.89   9 0.99103-0.70332 0.11125-0.29979-0.04803 0.62594
   3   5  -5  842.81   23.85   9 0.99104-0.93747 0.11132 0.20294-0.04787-0.30724
   9   3  -9  -13.32   11.21   9 0.99105-0.81910 0.11145 0.07711-0.04755-0.58970
   6   4   6  217.94   13.42   9 0.99105-0.85391 0.11151 0.13988-0.04739 0.47875
  17   1  10   38.25   16.89   9 0.99105-0.61565 0.11151-0.04866-0.04739 0.77013
   8   8   5   21.56    9.99   9 0.99106-0.81380 0.11158 0.39119-0.04722 0.40832
  11  -1   8  126.26   12.73   9 0.99107-0.74532 0.11171-0.17456-0.04690 0.62372
  17   7   9   54.77   20.03   9 0.99107-0.61757 0.11171 0.32823-0.04690 0.69835
  12  12   2    6.06    9.06   9 0.99107-0.73557 0.11184 0.64236-0.04658 0.19586
   2   2  -5  570.14   18.31   9 0.99109-0.95851 0.11210 0.01360-0.04593-0.30973
  21  -9   6   10.25    6.18   9 0.99109-0.53929 0.11210-0.67774-0.04593 0.48554
  10   2   8   99.43   13.71   9 0.99110-0.76633 0.11217 0.01353-0.04577 0.62203
  10  -8  -2    8.20    6.79   9 0.99111-0.78507 0.11243-0.61525-0.04512-0.09209
  17   3  10   -1.35   18.03   9 0.99111-0.61573 0.11243 0.07611-0.04512 0.76789
   6  -6  -2  192.56    9.29   9 0.99112-0.86899 0.11250-0.48961-0.04496-0.09445
  17   9   8   57.53   20.42   9 0.99113-0.61947 0.11263 0.45298-0.04464 0.62471
   9   1  -9   89.12   13.79   9 0.99113-0.81918 0.11263-0.04978-0.04464-0.59262
   8   4   7   30.60   11.31   9 0.99113-0.81019 0.11276 0.13864-0.04431 0.54813
  19 -11  -1   31.96    8.84   9 0.99113-0.59442 0.11276-0.80416-0.04431-0.01660
  13   1   9   24.67   13.32   9 0.99116-0.70155 0.11328-0.05043-0.04302 0.69223
  14  -6  -8   11.57   16.18   9 0.99117-0.71245 0.11335-0.49050-0.04286-0.52030
   4   0   5   -1.83    6.78   9 0.99117-0.89787 0.11335-0.11334-0.04286 0.40178
  22   0  11   32.32   22.69   9 0.99117-0.50900 0.11335-0.11333-0.04286 0.83966
   5   3  -7  232.69   12.05   9 0.99117-0.89939 0.11341 0.07514-0.04269-0.45403
  16  10   7  -11.30   17.85   9 0.99118-0.64240 0.11355 0.51494-0.04237 0.55058
   5  -5  -3   24.49    6.78   9 0.99119-0.89194 0.11368-0.42795-0.04205-0.16926
  12   8   7  124.95   15.50   9 0.99120-0.72631 0.11387 0.38890-0.04156 0.54756
   6   8  -5   84.62    4.71   9 0.99120-0.87468 0.11400 0.38881-0.04124-0.31222
  10  -6  -6   21.21   11.61   9 0.99121-0.79265 0.11413-0.49126-0.04091-0.38170
  13   3   9  -22.70   14.88   9 0.99121-0.70157 0.11413 0.07441-0.04091 0.69010
  12   6   8   48.12   14.04   9 0.99121-0.72444 0.11420 0.26287-0.04075 0.61807
  21  -7   8    9.72    9.62   9 0.99122-0.53567 0.11427-0.55419-0.04059 0.62289
  11   5   8   27.32   12.41   9 0.99124-0.74547 0.11472 0.19952-0.03946 0.61625
   5   1  -7  269.41   13.88   9 0.99124-0.89948 0.11472-0.05188-0.03946-0.45727
  13  -5   7   51.60    8.13   9 0.99125-0.70542 0.11498-0.42923-0.03881 0.54538
   7   3  -8  187.10   12.14   9 0.99126-0.85939 0.11505 0.07351-0.03865-0.52833
  22  -4  10   19.33   15.41   9 0.99126-0.51100 0.11518-0.36656-0.03833 0.76386
   5   7   4   95.52    8.85   9 0.99126-0.87883 0.11518 0.32475-0.03833 0.32645
   4   6   4  389.35   15.38   9 0.99127-0.89981 0.11538 0.26171-0.03784 0.32541
  15  -5  -9  -12.27   15.37   9 0.99127-0.69345 0.11544-0.42973-0.03768-0.59628
   7  -5  -5    9.28    6.31   9 0.99128-0.85383 0.11564-0.42993-0.03719-0.31574
  12  -6  -7  321.99   17.03   9 0.99129-0.75267 0.11577-0.49292-0.03687-0.45603
   7   1  -8   50.25    8.16   9 0.99130-0.85945 0.11603-0.05318-0.03622-0.53077
   4   4   5  109.10    8.19   9 0.99130-0.89801 0.11610 0.13530-0.03606 0.39499
  13  -1 -10   47.60   13.69   9 0.99130-0.73729 0.11616-0.17902-0.03590-0.67050
  21   1  11   -2.87   15.09   9 0.99130-0.53015 0.11623-0.05337-0.03574 0.83206
  12   2 -10   22.50   10.77   9 0.99131-0.75826 0.11636 0.00934-0.03541-0.67152
  18   8   9   44.34   16.35   9 0.99131-0.59680 0.11636 0.38640-0.03541 0.68736
  16 -10   1   21.57    5.06  10 0.99131-0.65378 0.11649-0.74501-0.03509 0.11523
  10   0   8    3.75    7.80  10 0.99131-0.76650 0.11649-0.11648-0.03509 0.61132
   3  -1   4 1277.19   35.01  10 0.99132-0.92090 0.11662-0.17947-0.03477 0.32181
  14  -4   8  146.06   12.14  10 0.99132-0.68264 0.11662-0.36801-0.03477 0.61323
  13   9  -8    9.38   10.05  10 0.99132-0.73357 0.11675 0.44894-0.03444-0.52925
  22  -6   9  314.48   19.57  10 0.99132-0.51293 0.11681-0.49389-0.03428 0.68846
  18  -6   8   11.64   10.44  10 0.99133-0.59871 0.11695-0.49401-0.03396 0.61459
   3  -1  -5  180.11    9.43  10 0.99133-0.93776 0.11708-0.17993-0.03363-0.32148
   3   7   2   68.93    5.76  10 0.99133-0.92464 0.11714 0.32281-0.03347 0.17781
  11   9   6   18.05   10.68  10 0.99133-0.74926 0.11714 0.44846-0.03347 0.46755
  14  -2 -10   17.48   14.94  10 0.99134-0.71638 0.11721-0.24294-0.03331-0.67258
   5   9   1   51.08    5.99  10 0.99135-0.88456 0.11760 0.44805-0.03234 0.10643
  14   8  -9   -8.47   12.50  10 0.99135-0.71450 0.11779 0.38504-0.03185-0.60265
  16   2  10  -16.04   14.79  10 0.99135-0.63696 0.11786 0.00784-0.03169 0.75392
  10   4   8  221.39   16.39  10 0.99135-0.76652 0.11786 0.13353-0.03169 0.60790
   9   9   5   23.62   10.87  10 0.99136-0.79314 0.11825 0.44737-0.03072 0.39237
  16 -10  -2  129.14   11.30  10 0.99136-0.65946 0.11825-0.74680-0.03072-0.10320
  10  -8  -1  397.62   13.90  10 0.99137-0.78345 0.11845-0.62126-0.03023-0.03562
   4   4  -6   61.84    6.62  10 0.99137-0.91870 0.11851 0.13290-0.03007-0.39585
   6   8   4   14.66    8.06  10 0.99137-0.85799 0.11864 0.38415-0.02975 0.31843
  17  -7  -8   40.21   20.10  10 0.99138-0.64969 0.11884-0.55882-0.02926-0.53222
   2   6   2  143.48    7.66  10 0.99138-0.94565 0.11890 0.25819-0.02910 0.17289
  13  11   5    4.21   13.63  10 0.99138-0.70927 0.11897 0.57236-0.02894 0.39281
  10   4  -9   45.40   11.71  10 0.99138-0.79843 0.11910 0.13231-0.02862-0.60807
   8  10   3   95.30    9.63  10 0.99138-0.81793 0.11936 0.50914-0.02797 0.24640
   7   1   7   87.89   11.23  10 0.99139-0.83144 0.11955-0.05670-0.02748 0.53076
  17  -1  10   68.22   15.71  10 0.99139-0.61600 0.11968-0.18252-0.02716 0.74992
  24  -8   8   18.68   11.22  10 0.99139-0.47292 0.11975-0.62253-0.02700 0.61095
  20  -8  -8   38.31   24.32  10 0.99139-0.58680 0.11975-0.62262-0.02700-0.53287
  18 -10  -4   38.95   13.35  10 0.99139-0.62124 0.11981-0.74834-0.02683-0.24868
  12  -8  -4   51.07   11.26  10 0.99139-0.74715 0.11981-0.62266-0.02683-0.25199
  13  -9  -2   45.07    8.24  10 0.99139-0.72242 0.11988-0.68557-0.02667-0.10889
   3   5   4   10.76    6.74  10 0.99139-0.92095 0.11995 0.19430-0.02651 0.31355
  15  11   6   23.01   16.66  10 0.99139-0.66542 0.11995 0.57135-0.02651 0.46280
   5   1   6  871.70   27.86  10 0.99139-0.87526 0.12001-0.05716-0.02635 0.45718
   7   3   7   19.98   10.12  10 0.99139-0.83142 0.12008 0.06847-0.02619 0.52945
   6  -6  -1 2050.05   53.93  10 0.99139-0.86739 0.12014-0.49725-0.02602-0.04203
  10   0  -9   46.66   13.69  10 0.99139-0.79844 0.12014-0.12015-0.02602-0.61066
  18  -2  10   24.72   15.04  10 0.99139-0.59503 0.12014-0.24582-0.02602 0.74935
  14   8   8   15.80   16.21  10 0.99139-0.68267 0.12014 0.38263-0.02602 0.60445
  13   9   7   74.43   15.82  10 0.99139-0.70550 0.12014 0.44546-0.02602 0.53255
   4   0  -6   -4.50   14.49  10 0.99139-0.91873 0.12021-0.12021-0.02586-0.40006
  11  -7  -5   96.38   12.15  10 0.99140-0.77001 0.12034-0.56033-0.02554-0.32519
   5   3   6  221.31   13.21  10 0.99140-0.87521 0.12053 0.06802-0.02505 0.45586
   4   6  -5   58.57    4.64  10 0.99140-0.91683 0.12073 0.25638-0.02457-0.32999
   4   8   2  109.70    7.59  10 0.99140-0.90372 0.12073 0.38207-0.02457 0.16946
   2   2   4 1510.95   42.11  10 0.99140-0.94191 0.12073 0.00497-0.02457 0.31105
  17   5  10   22.41   20.80  10 0.99140-0.61604 0.12079 0.19345-0.02441 0.74720
  19  -5   9   11.77   12.49  10 0.99140-0.57594 0.12086-0.43508-0.02424 0.67678
  13  -9   1  190.80    7.51  10 0.99140-0.71681 0.12099-0.68665-0.02392 0.10241
  20   2  11  -24.25   22.06  10 0.99140-0.55119 0.12099 0.00471-0.02392 0.81965
  14  -4  -9   38.67   17.28  10 0.99140-0.71452 0.12105-0.37247-0.02376-0.61072
   2  -2  -3  309.75   11.63  10 0.99140-0.95506 0.12105-0.24676-0.02376-0.18919
   9  11   2  158.74   10.55  10 0.99140-0.79879 0.12118 0.57014-0.02343 0.17106
  12   2   9  -30.76   13.74  10 0.99140-0.72275 0.12125 0.00445-0.02327 0.67193
   4  -4  -3  132.52    8.96  10 0.99140-0.91312 0.12138-0.37279-0.02295-0.18891
  18   6  10   -7.49   21.28  10 0.99140-0.59504 0.12144 0.25564-0.02279 0.74611
  16   0  10  245.02   19.96  10 0.99140-0.63702 0.12177-0.12176-0.02198 0.74423
   6  -4  -5  242.27   13.29  10 0.99140-0.87489 0.12177-0.37319-0.02198-0.33149
  18  -6  -9  -17.72   23.53  10 0.99140-0.63063 0.12190-0.49905-0.02165-0.61066
  14  -2   9   29.55   12.42  10 0.99140-0.68081 0.12196-0.24764-0.02149 0.67127
  11   9  -7    9.21    5.98  10 0.99140-0.77371 0.12222 0.44344-0.02084-0.47257
  16   4  10   22.78   18.16  10 0.99140-0.63698 0.12222 0.12917-0.02084 0.74305
  13  -1   9   40.38   12.35  10 0.99140-0.70178 0.12255-0.18538-0.02003 0.66925
  17  -7   7   18.92    7.37  10 0.99140-0.62163 0.12261-0.56254-0.01987 0.52863
  11  11   4   41.40   11.31  10 0.99139-0.75308 0.12268 0.56863-0.01971 0.31112
   5   7  -5   24.57    3.63  10 0.99139-0.89586 0.12274 0.31722-0.01955-0.33446
  20  -8   7   60.57    8.13  10 0.99139-0.55870 0.12287-0.62565-0.01922 0.52963
   9  -5  -6    4.86   10.80  10 0.99139-0.81385 0.12287-0.43716-0.01922-0.40397
  15  -9  -4   65.33   12.92  10 0.99139-0.68423 0.12287-0.68859-0.01922-0.25796
  14   6   9  -23.79   16.45  10 0.99139-0.68084 0.12294 0.25416-0.01906 0.66887
  20 -10  -5  104.91   18.68  10 0.99139-0.58117 0.12307-0.75162-0.01874-0.32705
   4  -2  -5  176.97   11.05  10 0.99139-0.91688 0.12313-0.24885-0.01858-0.33600
  15  -7  -7   73.12   14.80  10 0.99139-0.68982 0.12320-0.56319-0.01842-0.47283
   0   2  -2  685.92   18.30  10 0.99139-0.99514 0.12326 0.00244-0.01825-0.12445
  21  -9  -7   40.08   23.18  10 0.99139-0.56392 0.12333-0.68902-0.01809-0.46985
  19  -3  10   16.29   15.25  10 0.99139-0.57405 0.12339-0.31192-0.01793 0.74180
   8  -6  -4  421.41   16.97  10 0.99138-0.83104 0.12365-0.50077-0.01728-0.26373
   9  -7  -3  603.92   20.78  10 0.99138-0.80819 0.12365-0.56362-0.01728-0.19183
  13   7  -9  -15.30   12.39  10 0.99138-0.73552 0.12385 0.31614-0.01680-0.61827
   9   1   8   29.92   11.77  10 0.99138-0.78758 0.12391-0.06106-0.01663 0.59235
  21  -1  11  -13.15   21.08  10 0.99138-0.53019 0.12391-0.18674-0.01663 0.81290
  11   5  -9   32.31   10.99  10 0.99138-0.77749 0.12391 0.19036-0.01663-0.61954
   9   3   8   63.45   13.37  10 0.99138-0.78757 0.12404 0.06451-0.01631 0.59201
   7  -5   4   67.41    4.33  10 0.99138-0.83702 0.12404-0.43828-0.01631 0.30554
  11  -5  -7  711.27   27.73  10 0.99137-0.77370 0.12417-0.43844-0.01599-0.47744
  13  -7  -6   44.00   13.40  10 0.99137-0.72988 0.12417-0.56415-0.01599-0.40499
   1   1   311089.60  279.98  10 0.99137-0.96475 0.12417-0.06132-0.01599 0.23058
   3  -3  -3  622.40   19.55  10 0.99137-0.93408 0.12424-0.31280-0.01582-0.19659
  16 -10  -1   -6.44    7.49  10 0.99137-0.65760 0.12424-0.75279-0.01582-0.04674
  11  -1  -9   12.83   14.61  10 0.99137-0.77750 0.12430-0.18718-0.01566-0.62052
  15  -3   9   45.82   12.32  10 0.99137-0.65980 0.12443-0.31295-0.01534 0.66566
   1   3   3  403.74   14.27  10 0.99137-0.96474 0.12443 0.06412-0.01534 0.22993
   5  -3  -5  646.55   22.34  10 0.99137-0.89587 0.12443-0.31300-0.01534-0.33869
  12  12   3   44.19   11.89  10 0.99136-0.73398 0.12462 0.62957-0.01485 0.23548
  13   3 -10   48.65   17.54  10 0.99136-0.73735 0.12462 0.06393-0.01485-0.69155
   8   4  -8   35.96    9.77  10 0.99136-0.83850 0.12469 0.12672-0.01469-0.55173
  20   0  11   26.71   21.41  10 0.99136-0.55118 0.12475-0.12475-0.01453 0.81030
  15   7   9    0.51   18.39  10 0.99136-0.65979 0.12482 0.31511-0.01437 0.66469
   8   0  -8  159.59   13.49  10 0.99136-0.83855 0.12482-0.12483-0.01437-0.55210
  10   2  -9  -11.38   12.08  10 0.99135-0.79841 0.12501 0.00069-0.01388-0.62281
   7   9   4   17.74    8.34  10 0.99135-0.83695 0.12514 0.44048-0.01356 0.30277
  18  -8  -7   13.72   18.33  10 0.99134-0.62680 0.12553-0.62836-0.01259-0.47699
   6   4  -7   41.23    7.86  10 0.99134-0.87856 0.12553 0.12587-0.01259-0.48358
   6   0  -7   48.73   10.18  10 0.99134-0.87860 0.12553-0.12554-0.01259-0.48360
   0   4   0   37.28    2.57  10 0.99134-0.99133 0.12566 0.12574-0.01226 0.01226
  12   6  -9   24.80   11.35  10 0.99134-0.75646 0.12566 0.25147-0.01226-0.62336
  12  10   6   13.59   13.10  10 0.99133-0.72835 0.12586 0.50264-0.01178 0.44645
  12   4   9    2.79   14.72  10 0.99133-0.72273 0.12586 0.12554-0.01178 0.66048
  12   0   9   40.40   12.78  10 0.99133-0.72270 0.12586-0.12585-0.01178 0.66046
  15   3  10   11.00   17.51  10 0.99132-0.65793 0.12605 0.06250-0.01129 0.73300
  15   1  10   22.29   16.01  10 0.99132-0.65790 0.12605-0.06320-0.01129 0.73297
  12  -6   6   30.53    6.02  10 0.99132-0.72833 0.12605-0.50313-0.01129 0.44596
  15   9   8   20.26   18.26  10 0.99132-0.66166 0.12618 0.43946-0.01097 0.58998
  15  -5   8    2.99    8.86  10 0.99131-0.66165 0.12657-0.44081-0.00999 0.58902
  13  -9  -1   71.06    7.34  10 0.99129-0.72044 0.12689-0.69257-0.00919-0.05503
  14  -8  -5  -11.60   11.98  10 0.99129-0.70699 0.12696-0.62983-0.00902-0.34007
  12  -4  -8   65.35   15.37  10 0.99128-0.75449 0.12715-0.37857-0.00854-0.55569
  19  -9  -6   84.57   18.35  10 0.99128-0.60390 0.12728-0.69298-0.00821-0.40947
  10  10   5    3.34   10.52  10 0.99128-0.77208 0.12728 0.50119-0.00821 0.37042
  19   3  11   33.70   21.03  10 0.99127-0.57202 0.12754 0.06100-0.00757 0.80272
   1   5   2  579.03   18.04  10 0.99126-0.96653 0.12760 0.18665-0.00740 0.15065
  17  -9  -5  339.16   19.54  10 0.99126-0.64402 0.12760-0.69334-0.00740-0.34005
  19   1  11   42.42   20.47  10 0.99126-0.57203 0.12767-0.06481-0.00724 0.80242
   3   3   5  721.69   23.61  10 0.99126-0.91895 0.12773 0.06082-0.00708 0.36546
   4   2  -6  332.42   13.76  10 0.99125-0.91857 0.12786-0.00216-0.00676-0.41916
   5  -5  -2  176.60    9.23  10 0.99125-0.89013 0.12793-0.44220-0.00659-0.13337
   3   1   5  194.45   10.50  10 0.99125-0.91893 0.12799-0.06514-0.00643 0.36481
  16  -8  -6  144.36   15.50  10 0.99123-0.66683 0.12825-0.63112-0.00578-0.41357
   6  10   0  172.31    7.97  10 0.99123-0.86534 0.12832 0.50019-0.00562 0.00892
  12   8  -8   16.22    8.81  10 0.99123-0.75444 0.12832 0.37450-0.00562-0.55860
   8   6   7    6.12    9.39  10 0.99123-0.81027 0.12838 0.24871-0.00546 0.50927
  14  10   7  120.68   17.94  10 0.99123-0.68436 0.12838 0.50007-0.00546 0.51254
   5   9   2  143.79    8.59  10 0.99122-0.88253 0.12857 0.43706-0.00497 0.15041
   5  -1  -6  545.69   19.35  10 0.99122-0.89761 0.12857-0.19144-0.00497-0.42042
  16   8   9  -10.70   15.32  10 0.99121-0.63865 0.12870 0.37406-0.00465 0.65551
   9   7   7   45.71    9.51  10 0.99120-0.78922 0.12883 0.31108-0.00433 0.50865
   8  -4  -6  173.68   10.98  10 0.99119-0.83459 0.12909-0.38051-0.00368-0.42004
   7   7   6   17.37    7.83  10 0.99119-0.83308 0.12909 0.31085-0.00368 0.43559
   6   6   6   67.27    8.84  10 0.99119-0.85401 0.12916 0.24792-0.00352 0.43486
  16  -6  -8   19.19   12.67  11 0.99117-0.67050 0.12948-0.50663-0.00271-0.55936
   8  -2   7   77.00    7.69  11 0.99116-0.81022 0.12961-0.25530-0.00238 0.50621
   2   4   4  472.15   16.30  11 0.99116-0.94170 0.12961 0.12179-0.00238 0.28887
  20  -4  10   28.98   14.37  11 0.99115-0.55282 0.12980-0.38116-0.00190 0.72630
   9  -1  -8  129.76   11.13  11 0.99114-0.81734 0.12987-0.19273-0.00174-0.56417
  14   0 -10   36.85   13.56  11 0.99114-0.71614 0.12993-0.12994-0.00157-0.70427
   5   5  -6    5.95    5.72  11 0.99113-0.89747 0.13006 0.18420-0.00125-0.42412
   1  -1   2 1631.63   42.17  11 0.99113-0.96640 0.13006-0.19291-0.00125 0.14450
  17  -5  -9   88.06   16.78  11 0.99113-0.65137 0.13012-0.44444-0.00109-0.63181
  10  -4  -7 1450.73   43.73  11 0.99112-0.79446 0.13019-0.38162-0.00093-0.49307
  16  -4   9   16.86   10.61  11 0.99111-0.63860 0.13045-0.38183-0.00028 0.65118
  10  -6   5  201.38    8.33  11 0.99110-0.77194 0.13051-0.50760-0.00012 0.36234
  10  12   0  -13.18    6.35  11 0.99110-0.78129 0.13058 0.62363 0.00005 0.00545
   7   5   7   37.27    9.86  11 0.99110-0.83108 0.13064 0.18360 0.00021 0.50303
  11  -3  -8   88.68   12.28  11 0.99110-0.77534 0.13064-0.31923 0.00021-0.56503
   9  -3   7   22.20    7.82  11 0.99109-0.78916 0.13077-0.31931 0.00053 0.50383
   8   2  -8   79.25   10.73  11 0.99109-0.83827 0.13077-0.00507 0.00053-0.56699
   2   0  -4  778.91   23.13  11 0.99108-0.95664 0.13090-0.13090 0.00086-0.28517
   2   0   4   24.13    6.19  11 0.99107-0.94160 0.13096-0.13096 0.00102 0.28547
   6  -2   6  261.08   11.94  11 0.99106-0.85396 0.13109-0.25679 0.00134 0.43004
  11   3   9   40.96   12.96  11 0.99106-0.74344 0.13116 0.05739 0.00150 0.64665
   1  -1  -2  276.60    9.81  11 0.99106-0.97382 0.13122-0.19407 0.00167-0.14382
   6   2   7   71.91   10.39  11 0.99105-0.85208 0.13128-0.00558 0.00183 0.50090
   9   5  -8   69.51   10.03  11 0.99105-0.81722 0.13128 0.18298 0.00183-0.56771
   7  -3   6  238.09   11.16  11 0.99103-0.83293 0.13154-0.32008 0.00248 0.42945
  11   1   9   29.39   12.45  11 0.99103-0.74338 0.13154-0.06869 0.00248 0.64565
  14  -6   7   15.95    6.99  11 0.99103-0.68421 0.13161-0.50869 0.00264 0.50448
  10   6   8    4.50   12.69  11 0.99103-0.76621 0.13161 0.24547 0.00264 0.57359
  10  -2  -8   82.89   13.41  11 0.99102-0.79624 0.13167-0.25740 0.00280-0.56815
   8   8   6   95.83   12.87  11 0.99101-0.81191 0.13180 0.37098 0.00312 0.42934
   7  -1  -7  299.13   16.10  11 0.99101-0.85726 0.13186-0.19472 0.00329-0.49891
  22  -8  -8  162.24   29.26  11 0.99100-0.54441 0.13199-0.63483 0.00361-0.56235
   7  -1   7   92.93    9.99  11 0.99098-0.83100 0.13225-0.19509 0.00426 0.49901
   6  10   1   25.13    5.18  11 0.99098-0.86319 0.13225 0.49623 0.00426 0.07038
  14   2  10   39.68   15.72  11 0.99097-0.67852 0.13238-0.00668 0.00458 0.71654
   7  -3  -6  159.92   12.21  11 0.99097-0.85537 0.13238-0.32095 0.00458-0.42886
   6  -2  -6  170.53   12.02  11 0.99097-0.87638 0.13238-0.25811 0.00458-0.42942
   5   5   6  160.30   12.70  11 0.99096-0.87478 0.13244 0.18179 0.00474 0.42606
   6   2  -7  265.64   13.51  11 0.99096-0.87819 0.13251-0.00681 0.00490-0.50108
   6  10  -1   27.73    3.65  11 0.99095-0.86693 0.13264 0.49586 0.00523-0.07328
  18 -10  -3   60.51   12.04  11 0.99094-0.61894 0.13270-0.76125 0.00539-0.20956
   3   7   3    7.80    5.80  11 0.99094-0.92235 0.13277 0.30717 0.00555 0.21013
  19  -7  -8   61.99   22.32  11 0.99093-0.60733 0.13283-0.57286 0.00571-0.56615
   9   5   8  170.85   15.89  11 0.99089-0.78711 0.13328 0.18097 0.00685 0.56887
   9  11   3   20.50    8.96  11 0.99089-0.79642 0.13328 0.55804 0.00685 0.21213
  16   6  10   10.40   20.68  11 0.99088-0.63648 0.13347 0.24361 0.00733 0.71490
   8   8  -6   22.17    4.75  11 0.99088-0.83427 0.13347 0.36934 0.00733-0.43105
   8   2   8   37.90   11.99  11 0.99087-0.80807 0.13354-0.00784 0.00750 0.56768
  10  -6  -5   99.46   12.33  11 0.99087-0.79046 0.13354-0.51068 0.00750-0.35877
  15   5  10  -42.45   19.16  11 0.99087-0.65747 0.13360 0.18064 0.00766 0.71405
   0   4   1 2397.35   61.92  11 0.99087-0.98899 0.13360 0.11780 0.00766 0.06369
   9  -3  -7   64.50   12.65  11 0.99085-0.81514 0.13373-0.32229 0.00798-0.50250
   2   4  -4  345.46   11.08  11 0.99085-0.95639 0.13373 0.11767 0.00798-0.29229
  10  12   1   -9.15    7.10  11 0.99085-0.77915 0.13373 0.62045 0.00798 0.06886
  11   7  -8   21.39    8.28  11 0.99085-0.77508 0.13373 0.30625 0.00798-0.57278
  10  -2   8   24.17    9.97  11 0.99084-0.76604 0.13392-0.25961 0.00847 0.56778
   0   2   2  667.84   19.48  11 0.99083-0.98709 0.13399-0.00829 0.00863 0.13407
  16  10   8   -6.65   20.58  11 0.99083-0.64019 0.13399 0.49450 0.00863 0.57093
   4   2   6  182.42   11.64  11 0.99081-0.89562 0.13418-0.00848 0.00912 0.42115
   7   5  -7  873.18   27.07  11 0.99080-0.85705 0.13431 0.17995 0.00944-0.50506
  11   1  -9   25.86   13.56  11 0.99080-0.77685 0.13437-0.07153 0.00960-0.64573
   8  -2  -7   56.46   11.82  11 0.99080-0.83611 0.13437-0.26010 0.00960-0.50470
   8  10   4   91.87   10.92  11 0.99080-0.81542 0.13437 0.49409 0.00960 0.28017
  10   6  -8   31.90    8.69  11 0.99078-0.79596 0.13450 0.24261 0.00993-0.57525
  12  -8  -3  259.66   13.65  11 0.99078-0.74464 0.13457-0.63739 0.01009-0.21755
  10   8  -7    8.15    6.20  11 0.99077-0.79408 0.13463 0.36819 0.01025-0.50422
   5   7   5  216.74   13.07  11 0.99077-0.87647 0.13463 0.30530 0.01025 0.34922
   3   1  -5  182.16   10.07  11 0.99076-0.93721 0.13476-0.07191 0.01057-0.36569
   4   8   3   82.51    8.09  11 0.99075-0.90116 0.13482 0.36795 0.01073 0.20550
  14   2 -10   18.26   17.29  11 0.99075-0.71577 0.13489-0.00919 0.01090-0.71677
   5  -1   6  930.43   28.52  11 0.99073-0.87459 0.13502-0.19786 0.01122 0.41961
   7  -5  -4 2036.04   56.09  11 0.99073-0.85141 0.13502-0.44930 0.01122-0.29280
  11   3  -9   26.15   12.30  11 0.99073-0.77683 0.13508 0.05348 0.01138-0.64755
  23  -9   7   18.07    7.98  11 0.99071-0.49510 0.13521-0.70085 0.01171 0.50036
   2   6   3  116.40    8.07  11 0.99071-0.94309 0.13521 0.24188 0.01171 0.20343
  20  -6   9  336.80   18.13  11 0.99071-0.55427 0.13527-0.51235 0.01187 0.64122
  15  -1  10   62.90   15.49  11 0.99070-0.65729 0.13534-0.19818 0.01203 0.70966
  17   7  10   46.52   22.85  11 0.99070-0.61530 0.13534 0.30458 0.01203 0.71072
   9  -1   8    2.25   10.07  11 0.99070-0.78686 0.13534-0.19817 0.01203 0.56365
  12   8   8  -25.40   15.69  11 0.99068-0.72394 0.13553 0.36725 0.01252 0.56483
  23  -9  -7   86.26   28.07  11 0.99067-0.52124 0.13566-0.70136 0.01284-0.49969
   4   6   5  609.85   22.22  11 0.99066-0.89733 0.13572 0.24136 0.01300 0.34591
  18   4  11  -49.58   23.47  11 0.99066-0.59243 0.13579 0.11561 0.01316 0.78150
  16  -2  10  -22.40   14.27  11 0.99065-0.63625 0.13585-0.26153 0.01333 0.70890
  14   4  10  -10.44   16.41  11 0.99065-0.67817 0.13585 0.11554 0.01333 0.70777
  11  -3   8   49.96   10.51  11 0.99064-0.74487 0.13592-0.32445 0.01349 0.56331
   6   4   7  135.26   12.78  11 0.99063-0.85160 0.13604 0.11535 0.01381 0.48888
  19  -1  11   37.64   19.88  11 0.99061-0.57141 0.13624-0.19907 0.01430 0.78093
   3   3  -5  324.82   12.10  11 0.99059-0.93703 0.13636 0.05219 0.01462-0.36974
  12  -6  -6  224.33   16.11  11 0.99059-0.75012 0.13636-0.51352 0.01462-0.43617
  13  11   6   51.96   15.97  11 0.99059-0.70661 0.13643 0.55490 0.01478 0.42043
  10  -4   7  111.20    9.22  11 0.99057-0.76767 0.13656-0.38794 0.01511 0.48981
   6   8   5   26.69    9.13  11 0.99054-0.85529 0.13681 0.36598 0.01576 0.34427
   9   9   6   23.22   12.88  11 0.99052-0.79044 0.13701 0.42862 0.01624 0.41677
  15  -9  -3   -4.34    9.87  11 0.99052-0.68144 0.13707-0.70274 0.01640-0.22222
  11   9   7   33.95   14.05  11 0.99052-0.74664 0.13707 0.42857 0.01640 0.48907
  18   0  11   -4.72   19.55  11 0.99052-0.59226 0.13707-0.13705 0.01640 0.77823
   6   6  -6   69.89    6.23  11 0.99051-0.87589 0.13713 0.23998 0.01656-0.44139
  14   0  10  488.55   24.35  11 0.99049-0.67804 0.13733-0.13732 0.01705 0.70408
   9  -7  -2  462.74   17.00  11 0.99048-0.80542 0.13739-0.57737 0.01721-0.15497
   8  -4   6  361.26   13.73  11 0.99046-0.81140 0.13752-0.38891 0.01754 0.41494
   8   4   8  857.83   31.27  11 0.99045-0.80762 0.13765 0.11375 0.01786 0.55729
  20  -2  11    7.37   18.97  11 0.99044-0.55023 0.13771-0.26338 0.01802 0.77771
  12   6   9   25.49   14.74  11 0.99043-0.72179 0.13784 0.23924 0.01835 0.63033
  12  12   4  -31.29   12.31  11 0.99042-0.73113 0.13790 0.61626 0.01851 0.27346
  11  -7  -4  102.74   11.41  11 0.99040-0.76713 0.13803-0.57801 0.01883-0.29820
   6   0   7   16.19    8.44  11 0.99039-0.85139 0.13816-0.13815 0.01916 0.48356
  20 -10  -4  178.84   17.14  11 0.99038-0.57828 0.13822-0.76676 0.01932-0.29374
  15  -5  -8   21.52   15.66  11 0.99038-0.69070 0.13822-0.45253 0.01932-0.58194
  19  -7   8   28.74    9.45  11 0.99037-0.57680 0.13829-0.57822 0.01948 0.56173
  15  11   7  -25.52   19.18  11 0.99036-0.66252 0.13841 0.55289 0.01980 0.48783
  11  11   5  -35.33   12.78  11 0.99036-0.75017 0.13841 0.55289 0.01980 0.34295
   7   7  -6  105.15    6.84  11 0.99031-0.85470 0.13880 0.30117 0.02077-0.44505
  13   7   9  -29.60   16.92  11 0.99030-0.70068 0.13886 0.30106 0.02094 0.62828
   1   1  -310056.00  253.54  11 0.99030-0.97496 0.13886-0.07601 0.02094-0.23444
  11   5   9    8.66   14.10  11 0.99027-0.74263 0.13905 0.17519 0.02142 0.62672
   4  -4  -2  461.78   15.44  11 0.99026-0.91009 0.13918-0.39059 0.02175-0.16225
  17  -3  10   28.77   14.60  11 0.99026-0.61485 0.13918-0.32769 0.02175 0.70100
  17   3  11    2.42   20.25  11 0.99025-0.61301 0.13925 0.04930 0.02191 0.77222
   8   6  -7   67.74    8.04  11 0.99025-0.83553 0.13925 0.23787 0.02191-0.51699
   4   4   6   43.04    9.25  11 0.99023-0.89507 0.13937 0.11202 0.02223 0.40805
  10   2   9   13.05   13.58  11 0.99023-0.76358 0.13937-0.01367 0.02223 0.62536
  17  -7  -7   -0.97   16.08  11 0.99022-0.64669 0.13950-0.57951 0.02256-0.51271
  20  -8  -7   80.40   20.32  11 0.99019-0.58370 0.13969-0.64254 0.02304-0.51153
   9   7  -7   68.55    7.81  11 0.99019-0.81449 0.13969 0.30028 0.02304-0.51757
   8   0   8   13.80   10.84  11 0.99018-0.80735 0.13976-0.13975 0.02320 0.55195
  21  -5  10   -9.85   15.97  11 0.99016-0.53088 0.13995-0.45419 0.02369 0.70131
  21 -11  -1   49.02   11.09  11 0.99016-0.55146 0.13995-0.83133 0.02369-0.08351
   6  10   2   31.05    6.55  11 0.99015-0.86050 0.14001 0.48847 0.02385 0.12214
  17   1  11    9.91   19.46  11 0.99014-0.61287 0.14008-0.07722 0.02401 0.77009
  12   0  -9   28.77   13.34  11 0.99013-0.75527 0.14014-0.14016 0.02417-0.65981
  17  -5   9   49.30   10.63  11 0.99008-0.61658 0.14052-0.45476 0.02515 0.62631
  13   3  10   41.73   15.02  11 0.99008-0.69857 0.14052 0.04802 0.02515 0.69540
  10  12   2   -2.47    7.47  11 0.99007-0.77651 0.14059 0.61360 0.02531 0.12288
   3   5   5  184.43   11.38  11 0.99007-0.91774 0.14059 0.17366 0.02531 0.33307
  13   9   8   -2.82   15.55  11 0.99006-0.70236 0.14065 0.42499 0.02547 0.55245
   5   9   3   80.23    8.44  11 0.99005-0.87951 0.14072 0.42492 0.02563 0.19115
  15  -3  -9   26.18   16.13  11 0.99002-0.69216 0.14091-0.32947 0.02612-0.66005
   8  -6  -3  600.27   19.91  11 0.98999-0.82778 0.14116-0.51829 0.02676-0.23643
   9   1  -8  123.77   10.34  11 0.98993-0.81613 0.14155-0.07870 0.02774-0.59365
  13   1  10  245.42   16.35  11 0.98993-0.69843 0.14155-0.07869 0.02774 0.69281
  21  -9  -6   17.06   15.34  11 0.98989-0.56054 0.14180-0.70748 0.02838-0.44496
   7   9   5   54.23    9.36  11 0.98989-0.83364 0.14180 0.42383 0.02838 0.33219
   5  -5  -1  463.50   14.44  11 0.98989-0.88688 0.14180-0.45607 0.02838-0.09699
  14   8   9   12.34   13.62  11 0.98987-0.67927 0.14193 0.36084 0.02871 0.62106
  12  -2   9  -10.52    8.21  11 0.98986-0.72122 0.14199-0.26767 0.02887 0.61980
  16  -6   8   17.91    9.66  11 0.98984-0.63921 0.14212-0.51921 0.02919 0.55038
  11  -1   9   22.62    8.68  12 0.98981-0.74214 0.14231-0.20514 0.02968 0.61843
   4  -2   5 1080.79   30.63  12 0.98980-0.89652 0.14237-0.26807 0.02984 0.32910
   4   0   6  959.44   29.06  12 0.98978-0.89460 0.14257-0.14256 0.03033 0.39995
   5  -3   5  902.42   26.06  12 0.98976-0.87548 0.14269-0.33123 0.03065 0.32883
  10   4   9   25.73   10.50  12 0.98976-0.76307 0.14269 0.10870 0.03065 0.61692
  12   4  -9    1.27    9.25  12 0.98975-0.75483 0.14276 0.10865 0.03081-0.66640
  22  -8   8    8.05   10.84  12 0.98974-0.51322 0.14282-0.64560 0.03097 0.55188
  24  -8  -8   14.88   28.72  12 0.98972-0.50117 0.14295-0.64578 0.03130-0.58894
  13  -1  -9   22.88   10.77  12 0.98972-0.73385 0.14295-0.20582 0.03130-0.66636
  14  -2  -9  -29.28   11.80  12 0.98970-0.71288 0.14308-0.26881 0.03162-0.66616
   3  -1  -4  445.35   15.09  12 0.98970-0.93428 0.14308-0.20594 0.03162-0.31539
   9   3  -8   56.82    9.19  12 0.98968-0.81584 0.14314 0.04541 0.03178-0.59766
   1   5   3  178.78    8.84  12 0.98967-0.96307 0.14320 0.17105 0.03194 0.18265
   6  -4  -4   94.68    7.90  12 0.98965-0.87127 0.14333-0.39474 0.03227-0.31438
  15  -7  -6   74.44   13.38  12 0.98964-0.68620 0.14339-0.58339 0.03243-0.45232
   2  -2  -2  319.18   10.98  12 0.98963-0.95144 0.14346-0.26917 0.03259-0.17420
  13  -7  -5  140.08   12.79  12 0.98963-0.72631 0.14346-0.58348 0.03259-0.38224
  19  -5  -9  -12.83   19.53  12 0.98962-0.60784 0.14352-0.45779 0.03275-0.66449
  16   8  -9    1.18   15.02  12 0.98962-0.67079 0.14352 0.35930 0.03275-0.66614
   1   3  -3 1533.45   40.00  12 0.98962-0.97427 0.14352 0.04503 0.03275-0.24626
  13  -5  -7   94.90   14.54  12 0.98956-0.72997 0.14390-0.45820 0.03373-0.52608
  17  -9  -4   39.50   12.53  12 0.98954-0.64041 0.14403-0.70975 0.03405-0.31014
  18  -6  -8  -23.06   18.20  12 0.98953-0.62693 0.14409-0.52127 0.03421-0.59521
   9  -5  -5  107.12   10.84  12 0.98950-0.81005 0.14428-0.45856 0.03470-0.38652
  12  10   7  114.97   18.11  12 0.98950-0.72460 0.14428 0.48418 0.03470 0.47130
   5   1  -6  506.73   18.65  12 0.98950-0.89587 0.14428-0.08144 0.03470-0.46008
  14  -8  -4  114.58   12.24  12 0.98949-0.70326 0.14435-0.64717 0.03486-0.31258
  21 -11   0    9.24    9.40  12 0.98946-0.54889 0.14448-0.83584 0.03518-0.02365
  10  10   6  -13.28   12.41  12 0.98946-0.76842 0.14448 0.48401 0.03518 0.39839
  18 -10  -2   43.51   10.19  12 0.98943-0.61556 0.14467-0.77321 0.03567-0.16849
  13  -3   9  -32.91   11.94  12 0.98941-0.69981 0.14479-0.33332 0.03599 0.61325
  18  -8  -6    9.75   15.64  12 0.98939-0.62302 0.14492-0.64779 0.03631-0.45457
  19  -9  -5  282.10   18.54  12 0.98939-0.60018 0.14492-0.71066 0.03631-0.38267
   5   3   7   20.83    9.70  12 0.98938-0.87138 0.14498 0.04357 0.03648 0.46570
   3  -3  -2  259.65    9.91  12 0.98938-0.93020 0.14498-0.33355 0.03648-0.17753
   2   2   5  495.15   18.15  12 0.98938-0.93803 0.14498-0.01928 0.03648 0.32135
  16   2  11   32.71   19.40  12 0.98937-0.63313 0.14505-0.01935 0.03664 0.75697
   7   3   8   60.24   13.16  12 0.98937-0.82748 0.14505 0.04350 0.03664 0.53795
   0   4   2 1646.59   44.10  12 0.98934-0.98560 0.14517 0.10623 0.03696 0.10574
   2   2  -4  113.99    7.16  12 0.98934-0.95487 0.14517-0.01947 0.03696-0.32127
   1   3   4  198.64   10.69  12 0.98931-0.96083 0.14537 0.04319 0.03745 0.24849
  10   0   9   30.11   11.38  12 0.98931-0.76262 0.14537-0.14535 0.03745 0.61012
   7   1  -7  319.57   15.46  12 0.98930-0.85558 0.14543-0.08258 0.03761-0.53325
  21  -7  -8   -2.30   23.41  12 0.98929-0.56373 0.14549-0.58552 0.03777-0.59711
   3  -3   3  479.58   13.78  12 0.98924-0.92069 0.14575-0.33429 0.03842 0.17728
  18  -4  10   -8.29   14.18  12 0.98923-0.59288 0.14581-0.39719 0.03858 0.68476
   9  11   4    0.09   10.30  12 0.98920-0.79284 0.14600 0.54531 0.03907 0.25125
  14   6  10  -13.85   18.56  12 0.98914-0.67667 0.14632 0.23076 0.03987 0.68124
  11  -5  -6   71.33   12.70  12 0.98913-0.76961 0.14638-0.46067 0.04004-0.46213
  12   2  -9    9.86   12.08  12 0.98912-0.75423 0.14644-0.02074 0.04020-0.67581
   7   1   8  249.77   15.86  12 0.98907-0.82721 0.14670-0.08384 0.04085 0.53376
   5   1   7  205.05   13.05  12 0.98904-0.87104 0.14683-0.08397 0.04117 0.46101
   5   3  -6  395.16   14.88  12 0.98904-0.89542 0.14683 0.04173 0.04117-0.46655
   2  -2   3  203.83    7.53  12 0.98902-0.94144 0.14695-0.27265 0.04149 0.17365
  16  -8  -5  209.40   16.19  12 0.98902-0.66272 0.14695-0.64979 0.04149-0.38947
  13   5  10  -12.02   16.53  12 0.98897-0.69746 0.14721 0.16702 0.04214 0.67840
   3  -1   5  177.30    9.67  12 0.98895-0.91663 0.14733-0.21017 0.04246 0.31592
  15   7  10  -19.44   20.96  12 0.98892-0.65549 0.14746 0.29247 0.04279 0.67888
  16   4  11  -10.65   21.88  12 0.98891-0.63264 0.14752 0.10387 0.04295 0.75062
  14  10   8   12.62   18.65  12 0.98890-0.68016 0.14759 0.48086 0.04311 0.53531
   7   3  -7  149.74   10.81  12 0.98887-0.85511 0.14771 0.04084 0.04343-0.53905
  13   5  -9   18.41   12.00  12 0.98887-0.73300 0.14771 0.16655 0.04343-0.67849
  14  10  -7   22.05    7.90  12 0.98886-0.70823 0.14778 0.48074 0.04360-0.53537
  12   2  10   28.35   14.71  12 0.98885-0.71836 0.14784-0.02214 0.04376 0.67628
   5  -3  -4  311.28   13.64  12 0.98882-0.89142 0.14797-0.33653 0.04408-0.32674
  11  -5   7  103.26    9.09  12 0.98882-0.74495 0.14797-0.46221 0.04408 0.46139
   3   7   4  304.89   13.72  12 0.98882-0.91838 0.14797 0.29198 0.04408 0.24295
   4  -2  -4 1456.95   40.78  12 0.98877-0.91238 0.14822-0.27394 0.04473-0.32795
  10   0  -8  128.40   13.45  12 0.98876-0.79394 0.14828-0.14829 0.04489-0.61022
   1   1   4  903.72   26.90  12 0.98872-0.96022 0.14847-0.08562 0.04537 0.24056
  15   7  -9   -5.30   12.84  12 0.98871-0.69087 0.14854 0.29144 0.04554-0.67949
  12  -8  -2  201.67   11.05  12 0.98863-0.74065 0.14892-0.65175 0.04651-0.18262
   4   8   4   48.93    8.80  12 0.98862-0.89715 0.14898 0.35379 0.04667 0.24090
   7   7   7   23.05   12.02  12 0.98861-0.82863 0.14904 0.29089 0.04683 0.45643
   8  10   5   -7.95   10.43  12 0.98856-0.81129 0.14930 0.47916 0.04748 0.31363
  17  -1  11   66.04   19.25  12 0.98852-0.61126 0.14949-0.21232 0.04796 0.74615
  10  12   3   -5.96    9.69  12 0.98850-0.77308 0.14955 0.60464 0.04812 0.17141
   2   4   5   62.42    8.80  12 0.98846-0.93712 0.14974 0.10166 0.04861 0.30922
  14   6  -9   18.12   17.80  12 0.98846-0.71163 0.14974 0.22739 0.04861-0.68314
   6  10   3   71.33    8.84  12 0.98845-0.85694 0.14980 0.47869 0.04877 0.16857
   6   6   7   33.53   11.42  12 0.98845-0.84940 0.14980 0.22728 0.04877 0.45392
   8   6   8   50.70   13.10  12 0.98841-0.80561 0.14999 0.22711 0.04926 0.52592
  15   9  -8    8.86   11.00  12 0.98841-0.68871 0.14999 0.41570 0.04926-0.61186
   6  -4   5  442.99   14.48  12 0.98841-0.85315 0.14999-0.40137 0.04926 0.31077
   7  11   1   65.30    6.72  12 0.98836-0.83962 0.15024 0.54111 0.04990 0.02529
  16   0  11  -15.20   19.28  12 0.98833-0.63208 0.15037-0.15036 0.05023 0.74337
   3   3   6  117.22   10.54  12 0.98833-0.91415 0.15037 0.03818 0.05023 0.37950
  12   4  10   50.82   16.75  12 0.98833-0.71784 0.15037 0.10102 0.05023 0.66981
   9  -7  -1  477.42   15.54  12 0.98832-0.80139 0.15043-0.59041 0.05039-0.11680
   9  -5   6   11.38    5.75  12 0.98832-0.78826 0.15043-0.46467 0.05039 0.38263
  15  -9  -2  536.00   19.65  12 0.98827-0.67734 0.15062-0.71631 0.05087-0.18534
   2   6   4  306.52   13.44  12 0.98823-0.93878 0.15081 0.22629 0.05136 0.23513
   8   8   7   37.75   12.64  12 0.98823-0.80727 0.15081 0.35197 0.05136 0.45245
   9   1   9   20.27   12.25  12 0.98823-0.78253 0.15081-0.08795 0.05136 0.59567
  18  -2  11  -13.81   18.87  12 0.98819-0.58997 0.15100-0.27668 0.05184 0.74283
  12  -4  -7  654.59   26.39  12 0.98818-0.74957 0.15107-0.40251 0.05201-0.54492
  14  -4   9    1.78   10.58  12 0.98816-0.67757 0.15113-0.40249 0.05217 0.59760
  16  -8   6    9.60    5.27  12 0.98814-0.64124 0.15125-0.65404 0.05249 0.38438
   7  11   0  153.26    7.60  12 0.98812-0.84123 0.15132 0.54002 0.05265-0.04881
  11  -1  -8   41.22   13.14  12 0.98808-0.77233 0.15151-0.21438 0.05314-0.61796
  12  12   5   16.75   14.78  12 0.98808-0.72690 0.15151 0.60263 0.05314 0.31017
  15   3  11   39.98   20.27  12 0.98804-0.65271 0.15170 0.03685 0.05362 0.73936
  10   8   8  -13.60   13.71  12 0.98801-0.76324 0.15182 0.35097 0.05395 0.52232
  12  -2  -8  252.27   18.01  12 0.98801-0.75129 0.15182-0.27756 0.05395-0.61823
  13  -1  10  283.03   19.43  12 0.98797-0.69651 0.15201-0.21485 0.05443 0.66616
   0   2   3   54.37    6.23  12 0.98797-0.98231 0.15201-0.02631 0.05443 0.15961
   8  -4  -5  368.74   16.27  12 0.98789-0.82944 0.15233-0.40375 0.05524-0.40761
  22  -8  -7  108.31   22.39  12 0.98788-0.53943 0.15239-0.65523 0.05540-0.54280
  14  -2  10   -8.98   13.01  12 0.98782-0.67535 0.15264-0.27831 0.05605 0.66506
  13  -5   8   18.70    8.66  12 0.98781-0.70010 0.15270-0.46694 0.05621 0.52170
   7   5   8  426.83   21.26  12 0.98781-0.82591 0.15270 0.16153 0.05621 0.51837
  10   4  -8   22.95   10.00  12 0.98779-0.79300 0.15277 0.09864 0.05637-0.62173
   5   7   6  104.71   11.88  12 0.98778-0.87164 0.15283 0.28711 0.05653 0.37430
  20 -10  -3   47.12   12.31  12 0.98775-0.57378 0.15296-0.78150 0.05686-0.25993
   3   1   6 1028.23   31.60  12 0.98772-0.91354 0.15308-0.09023 0.05718 0.37255
  13  11   7  -16.23   17.62  12 0.98764-0.70177 0.15340 0.53791 0.05799 0.44856
   5   9   4  108.39   10.02  12 0.98764-0.87521 0.15340 0.41223 0.05799 0.23014
   5   5   7   89.00   11.59  12 0.98763-0.86956 0.15346 0.16078 0.05815 0.44400
   8   0  -7   77.59   10.69  12 0.98761-0.83287 0.15352-0.15353 0.05831-0.55338
  17  -5  -8   62.24   15.96  12 0.98760-0.64591 0.15359-0.46786 0.05847-0.61996
  10   6   9   17.82   12.80  12 0.98758-0.76095 0.15365 0.22345 0.05863 0.58899
  11   7   9   32.93   13.25  12 0.98755-0.73993 0.15378 0.28617 0.05896 0.58920
  10  -6  -4   87.64    9.57  12 0.98754-0.78523 0.15384-0.53096 0.05912-0.33903
  12   0  10  131.00   15.33  12 0.98754-0.71701 0.15384-0.15382 0.05912 0.66088
  11  11   6  -15.40   13.63  12 0.98750-0.74548 0.15396 0.53737 0.05944 0.37468
  13   1  -9  -13.61   11.69  12 0.98750-0.73163 0.15396-0.09112 0.05944-0.69450
  10  -4  -6    4.96    7.96  12 0.98749-0.78893 0.15403-0.40545 0.05960-0.48223
   6   8   6    3.84    9.02  12 0.98749-0.85031 0.15403 0.34874 0.05960 0.37175
  19  -7  -7  -35.03   14.55  12 0.98746-0.60199 0.15415-0.59418 0.05993-0.54901
  22 -10  -4   42.11   14.85  12 0.98740-0.53337 0.15440-0.78299 0.06057-0.33392
   7  11   2  169.17   10.93  12 0.98738-0.83676 0.15447 0.53687 0.06074 0.08580
   4   6   6   11.66    6.79  12 0.98738-0.89218 0.15447 0.22262 0.06074 0.36953
   6   0  -6   13.60    6.07  12 0.98737-0.87276 0.15453-0.15454 0.06090-0.48573
  23  -9  -6   27.72   14.75  12 0.98733-0.51606 0.15466-0.72039 0.06122-0.47673
   9   9   7    9.83    9.61  12 0.98727-0.78533 0.15491 0.41072 0.06187 0.44249
  19  -3  11   22.68   15.38  13 0.98721-0.56800 0.15516-0.34368 0.06251 0.73271
  18 -10  -1  158.90   11.81  13 0.98718-0.61144 0.15528-0.78384 0.06284-0.12431
  18  -6   9    9.27   11.57  13 0.98711-0.59264 0.15554-0.53261 0.06348 0.58852
  21  -7   9   30.76   13.25  13 0.98708-0.52967 0.15566-0.59559 0.06381 0.58985
  17  -3  -9    4.45   12.29  13 0.98706-0.64725 0.15572-0.34429 0.06397-0.69681
   9   5   9   33.81   10.38  13 0.98705-0.78139 0.15579 0.15846 0.06413 0.58293
   7  -5  -3   68.34    7.24  13 0.98705-0.84581 0.15579-0.47005 0.06413-0.27434
   6   2   8   93.74    9.86  13 0.98703-0.84615 0.15585-0.03015 0.06429 0.50976
  11   3  10   -5.38   11.13  13 0.98702-0.73750 0.15591 0.03264 0.06445 0.65503
  11  -3  -7   57.88    9.59  13 0.98702-0.76937 0.15591-0.34449 0.06445-0.55790
  11   9   8    6.65   14.72  13 0.98700-0.74122 0.15597 0.40965 0.06461 0.51218
  12   8   9  -25.39   15.16  13 0.98700-0.71836 0.15597 0.34679 0.06461 0.58406
  10   2  -8   95.54   11.17  13 0.98698-0.79215 0.15604-0.03034 0.06477-0.63010
  19  -5  10   27.85   13.61  13 0.98697-0.56961 0.15610-0.47030 0.06494 0.65892
  15  -3  10    1.65   12.36  13 0.98695-0.65350 0.15616-0.34468 0.06510 0.65656
  11  -7  -3  175.46   11.33  13 0.98693-0.76179 0.15623-0.59620 0.06526-0.27328
  13   3  -9   33.77   12.13  13 0.98692-0.73104 0.15629 0.03227 0.06542-0.70047
   2   0   5   24.78    6.61  13 0.98688-0.93555 0.15641-0.15641 0.06574 0.29209
  14  -6  -6   43.67   12.83  13 0.98687-0.70440 0.15648-0.53361 0.06591-0.48634
   5  -1  -5   43.80    8.04  13 0.98687-0.89135 0.15648-0.21934 0.06591-0.41993
  13  -7   6   46.63    6.18  13 0.98682-0.70286 0.15666-0.59660 0.06639 0.36884
  23  -7  -8   39.61   24.85  13 0.98677-0.51921 0.15685-0.59685 0.06687-0.62509
   1  -1   311823.40  297.73  13 0.98675-0.96014 0.15692-0.21976 0.06704 0.14756
  15  -7   7   -9.41    6.62  13 0.98670-0.65892 0.15710-0.59705 0.06752 0.44016
  18  -8   7   87.15    8.36  13 0.98670-0.59597 0.15710-0.65989 0.06752 0.44180
  15   5  11   13.28   20.76  13 0.98665-0.65138 0.15729 0.15695 0.06801 0.72504
  20  -6  -8   61.37   21.11  13 0.98665-0.58205 0.15729-0.53445 0.06801-0.62788
   7  -3  -5  930.66   29.18  13 0.98663-0.84919 0.15735-0.34594 0.06817-0.42111
   4   4  -5  265.34   10.30  13 0.98662-0.91206 0.15742 0.09399 0.06833-0.42289
  12  10  -6   71.24    7.02  13 0.98660-0.74607 0.15748 0.47104 0.06849-0.49001
   9  -1  -7  195.02   13.81  13 0.98658-0.81087 0.15754-0.22040 0.06865-0.56318
   4   2   7  226.42   13.42  13 0.98653-0.88945 0.15773-0.03203 0.06914 0.43247
   0   4   3  549.50   18.16  13 0.98653-0.98087 0.15773 0.09367 0.06914 0.14490
  12  -6  -5  128.16   13.01  13 0.98651-0.74414 0.15779-0.53493 0.06930-0.41948
   7   9   6   18.87   11.93  13 0.98648-0.82838 0.15792 0.40772 0.06962 0.36231
   1   5   4   59.42    7.84  13 0.98641-0.95793 0.15817 0.15608 0.07027 0.21568
  10  -2  -7   93.34   12.48  13 0.98641-0.78975 0.15817-0.28389 0.07027-0.56427
  14   0  -9   16.98   13.86  13 0.98639-0.70957 0.15823-0.15825 0.07043-0.70497
  14   2  11   12.15   18.69  13 0.98638-0.67208 0.15829-0.03259 0.07059 0.72191
   6   4   8  421.16   20.74  13 0.98638-0.84551 0.15829 0.09310 0.07059 0.50347
   8   2   9   19.96   12.38  13 0.98636-0.80163 0.15836-0.03265 0.07075 0.57573
   3   5  -4   98.67    4.91  13 0.98634-0.93088 0.15842 0.15584 0.07091-0.35467
   0   0   2  745.54   21.42  13 0.98631-0.98255 0.15854-0.15854 0.07124 0.07146
  16  -2  -9   46.55   16.78  13 0.98622-0.66738 0.15886-0.28457 0.07204-0.70543
   6  -2  -5   80.76    9.63  13 0.98618-0.86969 0.15898-0.28470 0.07237-0.42584
   9  -3  -6   20.87   10.35  13 0.98616-0.80859 0.15904-0.34761 0.07253-0.49571
   9  11   5   57.28   11.87  13 0.98615-0.78793 0.15911 0.53221 0.07269 0.28898
  14   8  -8   72.41   10.49  13 0.98613-0.70738 0.15917 0.34365 0.07285-0.63598
   4  -4  -1 1566.89   41.30  13 0.98613-0.90410 0.15917-0.41058 0.07285-0.14201
   8  -2   8    9.68    9.50  13 0.98608-0.80324 0.15936-0.28504 0.07333 0.50182
   3   5   6   14.63    8.97  13 0.98606-0.91184 0.15942 0.15482 0.07350 0.35622
   8  -6  -2  243.80   10.78  13 0.98602-0.82196 0.15954-0.53668 0.07382-0.21213
  11   5  -8   68.04   10.62  13 0.98602-0.77026 0.15954 0.15472 0.07382-0.63863
   4  -4   3  923.98   24.45  13 0.98597-0.89643 0.15973-0.41113 0.07430 0.14194
  15  -1  -9   22.59   15.68  13 0.98595-0.68809 0.15979-0.22265 0.07446-0.70840
  20  -8  -6   35.21   16.45  13 0.98595-0.57762 0.15979-0.66267 0.07446-0.49163
  10  12   4   56.60   11.84  13 0.98595-0.76861 0.15979 0.59436 0.07446 0.21640
   7  -1  -6  147.55   11.18  13 0.98593-0.85032 0.15986-0.22272 0.07463-0.49890
  12   6  10   32.45   17.57  13 0.98591-0.71537 0.15992 0.21715 0.07479 0.64520
   8   4  -7  274.98   13.48  13 0.98590-0.83117 0.15998 0.09143 0.07495-0.57003
  14   4  11   -6.32   19.67  13 0.98590-0.67154 0.15998 0.09141 0.07495 0.71748
   7  -1   8  207.12   14.00  13 0.98584-0.82397 0.16017-0.22300 0.07543 0.49916
  21  -9  -5   16.95   15.21  13 0.98580-0.55460 0.16029-0.72600 0.07576-0.42100
   4   4   7   94.46   11.54  13 0.98580-0.88874 0.16029 0.09110 0.07576 0.42585
  17  -9  -3   48.42   11.31  13 0.98577-0.63475 0.16042-0.72612 0.07608-0.28081
   6  -2   7   90.78    9.50  13 0.98571-0.84671 0.16061-0.28629 0.07656 0.42615
   6  10   4   20.80    8.92  13 0.98567-0.85227 0.16073 0.46775 0.07689 0.21179
  16  -4  -8   50.13   15.97  13 0.98556-0.66487 0.16111-0.41253 0.07785-0.63990
  10  10   7    1.77   14.88  13 0.98556-0.76263 0.16111 0.46737 0.07785 0.42705
   8  -2  -6   90.65   10.48  13 0.98556-0.82901 0.16111-0.28683 0.07785-0.50161
   7  11   3   73.47    9.30  13 0.98539-0.83289 0.16167 0.52967 0.07931 0.13858
  15  -5  -7   66.80   14.60  13 0.98537-0.68380 0.16173-0.47602 0.07947-0.57072
  15  -5   9   30.25   10.49  13 0.98537-0.65383 0.16173-0.47595 0.07947 0.57088
  14  -8  -3  205.35   12.63  13 0.98532-0.69725 0.16192-0.66477 0.07995-0.28633
   8  -6   4  342.58   10.32  13 0.98530-0.80997 0.16198-0.53907 0.08011 0.20968
   9  -3   8   93.62   10.92  13 0.98528-0.78150 0.16204-0.35058 0.08027 0.49545
  12  10   8   98.62   19.28  13 0.98526-0.71854 0.16210 0.46639 0.08044 0.49694
   4   2  -5  168.00    9.31  13 0.98524-0.91069 0.16216-0.03646 0.08060-0.43517
   5  -1   7  208.17   12.32  13 0.98522-0.86717 0.16223-0.22506 0.08076 0.42140
   9  -7   0  614.60   17.92  13 0.98520-0.79640 0.16229-0.60225 0.08092-0.07598
  19  -9  -4  113.00   13.89  13 0.98506-0.59393 0.16272-0.72840 0.08205-0.35702
   6   4  -6    4.62    6.23  13 0.98506-0.87042 0.16272 0.08868 0.08205-0.50687
   3   7   5  156.77   11.36  13 0.98505-0.91273 0.16279 0.27716 0.08221 0.27617
  12  -8  -1   78.23    7.49  13 0.98503-0.73518 0.16285-0.66569 0.08237-0.14714
   7  -3   7   25.88    7.86  13 0.98501-0.82504 0.16291-0.35145 0.08253 0.42074
   8   2  -7   36.79    9.16  13 0.98501-0.83030 0.16291-0.03721 0.08253-0.57762
  16  -4  10  -19.55   13.55  13 0.98499-0.63058 0.16297-0.41434 0.08269 0.63954
   2   0  -331308.20  785.14  13 0.98497-0.94865 0.16304-0.16304 0.08286-0.29582
   4   8   5    6.16    8.52  13 0.98495-0.89163 0.16310 0.33968 0.08302 0.27591
   9  -1   9   12.18   11.20  13 0.98495-0.77923 0.16310-0.22592 0.08302 0.56401
  20  -4  -9  -17.12   22.50  13 0.98493-0.58219 0.16316-0.41460 0.08318-0.71440
  10  -2   9   41.45   11.16  13 0.98493-0.75827 0.16316-0.28884 0.08318 0.56442
  12   6  -8    6.98    9.41  13 0.98493-0.74817 0.16316 0.21396 0.08318-0.64743
  13   7  -8   41.33    9.66  13 0.98491-0.72716 0.16322 0.27675 0.08334-0.64703
  15  -9  -1  131.45    9.05  13 0.98485-0.67206 0.16341-0.72911 0.08382-0.14694
  13  -7  -4   44.39   10.52  13 0.98483-0.71960 0.16347-0.60346 0.08398-0.36226
  15  -1  11   28.83   16.99  13 0.98477-0.64950 0.16366-0.22650 0.08447 0.70859
  24  -8  -7  -41.01   23.89  13 0.98477-0.49436 0.16366-0.66650 0.08447-0.57077
   1   3   5  369.04   15.03  13 0.98473-0.95438 0.16378 0.02477 0.08479 0.27250
  18 -10   0  255.03   11.89  13 0.98469-0.60707 0.16391-0.79243 0.08511-0.07523
   6   0   8   93.07   11.98  13 0.98467-0.84378 0.16397-0.16395 0.08528 0.48878
   2   8   1   31.75    4.70  13 0.98465-0.94080 0.16403 0.33877 0.08544-0.01299
   8  10   6  -27.64   12.13  13 0.98463-0.80552 0.16409 0.46438 0.08560 0.34687
  15  -7  -5  161.10   14.17  13 0.98461-0.67928 0.16416-0.60414 0.08576-0.43429
   7  11  -1  233.75    8.65  13 0.98457-0.83956 0.16428 0.52707 0.08608-0.15358
  13   9  -7    6.90    7.84  13 0.98453-0.72488 0.16440 0.40126 0.08640-0.57873
  14   0  11   30.62   18.14  13 0.98451-0.67021 0.16447-0.16446 0.08656 0.70593
  11   1  -8   61.37   11.83  13 0.98451-0.76872 0.16447-0.10162 0.08656-0.65136
  18  -8  -5  150.38   15.23  13 0.98444-0.61621 0.16465-0.66752 0.08705-0.43395
  17  -7   8   -0.42    8.29  13 0.98436-0.61275 0.16490-0.60484 0.08769 0.49242
  13   3  11   33.29   18.53  13 0.98434-0.69103 0.16496 0.02359 0.08786 0.70410
   1   7   1  431.68   13.78  13 0.98430-0.96144 0.16509 0.27487 0.08818-0.01628
  16  -2  11  -13.33   17.35  13 0.98426-0.62801 0.16521-0.29090 0.08850 0.70510
  10   4  10   -2.15   14.90  13 0.98413-0.75556 0.16558 0.08581 0.08947 0.62944
  14   2  -9  -12.74   13.13  13 0.98411-0.70724 0.16564-0.03994 0.08963-0.72412
   2   6   5  392.36   16.29  13 0.98405-0.93272 0.16583 0.21127 0.09011 0.26772
   8   0   9   71.09   11.65  13 0.98405-0.79936 0.16583-0.16582 0.09011 0.55640
   6   2  -6  202.67   10.98  13 0.98403-0.86938 0.16589-0.04019 0.09027-0.51509
   2   8   2  326.15   12.50  13 0.98403-0.93830 0.16589 0.33690 0.09027 0.05352
   2   2   6  533.55   19.77  13 0.98401-0.93082 0.16595-0.04025 0.09043 0.33875
  16  -8  -4   -2.75   10.46  13 0.98401-0.65586 0.16595-0.66882 0.09043-0.36708
  25  -9  -6   38.92   21.56  13 0.98399-0.47076 0.16602-0.73176 0.09060-0.50502
  11  -3   9    6.53    9.90  13 0.98388-0.73624 0.16633-0.35485 0.09140 0.55675
   5   9   5   -3.59    8.11  13 0.98384-0.86958 0.16645 0.39920 0.09172 0.26776
  12  -6   7   73.50    8.13  13 0.98382-0.71897 0.16651-0.54360 0.09188 0.41414
  15  -3  -8   29.34   11.18  13 0.98377-0.68405 0.16664-0.35520 0.09221-0.65479
   1   7   2   91.93    6.55  13 0.98373-0.95897 0.16676 0.27318 0.09253 0.05072
  18  -6  -7  -16.95   11.29  13 0.98371-0.61920 0.16682-0.54397 0.09269-0.58230
   7  -5   5 2199.40   57.78  13 0.98369-0.82747 0.16688-0.48113 0.09285 0.26773
   5   3   8  238.64   13.83  13 0.98369-0.86377 0.16688 0.02167 0.09285 0.48064
   9  -5  -4 2840.17   76.07  13 0.98362-0.80233 0.16707-0.48135 0.09334-0.37382
   6  -4  -3  929.77   27.12  13 0.98360-0.86338 0.16713-0.41856 0.09350-0.30427
   4   0   7   16.96    6.24  13 0.98358-0.88657 0.16719-0.16719 0.09366 0.40798
  20 -10  -2  289.46   16.44  13 0.98356-0.56772 0.16725-0.79579 0.09382-0.22554
  21  -7  -7   61.07   14.33  13 0.98356-0.55611 0.16725-0.60727 0.09382-0.58179
  19  -5  -8   31.57   13.09  13 0.98354-0.59990 0.16732-0.48160 0.09398-0.65438
  13   1  11   26.60   13.57  14 0.98352-0.69015 0.16738-0.10452 0.09414 0.69776
  13  -5  -6   22.04    8.78  14 0.98349-0.72203 0.16744-0.48174 0.09430-0.51531
   7   3   9   12.95    9.33  14 0.98338-0.81965 0.16775 0.02080 0.09511 0.55084
   7   7   8    6.20    9.53  14 0.98336-0.82153 0.16781 0.27213 0.09527 0.47935
  11   3  -8  102.07   10.28  14 0.98330-0.76752 0.16800 0.02056 0.09575-0.66056
   2   4   6  149.70    9.63  14 0.98330-0.93004 0.16800 0.08340 0.09575 0.33341
   0   2   4 1567.86   43.16  14 0.98323-0.97574 0.16818-0.04248 0.09623 0.18916
  24 -10  -4   28.10   16.21  14 0.98310-0.48710 0.16855-0.79713 0.09720-0.36945
  15   5  -9   -8.73   12.60  14 0.98307-0.68523 0.16861 0.14565 0.09736-0.73131
   1   1   5  558.99   18.72  14 0.98307-0.95269 0.16861-0.10576 0.09736 0.25992
  10  -4   8  148.65   11.55  14 0.98303-0.75823 0.16874-0.42011 0.09768 0.47857
   8   8   8   29.35   12.55  14 0.98298-0.80014 0.16886 0.33392 0.09801 0.47715
  20  -8   8   -6.28    9.50  14 0.98296-0.54839 0.16892-0.67168 0.09817 0.48358
  19  -3  -9  -22.42   18.24  14 0.98294-0.60120 0.16899-0.35758 0.09833-0.73012
  22  -6  -8   15.41   20.75  14 0.98292-0.53634 0.16905-0.54619 0.09849-0.65725
   9   5  -7  706.19   23.37  14 0.98292-0.80723 0.16905 0.14522 0.09849-0.59303
   6   6   8  206.55   15.84  14 0.98292-0.84200 0.16905 0.20803 0.09849 0.47555
   3   9   1   42.52    5.31  14 0.98287-0.91804 0.16917 0.39648 0.09881-0.02581
   3   1  -4  498.48   16.42  14 0.98285-0.92742 0.16923-0.10639 0.09897-0.38274
  11  11   7   52.71   17.28  14 0.98285-0.73892 0.16923 0.52207 0.09897 0.40647
  12   0  -8   27.41   12.04  14 0.98285-0.74612 0.16923-0.16925 0.09897-0.66325
  14  -6   8   15.27    8.64  14 0.98280-0.67411 0.16936-0.54643 0.09929 0.47916
  17  -3  11   14.53   16.48  14 0.98278-0.60554 0.16942-0.35795 0.09946 0.69468
  11  -1  10   35.58   13.59  14 0.98273-0.73319 0.16954-0.23236 0.09978 0.61968
   4  -2   6  246.25   11.64  14 0.98271-0.88753 0.16960-0.29529 0.09994 0.33033
  13   5  11   -1.52   20.13  14 0.98267-0.68930 0.16973 0.14451 0.10026 0.69163
  11  -5  -5   59.74   11.12  14 0.98262-0.76120 0.16985-0.48411 0.10058-0.45130
  14  -4  -7   48.05   14.06  14 0.98262-0.70202 0.16985-0.42128 0.10058-0.59237
   3   9   2  393.98   14.55  14 0.98260-0.91588 0.16991 0.39573 0.10074 0.04360
   8  -4   7   40.53    7.81  14 0.98257-0.80164 0.16997-0.42136 0.10090 0.40293
  14  -2  -8   70.10   14.75  14 0.98257-0.70386 0.16997-0.29570 0.10090-0.66407
   5   7   7   -3.36   10.66  14 0.98255-0.86456 0.17003 0.26991 0.10107 0.40112
   5   1   8   46.38   11.03  14 0.98244-0.86256 0.17034-0.10749 0.10187 0.47165
  22 -10  -3    7.50   13.36  14 0.98239-0.52647 0.17047-0.79902 0.10219-0.30418
  21  -9   7   -7.48    7.04  14 0.98234-0.52868 0.17059-0.73623 0.10251 0.40846
   6   8   7   14.99   11.79  14 0.98234-0.84333 0.17059 0.33219 0.10251 0.40020
   3   3   7   -2.03    9.35  14 0.98234-0.90623 0.17059 0.01796 0.10251 0.39854
   7  11   4  149.48   12.51  14 0.98232-0.82795 0.17065 0.52068 0.10268 0.18656
   0   4   4  273.89   12.48  14 0.98230-0.97477 0.17071 0.08069 0.10284 0.18255
  16   6  -9   38.40   15.51  14 0.98230-0.66349 0.17071 0.20641 0.10284-0.73627
   7   1   9   -8.85   11.72  14 0.98223-0.81850 0.17090-0.10804 0.10332 0.54263
  20  -6  10   10.36   14.38  14 0.98223-0.54390 0.17090-0.54795 0.10332 0.62110
  13  -1  -8   -9.35   13.58  14 0.98220-0.72446 0.17096-0.23383 0.10348-0.66719
   3  -3  -1 3953.77  100.58  14 0.98220-0.92115 0.17096-0.35952 0.10348-0.17319
  10  12   5    2.07   13.36  14 0.98220-0.76299 0.17096 0.58319 0.10348 0.25873
   8  12   1   84.02    7.78  14 0.98213-0.81241 0.17114 0.58305 0.10396-0.02822
   2   8   0  688.11   19.54  14 0.98213-0.94015 0.17114 0.33166 0.10396-0.10286
   9  -7   1  640.18   17.74  14 0.98206-0.79138 0.17133-0.61128 0.10445-0.02815
  15   1  -9   30.79   14.58  14 0.98199-0.68414 0.17151-0.10867 0.10493-0.73887
   8  12   2  114.23    9.38  14 0.98194-0.81034 0.17163 0.58255 0.10525 0.04184
   3  -1   6 1085.52   32.26  14 0.98187-0.90770 0.17182-0.23466 0.10573 0.32400
   2  -2   4 1734.88   46.26  14 0.98187-0.93240 0.17182-0.29751 0.10573 0.18076
   2   8   3 1066.61   31.79  14 0.98180-0.93422 0.17200 0.33080 0.10622 0.10893
   5  -3   6  236.85   11.12  14 0.98180-0.86564 0.17200-0.36053 0.10622 0.32461
   4   6   7   55.44   11.26  14 0.98177-0.88475 0.17207 0.20503 0.10638 0.39525
   6  10   5   41.23   10.21  14 0.98165-0.84635 0.17237 0.45609 0.10718 0.25284
   1   5   5  100.80    9.42  14 0.98153-0.95117 0.17268 0.14157 0.10799 0.24930
  10  -6   6   46.91    5.71  14 0.98151-0.76049 0.17274-0.54983 0.10815 0.32544
   9   1  -7  221.12   13.70  14 0.98148-0.80577 0.17280-0.10995 0.10831-0.60283
   5   5   8  435.85   21.20  14 0.98143-0.86155 0.17292 0.14132 0.10863 0.46489
  18  -2  -9   69.31   18.21  14 0.98143-0.62067 0.17292-0.29866 0.10863-0.74096
  11  -7   5  195.28    7.34  14 0.98143-0.74129 0.17292-0.61286 0.10863 0.25415
  22  -8  -6   21.35   17.22  14 0.98141-0.53108 0.17299-0.67582 0.10879-0.52482
   1   7   3  221.56   10.86  14 0.98141-0.95479 0.17299 0.26696 0.10879 0.10580
  12  -4   9   16.43   10.30  14 0.98136-0.71273 0.17311-0.42447 0.10911 0.53958
  12   8  -7   11.64    7.31  14 0.98134-0.74267 0.17317 0.32964 0.10927-0.60214
  12   4  11   44.99   20.22  14 0.98134-0.70896 0.17317 0.07822 0.10927 0.68209
   7   9   7    3.72   12.80  14 0.98119-0.82118 0.17354 0.39208 0.11024 0.39302
  26  -8  -7   49.46   29.44  14 0.98119-0.44885 0.17354-0.67643 0.11024-0.59548
  17  -5  10   -2.42   12.34  14 0.98116-0.60581 0.17360-0.48784 0.11040 0.61242
   0   6   2  715.35   21.46  14 0.98114-0.97738 0.17366 0.20344 0.11056 0.03214
   1   7   0  326.70   10.28  14 0.98114-0.96015 0.17366 0.26629 0.11056-0.11001
  23  -9  -5   18.94   18.01  14 0.98111-0.50798 0.17372-0.73947 0.11072-0.45489
  -1   3   2 2939.66   76.02  14 0.98104-0.99826 0.17391 0.01465 0.11120 0.03095
  11   9   9  -29.37   19.36  14 0.98096-0.73331 0.17409 0.39153 0.11168 0.53645
   0   6   1   31.35    4.37  14 0.98096-0.97907 0.17409 0.20301 0.11168-0.04033
  13  -3  10   28.53   12.63  14 0.98094-0.68946 0.17415-0.36267 0.11185 0.60873
   2  -2  -1  160.14   12.58  14 0.98091-0.94084 0.17421-0.29992 0.11201-0.18226
   3  -3   4  774.82   22.11  14 0.98086-0.91042 0.17434-0.36288 0.11233 0.17471
  16  -6  -6   26.32   13.70  14 0.98086-0.65646 0.17434-0.55150 0.11233-0.53169
   5   5  -5  618.03   18.64  14 0.98084-0.88530 0.17440 0.13986 0.11249-0.46650
  16   0  -9   -2.63   14.47  14 0.98084-0.66206 0.17440-0.17442 0.11249-0.74595
  10   6  -7   46.77    8.54  14 0.98074-0.78403 0.17464 0.20247 0.11313-0.60710
   3  -1  -318204.70  457.87  14 0.98074-0.92342 0.17464-0.23750 0.11313-0.32554
   5  -3  -3 2556.65   67.56  14 0.98069-0.88142 0.17476-0.36333 0.11345-0.32477
  -1   3   1   24.43    4.05  14 0.98066-0.99977 0.17483 0.01373 0.11361-0.04281
  17  -1  -9   47.15   16.98  14 0.98066-0.64085 0.17483-0.23769 0.11361-0.74647
   3   1   7   18.70    8.74  14 0.98066-0.90460 0.17483-0.11197 0.11361 0.38746
   7   5  -6   65.81    7.21  14 0.98061-0.84501 0.17495 0.13931 0.11393-0.53822
  15   3  -9   20.82   13.95  14 0.98056-0.68270 0.17507 0.01348 0.11426-0.74819
   3   9   3   77.51    8.70  14 0.98056-0.91200 0.17507 0.39058 0.11426 0.10144
  15  -9   0  146.55    8.51  14 0.98056-0.66589 0.17507-0.74076 0.11426-0.10602
  11  -7  -2   58.70    7.72  14 0.98046-0.75342 0.17532-0.61528 0.11490-0.25156
  10  -6  -3  225.14   11.68  14 0.98041-0.77623 0.17544-0.55255 0.11522-0.32378
  12   8  10   23.66   21.14  14 0.98041-0.70991 0.17544 0.32734 0.11522 0.60481
  18  -4  -8   81.38   18.34  14 0.98038-0.61773 0.17550-0.42694 0.11538-0.67635
  13  -3  -7  137.82   14.38  14 0.98025-0.72062 0.17580-0.36437 0.11618-0.60852
  19  -7  -6  104.55   16.70  14 0.98020-0.59282 0.17593-0.61591 0.11651-0.53420
   8  12   3   35.75    8.70  14 0.98015-0.80666 0.17605 0.57813 0.11683 0.10161
  11   9  -6   41.46    6.05  14 0.98010-0.76054 0.17617 0.38949 0.11715-0.53922
  11   7  -7   80.08    8.78  14 0.98010-0.76244 0.17617 0.26380 0.11715-0.61059
  12  -8   0  240.12    9.80  14 0.98007-0.72833 0.17623-0.67906 0.11731-0.11072
  12  -4  -6    5.43   11.15  14 0.98007-0.73960 0.17623-0.42768 0.11731-0.53888
   1  -1   4  828.73   24.19  14 0.98002-0.95154 0.17635-0.23920 0.11763 0.16831
  18  -4  11  -13.65   17.00  14 0.97989-0.58166 0.17666-0.42803 0.11843 0.67624
  19  -7   9   33.56   11.52  14 0.97983-0.56438 0.17678-0.61671 0.11876 0.53380
  17  -9  -2  773.27   25.59  14 0.97981-0.62690 0.17684-0.74251 0.11892-0.25228
   3   5   7  110.13   11.98  14 0.97975-0.90367 0.17697 0.13728 0.11924 0.38183
   4   8   6   25.72   10.84  14 0.97970-0.88452 0.17709 0.32570 0.11956 0.31072
  17   9  -8   69.28   12.78  14 0.97965-0.63797 0.17721 0.38847 0.11988-0.68137
   3   7   6    1.54    9.51  14 0.97962-0.90542 0.17727 0.26267 0.12004 0.30969
  10  10   8   -0.63   17.38  14 0.97962-0.75481 0.17727 0.45119 0.12004 0.45620
   3   9   0  332.58   11.18  14 0.97962-0.91665 0.17727 0.38837 0.12004-0.11839
  16  -6   9   13.74    9.51  14 0.97957-0.62705 0.17739-0.55447 0.12036 0.53055
   4   6  -4  310.04    9.93  14 0.97957-0.90314 0.17739 0.19972 0.12036-0.40357
  12   4  -8  121.82   12.27  14 0.97957-0.74281 0.17739 0.07402 0.12036-0.68462
  17  -5  -7   90.03   15.87  14 0.97946-0.63590 0.17764-0.49191 0.12100-0.61113
   8  -4  -4 1472.09   42.02  14 0.97946-0.81913 0.17764-0.42906 0.12100-0.40202
   2   0   6  916.97   28.84  14 0.97943-0.92625 0.17770-0.17769 0.12116 0.30803
   9   3  -7   87.83   10.03  14 0.97943-0.80375 0.17770 0.01086 0.12116-0.61571
   4  -2  -3  297.86   11.90  14 0.97941-0.90111 0.17776-0.30347 0.12132-0.33318
   8  12   0  119.75    7.54  14 0.97938-0.81154 0.17782 0.57638 0.12149-0.11709
   7   1  -6  161.58   10.73  14 0.97930-0.84369 0.17800-0.11516 0.12197-0.54624
   4  10   2    2.54    5.85  14 0.97930-0.89159 0.17800 0.45048 0.12197 0.02293
   6   2   9   53.51   12.78  14 0.97927-0.83655 0.17806-0.05236 0.12213 0.52329
   5   1  -5   71.00    8.35  14 0.97919-0.88367 0.17825-0.11540 0.12261-0.47663
  12   2  -8  211.64   14.45  14 0.97916-0.74244 0.17831-0.05261 0.12277-0.68705
  10   0  -7   51.74   10.83  14 0.97914-0.78244 0.17837-0.17837 0.12293-0.61691
  15   1  12   -6.86   19.85  14 0.97906-0.64189 0.17855-0.11569 0.12341 0.74096
  13  -1  11  -25.83   15.66  14 0.97906-0.68571 0.17855-0.24138 0.12341 0.66851
   3   3  -4  615.78   18.32  14 0.97903-0.92358 0.17861 0.00994 0.12357-0.40733
   8  10   7   13.63   12.24  14 0.97900-0.79801 0.17867 0.44979 0.12373 0.38007
   6   4   9   49.49   10.82  14 0.97897-0.83621 0.17873 0.07266 0.12389 0.52150
   0   6   3  243.45   10.54  14 0.97895-0.97331 0.17879 0.19830 0.12405 0.08999
  11   3  11    4.51   13.91  14 0.97895-0.72752 0.17879 0.00976 0.12405 0.66674
  23  -7  -7   53.88   17.13  14 0.97895-0.50956 0.17879-0.61884 0.12405-0.61096
   4   2   8   13.15    7.83  14 0.97892-0.88002 0.17886-0.05315 0.12421 0.44876
   7  -5  -2  111.69    7.86  14 0.97892-0.83583 0.17886-0.49313 0.12421-0.26308
  21  -9  -4   35.69   12.73  14 0.97889-0.54584 0.17892-0.74465 0.12437-0.39828
   4  10   1   19.24    5.76  14 0.97876-0.89295 0.17922 0.44928 0.12518-0.05163
  14  -6  -5   11.27    8.30  14 0.97876-0.69445 0.17922-0.55638 0.12518-0.47429
  12   0  11    7.74   11.41  14 0.97873-0.70637 0.17928-0.17927 0.12534 0.66604
  12  -2  -7   77.17    9.71  14 0.97867-0.74003 0.17940-0.30512 0.12566-0.61855
  24  -6  -8   70.99   17.84  14 0.97867-0.49017 0.17940-0.55659 0.12566-0.68338
  10  -4  -5 1090.80   33.06  14 0.97864-0.77821 0.17946-0.43088 0.12582-0.47709
  21  -5  -8   65.63   14.95  14 0.97862-0.55303 0.17952-0.49382 0.12598-0.68530
   4   4   8  275.03   15.09  14 0.97862-0.87966 0.17952 0.07187 0.12598 0.44696
   5   9   6   45.63    8.84  14 0.97859-0.86243 0.17959 0.38605 0.12614 0.30469
   8  -6  -1  324.09   11.66  15 0.97853-0.81258 0.17971-0.55682 0.12646-0.19342
  14  -8  -2  161.48   10.75  15 0.97837-0.68839 0.18007-0.68289 0.12742-0.26244
  -1   3   3 1597.31   43.24  15 0.97834-0.99368 0.18013 0.00842 0.12758 0.08591
   6  -4   6  242.57   11.06  15 0.97831-0.84120 0.18019-0.43158 0.12774 0.30364
  14  -2  11   19.56   14.48  15 0.97831-0.66398 0.18019-0.30586 0.12774 0.66472
  20  -8  -5  200.56   15.28  15 0.97828-0.56806 0.18025-0.68311 0.12790-0.47370
   2   8   4  109.23    9.16  15 0.97825-0.92876 0.18031 0.32247 0.12807 0.15842
  20  -6  -7    6.02   11.71  15 0.97825-0.57181 0.18031-0.55750 0.12807-0.61661
  12  -6  -4  142.47   10.27  15 0.97823-0.73395 0.18038-0.55749 0.12823-0.40704
  11  -1  -7   49.03    8.84  15 0.97823-0.76057 0.18038-0.24324 0.12823-0.62167
   2   6   6   54.83    7.88  15 0.97820-0.92500 0.18044 0.19666 0.12839 0.30080
  11  -5   8   31.68    8.89  15 0.97820-0.73245 0.18044-0.49467 0.12839 0.44844
  19  -9  -3   89.49   11.85  15 0.97811-0.58512 0.18062-0.74630 0.12887-0.33249
   1   3   6  272.57   12.71  15 0.97809-0.94586 0.18068 0.00787 0.12903 0.29961
   7  11   5   10.51    9.71  15 0.97806-0.82178 0.18074 0.51057 0.12919 0.23138
  12   6  11   -2.55   18.01  15 0.97803-0.70570 0.18080 0.19630 0.12935 0.66207
  21  -3  -9   49.23   19.51  15 0.97803-0.55434 0.18080-0.36941 0.12935-0.76007
  20 -10  -1   46.38   10.37  15 0.97794-0.56023 0.18098-0.80951 0.12983-0.19020
   8   2  10   51.24   13.23  15 0.97794-0.79132 0.18098-0.05527 0.12983 0.58798
  14  -4  10   15.39   11.78  15 0.97783-0.66542 0.18122-0.43262 0.13047 0.59070
   8   4  10   14.48   14.60  15 0.97772-0.79113 0.18147 0.06993 0.13111 0.58672
   1   7   4   38.55    7.40  15 0.97769-0.94920 0.18153 0.25842 0.13127 0.15467
   4  10   3  238.53   12.23  15 0.97763-0.88808 0.18165 0.44684 0.13159 0.08465
  17  -3  -8   58.34   15.57  15 0.97757-0.63594 0.18177-0.37037 0.13191-0.69347
  11   1  11  -25.29   16.31  15 0.97740-0.72605 0.18213-0.11928 0.13288 0.65798
  16   4  -9   -3.43   13.79  15 0.97740-0.65858 0.18213 0.06927 0.13288-0.76629
  28  -8  -7    1.47   34.39  15 0.97737-0.40305 0.18219-0.68507 0.13304-0.61716
  14   2  12   -2.69   21.57  15 0.97734-0.66112 0.18226-0.05655 0.13320 0.73058
  17  -7  -5   43.23   12.56  15 0.97731-0.63005 0.18232-0.62233 0.13336-0.48081
  16   2  -9    4.53   14.31  15 0.97717-0.65833 0.18262-0.05692 0.13416-0.76755
   3   9   4  230.95   12.83  15 0.97717-0.90669 0.18262 0.38301 0.13416 0.15288
   4   0  -4  758.77   23.09  15 0.97714-0.90073 0.18268-0.18269 0.13432-0.41754
  11  -3  -6  209.65   14.34  15 0.97714-0.75764 0.18268-0.37127 0.13432-0.55643
   9  -5   7   20.35    7.01  15 0.97705-0.77512 0.18286-0.49709 0.13480 0.36957
   8  12   4   28.62   10.81  15 0.97702-0.80169 0.18292 0.57128 0.13496 0.15483
   9   9  -5   44.73    4.66  15 0.97693-0.79748 0.18310 0.38257 0.13544-0.48726
   8   6  -6   75.53    7.20  15 0.97690-0.82030 0.18316 0.19395 0.13560-0.55933
   0   2   5   23.78    7.92  15 0.97687-0.96746 0.18322-0.05752 0.13576 0.22097
   0   4   5  610.79   21.16  15 0.97658-0.96722 0.18383 0.06757 0.13736 0.21938
  13   5  -8    0.22   10.60  15 0.97649-0.71874 0.18401 0.13025 0.13784-0.70155
  13  -5   9   13.93    9.78  15 0.97640-0.68679 0.18419-0.49840 0.13832 0.51092
   1   1  -2  246.08    8.23  15 0.97640-0.95917 0.18419-0.12134 0.13832-0.28048
  13  -7  -3   48.86    9.62  15 0.97628-0.70916 0.18443-0.62440 0.13896-0.34588
  16  10  -7    3.34    8.81  15 0.97628-0.65370 0.18443 0.44409 0.13896-0.62965
  24  -8  -6   67.92   19.66  15 0.97625-0.48397 0.18449-0.68735 0.13912-0.55408
   7   3  -6  159.91    9.91  15 0.97625-0.84064 0.18449 0.00406 0.13912-0.56340
   6  10   6  142.99   14.39  15 0.97625-0.83910 0.18449 0.44398 0.13912 0.29225
  15  -3  11   19.46   15.79  15 0.97625-0.64092 0.18449-0.37300 0.13912 0.65388
   7  -1   9   18.95   11.36  15 0.97619-0.81243 0.18461-0.24744 0.13944 0.50650
  13   1  -8    5.90   12.04  15 0.97612-0.71837 0.18473-0.12189 0.13976-0.70346
   2   2   7  170.52   12.12  15 0.97612-0.92103 0.18473-0.05903 0.13976 0.36076
  16   8  -8   79.53   12.92  15 0.97609-0.65540 0.18479 0.31803 0.13992-0.70198
   8   0  -6  119.55   10.59  15 0.97609-0.81953 0.18479-0.18481 0.13992-0.56368
  18  -8  -4   29.38   12.11  15 0.97606-0.60593 0.18485-0.68770 0.14008-0.41562
  10   8  -6    7.06    5.54  15 0.97606-0.77752 0.18485 0.31797 0.14008-0.56272
   2   4   7  151.41   12.47  15 0.97597-0.92087 0.18504 0.06636 0.14056 0.35995
   8  -2   9   26.31   11.01  15 0.97594-0.79123 0.18510-0.31077 0.14072 0.50577
   7  -3  -4  757.58   24.12  15 0.97594-0.83662 0.18510-0.37368 0.14072-0.42231
  25  -9  -5   17.68   18.81  15 0.97576-0.46063 0.18546-0.75116 0.14168-0.48473
  20  -2  -9   29.98   20.25  15 0.97576-0.57302 0.18546-0.31118 0.14168-0.77291
  24 -10  -3   60.36   16.24  15 0.97576-0.47788 0.18546-0.81401 0.14168-0.34257
  16  -8  -3   10.34    9.59  15 0.97570-0.64565 0.18558-0.68841 0.14200-0.34728
   6  -2   8   86.93   10.71  15 0.97570-0.83483 0.18558-0.31126 0.14200 0.43206
   5  -1   8   81.67   11.15  15 0.97564-0.85576 0.18570-0.24854 0.14232 0.43120
   0   0   4  244.44   11.63  15 0.97545-0.96814 0.18606-0.18609 0.14328 0.14214
   9  11   7   25.28   15.72  15 0.97545-0.77385 0.18606 0.50549 0.14328 0.36124
  15  -5  -6    2.35   12.21  15 0.97530-0.67159 0.18636-0.50045 0.14408-0.56376
  22 -10  -2  140.10   13.51  15 0.97520-0.51726 0.18654-0.81485 0.14456-0.27511
   9  -3  -5  120.86   10.95  15 0.97514-0.79548 0.18666-0.37513 0.14488-0.49657
   5   7   8   47.37   13.50  15 0.97514-0.85561 0.18666 0.25338 0.14488 0.42881
   5   3  -5  607.18   19.25  15 0.97511-0.87939 0.18672 0.00183 0.14504-0.49896
   1   1   6 2526.66   69.12  15 0.97511-0.94313 0.18672-0.12390 0.14504 0.28367
  10  -2  -6  387.70   17.24  15 0.97508-0.77628 0.18678-0.31240 0.14520-0.56766
   6   6  -5   48.06    5.09  15 0.97505-0.85838 0.18684 0.19023 0.14536-0.49874
   9   7  -6   49.01    6.54  15 0.97495-0.79719 0.18702 0.25288 0.14584-0.56889
  17   5  -9   16.71   14.24  15 0.97495-0.63491 0.18702 0.12719 0.14584-0.77841
   1   5   6   94.63   10.35  15 0.97492-0.94300 0.18708 0.12721 0.14600 0.28272
   6   0   9  188.95   14.42  15 0.97489-0.83250 0.18714-0.18721 0.14616 0.49946
   5   3   9   20.76   12.93  15 0.97483-0.85347 0.18726 0.00129 0.14648 0.49861
  17   1  -9   18.93   15.09  15 0.97483-0.63474 0.18726-0.12437 0.14648-0.77900
   4  -4   4   76.97    4.86  15 0.97480-0.88348 0.18732-0.43876 0.14664 0.14096
   6   0  -5 1050.38   31.21  15 0.97467-0.85793 0.18756-0.18752 0.14728-0.50062
  -1   1   2  246.66    9.56  15 0.97464-0.99197 0.18762-0.12478 0.14744-0.00529
   9  -1  -6   38.00    9.00  15 0.97461-0.79677 0.18768-0.25046 0.14760-0.57060
  14   6  -8   15.19   10.11  15 0.97448-0.69551 0.18792 0.18913 0.14824-0.71115
  -1   5   2  600.20   18.48  15 0.97442-0.99181 0.18804 0.12623 0.14856-0.00641
   9  -1  10   18.50   13.01  15 0.97438-0.76720 0.18810-0.25106 0.14872 0.56995
  14   0  -8  104.06   14.61  15 0.97438-0.69537 0.18810-0.18804 0.14872-0.71158
   4  10   4   49.07    8.91  15 0.97429-0.88316 0.18828 0.44035 0.14920 0.13843
  19  -1  -9   57.02   18.35  15 0.97422-0.59217 0.18840-0.25115 0.14952-0.78091
  20  -4  -8   -5.35   17.80  15 0.97416-0.56926 0.18852-0.43973 0.14984-0.70934
   0   6   0 1589.47   41.39  15 0.97403-0.97411 0.18876 0.18836 0.15048-0.15049
  12  -8   1  237.80    8.96  15 0.97400-0.72030 0.18882-0.69156 0.15064-0.07269
   5  -1  -4 2324.26   62.10  15 0.97393-0.87632 0.18894-0.25174 0.15096-0.43352
   4   6   8  210.20   16.48  15 0.97393-0.87540 0.18894 0.18823 0.15096 0.42219
  18  -6  10  -11.17   13.09  15 0.97393-0.57777 0.18894-0.56619 0.15096 0.57256
   9  -3   9   18.40   10.37  15 0.97390-0.76854 0.18900-0.37769 0.15112 0.49614
   4   0   8  386.94   18.19  15 0.97390-0.87531 0.18900-0.18906 0.15112 0.42200
  18   0  -9   20.03   16.20  15 0.97390-0.61283 0.18900-0.18893 0.15112-0.78307
   5   7  -4  269.40    8.75  15 0.97384-0.87633 0.18912 0.25081 0.15144-0.43406
  10  -2  10    0.27   12.80  15 0.97380-0.74557 0.18918-0.31499 0.15160 0.56757
  25  -7  -7   54.67   22.47  15 0.97380-0.46221 0.18918-0.62889 0.15160-0.63707
   7  -3   8   52.28   10.10  15 0.97377-0.81221 0.18924-0.37790 0.15176 0.42300
   6  -2  -4 2240.40   60.39  15 0.97374-0.85517 0.18930-0.31494 0.15192-0.43394
  -1   3   4   88.50    8.79  15 0.97364-0.98738 0.18948-0.00093 0.15240 0.13248
   3   3   8  207.66   14.90  15 0.97364-0.89611 0.18948-0.00093 0.15240 0.42021
   8   0  10    4.96   11.68  15 0.97364-0.78744 0.18948-0.18956 0.15240 0.56571
  14   0  12   12.26   20.58  15 0.97358-0.65775 0.18960-0.18969 0.15272 0.71149
  21  -7  -6  136.21   17.48  15 0.97358-0.54400 0.18960-0.62931 0.15272-0.56906
  15  -1  12   20.13   19.76  15 0.97351-0.63665 0.18972-0.25267 0.15304 0.71167
  10   2  -7   42.47   10.14  15 0.97348-0.77651 0.18978-0.06406 0.15320-0.64695
  10   4  -7 1237.19   36.84  15 0.97345-0.77654 0.18984 0.06155 0.15336-0.64716
   5  11   2  109.51    8.57  15 0.97341-0.86499 0.18990 0.50158 0.15352-0.00807
  13   3  -8  183.40   14.30  15 0.97335-0.71533 0.19002-0.00147 0.15384-0.71727
   4  10   0   49.72    5.03  15 0.97331-0.88950 0.19008 0.43848 0.15400-0.15182
   2   8   5  119.87   10.91  15 0.97322-0.92219 0.19026 0.31264 0.15447 0.20343
  18  -6  -6   63.82   13.48  15 0.97315-0.60649 0.19038-0.56727 0.15479-0.57279
  -1   5   3  848.66   25.50  15 0.97312-0.98870 0.19044 0.12384 0.15495 0.05856
  23  -5  -8   -6.35   18.56  15 0.97305-0.50522 0.19056-0.50457 0.15527-0.71310
   8  -2  -5  406.05   15.45  15 0.97298-0.81430 0.19068-0.31631 0.15559-0.50783
   2   2  -3  332.40   10.75  15 0.97282-0.93636 0.19098-0.06527 0.15639-0.36930
  -1   1   310444.00  263.83  15 0.97278-0.98828 0.19104-0.12820 0.15655 0.05696
   4   8   7   34.75    8.72  15 0.97272-0.87603 0.19116 0.31176 0.15687 0.34489
   7  -1  -5 1077.89   31.72  15 0.97268-0.83499 0.19122-0.25401 0.15703-0.50982
   5   5   9   23.27    9.85  15 0.97262-0.85123 0.19134 0.12296 0.15735 0.48773
   2  -2   5  564.70   17.80  15 0.97255-0.92142 0.19146-0.31722 0.15767 0.20022
  13   1  12  -26.87   15.80  15 0.97255-0.67771 0.19146-0.12866 0.15767 0.70599
   5  11   3  137.19   10.52  15 0.97248-0.86223 0.19158 0.49993 0.15799 0.05882
   8  12   5   17.08   11.06  15 0.97248-0.79560 0.19158 0.56284 0.15799 0.20323
   1   7   5   29.12    6.44  15 0.97245-0.94241 0.19163 0.24840 0.15815 0.19921
   5   1   9   18.62    8.15  16 0.97238-0.85101 0.19175-0.12895 0.15847 0.48662
   3   7   7   11.09    7.80  16 0.97238-0.89673 0.19175 0.24830 0.15847 0.34277
  17   3  -9   15.90   10.42  16 0.97238-0.63231 0.19175-0.00320 0.15847-0.79099
   2   4  -3  372.81   11.13  16 0.97238-0.93596 0.19175 0.05965 0.15847-0.37139
   7  11   6    1.59   10.23  16 0.97231-0.81455 0.19187 0.49967 0.15878 0.27326
  19  -5  -7   16.60   11.47  16 0.97231-0.58656 0.19187-0.50595 0.15878-0.64756
   3   9   5   24.43    7.14  16 0.97228-0.90025 0.19193 0.37383 0.15894 0.19951
  16  -4  11   22.53   14.17  16 0.97218-0.61616 0.19211-0.44366 0.15942 0.63442
  15  -5  10   29.26   11.85  16 0.97208-0.63887 0.19229-0.50668 0.15990 0.56198
   9  -5  -3  190.08    9.71  16 0.97204-0.78865 0.19235-0.50649 0.16006-0.36908
   4  -2   7  198.97   11.32  16 0.97197-0.87518 0.19247-0.31825 0.16038 0.34134
  22  -6  -7    4.87   14.15  16 0.97197-0.52330 0.19247-0.56936 0.16038-0.64750
  13  -5  -5  106.96    9.67  16 0.97194-0.70829 0.19253-0.50661 0.16054-0.50997
   7   5  10   51.64   12.14  16 0.97191-0.80675 0.19259 0.12172 0.16070 0.55690
   8   8  -5    0.70    4.32  16 0.97170-0.81310 0.19295 0.30982 0.16166-0.51395
   3  -1   7   46.48    8.28  16 0.97170-0.89593 0.19295-0.25587 0.16166 0.33953
   5   9   7   97.57   12.91  16 0.97163-0.85404 0.19307 0.37276 0.16198 0.34037
   7   1  10   18.81   12.81  16 0.97163-0.80638 0.19307-0.13026 0.16198 0.55556
  11  -3  10   43.40   11.97  16 0.97156-0.72235 0.19318-0.38186 0.16229 0.55743
  23  -9  -4   31.80   13.94  16 0.97156-0.49635 0.19318-0.75861 0.16229-0.43493
   1  -1   5  586.65   19.27  16 0.97153-0.94137 0.19324-0.25614 0.16245 0.19488
   7   7  -5   10.93    4.78  16 0.97149-0.83387 0.19330 0.24662 0.16261-0.51545
  15  -3  -7   56.62   12.91  16 0.97132-0.66947 0.19360-0.38202 0.16341-0.65439
   5  11   1   60.22    6.42  16 0.97132-0.86470 0.19360 0.49784 0.16341-0.08933
  -1   5   1   76.84    5.47  16 0.97122-0.99044 0.19378 0.12049 0.16389-0.09310
   3   5   8  137.64   13.58  16 0.97122-0.89367 0.19378 0.12052 0.16389 0.40871
  15  -7   8  -12.64    8.18  16 0.97111-0.64160 0.19396-0.63403 0.16437 0.41475
  10   6  11  -10.32   20.39  16 0.97111-0.74112 0.19396 0.18323 0.16437 0.62626
  22  -8  -5  108.19   16.51  16 0.97104-0.51862 0.19408-0.69661 0.16469-0.50915
  20 -10   0   43.63    8.83  16 0.97097-0.55128 0.19420-0.82256 0.16500-0.15399
   3   1   8   65.70   11.27  16 0.97073-0.89316 0.19461-0.13181 0.16612 0.40647
  26  -8  -6   81.64   22.24  16 0.97066-0.43622 0.19473-0.69726 0.16644-0.58003
   2   6   7   87.22   11.95  16 0.97055-0.91582 0.19491 0.18226 0.16692 0.33374
  13  -7   7   19.06    5.93  16 0.97048-0.68477 0.19503-0.63507 0.16723 0.33940
  12   2  12  -41.18   21.18  16 0.97041-0.69661 0.19515-0.06948 0.16755 0.69560
  11  -5  -4 1142.77   34.63  16 0.97038-0.74686 0.19520-0.50932 0.16771-0.44695
   3  -3   5  775.93   22.87  16 0.97034-0.89821 0.19526-0.38388 0.16787 0.19055
   6  -4  -2  873.14   25.52  16 0.97034-0.84808 0.19526-0.44661 0.16787-0.30723
  19  -3  -8   18.72   16.11  16 0.97023-0.58635 0.19544-0.38385 0.16835-0.72844
  27  -9  -5   69.16   21.81  16 0.97002-0.41272 0.19580-0.76111 0.16931-0.51100
   5  -3   7   34.31    8.09  16 0.96991-0.85212 0.19598-0.38461 0.16978 0.33248
   7  -5   6  660.88   20.36  16 0.96988-0.81193 0.19603-0.51036 0.16994 0.26204
  14  -4  -6   72.38   12.29  16 0.96984-0.68710 0.19609-0.44735 0.17010-0.59031
  11  -7  -1  174.33    8.86  16 0.96980-0.74078 0.19615-0.63601 0.17026-0.23553
  16  -8   7  107.88   15.96  16 0.96977-0.62110 0.19621-0.69911 0.17042 0.33786
  10  -4   9    0.55    9.79  16 0.96977-0.74335 0.19621-0.44773 0.17042 0.47734
   0   6   5  442.35   17.71  16 0.96966-0.96060 0.19639 0.18077 0.17090 0.18590
   4  10   5  103.70   11.44  16 0.96966-0.87669 0.19639 0.43226 0.17090 0.18811
   5  11   4   16.06    9.07  16 0.96966-0.85752 0.19639 0.49510 0.17090 0.11728
  -1   5   4  439.35   16.40  16 0.96952-0.98326 0.19663 0.11766 0.17153 0.11334
   2   0   7   20.70    8.89  16 0.96948-0.91470 0.19669-0.19674 0.17169 0.32894
   8  -4   8  713.89   24.35  16 0.96944-0.78685 0.19675-0.44826 0.17185 0.40344
   1   3   7  233.20   13.95  16 0.96941-0.93569 0.19680-0.00826 0.17201 0.32810
  11   1  -7    7.01   10.28  16 0.96934-0.75140 0.19692-0.13403 0.17233-0.66553
   0   4   6  164.52   11.88  16 0.96923-0.95830 0.19710 0.05432 0.17281 0.25537
   6  10   7   45.17   13.72  16 0.96923-0.83060 0.19710 0.43158 0.17281 0.33006
  15   9  -7   18.34    9.04  16 0.96904-0.66729 0.19740 0.36819 0.17360-0.66468
  18   2  -9   25.25   15.47  16 0.96882-0.60775 0.19775-0.07202 0.17456-0.80649
   4   4   9   -7.95   12.68  16 0.96882-0.86844 0.19775 0.05367 0.17456 0.46997
   0   2   6  268.83   13.99  16 0.96871-0.95777 0.19793-0.07225 0.17503 0.25313
  27  -7  -7   30.85   25.71  16 0.96868-0.41512 0.19799-0.63767 0.17519-0.65953
  21  -9  -3   22.25   11.98  16 0.96864-0.53352 0.19805-0.76349 0.17535-0.37776
  14   2  -8   74.48   13.01  16 0.96860-0.68960 0.19810-0.07238 0.17551-0.73837
   8  -6   5  288.19    9.71  16 0.96860-0.79149 0.19810-0.57526 0.17551 0.18565
  18  -8   8   11.18    7.75  16 0.96853-0.57606 0.19822-0.70116 0.17583 0.40493
  16  -6  -5   53.63   12.22  16 0.96853-0.64199 0.19822-0.57515 0.17583-0.52363
  14  -2  -7   75.45   13.05  16 0.96846-0.68755 0.19834-0.32392 0.17615-0.66765
   4   2   9  133.88   14.52  16 0.96842-0.86805 0.19840-0.07273 0.17631 0.46823
  18   4  -9   34.82   16.15  16 0.96842-0.60737 0.19840 0.05298 0.17631-0.80828
  19  -7  -5  202.64   16.74  16 0.96838-0.57888 0.19846-0.63816 0.17647-0.52257
  12  -6   8   72.15    9.13  16 0.96838-0.70184 0.19846-0.57569 0.17647 0.40101
  11   5  -7  671.49   23.02  16 0.96823-0.75032 0.19869 0.11553 0.17710-0.67032
   8   2  -6   75.23    9.00  16 0.96816-0.81136 0.19881-0.07310 0.17742-0.60100
  14   4  -8   17.64   10.88  16 0.96808-0.68907 0.19893 0.05245 0.17774-0.74059
  -1   1   4 1215.24   34.49  16 0.96805-0.98176 0.19899-0.13617 0.17790 0.10697
  19  -9  -2   87.96   11.68  16 0.96801-0.57298 0.19905-0.76450 0.17806-0.31024
  14  -8  -1  126.90    8.94  16 0.96786-0.67587 0.19928-0.70194 0.17869-0.24230
   0   0   5   75.39    8.41  16 0.96778-0.95866 0.19940-0.19945 0.17901 0.17778
  10  -6  -2   80.36   10.12  16 0.96778-0.76156 0.19940-0.57638 0.17901-0.31615
   9  11   8  -28.90   18.18  16 0.96771-0.76432 0.19952 0.49207 0.17933 0.39660
  19   9  -8  236.18   19.16  16 0.96763-0.58380 0.19964 0.36592 0.17964-0.73980
  22  -4  -8   34.63   19.76  16 0.96756-0.52069 0.19975-0.45094 0.17996-0.73832
  17  -7   9   39.51   10.42  16 0.96756-0.59422 0.19975-0.63985 0.17996 0.47162
  -1   3   5  533.74   19.23  16 0.96748-0.97939 0.19987-0.01132 0.18028 0.17597
  25  -5  -8   40.91   24.85  16 0.96741-0.45762 0.19999-0.51397 0.18060-0.73728
   8   4  -6  176.14   10.13  16 0.96733-0.81052 0.20011 0.05128 0.18092-0.60448
  21  -1  -9   22.02   21.28  16 0.96729-0.54326 0.20017-0.26289 0.18107-0.81129
  12   0  -7   75.21   12.17  16 0.96718-0.72828 0.20034-0.20028 0.18155-0.67420
  12  -4  10   28.61   12.41  16 0.96710-0.69688 0.20046-0.45200 0.18187 0.53838
  18  -2  -8   98.34   15.89  16 0.96707-0.60415 0.20052-0.32610 0.18203-0.74266
  13  -3  11   -1.63   14.83  16 0.96703-0.67398 0.20058-0.38927 0.18219 0.61001
  13  -1  -7  296.68   16.64  16 0.96695-0.70703 0.20070-0.26345 0.18250-0.67456
  14  -6   9   11.88    9.64  16 0.96691-0.65654 0.20075-0.57800 0.18266 0.46728
   2   8   6  378.06   18.35  16 0.96691-0.91404 0.20075 0.30215 0.18266 0.24661
  19   1  -9   15.49   16.59  16 0.96684-0.58481 0.20087-0.13797 0.18298-0.81438
   1   5   7  -31.14   10.01  16 0.96676-0.93308 0.20099 0.11331 0.18330 0.31682
   8  12   6   28.03   15.24  16 0.96672-0.78800 0.20105 0.55339 0.18346 0.24914
  23  -7  -6  104.45   18.61  16 0.96657-0.49505 0.20128-0.64099 0.18409-0.59932
  20  -8  -4   32.09   12.99  16 0.96653-0.55424 0.20134-0.70394 0.18425-0.45853
   2   4   8   54.80   12.20  16 0.96653-0.90993 0.20134 0.05008 0.18425 0.38777
  18  -4  -7    6.48   14.20  16 0.96653-0.60176 0.20134-0.45259 0.18425-0.67358
  20   0  -9   30.26   16.94  16 0.96637-0.56337 0.20158-0.20150 0.18488-0.81573
   3   9   6   31.39   11.23  16 0.96610-0.89230 0.20199 0.36381 0.18600 0.24384
   8   2  11  -22.93   14.88  16 0.96599-0.77797 0.20216-0.07650 0.18647 0.60305
  22 -10  -1   78.74   12.14  16 0.96599-0.50619 0.20216-0.83049 0.18647-0.24568
   1   7   6  158.57   12.43  16 0.96591-0.93405 0.20228 0.23776 0.18679 0.24194
   2   2   8  132.13   12.31  16 0.96587-0.90930 0.20234-0.07666 0.18695 0.38509
  24 -10  -2    4.12   12.68  16 0.96579-0.46590 0.20246-0.83075 0.18726-0.31670
  17  -5  -6  294.33   16.73  16 0.96564-0.61997 0.20269-0.51676 0.18790-0.60645
  15   1  -8  194.80   13.82  16 0.96564-0.66567 0.20269-0.13979 0.18790-0.75021
   7   7  10  -15.31   13.35  16 0.96556-0.80040 0.20281 0.23726 0.18822 0.52937
  12   0  12   25.49   17.02  16 0.96552-0.69169 0.20287-0.20297 0.18837 0.67474
  24  -6  -7  110.72   17.14  16 0.96552-0.47487 0.20287-0.57971 0.18837-0.67434
   8   8  10    5.18   13.91  16 0.96548-0.77930 0.20292 0.30001 0.18853 0.52958
  13  -1  12    5.79   16.58  16 0.96540-0.67053 0.20304-0.26600 0.18885 0.67476
  -1   3   0  387.73   10.72  16 0.96536-0.98639 0.20310-0.01455 0.18901-0.18957
   1   1   7    3.33    6.58  16 0.96532-0.93155 0.20316-0.14035 0.18917 0.31092
   7  11   7   -7.93   12.62  16 0.96528-0.80567 0.20322 0.48834 0.18933 0.31409
  12  -4  -5  261.33   13.04  16 0.96524-0.72263 0.20328-0.45455 0.18948-0.53950
   5  11   5   48.03    9.79  16 0.96520-0.85129 0.20333 0.48821 0.18964 0.16991
  28  -8  -6   24.25   19.16  16 0.96520-0.38881 0.20333-0.70584 0.18964-0.60211
  14  -6  -4   -1.88    7.27  16 0.96508-0.67863 0.20351-0.58043 0.19012-0.46768
  17  -1  -8  438.13   20.16  17 0.96504-0.62310 0.20357-0.26632 0.19028-0.75146
  10  -6   7   79.75    8.04  17 0.96504-0.74229 0.20357-0.58076 0.19028 0.31471
  13  -3  -6  165.01   11.58  17 0.96497-0.70318 0.20368-0.39209 0.19059-0.61133
  11   3  -7   53.63    7.84  17 0.96493-0.74701 0.20374-0.01519 0.19075-0.68396
   8  -6   0   76.09    5.53  17 0.96489-0.79697 0.20380-0.58085 0.19091-0.18650
   7   9   9   20.02   12.65  17 0.96481-0.80148 0.20392 0.36189 0.19123 0.45495
   6  12   3   40.44    9.27  17 0.96477-0.83353 0.20398 0.55040 0.19139 0.02596
  14   8  -7   29.08    9.04  17 0.96469-0.68390 0.20409 0.29865 0.19170-0.68332
  20  -6  -6  124.03   12.62  17 0.96465-0.55602 0.20415-0.58101 0.19186-0.60872
  21  -5  -7   91.15   13.66  17 0.96465-0.53694 0.20415-0.51821 0.19186-0.67952
  12   6  -7  264.58   13.30  17 0.96465-0.72581 0.20415 0.17292 0.19186-0.68458
   6  -4   7  153.00    9.69  17 0.96453-0.82575 0.20433-0.45583 0.19234 0.31047
  16   0  -8  138.10   12.92  17 0.96449-0.64353 0.20439-0.20431 0.19250-0.75424
   6  12   2   51.78    8.45  17 0.96437-0.83494 0.20456 0.54977 0.19297-0.04699
  11   1  12   36.66   18.60  17 0.96433-0.71146 0.20462-0.14183 0.19313 0.66941
   6   6  10   37.38   13.62  17 0.96433-0.82013 0.20462 0.17256 0.19313 0.52389
   6   2  -5   70.61    7.78  17 0.96425-0.84755 0.20474-0.07902 0.19345-0.54680
  12  -6  -3  200.31   11.37  17 0.96421-0.71790 0.20479-0.58177 0.19360-0.40098
   4   2  -4 1492.60   40.46  17 0.96417-0.88758 0.20485-0.07914 0.19376-0.47689
   4   8   8   24.95   12.31  17 0.96417-0.86567 0.20485 0.29808 0.19376 0.37939
   4   6   9   83.99   13.35  17 0.96413-0.86383 0.20491 0.17228 0.19392 0.45064
  -1   5   5   42.84    7.91  17 0.96413-0.97607 0.20491 0.10938 0.19392 0.16233
  14  10  -6   -5.07    7.53  17 0.96400-0.68138 0.20509 0.42335 0.19440-0.61470
  17  -7  -4   72.89   11.71  17 0.96400-0.61461 0.20509-0.64482 0.19440-0.47030
  15   5  -8   44.19   11.08  17 0.96396-0.66399 0.20514 0.10907 0.19456-0.75687
  25  -9  -4   17.23   16.35  17 0.96396-0.44680 0.20514-0.77056 0.19456-0.46608
  14  -2  12   28.48   18.28  17 0.96372-0.64789 0.20549-0.33135 0.19551 0.66869
  29  -7  -7  -14.95   34.99  17 0.96368-0.36817 0.20555-0.64520 0.19566-0.67886
   4  10   6  330.72   17.98  17 0.96364-0.86879 0.20561 0.42303 0.19582 0.23455
   3   7   8   74.34   13.36  17 0.96360-0.88607 0.20567 0.23438 0.19598 0.37661
  18  -8  -3  196.21   13.54  17 0.96344-0.59123 0.20590-0.70850 0.19661-0.40066
  19   3  -9  -46.73   17.10  17 0.96331-0.58127 0.20608-0.01752 0.19709-0.82846
  13   7  -7   11.07    7.98  17 0.96327-0.70344 0.20613 0.23377 0.19725-0.68939
  18   8  -8  176.97   15.85  17 0.96319-0.60032 0.20625 0.29647 0.19756-0.75824
  16  -8  -2   41.19    8.90  17 0.96319-0.63109 0.20625-0.70888 0.19756-0.33139
   8  -4  -3   71.33    8.36  17 0.96315-0.80076 0.20631-0.45762 0.19772-0.40730
   4  -4   5  112.33    6.64  17 0.96294-0.86981 0.20660-0.45807 0.19851 0.16046
   7  -5  -1 2661.40   69.17  17 0.96290-0.81780 0.20666-0.52084 0.19867-0.26614
   0   6   6   46.82    9.77  17 0.96286-0.95197 0.20672 0.17045 0.19883 0.22935
   5  -1   9    7.11   10.95  17 0.96282-0.84142 0.20677-0.26972 0.19899 0.44607
   7  -1  10   33.00   12.92  17 0.96282-0.79756 0.20677-0.26972 0.19899 0.51853
   6  12   4   -1.72   10.18  17 0.96266-0.82953 0.20701 0.54735 0.19962 0.08910
  13  -7  -2   22.30    8.07  17 0.96261-0.69347 0.20706-0.64689 0.19978-0.33527
  21  -3  -8  -21.60   18.63  17 0.96249-0.53660 0.20724-0.39560 0.20025-0.75915
   9   1  -6   81.10    9.38  17 0.96249-0.78465 0.20724-0.14435 0.20025-0.62323
   6   4  -5  253.18   10.40  17 0.96249-0.84581 0.20724 0.04416 0.20025-0.55361
  10  -4  -4 3656.81   96.59  17 0.96241-0.75991 0.20735-0.45865 0.20057-0.48036
   6  -2   9   47.47   11.60  17 0.96216-0.81971 0.20770-0.33350 0.20152 0.44406
  16  -6  10   -8.48   12.85  17 0.96211-0.60792 0.20776-0.58501 0.20167 0.52074
  11  -5   9   -7.55    9.75  17 0.96207-0.71467 0.20782-0.52221 0.20183 0.44647
   5  -3  -2 1957.46   51.75  17 0.96207-0.86079 0.20782-0.39632 0.20183-0.34174
   5  11   0  300.90   10.67  17 0.96203-0.85726 0.20788 0.48355 0.20199-0.19927
   6   0  10   -1.29   11.97  17 0.96203-0.81781 0.20788-0.20796 0.20199 0.51501
  14  -8   6   17.66    4.33  17 0.96195-0.65709 0.20799-0.71087 0.20231 0.23350
  14  -4  11   34.74   15.23  17 0.96191-0.64788 0.20805-0.45962 0.20247 0.59028
  -2   4   3  374.11   14.15  17 0.96186-0.99840 0.20811 0.04330 0.20262 0.01033
   8  -2  10   27.18   13.18  17 0.96178-0.77557 0.20822-0.33406 0.20294 0.51515
   2  -2   6  620.83   20.58  17 0.96174-0.90878 0.20828-0.33406 0.20310 0.22615
   4   4  -4  192.62    7.89  17 0.96174-0.88519 0.20828 0.04312 0.20310-0.48624
   4   0   9   53.47   12.36  17 0.96161-0.86115 0.20846-0.20852 0.20357 0.44091
   1  -1   6 2744.50   73.66  17 0.96157-0.92959 0.20851-0.27143 0.20373 0.22497
  15  -7  -3  154.73   11.92  17 0.96153-0.65227 0.20857-0.64836 0.20389-0.40959
  -1   1   5   60.68    8.72  17 0.96140-0.97326 0.20875-0.14593 0.20436 0.15187
  15   3  -8   18.56   11.90  17 0.96136-0.66139 0.20880-0.02025 0.20452-0.76683
   2   6   8  100.35   13.44  17 0.96132-0.90479 0.20886 0.16831 0.20468 0.36737
  12  -2  -6  172.14   13.19  17 0.96127-0.72047 0.20892-0.33451 0.20484-0.62612
  17  -3  -7   76.23   14.74  17 0.96123-0.61741 0.20898-0.39737 0.20499-0.69483
  17   7  -8   10.92   11.97  17 0.96119-0.61930 0.20904 0.23086 0.20515-0.76640
  11  -7   6   -5.45    4.42  17 0.96110-0.71920 0.20915-0.64918 0.20547 0.22870
   9  -5   8  144.18   10.60  17 0.96102-0.75743 0.20927-0.52364 0.20578 0.37004
  24  -4  -8   -1.31   21.95  17 0.96085-0.47207 0.20950-0.46070 0.20641-0.76370
   0   8   3 1446.80   41.17  17 0.96085-0.95544 0.20950 0.29337 0.20641 0.00764
   3   5   9   22.91   12.75  17 0.96081-0.88140 0.20956 0.10474 0.20657 0.43739
   2   0  -2  982.33   26.73  17 0.96076-0.92245 0.20961-0.20959 0.20673-0.34830
   1   9   3 2156.43   59.47  17 0.96042-0.93409 0.21008 0.35568 0.20799 0.00661
   0   4   7   19.35   10.09  17 0.96042-0.94770 0.21008 0.04134 0.20799 0.29156
  17  -9   0   56.10    7.65  17 0.96016-0.60341 0.21042-0.77595 0.20894-0.19957
  30  -8  -6   93.75   33.02  17 0.95999-0.34164 0.21065-0.71312 0.20957-0.62090
  20   2  -9   18.90   18.62  17 0.95995-0.55691 0.21071-0.08497 0.20973-0.84051
  -2   4   2 2376.74   62.30  17 0.95990-0.99828 0.21077 0.04064 0.20989-0.06830
  -1   3   6  104.16   10.77  17 0.95977-0.96984 0.21094-0.02240 0.21036 0.21725
   5   1  10   84.73   14.77  17 0.95964-0.83639 0.21111-0.14832 0.21083 0.50561
  10   0  -6   63.26   10.07  17 0.95960-0.76079 0.21117-0.21111 0.21099-0.63341
  -2   4   4  311.64   13.34  17 0.95956-0.99425 0.21123 0.04018 0.21115 0.07317
  25  -7  -6   61.32   19.80  17 0.95943-0.44593 0.21140-0.65105 0.21162-0.62569
   6  12   1    4.64    5.83  17 0.95943-0.83184 0.21140 0.54291 0.21162-0.13700
  -2   2   3  310.94   11.91  17 0.95943-0.99594 0.21140-0.08572 0.21162 0.00133
  11  -1  -6  276.61   14.72  17 0.95934-0.73956 0.21152-0.27429 0.21194-0.63381
   3  -1   8   60.70   10.67  17 0.95934-0.88169 0.21152-0.27444 0.21194 0.36060
   5  11   6   69.52   13.28  17 0.95930-0.84353 0.21158 0.47998 0.21209 0.21884
  13  -5  10   18.25   11.49  17 0.95930-0.66806 0.21158-0.52597 0.21209 0.50868
   0   8   2  271.97   11.21  17 0.95916-0.95563 0.21175 0.29112 0.21257-0.06988
  11  -3  -5  183.76   12.66  17 0.95916-0.73751 0.21175-0.40018 0.21257-0.56311
   2   8   7    2.64   11.00  17 0.95912-0.90447 0.21181 0.29112 0.21273 0.28794
   7  -3   9   18.67   10.39  17 0.95912-0.79570 0.21181-0.40048 0.21273 0.43340
   0   2   7   23.40    9.53  17 0.95908-0.94632 0.21186-0.08619 0.21288 0.28666
   1   3   8  115.27   12.82  17 0.95908-0.92350 0.21186-0.02332 0.21288 0.35860
  15  -5  -5   87.41   12.76  17 0.95908-0.65353 0.21186-0.52596 0.21288-0.56123
   9   5  -6    5.08    7.00  17 0.95908-0.78132 0.21186 0.10237 0.21288-0.63592
   0   8   4  265.63   13.34  17 0.95899-0.95180 0.21198 0.29091 0.21320 0.07222
  21  -7  -5   99.90   15.99  17 0.95890-0.52747 0.21209-0.65181 0.21351-0.55852
   1   9   2  150.90    9.17  17 0.95881-0.93429 0.21221 0.35352 0.21383-0.07059
   4  -2   8   15.02    9.39  17 0.95881-0.86018 0.21221-0.33800 0.21383 0.35926
   1   9   4   30.56    8.64  17 0.95873-0.93050 0.21232 0.35342 0.21414 0.07182
   9  -3  10   65.31   13.15  17 0.95864-0.75137 0.21244-0.40111 0.21446 0.50413
  18  10  -7   -5.69   11.03  17 0.95864-0.59397 0.21244 0.41599 0.21446-0.70390
   6  12   5   45.62   12.12  17 0.95859-0.82366 0.21250 0.54190 0.21462 0.14548
   0   0   6 8344.61  214.11  17 0.95859-0.94762 0.21250-0.21255 0.21462 0.21353
   3   1   9  123.23   15.19  17 0.95855-0.87917 0.21255-0.14977 0.21477 0.42920
  23  -9  -3   22.78   13.17  17 0.95855-0.48148 0.21255-0.77799 0.21477-0.41607
  12   2  -7  102.18   11.45  17 0.95850-0.71958 0.21261-0.08688 0.21493-0.70755
   3   9   7   28.40   12.14  17 0.95850-0.88287 0.21261 0.35320 0.21493 0.28629
   3  -3   6  139.13    8.91  17 0.95846-0.88450 0.21267-0.40131 0.21509 0.21470
  21   1  -9   34.67   19.65  17 0.95842-0.53444 0.21273-0.14982 0.21525-0.84553
  20  -2  -8   -2.53   15.38  17 0.95828-0.55343 0.21290-0.33848 0.21572-0.77525
  16  -4  -6   -8.29   33.47  17 0.95815-0.63349 0.21307-0.46433 0.21619-0.63531
  -1   7   3  390.22   14.81  17 0.95806-0.97368 0.21319 0.22683 0.21651-0.00301
   1   7   7  108.24   12.09  17 0.95793-0.92419 0.21336 0.22667 0.21698 0.28311
   2   0   8  302.82   15.66  17 0.95757-0.90097 0.21382-0.21389 0.21824 0.35378
  20  -4  -7   22.05   13.10  17 0.95735-0.55061 0.21410-0.46532 0.21903-0.70721
   2  10   3  750.97   24.48  17 0.95726-0.90989 0.21422 0.41438 0.21934-0.00419
  -2   2   4  113.48    7.73  17 0.95721-0.99192 0.21428-0.08859 0.21950 0.06482
  -1   5   6   32.22    6.90  17 0.95717-0.96724 0.21433 0.09995 0.21966 0.20796
  18  -6  -5  155.12   12.61  17 0.95712-0.58862 0.21439-0.59129 0.21981-0.56648
   1   5   8   31.88    8.30  17 0.95699-0.92146 0.21456 0.09973 0.22028 0.35121
  23  -5  -7    7.15   12.49  17 0.95676-0.48707 0.21485-0.52885 0.22107-0.70755
  12   4  -7  379.05   16.02  17 0.95676-0.71789 0.21485 0.03655 0.22107-0.71375
   3   1  -318317.40  460.18  17 0.95676-0.89932 0.21485-0.15198 0.22107-0.43342
   7  11   8   13.95   13.96  17 0.95671-0.79530 0.21490 0.47668 0.22123 0.35358
  16   2  -8  104.55   11.32  17 0.95667-0.63572 0.21496-0.08923 0.22139-0.78313
  -1   7   4  170.99    9.38  18 0.95658-0.97034 0.21508 0.22494 0.22170 0.06317
   7   1  -5  939.25   27.79  18 0.95649-0.81878 0.21519-0.15230 0.22201-0.57478
  22  -8  -4  225.87   14.46  18 0.95644-0.50216 0.21525-0.71778 0.22217-0.49530
  27  -9  -4   -2.68   14.58  18 0.95640-0.39725 0.21531-0.78065 0.22233-0.49270
   4  10   7   -6.11    9.90  18 0.95612-0.85950 0.21565 0.41304 0.22327 0.27849
  26  -8  -5   29.18   15.58  18 0.95608-0.41979 0.21571-0.71825 0.22343-0.56569
  -2   2   2  330.46   10.97  18 0.95603-0.99436 0.21576-0.09007 0.22359-0.08199
   4  -2  -2  960.55   26.47  18 0.95598-0.87569 0.21582-0.34148 0.22374-0.36420
   2  10   4   14.82    7.73  18 0.95594-0.90674 0.21588 0.41274 0.22390 0.06261
   6   4  11  292.98   19.87  18 0.95585-0.80982 0.21599 0.03543 0.22422 0.56420
  22  -6  -6  174.85   16.38  18 0.95585-0.50532 0.21599-0.59289 0.22422-0.64001
   5  -5   4  244.55    8.20  18 0.95566-0.84336 0.21622-0.53052 0.22484 0.06331
  20 -10   2   32.38    6.32  18 0.95566-0.53227 0.21622-0.84463 0.22484-0.07115
   9   3  -6   25.08    7.66  18 0.95562-0.77783 0.21628-0.02772 0.22500-0.64801
   4   2  10   50.57   12.86  18 0.95562-0.85335 0.21628-0.09061 0.22500 0.49088
  -1   7   2  146.48    7.75  18 0.95557-0.97297 0.21633 0.22366 0.22516-0.08302
   5  -3   8  296.05   14.90  18 0.95552-0.83593 0.21639-0.40506 0.22532 0.34833
  10   0  12  -22.71   18.33  18 0.95539-0.72355 0.21656-0.21667 0.22579 0.63622
   2   4   9    3.60   11.58  18 0.95529-0.89687 0.21668 0.03474 0.22610 0.41730
  19  -1  -8  351.55   21.09  18 0.95525-0.57137 0.21673-0.27948 0.22626-0.78633
  11  -1  12    4.22   17.87  18 0.95515-0.70230 0.21685-0.27983 0.22657 0.63597
  19  -5  -6  108.28   15.16  18 0.95515-0.56752 0.21685-0.53089 0.22657-0.64398
  11  -3  11   -5.90   13.71  18 0.95511-0.70402 0.21690-0.40559 0.22673 0.56434
   9  -3  -4  658.89   22.14  18 0.95506-0.77352 0.21696-0.40541 0.22689-0.50722
  16   4  -8   48.35   12.40  18 0.95501-0.63410 0.21702 0.03438 0.22704-0.78882
   2  10   2  393.17   14.72  18 0.95497-0.90945 0.21707 0.41151 0.22720-0.08342
   0   8   5   82.51   10.12  18 0.95488-0.94585 0.21719 0.28571 0.22751 0.12928
  21  -9  -2   95.70   12.20  18 0.95483-0.51785 0.21725-0.78269 0.22767-0.35874
   7  -3  -3 1112.96   32.13  18 0.95478-0.81339 0.21730-0.40579 0.22783-0.43796
   1   9   5   -1.93    8.50  18 0.95474-0.92468 0.21736 0.34840 0.22799 0.12935
  -2   4   5  178.02   11.26  18 0.95469-0.98757 0.21742 0.03400 0.22814 0.12754
  23  -3  -8   40.70   19.93  18 0.95469-0.48688 0.21742-0.40579 0.22814-0.78596
  13   1  -7  258.02   15.52  18 0.95464-0.69476 0.21747-0.15457 0.22830-0.72038
  13   9  -6   23.23    6.70  18 0.95460-0.69296 0.21753 0.34807 0.22846-0.64931
   3  -1  -2 1947.73   50.94  18 0.95460-0.89531 0.21753-0.28035 0.22846-0.36947
   0   6   7   48.02   11.30  18 0.95455-0.94186 0.21759 0.15958 0.22861 0.27094
  22 -10   0   40.89    9.53  18 0.95455-0.49289 0.21759-0.84592 0.22861-0.21649
  10  -2  -5  170.61   11.85  18 0.95455-0.75392 0.21759-0.34321 0.22861-0.57974
  19  -9  -1  145.93   11.33  18 0.95446-0.55757 0.21770-0.78316 0.22893-0.28977
  26  -4  -8   16.84   23.83  18 0.95427-0.42356 0.21793-0.46914 0.22955-0.78575
  15  -1  -7  166.93   14.64  18 0.95417-0.65233 0.21804-0.28080 0.22987-0.72083
  17   1  -8  437.43   22.10  18 0.95417-0.61225 0.21804-0.15514 0.22987-0.79106
  18   0  -8  760.63   30.34  18 0.95375-0.59081 0.21855-0.21846 0.23128-0.79187
   1   1   8  315.70   16.99  18 0.95375-0.91815 0.21855-0.15576 0.23128 0.34018
   2   2   9   86.29   13.76  18 0.95375-0.89529 0.21855-0.09288 0.23128 0.41211
   7  -5   7   19.49    7.09  18 0.95366-0.79388 0.21867-0.53303 0.23159 0.27175
  13  -5  -4  494.87   19.37  18 0.95347-0.68801 0.21889-0.53300 0.23222-0.51034
  15  -5  11   29.67   15.76  18 0.95337-0.61835 0.21901-0.53345 0.23253 0.56075
  14   0  -7   -1.24   11.35  18 0.95328-0.67242 0.21912-0.21905 0.23285-0.72437
  24 -10  -1   52.00   12.32  18 0.95323-0.45145 0.21918-0.84744 0.23301-0.29109
   5   1  -4 2274.75   60.38  18 0.95323-0.85567 0.21918-0.15630 0.23301-0.51558
   1   3  -2 3026.27   76.53  18 0.95313-0.93584 0.21929-0.03074 0.23332-0.37545
  12  -2  12  -35.17   17.75  18 0.95313-0.67923 0.21929-0.34513 0.23332 0.62971
  -1   1   6 4854.37  127.13  18 0.95299-0.96304 0.21946-0.15666 0.23379 0.19382
  28  -6  -7   29.82   25.15  18 0.95294-0.37839 0.21952-0.59631 0.23395-0.71764
   8  -4   9   18.07   10.23  18 0.95294-0.76852 0.21952-0.47106 0.23395 0.41272
   6  12   6  -56.80   15.60  18 0.95290-0.81613 0.21957 0.53484 0.23410 0.19737
  11  -7   0  276.65   10.28  18 0.95285-0.72197 0.21963-0.65949 0.23426-0.22819
  14  -8   0   65.84    6.67  18 0.95280-0.65899 0.21969-0.72239 0.23442-0.22669
  10  -4  10   13.58   11.56  18 0.95256-0.72430 0.21997-0.47151 0.23520 0.48393
  27  -7  -6   21.39   21.40  18 0.95256-0.39716 0.21997-0.65967 0.23520-0.64822
  -1   7   5    7.13    8.17  18 0.95256-0.96445 0.21997 0.22004 0.23520 0.12103
   8   0  -5  362.73   15.02  18 0.95251-0.79382 0.22003-0.21997 0.23536-0.58757
   2  10   5  151.80   12.20  18 0.95222-0.90123 0.22037 0.40828 0.23630 0.12159
   9  -1  -5  124.00   10.47  18 0.95208-0.77242 0.22054-0.28332 0.23677-0.58844
  -2   2   5  571.35   19.77  18 0.95208-0.98491 0.22054-0.09486 0.23677 0.11891
   5  11   7   47.70   15.45  18 0.95189-0.83430 0.22076 0.47081 0.23739 0.26492
   9  -5  -2  552.57   18.44  18 0.95189-0.76665 0.22076-0.53491 0.23739-0.37507
  19  -7  -4   58.86   12.29  18 0.95140-0.56009 0.22133-0.66108 0.23896-0.51376
  -2   6   3  775.73   23.86  18 0.95125-0.98781 0.22150 0.15564 0.23943-0.02648
  15  -3  -6  258.40   15.95  18 0.95125-0.64757 0.22150-0.40992 0.23943-0.65908
  -1   5   0  469.43   13.24  18 0.95121-0.97225 0.22155 0.09271 0.23958-0.24015
   3  11   3  110.61    9.58  18 0.95111-0.88277 0.22167 0.46980 0.23990-0.02421
   8  -6   6   25.22    5.23  18 0.95096-0.77203 0.22184-0.59903 0.24037 0.19215
  -2   6   4   24.84    7.22  18 0.95077-0.98548 0.22206 0.15508 0.24099 0.04332
  19  -3  -7   47.62   14.80  18 0.95057-0.56480 0.22229-0.41067 0.24162-0.73033
   3  11   4  112.45   11.24  18 0.95057-0.88042 0.22229 0.46921 0.24162 0.04544
   1   9   1   44.47    5.71  18 0.95052-0.92783 0.22234 0.34337 0.24177-0.16990
  -1   3   7  142.34   12.22  18 0.95052-0.95870 0.22234-0.03380 0.24177 0.25720
   0   8   1  610.08   18.49  18 0.95047-0.94873 0.22240 0.28044 0.24193-0.17060
   2   6   9   35.17   14.25  18 0.95037-0.89203 0.22251 0.15467 0.24224 0.40119
  11  -5  -3  504.59   17.98  18 0.95027-0.72496 0.22262-0.53677 0.24255-0.45047
  17   5  -8   47.88   12.76  18 0.95018-0.60828 0.22274 0.09149 0.24287-0.80409
  20  -8  -3   99.30   13.00  18 0.95018-0.53603 0.22274-0.72534 0.24287-0.44580
  17   9  -7    1.50    9.89  18 0.95008-0.60638 0.22285 0.34274 0.24318-0.73315
   0   4   8   83.34   12.85  18 0.95008-0.93544 0.22285 0.02856 0.24318 0.32772
   1  -1   7   -4.31    8.27  18 0.95003-0.91621 0.22291-0.28583 0.24334 0.25673
   4  -4   6   37.82    6.45  18 0.95003-0.85504 0.22291-0.47439 0.24334 0.18699
  16  -6  -4  125.23   12.71  18 0.95003-0.62166 0.22291-0.59985 0.24334-0.51981
  13   5  -7   89.58   10.88  18 0.94993-0.69009 0.22302 0.09121 0.24365-0.73577
   2   8   8  -18.00   12.27  18 0.94988-0.89330 0.22307 0.27983 0.24380 0.32821
   3   3  10    7.87   14.04  18 0.94983-0.86860 0.22313-0.03459 0.24396 0.47139
  12   8  -6   36.91    7.01  18 0.94968-0.70900 0.22330 0.27945 0.24443-0.66581
  14  -4  -5  168.75   13.45  18 0.94953-0.66497 0.22347-0.47474 0.24490-0.59379
   7   5  -5   -2.15    5.04  18 0.94948-0.81183 0.22352 0.09071 0.24505-0.59786
   8  -2  -4  722.86   23.45  18 0.94943-0.78891 0.22358-0.34921 0.24521-0.52611
   3   9   8  -36.15   13.70  18 0.94943-0.87188 0.22358 0.34221 0.24521 0.32736
  22  -2  -8   38.82   18.02  18 0.94938-0.50257 0.22364-0.34920 0.24537-0.80376
   2  -2   7  139.31   10.56  18 0.94938-0.89454 0.22364-0.34941 0.24537 0.25523
  15  -7   9   19.54    9.02  18 0.94933-0.61797 0.22369-0.66380 0.24552 0.40496
  23  -7  -5   29.12   15.33  18 0.94928-0.47592 0.22375-0.66347 0.24568-0.58959
  11   7  -6   32.14    6.96  18 0.94923-0.72954 0.22381 0.21611 0.24584-0.66778
  25  -5  -7   87.89   21.92  18 0.94908-0.43749 0.22397-0.53801 0.24630-0.73173
  28  -8  -5   49.52   19.80  18 0.94893-0.37069 0.22414-0.72666 0.24677-0.58791
   0   8   6  563.05   22.88  18 0.94893-0.93801 0.22414 0.27875 0.24677 0.18138
   1   9   6  222.28   16.85  18 0.94888-0.91703 0.22420 0.34158 0.24693 0.18178
  13  -7   8   29.73    7.87  18 0.94883-0.66129 0.22425-0.66434 0.24708 0.33092
  12  -4  11   20.80   14.65  18 0.94863-0.67656 0.22448-0.47605 0.24771 0.54392
  -1   5   7   18.51   10.21  18 0.94863-0.95684 0.22448 0.08980 0.24771 0.25127
   6  -4   8  415.76   17.24  18 0.94848-0.80787 0.22465-0.47618 0.24818 0.32600
  12  -6   9   44.73    9.58  18 0.94848-0.68007 0.22465-0.60189 0.24818 0.40065
  25  -9  -3  152.05   16.49  18 0.94843-0.42940 0.22470-0.79011 0.24833-0.44851
   1   7   8  109.76   13.56  18 0.94838-0.91282 0.22476 0.21528 0.24849 0.32299
   6  -2  -3 2055.35   54.88  18 0.94828-0.82785 0.22487-0.35051 0.24880-0.45947
  17   3  -8   90.32   13.62  18 0.94828-0.60635 0.22487-0.03631 0.24880-0.80997
  22  -4  -7   72.48   16.11  18 0.94808-0.49941 0.22510-0.47632 0.24943-0.73651
  -2   4   6  148.99   10.88  18 0.94787-0.97889 0.22532 0.02609 0.25005 0.17700
   0   2   8   72.53   10.86  18 0.94782-0.93320 0.22538-0.09971 0.25021 0.32070
   0   0   7    9.72    7.78  18 0.94777-0.93500 0.22543-0.22550 0.25036 0.24917
  13   3  -7   97.00   10.93  18 0.94772-0.68789 0.22549-0.03693 0.25052-0.74264
   4   0  -3   41.30    4.97  18 0.94762-0.86919 0.22560-0.22557 0.25083-0.46262
   5  -1  10   44.49   11.82  18 0.94757-0.82426 0.22566-0.28860 0.25098 0.46541
   3  11   2   51.43    7.81  18 0.94747-0.88096 0.22577 0.46568 0.25130-0.10697
   6   0  -4  129.32    7.72  18 0.94747-0.82892 0.22577-0.22573 0.25130-0.53331
   3  11   5   37.15    9.26  18 0.94737-0.87540 0.22588 0.46565 0.25161 0.10683
  -2   4   1 8203.07  206.99  18 0.94726-0.98745 0.22599 0.02542 0.25192-0.18169
  -2   6   5  153.97    9.62  18 0.94716-0.98005 0.22610 0.15104 0.25223 0.10345
   4  10   8   20.52   11.59  18 0.94711-0.84867 0.22616 0.40255 0.25239 0.32076
  24  -6  -6  796.29   29.89  18 0.94706-0.45456 0.22621-0.60306 0.25254-0.66718
  19   7  -8   22.24   12.97  18 0.94706-0.56322 0.22621 0.21368 0.25254-0.81267
  10   2  -6  407.79   15.47  18 0.94701-0.74823 0.22627-0.10054 0.25270-0.67514
   1   3   9   24.30    9.27  18 0.94696-0.90952 0.22633-0.03779 0.25286 0.38999
   4   0  10   -3.44    8.79  19 0.94691-0.84461 0.22638-0.22646 0.25301 0.46285
  12  10  -5   45.55    5.84  19 0.94685-0.70436 0.22644 0.40203 0.25317-0.60326
  10  -6  -1  309.78   11.63  19 0.94675-0.73870 0.22655-0.60356 0.25348-0.31929
   7   3  12   -1.13   14.25  19 0.94670-0.77784 0.22660-0.03807 0.25363 0.60673
   2  10   6  408.51   18.82  19 0.94665-0.89378 0.22666 0.40198 0.25379 0.17546
   7  -1  11    9.57   10.19  19 0.94655-0.77947 0.22677-0.28974 0.25410 0.53481
  -1   7   6  202.18   11.93  19 0.94655-0.95660 0.22677 0.21325 0.25410 0.17350
   7  -1  -4  228.90   10.35  19 0.94649-0.80694 0.22683-0.28962 0.25426-0.53570
  -2   6   2  279.01   10.62  19 0.94639-0.98480 0.22694 0.15019 0.25457-0.11299
  24  -8  -4   10.97   12.03  19 0.94639-0.45018 0.22694-0.72947 0.25457-0.52659
   6   0  11   -9.35   10.60  19 0.94639-0.80031 0.22694-0.22704 0.25457 0.53380
  29  -7  -6   48.20   20.49  19 0.94608-0.34872 0.22727-0.66693 0.25550-0.66738
   7   3  -5  982.27   28.73  19 0.94608-0.80842 0.22727-0.03871 0.25550-0.60830
   6  -2  10   29.01   11.73  19 0.94598-0.80167 0.22739-0.35320 0.25581 0.46112
  18  -8  -2  198.58   12.36  19 0.94587-0.57185 0.22750-0.73014 0.25613-0.38885
  18  -4  -6  210.66   15.91  19 0.94567-0.57903 0.22772-0.47895 0.25675-0.67472
   2  10   1  166.92    8.44  19 0.94561-0.90192 0.22778 0.40079 0.25690-0.18448
  14  -2  -6  134.72   12.67  19 0.94556-0.66283 0.22783-0.35341 0.25706-0.67724
   1   5   9   49.37   12.03  19 0.94556-0.90812 0.22783 0.08646 0.25706 0.38578
  16  -8  -1   65.14    8.20  19 0.94551-0.61157 0.22789-0.73054 0.25722-0.31971
  10  -6   8   17.83    7.60  19 0.94541-0.72082 0.22800-0.60523 0.25753 0.31883
   5  -1  -3   19.75    6.20  19 0.94530-0.84587 0.22811-0.29091 0.25784-0.46906
  21  -1  -8  150.66   17.42  19 0.94530-0.51947 0.22811-0.29085 0.25784-0.81679
  14   6  -7   10.62    9.05  19 0.94530-0.66451 0.22811 0.14896 0.25784-0.74943
  20  -6  -5    0.08   12.69  19 0.94525-0.53483 0.22817-0.60508 0.25799-0.60357
   5  -5   5  454.84   14.24  19 0.94504-0.83091 0.22839-0.54271 0.25862 0.10089
  17  -5  -5   -1.35   11.24  19 0.94499-0.59746 0.22844-0.54251 0.25877-0.60597
  16   8  -7   14.65    9.84  19 0.94499-0.62223 0.22844 0.27429 0.25877-0.74924
  17  -7  -3   15.57   10.18  19 0.94488-0.59365 0.22855-0.66831 0.25908-0.46365
   3  -1   9  145.39   14.99  19 0.94483-0.86541 0.22861-0.29157 0.25924 0.38470
  18  -2  -7   32.18   13.59  19 0.94483-0.58004 0.22861-0.35417 0.25924-0.74850
  -2   2   6  727.15   24.81  19 0.94473-0.97575 0.22872-0.10305 0.25955 0.16750
   0   6   8   96.27   13.29  19 0.94473-0.93015 0.22872 0.14844 0.25955 0.31137
  21  -5  -6   82.14   16.45  19 0.94446-0.51488 0.22900-0.54302 0.26033-0.67660
  17  -7  10   36.31   12.20  19 0.94446-0.56928 0.22900-0.66913 0.26033 0.46263
  14  -6  -3  448.79   17.67  19 0.94441-0.65614 0.22905-0.60601 0.26048-0.46673
  -1   7   1  357.09   11.81  19 0.94425-0.96351 0.22922 0.21077 0.26095-0.19018
   3   1  10   66.95   13.97  19 0.94425-0.86294 0.22922-0.16643 0.26095 0.45436
  18   2  -8  117.67   15.03  19 0.94410-0.58121 0.22939-0.10365 0.26141-0.82206
  16  -8   8   36.16    7.91  19 0.94404-0.59352 0.22944-0.73237 0.26157 0.31807
   2   0   9  396.59   20.14  19 0.94378-0.88528 0.22972-0.22979 0.26235 0.38101
  15   7  -7   -1.85    8.94  19 0.94351-0.64175 0.23000 0.20991 0.26312-0.75417
   4  -2   9  135.68   13.54  19 0.94346-0.84299 0.23005-0.35586 0.26328 0.38118
   6  12   0   33.25    5.22  19 0.94314-0.81738 0.23038 0.52390 0.26421-0.26095
  10   4  -6   -2.37    7.15  19 0.94314-0.74439 0.23038 0.02101 0.26421-0.68667
  -1   1   7  396.98   17.48  19 0.94293-0.95115 0.23061-0.16781 0.26483 0.23415
  20   0  -8  616.28   27.06  19 0.94282-0.53795 0.23072-0.23062 0.26514-0.82462
   6  -4  -1  437.49   13.75  19 0.94277-0.81867 0.23077-0.48212 0.26530-0.33332
  18  -8   9   26.23    9.83  19 0.94271-0.54836 0.23083-0.73375 0.26545 0.38664
  -3   3   4  561.86   19.22  19 0.94244-0.99814 0.23110-0.04256 0.26623 0.01753
  30  -8  -5  -17.12   23.37  19 0.94234-0.32213 0.23121-0.73367 0.26654-0.60652
  19   1  -8  335.64   20.26  19 0.94234-0.55847 0.23121-0.16830 0.26654-0.82661
   4  12   4   15.35    9.95  19 0.94228-0.85117 0.23127 0.52311 0.26669 0.02091
  11  -5  10    4.98   10.79  19 0.94223-0.69298 0.23132-0.54574 0.26685 0.45282
  12  -6  -2  246.20   11.40  19 0.94218-0.69402 0.23138-0.60837 0.26700-0.40303
   3  11   6  -12.03   12.12  19 0.94212-0.86829 0.23143 0.46009 0.26716 0.16265
   9  -5   9   35.93   10.07  19 0.94207-0.73661 0.23149-0.54587 0.26731 0.37986
  11   1  -6  245.94   13.68  19 0.94196-0.72219 0.23160-0.16870 0.26762-0.68949
  13  -7  -1  191.89    9.93  19 0.94185-0.67085 0.23171-0.67154 0.26793-0.33208
  27  -5  -7  231.01   25.42  19 0.94174-0.38817 0.23182-0.54580 0.26824-0.75249
  13  -1  -6   99.45   12.03  19 0.94174-0.68001 0.23182-0.29458 0.26824-0.68899
  14   2  -7   87.88   11.37  19 0.94164-0.66078 0.23193-0.10620 0.26855-0.76007
   7  -3  10   30.55   12.06  19 0.94164-0.77635 0.23193-0.42062 0.26855 0.44893
   4  12   3   12.60    8.56  19 0.94153-0.85222 0.23204 0.52230 0.26886-0.05263
  12  -4  -4  196.01   12.68  19 0.94147-0.69702 0.23210-0.48338 0.26902-0.54769
  23  -9  -2    0.44   12.07  19 0.94136-0.46242 0.23221-0.79760 0.26933-0.39927
   1   9   7   16.08   11.54  19 0.94136-0.90769 0.23221 0.33359 0.26933 0.23076
  -2   6   6  132.02   11.45  19 0.94131-0.97236 0.23226 0.14489 0.26948 0.15756
   0   8   7   99.80   13.37  19 0.94126-0.92851 0.23232 0.27058 0.26964 0.22989
  18   4  -8   36.61   12.98  19 0.94120-0.57833 0.23237 0.01902 0.26979-0.83044
   5   5  -4  263.36    9.31  19 0.94115-0.84364 0.23243 0.08182 0.26995-0.55255
  -3   3   3  611.29   19.34  19 0.94104-0.99853 0.23254-0.04399 0.27026-0.05787
  15  -7  -2  702.60   23.38  19 0.94087-0.62977 0.23270-0.67251 0.27072-0.40509
  -1  -1   4 1252.30   34.66  19 0.94087-0.95451 0.23270-0.29559 0.27072 0.01413
  22 -10   1  118.07   13.19  19 0.94082-0.47732 0.23276-0.86113 0.27088-0.18742
  24  -2  -8   83.40   20.19  19 0.94071-0.45194 0.23287-0.35841 0.27119-0.82843
  17  -1  -7   56.35   13.34  19 0.94060-0.59678 0.23298-0.29571 0.27150-0.76130
  13  -3  -5   57.26   10.30  19 0.94060-0.67700 0.23298-0.42140 0.27150-0.62092
   1   1   9  987.86   34.69  19 0.94038-0.90296 0.23320-0.17042 0.27212 0.37073
  12   0  -6 1041.18   32.65  19 0.94038-0.69966 0.23320-0.23314 0.27212-0.69345
  -3   5   4   92.53    8.78  19 0.94033-0.99600 0.23325 0.08102 0.27227 0.01148
  31  -7  -6   82.32   30.29  19 0.94022-0.30091 0.23336-0.67299 0.27258-0.68332
   9  -3  11   14.47   14.18  19 0.94000-0.73092 0.23358-0.42230 0.27320 0.51679
   4  12   5  109.81   13.19  19 0.93989-0.84693 0.23369 0.52070 0.27351 0.08546
  21  -3  -7   20.43   15.03  19 0.93989-0.51220 0.23369-0.42209 0.27351-0.76114
   0  -2   4 1587.37   42.66  19 0.93978-0.93243 0.23380-0.35955 0.27382 0.01158
   2   2  10   19.88   13.90  19 0.93961-0.87936 0.23397-0.10831 0.27428 0.44050
  -1   3   8  140.36   14.09  19 0.93961-0.94601 0.23397-0.04543 0.27428 0.29608
  -3   3   5  313.72   14.40  19 0.93945-0.99328 0.23413-0.04559 0.27475 0.08037
   2  10   7   25.37   12.26  19 0.93934-0.88461 0.23424 0.39440 0.27506 0.22557
   3   5  -3   42.52    3.26  19 0.93934-0.88195 0.23424 0.08001 0.27506-0.48743
  -2   4   7   34.80   10.09  19 0.93923-0.96848 0.23435 0.01706 0.27537 0.22307
  11  -7   7   69.31    6.78  19 0.93906-0.69531 0.23452-0.67457 0.27583 0.22969
  24  -4  -7   19.75   17.40  19 0.93906-0.44844 0.23452-0.48573 0.27583-0.76179
   5  -3   9   19.83   10.57  19 0.93900-0.81752 0.23457-0.42324 0.27599 0.36901
  27  -9  -3  -12.89   16.58  19 0.93878-0.37778 0.23479-0.80013 0.27660-0.47564
  -1   7   7   92.71   12.84  19 0.93873-0.94701 0.23484 0.20519 0.27676 0.22223
  26  -6  -6  281.53   22.79  19 0.93873-0.40430 0.23484-0.61171 0.27676-0.69031
  15   1  -7  117.43   13.25  19 0.93861-0.63678 0.23495-0.17205 0.27707-0.76802
  -3   5   3   30.57    6.62  19 0.93856-0.99610 0.23501 0.07926 0.27722-0.06483
  21  -7  -4  198.88   15.02  19 0.93850-0.50521 0.23506-0.67477 0.27738-0.55104
  -1   5   8   46.15   11.96  19 0.93845-0.94489 0.23512 0.07917 0.27753 0.29284
  16   0  -7  116.57   13.62  19 0.93839-0.61556 0.23517-0.23509 0.27769-0.76806
   8   6  -5  561.02   17.72  19 0.93839-0.77979 0.23517 0.14191 0.27769-0.62995
  -1  -1   310196.40  257.11  19 0.93817-0.95365 0.23539-0.29827 0.27830-0.06481
  13  -5  11    9.80   14.18  19 0.93806-0.64499 0.23550-0.54994 0.27861 0.51355
   0   4   9   52.73   12.96  19 0.93800-0.92161 0.23556 0.01585 0.27877 0.36354
  14   4  -7   80.35   10.90  19 0.93789-0.65706 0.23567 0.01573 0.27908-0.77062
  -3   5   5  818.46   26.63  19 0.93783-0.99169 0.23572 0.07855 0.27923 0.07589
  24 -10   0   49.95   11.54  19 0.93783-0.43423 0.23572-0.86404 0.27923-0.26599
   5   3  -4  374.62   12.92  19 0.93778-0.84024 0.23577-0.04722 0.27938-0.56196
   1   7   9   12.84   12.39  19 0.93721-0.89988 0.23632 0.20374 0.28093 0.36195
  -1  -1   5   86.73    7.60  19 0.93710-0.94891 0.23643-0.29933 0.28124 0.07497
   1  -1   8  317.97   15.28  19 0.93682-0.90120 0.23670-0.29965 0.28201 0.28943
  26  -8  -4   43.33   15.07  19 0.93676-0.39859 0.23676-0.73925 0.28216-0.55305
  22  -8  -3   15.51   11.29  19 0.93676-0.48066 0.23676-0.73933 0.28216-0.48398
  17  -3  -6    9.17   16.74  19 0.93676-0.59111 0.23676-0.42516 0.28216-0.70068
  21  -9  -1   62.58   10.86  19 0.93665-0.49782 0.23687-0.80233 0.28247-0.34221
   4  10   9   80.11   16.00  19 0.93653-0.83623 0.23698 0.39173 0.28278 0.36174
  19  -9   0   61.21    9.52  19 0.93648-0.53775 0.23703-0.80251 0.28293-0.27244
  -2   0   4  801.42   23.65  19 0.93648-0.97112 0.23703-0.23707 0.28293 0.00137
   8  -6   1  966.37   25.73  19 0.93648-0.76672 0.23703-0.61409 0.28293-0.20718
   0  -2   3   50.28    4.28  19 0.93619-0.93067 0.23730-0.36304 0.28371-0.06966
  19   5  -8   25.22    9.69  20 0.93596-0.55211 0.23752 0.07671 0.28432-0.84440
   0  -2   5   33.01    5.00  20 0.93579-0.92663 0.23768-0.36345 0.28478 0.07198
  16  10  -6   38.60    9.49  20 0.93574-0.61116 0.23774 0.39070 0.28494-0.70412
   4  -4   7   91.38    8.42  20 0.93568-0.83884 0.23779-0.48929 0.28509 0.21659
   7  -5   8  502.85   18.83  20 0.93562-0.77399 0.23785-0.55222 0.28525 0.28946
  23  -1  -8  188.43   16.15  20 0.93562-0.46785 0.23785-0.30058 0.28525-0.84309
   4  12   2  438.75   16.85  20 0.93556-0.84811 0.23790 0.51643 0.28540-0.14054
  -2   2   7   52.64    7.67  20 0.93551-0.96470 0.23795-0.11229 0.28556 0.21286
   3  11   1   37.01    5.80  20 0.93545-0.87080 0.23801 0.45343 0.28571-0.21275
   0   0   8   45.30    8.21  20 0.93534-0.92072 0.23812-0.23820 0.28602 0.28488
   2  -2   8   96.78    9.74  20 0.93534-0.87866 0.23812-0.36391 0.28602 0.28595
  10  -4  -3  455.26   16.14  20 0.93534-0.73100 0.23812-0.48942 0.28602-0.49448
   4  12   6   57.60   13.18  20 0.93511-0.84034 0.23834 0.51609 0.28663 0.14372
  29  -5  -7  -29.41   20.59  20 0.93505-0.33955 0.23839-0.55238 0.28679-0.76993
   3  11   7   46.60   13.52  20 0.93505-0.85937 0.23839 0.45314 0.28679 0.21439
  11  -3  12   -3.04   16.28  20 0.93499-0.68206 0.23844-0.42716 0.28694 0.57551
  19   3  -8   -0.04   12.13  20 0.93493-0.55104 0.23850-0.04993 0.28710-0.84712
   0   2   9   91.83   12.22  20 0.93488-0.91840 0.23855-0.11289 0.28725 0.35503
  -2   2   1  148.67    9.50  20 0.93470-0.97486 0.23872-0.11302 0.28771-0.21748
  14  -8   7   10.93    6.00  20 0.93470-0.62798 0.23872-0.74160 0.28771 0.21945
  15  -5  -4  788.21   26.63  20 0.93470-0.62732 0.23872-0.55283 0.28771-0.56473
   3   3  -3  550.58   15.85  20 0.93465-0.87724 0.23877-0.05021 0.28787-0.50023
  11   9  -5   58.33    6.48  20 0.93447-0.71293 0.23893 0.32668 0.28833-0.63894
   8   2  -5  500.37   17.38  20 0.93430-0.77563 0.23909-0.11337 0.28879-0.64101
  18  -6  -4   47.90   11.39  20 0.93412-0.56377 0.23926-0.61616 0.28925-0.56458
  23  -5  -6  197.90   18.51  20 0.93407-0.46255 0.23931-0.55334 0.28941-0.70459
  -2   0   5  337.25   14.20  20 0.93378-0.96661 0.23958-0.23963 0.29017 0.06549
   8  -4  -2  205.64   10.71  20 0.93378-0.76955 0.23958-0.49091 0.29017-0.42841
   8  -4  10   15.30   11.61  20 0.93366-0.74740 0.23969-0.49126 0.29048 0.42755
  -2   6   7   17.47   10.71  20 0.93354-0.96275 0.23980 0.13735 0.29079 0.20763
  -3   3   6   67.19   10.17  20 0.93354-0.98553 0.23980-0.05126 0.29079 0.13570
  22  -6  -5  186.54   16.78  20 0.93349-0.48111 0.23985-0.61675 0.29094-0.63540
   0   6   9    7.59   12.71  20 0.93325-0.91688 0.24007 0.13710 0.29156 0.35075
  12  -2  -5  535.62   20.11  20 0.93314-0.69053 0.24018-0.36578 0.29187-0.64185
  20  -4  -6  180.84   17.30  20 0.93314-0.52456 0.24018-0.49141 0.29187-0.70873
  20   6  -8   28.53   14.34  20 0.93308-0.52824 0.24023 0.13683 0.29202-0.85154
   1   3  10    2.41   13.83  20 0.93302-0.89374 0.24029-0.05176 0.29217 0.42205
  20  -2  -7   49.50   14.85  20 0.93273-0.52602 0.24056-0.36613 0.29294-0.78113
   8  -6   7    3.87    6.13  20 0.93255-0.75177 0.24072-0.61793 0.29340 0.21047
  26  -2  -8   33.73   23.58  20 0.93255-0.40183 0.24072-0.36624 0.29340-0.84952
  -2   0   333214.80  832.87  20 0.93255-0.96902 0.24072-0.24075 0.29340-0.08046
  -3   5   6   10.38    8.80  20 0.93255-0.98455 0.24072 0.07356 0.29340 0.13308
   5  -5   6  153.38    8.22  20 0.93249-0.81650 0.24077-0.55510 0.29356 0.13731
   1   9   8   28.95   13.11  20 0.93220-0.89671 0.24104 0.32477 0.29432 0.27715
  11   5  -6   64.00    8.46  20 0.93214-0.71240 0.24110 0.07314 0.29448-0.71636
  22   0  -8   12.18   16.54  20 0.93214-0.48534 0.24110-0.24100 0.29448-0.85287
  10  -4  11   27.63   14.68  20 0.93202-0.70192 0.24120-0.49278 0.29479 0.49572
  -1   9   4   59.93    9.42  20 0.93202-0.94576 0.24120 0.32453 0.29479-0.00994
   0   8   8   35.78   12.59  20 0.93190-0.91738 0.24131 0.26162 0.29509 0.27583
  20   2  -8  -12.41   14.43  20 0.93149-0.52663 0.24169-0.11594 0.29617-0.85565
  27  -7  -5   -2.58   17.87  20 0.93125-0.37401 0.24190-0.68162 0.29678-0.63848
  -1   1   8   88.55   11.65  20 0.93119-0.93758 0.24196-0.17917 0.29693 0.27342
   9   7  -5   74.60    6.24  20 0.93119-0.75161 0.24196 0.19797 0.29693-0.64865
  11   3  -6  202.94   11.87  20 0.93101-0.71126 0.24212-0.05355 0.29739-0.71927
  28  -6  -6   77.28   20.74  20 0.93101-0.35464 0.24212-0.61897 0.29739-0.70983
  -1   9   5   40.67    9.70  20 0.93072-0.94265 0.24239 0.32337 0.29816 0.05806
  19  -5  -5    1.31   12.15  20 0.93066-0.54118 0.24244-0.55649 0.29831-0.64439
  -2   8   4  125.87   10.09  20 0.93066-0.96542 0.24244 0.26044 0.29831-0.01402
  21   1  -8   90.70   16.49  20 0.93066-0.50484 0.24244-0.17953 0.29831-0.85726
   1  -3   4  206.61    8.55  20 0.93060-0.90224 0.24250-0.43109 0.29847-0.01252
  26  -4  -7  269.96   23.41  20 0.93060-0.39805 0.24250-0.49371 0.29847-0.78334
  -3   3   2  278.57   10.37  20 0.93042-0.98977 0.24266-0.05411 0.29893-0.15790
   6  -4   9   92.15   11.54  20 0.93042-0.78793 0.24266-0.49419 0.29893 0.34660
   2  10   8    4.57   15.50  20 0.93036-0.87378 0.24271 0.38594 0.29908 0.27292
  19   9  -7   17.79   12.42  20 0.93030-0.54462 0.24276 0.32281 0.29923-0.78806
   3  -3   8  218.61   12.99  20 0.93006-0.85241 0.24298-0.43165 0.29985 0.27267
  29  -9  -3   49.71   18.30  20 0.93006-0.32714 0.24298-0.80837 0.29985-0.49780
  15   5  -7  128.68   12.27  20 0.93000-0.62819 0.24303 0.07120 0.30000-0.79097
  11  -3  -4  488.89   18.34  20 0.93000-0.70653 0.24303-0.43149 0.30000-0.57923
   0  10   4  136.69   11.23  20 0.92988-0.92267 0.24314 0.38548 0.30031-0.01491
  -1  -1   6 4829.28  125.81  20 0.92982-0.93982 0.24319-0.30612 0.30046 0.12712
   7  -5   0   84.95    5.51  20 0.92970-0.78277 0.24330-0.55751 0.30077-0.29690
  -2   8   5  232.63   13.80  20 0.92952-0.96247 0.24346 0.25943 0.30123 0.05444
  23  -3  -7   49.50   17.24  20 0.92952-0.45986 0.24346-0.43182 0.30123-0.78770
  10   8  -5    1.99    4.77  20 0.92952-0.72897 0.24346 0.25931 0.30123-0.65240
  -1   7   8   35.37   12.23  20 0.92928-0.93570 0.24368 0.19636 0.30184 0.26852
  15   3  -7   53.96   10.91  20 0.92928-0.62749 0.24368-0.05511 0.30184-0.79283
  16  -2  -6   95.08   12.84  20 0.92910-0.60444 0.24384-0.36943 0.30230-0.72139
  -2   6   1  330.58   11.10  20 0.92904-0.96924 0.24389 0.13323 0.30245-0.23223
  -1   9   3 5671.28  146.92  20 0.92904-0.94461 0.24389 0.32183 0.30245-0.08897
  -2   4   8    7.80   11.55  20 0.92891-0.95633 0.24400 0.00741 0.30276 0.26705
  -3   5   2  455.83   15.03  20 0.92885-0.98821 0.24405 0.07021 0.30291-0.16188
   0  10   5  141.00   12.06  20 0.92885-0.91980 0.24405 0.38457 0.30291 0.05385
  25  -9  -2   57.17   13.45  20 0.92855-0.40768 0.24432-0.80976 0.30368-0.43253
   3  -1  10   76.62   13.79  20 0.92837-0.84709 0.24448-0.30745 0.30414 0.41117
   1  -3   5  357.41   12.88  20 0.92825-0.89805 0.24459-0.43320 0.30444 0.05286
   0  -2   6  300.64   13.03  20 0.92807-0.91707 0.24475-0.37053 0.30490 0.12323
  20  -8  -2  907.25   29.60  20 0.92800-0.51200 0.24480-0.74739 0.30505-0.43665
   2   0  10  -36.35   12.57  20 0.92800-0.86771 0.24480-0.24490 0.30505 0.40970
  28  -8  -4  140.59   19.88  20 0.92794-0.34784 0.24485-0.74736 0.30521-0.57500
  11  -1  -5  114.47   10.56  20 0.92788-0.70625 0.24491-0.30767 0.30536-0.65588
  19  -7  -3  232.54   14.99  20 0.92776-0.53459 0.24501-0.68476 0.30567-0.50912
   9   1  -5  143.18   10.08  20 0.92770-0.74807 0.24507-0.18218 0.30582-0.65749
  -3   1   4  451.79   16.43  20 0.92758-0.98323 0.24517-0.18236 0.30612-0.02238
  20   4  -8   29.96   14.22  20 0.92746-0.52262 0.24528 0.00612 0.30643-0.86593
  -2   0   620827.60  525.89  20 0.92746-0.95842 0.24528-0.24533 0.30643 0.12060
  -2   8   3  240.07   11.72  20 0.92727-0.96385 0.24544 0.25743 0.30689-0.09396
   6  -2  11   -5.80   14.26  20 0.92727-0.78111 0.24544-0.37126 0.30689 0.48141
  -1   3   9   89.75   13.39  20 0.92709-0.93163 0.24560-0.05707 0.30735 0.33438
  19  -1  -7  100.57   14.89  20 0.92709-0.54137 0.24560-0.30835 0.30735-0.79610
   8   4  -5  377.80   13.88  20 0.92697-0.76835 0.24571 0.00570 0.30765-0.65990
  -1   5   9   69.98   13.47  20 0.92672-0.93123 0.24592 0.06836 0.30826 0.33346
   0  10   3  296.40   13.56  20 0.92660-0.92123 0.24603 0.38258 0.30857-0.09454
  -3   1   5  183.97   11.20  20 0.92660-0.98042 0.24603-0.18322 0.30857 0.04654
  -1   9   6 2483.93   70.64  20 0.92653-0.93661 0.24608 0.31968 0.30872 0.11886
  25  -1  -8  -24.83   19.77  20 0.92647-0.41674 0.24613-0.30885 0.30887-0.86557
  23  -7  -4   76.82   14.25  20 0.92604-0.45081 0.24651-0.68620 0.30994-0.58249
   4  -2  10   36.21   12.85  20 0.92604-0.82373 0.24651-0.37233 0.30994 0.40589
  10   0  -5  480.83   18.07  20 0.92579-0.72516 0.24672-0.24666 0.31055-0.66165
  -3   7   4  125.80    9.47  20 0.92548-0.98119 0.24698 0.19302 0.31132-0.02757
  -2   8   6 1185.99   37.48  20 0.92536-0.95646 0.24709 0.25581 0.31162 0.11542
  -3   3   7  104.96   10.85  20 0.92536-0.97555 0.24709-0.05856 0.31162 0.18624
   1   1  10   17.05   11.50  20 0.92524-0.88592 0.24720-0.18442 0.31193 0.40227
  12  -6  10   26.26   11.95  20 0.92524-0.65496 0.24720-0.62445 0.31193 0.40826
  15   9  -6    0.87    7.70  20 0.92517-0.62156 0.24725 0.31834 0.31208-0.73179
  13  -5  -3  309.55   13.49  20 0.92505-0.65775 0.24736-0.56147 0.31238-0.51916
  -3   7   5   -4.42    7.28  20 0.92499-0.97890 0.24741 0.19261 0.31254 0.04258
  -3   5   7   78.19   10.13  20 0.92499-0.97521 0.24741 0.06687 0.31254 0.18533
   0  10   6  384.26   18.58  20 0.92486-0.91397 0.24751 0.38113 0.31284 0.11530
  16   6  -7   37.83    9.74  20 0.92480-0.60201 0.24757 0.12950 0.31299-0.80341
  18   8  -7   -4.22   10.69  20 0.92468-0.55997 0.24767 0.25507 0.31330-0.80266
  -2   2   8   28.44    8.41  20 0.92449-0.95188 0.24783-0.12218 0.31376 0.25604
   8  -2  12  -40.25   15.75  20 0.92449-0.73451 0.24783-0.37367 0.31376 0.54703
   1   7  10  -21.49   11.86  20 0.92443-0.88521 0.24789 0.19216 0.31391 0.40033
   1  11   4    5.48    8.86  20 0.92443-0.89622 0.24789 0.44359 0.31391-0.02797
   0   4  10   16.16   10.62  20 0.92430-0.90598 0.24799 0.00341 0.31421 0.39944
  25  -5  -6 1485.58   46.92  20 0.92424-0.41077 0.24804-0.56204 0.31437-0.72840
  16   2  -7   -7.94    7.48  20 0.92411-0.60131 0.24815-0.12241 0.31467-0.80506
  13  -7   9  -28.41    9.84  21 0.92411-0.63469 0.24815-0.68824 0.31467 0.33468
  30  -6  -6    5.93   16.73  21 0.92411-0.30580 0.24815-0.62500 0.31467-0.72599
   1  11   5   73.63   10.70  21 0.92399-0.89398 0.24826 0.44326 0.31498 0.04234
  12   6  -6  228.15   12.52  21 0.92399-0.68329 0.24826 0.12882 0.31498-0.73633
  -2   6   8   12.04    8.53  21 0.92399-0.95136 0.24826 0.12890 0.31498 0.25482
  24  -8  -3   82.36   11.51  21 0.92392-0.42586 0.24831-0.75085 0.31513-0.51581
   2   2  11   18.50   11.36  21 0.92355-0.86140 0.24863-0.12298 0.31604 0.47010
  10  -6   9   29.93   10.43  21 0.92342-0.69700 0.24873-0.62600 0.31635 0.33138
  18   0  -7  187.31   12.93  21 0.92342-0.55865 0.24873-0.24864 0.31635-0.80561
  15  -7  10   -2.48   12.20  21 0.92336-0.59012 0.24879-0.68890 0.31650 0.40533
  29  -7  -5   15.38   17.80  21 0.92336-0.32416 0.24879-0.68847 0.31650-0.65706
  -4   4   4  200.34    9.83  21 0.92330-0.99997 0.24884 0.00257 0.31665-0.03346
  12   2  -6  155.05   10.37  21 0.92330-0.68258 0.24884-0.12311 0.31665-0.73798
  15  -1  -6  223.74   12.83  21 0.92323-0.61954 0.24889-0.31164 0.31680-0.73642
  16  -6  -3  366.24   15.85  21 0.92323-0.59302 0.24889-0.62585 0.31680-0.52194
   2   6  11   43.40   14.60  21 0.92317-0.86113 0.24894 0.12823 0.31696 0.46924
  -4   4   5  284.25   12.69  21 0.92311-0.99797 0.24900 0.00241 0.31711 0.03745
   4   2  12   61.38   15.97  21 0.92311-0.81713 0.24900-0.12335 0.31711 0.54152
  17   7  -7    5.50    9.23  21 0.92292-0.57918 0.24916 0.19075 0.31756-0.80746
   1   9   0 5821.84  147.81  21 0.92292-0.90202 0.24916 0.31653 0.31756-0.31704
  28  -4  -7  213.84   22.79  21 0.92285-0.34836 0.24921-0.50041 0.31772-0.80146
  19  -9   8   11.21    7.39  21 0.92254-0.50904 0.24947-0.81522 0.31848 0.26278
  15  11  -5   21.65    7.21  21 0.92235-0.61691 0.24963 0.44167 0.31893-0.66735
  19  -3  -6   32.93   36.65  21 0.92235-0.53476 0.24963-0.43804 0.31893-0.73635
  17   1  -7   35.90   11.62  21 0.92228-0.57849 0.24968-0.18676 0.31909-0.80889
  24  -6  -5  135.69   16.48  21 0.92228-0.42794 0.24968-0.62653 0.31909-0.66238
  21   5  -8   67.64   15.73  21 0.92209-0.49627 0.24984 0.06439 0.31954-0.87847
  24   0  -8   12.78   17.32  21 0.92203-0.43330 0.24989-0.24980 0.31969-0.87699
  21   3  -8   32.88   14.82  21 0.92197-0.49614 0.24995-0.06137 0.31985-0.87876
   1  -1   9  985.78   33.60  21 0.92197-0.88444 0.24995-0.31289 0.31985 0.32295
  18  -8  -1   51.25    8.95  21 0.92158-0.54568 0.25026-0.75288 0.32076-0.38213
   7  -3  11   58.81   14.85  21 0.92158-0.75443 0.25026-0.43896 0.32076 0.46809
  -3   1   6 6276.00  162.52  21 0.92152-0.97348 0.25032-0.18751 0.32091 0.10557
   6   6  -4  523.12   15.60  21 0.92133-0.80284 0.25047 0.12662 0.32137-0.60341
   0   0   9  526.18   28.82  21 0.92120-0.90474 0.25058-0.25067 0.32167 0.32060
  -3   7   6   39.79   10.81  21 0.92114-0.97323 0.25063 0.18939 0.32182 0.10467
  -3   1   318615.80  468.21  21 0.92114-0.97862 0.25063-0.18781 0.32182-0.10944
  15  -3  -5  209.82   13.79  21 0.92101-0.61544 0.25074-0.43914 0.32212-0.67040
  22  -4  -6  139.12   16.90  21 0.92101-0.47046 0.25074-0.50193 0.32212-0.73783
  22  -2  -7   90.57   16.03  21 0.92101-0.47233 0.25074-0.37628 0.32212-0.80916
   0   8   9  189.15   18.89  21 0.92094-0.90456 0.25079 0.25213 0.32228 0.32002
   6   2  -4 2320.69   61.39  21 0.92088-0.80233 0.25084-0.12512 0.32243-0.60442
   1  -3   6  331.00   13.24  21 0.92088-0.88886 0.25084-0.43948 0.32243 0.10624
  -3   7   3  421.09   15.66  21 0.92075-0.97830 0.25095 0.18905 0.32273-0.11035
   1  -3   3  404.21   11.97  21 0.92069-0.89418 0.25100-0.43959 0.32288-0.10829
   9  -5  10  -14.68   10.70  21 0.92050-0.71322 0.25116-0.56559 0.32334 0.39522
   9  -3  -3  349.02   14.26  21 0.92050-0.73712 0.25116-0.43962 0.32334-0.53233
   1  11   6   73.92   12.76  21 0.92043-0.88860 0.25121 0.44032 0.32349 0.10520
  16  -8   0  293.30   12.14  21 0.92030-0.58452 0.25131-0.75398 0.32379-0.31495
   1  11   3    8.88    7.94  21 0.92017-0.89383 0.25142 0.44006 0.32410-0.10953
   0   2  10   85.05   15.01  21 0.92017-0.90186 0.25142-0.12577 0.32410 0.38956
  30  -8  -4  124.65   20.60  21 0.92011-0.29808 0.25147-0.75400 0.32425-0.59295
  10  -2  -4   61.76    9.69  21 0.92004-0.71754 0.25152-0.37713 0.32440-0.60416
  -1  -1   7  377.59   16.15  21 0.92004-0.92820 0.25152-0.31446 0.32440 0.17454
  -1   9   7   26.34   12.07  21 0.92004-0.92827 0.25152 0.31424 0.32440 0.17456
   0   8   0 2890.61   74.26  21 0.91998-0.92006 0.25158 0.25125 0.32455-0.32458
  14   0  -6  146.63   12.99  21 0.91992-0.63722 0.25163-0.25156 0.32471-0.74490
  14   8  -6  -18.03    7.67  21 0.91992-0.63730 0.25163 0.25113 0.32471-0.74498
  25  -3  -7   32.46   18.51  21 0.91985-0.40825 0.25168-0.44004 0.32486-0.81022
  13   1  -6  148.68   12.59  21 0.91972-0.65801 0.25179-0.18888 0.32516-0.74591
   4  -4   8  355.33   15.50  21 0.91966-0.82102 0.25184-0.50338 0.32531 0.24775
  13   7  -6    0.31    7.63  21 0.91966-0.65800 0.25184 0.18808 0.32531-0.74613
   2  -2   9   93.00   12.62  21 0.91953-0.86106 0.25194-0.37778 0.32562 0.31774
  23   1  -8  205.27   20.60  21 0.91953-0.45175 0.25194-0.18902 0.32562-0.88342
  22   2  -8   39.71   16.46  21 0.91940-0.47259 0.25205-0.12629 0.32592-0.88426
  23  -9  -1   52.12   11.54  21 0.91940-0.43863 0.25205-0.81751 0.32592-0.38455
  11  -5  11  -11.06   14.55  21 0.91920-0.66808 0.25221-0.56662 0.32637 0.46465
  24 -10   1   19.70    9.63  21 0.91914-0.41367 0.25226-0.88058 0.32653-0.24194
  -4   4   6   64.34   10.34  21 0.91907-0.99212 0.25231-0.00091 0.32668 0.09926
   5  -3  -117026.80  427.56  21 0.91907-0.81596 0.25231-0.44082 0.32668-0.39524
   4  12   1   24.93    5.67  21 0.91894-0.83331 0.25242 0.50189 0.32698-0.25348
  -2   8   7   34.75   11.80  21 0.91882-0.94809 0.25252 0.25039 0.32728 0.17114
  14  -4  -4   21.88    9.39  21 0.91882-0.63239 0.25252-0.50378 0.32728-0.60482
   0  10   7   35.60   12.28  21 0.91855-0.90582 0.25273 0.37592 0.32789 0.17162
  -1   9   2   88.02    8.06  21 0.91855-0.93596 0.25273 0.31298 0.32789-0.18577
  -2   0   7   41.12    9.93  21 0.91849-0.94761 0.25278-0.25284 0.32804 0.17035
  20  -6  -4   64.92   12.65  21 0.91842-0.50611 0.25283-0.62971 0.32819-0.60238
  16   4  -7   31.18   10.82  21 0.91842-0.59562 0.25283-0.00143 0.32819-0.81858
  -1   7   9    4.28   13.91  21 0.91810-0.92273 0.25310 0.18695 0.32895 0.31280
  32  -6  -6   66.32   37.59  21 0.91810-0.25783 0.25310-0.62990 0.32895-0.73913
   5  -5   7   89.20    8.13  21 0.91797-0.80015 0.25320-0.56756 0.32925 0.17297
  17  -7  -2   92.23   10.77  21 0.91790-0.56482 0.25325-0.69301 0.32940-0.46264
  -1   1   9  812.41   31.19  21 0.91777-0.92228 0.25336-0.19058 0.32971 0.31201
  11  -5  -2  614.30   19.84  21 0.91777-0.69060 0.25336-0.56750 0.32971-0.46627
   0  -2   7    2.48    8.30  21 0.91771-0.90488 0.25341-0.37921 0.32986 0.16964
  -4   4   3  127.54    8.97  21 0.91712-0.99563 0.25388-0.00248 0.33122-0.11939
  -2   4   9   -3.68   12.10  21 0.91692-0.94247 0.25403-0.00263 0.33167 0.30951
  21  -5  -5   83.99   14.57  21 0.91679-0.48539 0.25414-0.56820 0.33198-0.67696
  27  -9  -2   39.75   15.38  21 0.91679-0.35397 0.25414-0.81955 0.33198-0.45971
  31  -7  -5   89.93   23.42  21 0.91646-0.27531 0.25440-0.69406 0.33273-0.67217
  -4   6   5   84.38    9.98  21 0.91646-0.99129 0.25440 0.12274 0.33273 0.02182
   9  -5  -110276.10  259.74  21 0.91626-0.72919 0.25455-0.56872 0.33319-0.39953
  -1  -1   2  302.27    9.75  21 0.91613-0.93343 0.25466-0.31753 0.33349-0.19135
   2  10   0 1353.26   36.27  21 0.91613-0.87426 0.25466 0.37389 0.33349-0.33242
  12   4  -6    3.67    8.27  21 0.91606-0.67532 0.25471-0.00331 0.33364-0.75494
   2  12   5   55.83   12.14  21 0.91599-0.86499 0.25476 0.49961 0.33379 0.02406
  18  -4  -5  124.93   13.28  21 0.91593-0.54746 0.25481-0.50606 0.33394-0.68059
  11  -7   8   68.93    8.05  21 0.91586-0.67026 0.25487-0.69494 0.33409 0.24279
   0  10   2  116.56    8.43  21 0.91580-0.91226 0.25492 0.37367 0.33424-0.19159
   7  -5   9    5.23    9.68  21 0.91573-0.75227 0.25497-0.56938 0.33439 0.31168
  -2   8   2  304.80   12.03  21 0.91573-0.95413 0.25497 0.24788 0.33439-0.19283
  -4   2   5  193.61   11.46  21 0.91573-0.99053 0.25497-0.12930 0.33439 0.02016
  -3   5   8   11.34   11.27  21 0.91553-0.96387 0.25513 0.05915 0.33485 0.23439
  -4   6   4  379.07   15.42  21 0.91553-0.99220 0.25513 0.12201 0.33485-0.05166
  17  -5  -4  109.45   12.74  21 0.91546-0.56609 0.25518-0.56924 0.33500-0.61086
   2  12   4  -14.62    9.82  21 0.91533-0.86616 0.25528 0.49908 0.33530-0.04882
  27  -5  -6 1934.86   60.28  21 0.91533-0.35995 0.25528-0.56932 0.33530-0.74829
  -3   3   8   18.11   11.74  21 0.91520-0.96357 0.25539-0.06686 0.33560 0.23364
  -3   7   7   79.18   12.36  21 0.91480-0.96498 0.25570 0.18432 0.33651 0.16134
   7  -3  -2  153.96    8.65  21 0.91467-0.77142 0.25580-0.44428 0.33681-0.47559
  16  -8   9    9.89    9.02  21 0.91460-0.56221 0.25585-0.75879 0.33696 0.31403
  25  -7  -4  -29.48   14.03  21 0.91446-0.39730 0.25596-0.69566 0.33726-0.60871
   1  11   7  -12.33   13.58  21 0.91446-0.88075 0.25596 0.43557 0.33726 0.16280
  -4   2   4 1596.56   44.49  21 0.91440-0.99107 0.25601-0.13034 0.33741-0.05422
  22   4  -8  -16.62   15.43  21 0.91433-0.46752 0.25606-0.00466 0.33756-0.89590
  21  -1  -7   56.18   15.46  21 0.91400-0.48631 0.25632-0.31905 0.33832-0.82591
  14  -6  -2   58.05    8.18  21 0.91353-0.62340 0.25668-0.63364 0.33937-0.47428
  -3   1   7  338.38   16.22  21 0.91353-0.96366 0.25668-0.19388 0.33937 0.15847
  -4   6   6   36.03    9.63  21 0.91332-0.98640 0.25684 0.12031 0.33983 0.08611
  32  -8  -4   76.02   23.59  21 0.91332-0.24934 0.25684-0.75931 0.33983-0.60739
   3  -3   9   70.10   11.27  21 0.91332-0.83381 0.25684-0.44552 0.33983 0.30405
  -1   5  10   24.58   14.31  21 0.91326-0.91592 0.25689 0.05739 0.33998 0.37312
   2  12   6   -1.54   12.27  21 0.91312-0.86031 0.25699 0.49742 0.34028 0.08895
  21  -9   0   45.90    9.10  21 0.91299-0.47231 0.25709-0.82257 0.34058-0.32897
   8  -6   8   61.39    8.41  21 0.91285-0.73021 0.25720-0.63443 0.34088 0.23435
  -1   3  10    9.70   12.92  21 0.91285-0.91554 0.25720-0.06867 0.34088 0.37222
   9  -1  -4  232.25   11.68  21 0.91285-0.73136 0.25720-0.31998 0.34088-0.62121
  18  -2  -6  123.81   13.60  21 0.91272-0.54611 0.25730-0.38287 0.34118-0.75914
  -2   6   9   55.52   13.20  21 0.91265-0.93826 0.25735 0.11981 0.34133 0.29986
  19  -9   1   92.31    8.69  21 0.91258-0.51200 0.25740-0.82291 0.34148-0.25965
  -4   4   7  239.17   14.11  21 0.91231-0.98346 0.25761-0.00621 0.34209 0.15521
  -4   2   6  337.12   14.63  21 0.91218-0.98519 0.25771-0.13205 0.34239 0.08354
  26  -8  -3    0.30   12.90  21 0.91218-0.37218 0.25771-0.76027 0.34239-0.54198
  26  -6  -5   61.70   14.60  21 0.91204-0.37576 0.25782-0.63467 0.34269-0.68488
   8  -4  11   11.83   13.08  21 0.91184-0.72372 0.25797-0.50956 0.34314 0.44627
   7   1  -4  226.34    9.96  21 0.91184-0.77230 0.25797-0.19508 0.34314-0.62457
  -2   2   9   18.63    8.73  21 0.91177-0.93726 0.25802-0.13237 0.34329 0.29787
  -1   9   8   15.25   10.97  21 0.91150-0.91794 0.25823 0.30756 0.34389 0.22646
  21   9  -7  -28.89   15.53  21 0.91136-0.48374 0.25833 0.30725 0.34419-0.83189
  21  -7  -3   74.11    9.78  21 0.91116-0.47603 0.25849-0.69821 0.34464-0.54698
  27  -3  -7    8.11   13.37  21 0.91109-0.35757 0.25854-0.44691 0.34479-0.82909
  -2   0   2  980.45   26.55  21 0.91102-0.94933 0.25859-0.25861 0.34494-0.20336
  22  -8  -2   31.90   10.15  22 0.91088-0.45293 0.25869-0.76127 0.34525-0.47572
  17   3  -7   71.14    9.37  22 0.91082-0.56706 0.25874-0.07017 0.34540-0.83525
  14  -2  -5  827.45   26.59  22 0.91068-0.62611 0.25885-0.38443 0.34570-0.69454
  15  -7  -1  539.52   18.50  22 0.91068-0.59772 0.25885-0.69865 0.34570-0.40872
   4   0  12   13.50   13.48  22 0.91068-0.80472 0.25885-0.25897 0.34570 0.51294
  33  -7  -5   30.70   22.88  22 0.91061-0.22752 0.25890-0.69854 0.34585-0.68416
   9   3  -5  141.16    8.37  22 0.91047-0.73084 0.25900-0.07043 0.34615-0.69780
   1  -3   7  265.11   12.47  22 0.91040-0.87654 0.25905-0.44770 0.34630 0.15373
   2  -4   5   64.57    6.30  22 0.91034-0.85916 0.25910-0.51058 0.34645 0.01140
   2   0  11   -0.88   11.06  22 0.91034-0.84815 0.25910-0.25920 0.34645 0.43966
   6  -4  10   26.99   10.81  22 0.91027-0.76595 0.25915-0.51072 0.34660 0.37031
  -2   8   8  -21.01   10.49  22 0.91027-0.93764 0.25915 0.24375 0.34660 0.22319
   0  10   8   84.64   14.43  22 0.91020-0.89563 0.25920 0.36946 0.34675 0.22414
  24  -2  -7  207.90   15.40  22 0.91013-0.41953 0.25926-0.38481 0.34690-0.83284
   2   4  12   -2.40   14.68  22 0.91006-0.84616 0.25931-0.00791 0.34705 0.51053
  17   5  -7   92.13   11.13  22 0.91006-0.56631 0.25931 0.05493 0.34705-0.83690
   3  -1  11    7.15   12.58  22 0.90992-0.82672 0.25941-0.32237 0.34735 0.43929
  23   3  -8   -6.90   14.71  22 0.90979-0.44202 0.25951-0.07093 0.34765-0.90546
  24  -4  -6  303.22   19.59  22 0.90972-0.41723 0.25956-0.51074 0.34780-0.76237
   8   0  -4 2407.37   64.12  22 0.90965-0.74914 0.25962-0.25957 0.34795-0.62884
  13  -7   0   45.55    6.24  22 0.90958-0.63676 0.25967-0.69952 0.34810-0.34091
   2  12   3   12.36    8.37  22 0.90937-0.86206 0.25982 0.49453 0.34855-0.13344
  25   1  -8   18.99   18.55  22 0.90931-0.39961 0.25987-0.19695 0.34870-0.90543
   9   5  -5  109.50    7.80  22 0.90924-0.72964 0.25992 0.05432 0.34885-0.70054
  20   0  -7   13.35   13.09  22 0.90896-0.50224 0.26013-0.26002 0.34945-0.83757
  21  -3  -6  201.79   16.72  22 0.90855-0.47902 0.26043-0.44884 0.35035-0.76666
  24   2  -8   65.18   19.42  22 0.90820-0.41946 0.26069-0.13494 0.35110-0.90836
   1   1  11   -1.18   14.71  22 0.90820-0.86700 0.26069-0.19791 0.35110 0.43446
  -4   6   3  236.76   10.97  22 0.90820-0.98669 0.26069 0.11644 0.35110-0.13927
  -1  -1   8  108.13   12.13  22 0.90813-0.91441 0.26074-0.32368 0.35125 0.21906
   4   2  -3  281.35    9.92  22 0.90799-0.82957 0.26084-0.13512 0.35155-0.56333
   1  11   2  261.00   11.82  22 0.90785-0.88331 0.26095 0.43050 0.35185-0.20864
  18  10  -6   40.16    9.94  22 0.90764-0.54112 0.26110 0.36735 0.35230-0.77038
  -4   6   7   63.83   11.97  22 0.90736-0.97860 0.26130 0.11585 0.35290 0.14441
  29  -5  -6  335.30   26.30  22 0.90736-0.31003 0.26130-0.57532 0.35290-0.76475
  12  -6  -1 1190.56   33.49  22 0.90736-0.65737 0.26130-0.63831 0.35290-0.41759
   6   4  -4   98.43    6.46  22 0.90729-0.78876 0.26135-0.00995 0.35305-0.63505
  -2   0   8  131.50   12.64  22 0.90729-0.93458 0.26135-0.26143 0.35305 0.21671
   8  -2  -3 1021.56   29.72  22 0.90715-0.74477 0.26146-0.38708 0.35335-0.56289
  18   2  -7   15.42   11.85  22 0.90695-0.54221 0.26161-0.13586 0.35380-0.84309
  14  -8   8   24.51    6.86  22 0.90660-0.59803 0.26186-0.76479 0.35454 0.22398
   4  -2  11    7.55   15.11  22 0.90653-0.80238 0.26191-0.38777 0.35469 0.43252
  19   1  -7   73.28   13.59  22 0.90646-0.52072 0.26196-0.19904 0.35484-0.84355
   7   7  -4  285.22    9.82  22 0.90646-0.76700 0.26196 0.17797 0.35484-0.63634
  29  -9  -2   76.22   17.41  22 0.90646-0.30169 0.26196-0.82738 0.35484-0.48147
  -3   7   2   15.08    5.31  22 0.90639-0.96576 0.26202 0.17797 0.35499-0.21398
   1  11   8   20.39   16.11  22 0.90632-0.87082 0.26207 0.42950 0.35514 0.21631
  -3   7   8    9.42   11.66  22 0.90624-0.95458 0.26212 0.17790 0.35529 0.21393
   2  -4   4  516.04   15.16  22 0.90603-0.85668 0.26227-0.51372 0.35574-0.06925
  22 -10   3  121.42    8.31  22 0.90582-0.43861 0.26242-0.89082 0.35619-0.13004
   2  -4   6  162.61    8.78  22 0.90547-0.85245 0.26268-0.51417 0.35694 0.07227
  -4   2   7  106.60   11.52  22 0.90540-0.97658 0.26273-0.13707 0.35709 0.14021
   0   0  10   80.43   13.83  22 0.90533-0.88696 0.26278-0.26287 0.35724 0.35638
   1  -1  10   61.92   13.82  22 0.90526-0.86590 0.26283-0.32579 0.35739 0.35678
  20   8  -7   81.25   13.84  22 0.90519-0.49854 0.26288 0.23987 0.35754-0.84578
   0  -2   8  102.00   11.08  22 0.90512-0.89045 0.26293-0.38875 0.35769 0.21318
  13   3  -6  162.78   11.56  22 0.90512-0.64344 0.26293-0.07436 0.35769-0.77846
  17  -1  -6  431.44   19.90  22 0.90491-0.55928 0.26308-0.32583 0.35813-0.77664
   9  -7   6   13.30    4.03  22 0.90484-0.70489 0.26313-0.70316 0.35828 0.07477
  18   6  -7    3.22   10.95  22 0.90477-0.54005 0.26318 0.11389 0.35843-0.84775
  -4   2   3  293.32   11.62  22 0.90455-0.98302 0.26334-0.13765 0.35888-0.14705
   0  -2   2  792.49   21.04  22 0.90441-0.90073 0.26344-0.38916 0.35918-0.21649
  12  -4  -3  190.66   11.73  22 0.90441-0.65812 0.26344-0.51473 0.35918-0.56652
  -3   5   9   46.82   12.94  22 0.90420-0.95069 0.26359 0.05068 0.35963 0.28098
  27  -7  -4   62.90   15.80  22 0.90406-0.34496 0.26369-0.70341 0.35993-0.63028
  -1   7   0  359.78   10.96  22 0.90391-0.92498 0.26379 0.17618 0.36022-0.36081
   9   9  -4    6.19    3.59  22 0.90377-0.72236 0.26389 0.30174 0.36052-0.64092
  23  -5  -5  115.51   15.93  22 0.90377-0.43042 0.26389-0.57793 0.36052-0.70438
  22  -6  -4   81.50   13.76  22 0.90335-0.44893 0.26420-0.64083 0.36142-0.63427
  13   5  -6  -15.49    8.41  22 0.90327-0.64140 0.26425 0.04998 0.36157-0.78210
  25  -9  -1  125.65   13.97  22 0.90327-0.38042 0.26425-0.82940 0.36157-0.41893
  13  -3  -4  778.39   25.55  22 0.90299-0.63734 0.26445-0.45273 0.36216-0.64004
  29  -3  -7   49.55   21.89  22 0.90299-0.30735 0.26445-0.45256 0.36216-0.84485
  -3   3   9   41.40   13.27  22 0.90285-0.94986 0.26455-0.07607 0.36246 0.27830
  -3   1   8   83.07   11.78  22 0.90285-0.95158 0.26455-0.20186 0.36246 0.20685
  -4   4   8   99.10   13.66  22 0.90285-0.97266 0.26455-0.01316 0.36246 0.20632
  -2   4  10    0.49   14.35  22 0.90285-0.92706 0.26455-0.01316 0.36246 0.35029
  19   7  -7   29.36   11.79  22 0.90270-0.51682 0.26465 0.17519 0.36276-0.85122
  28  -6  -5  -12.64   18.12  22 0.90256-0.32416 0.26475-0.64124 0.36306-0.70375
  -5   5   5  637.99   22.59  22 0.90242-0.99864 0.26485 0.04943 0.36336-0.00936
  -1   1  10   21.73   13.22  22 0.90227-0.90534 0.26495-0.20227 0.36365 0.34959
  13  -1  -5  449.44   18.57  22 0.90220-0.63840 0.26500-0.32765 0.36380-0.71296
  18  -6  -3   44.33   10.43  22 0.90191-0.52956 0.26520-0.64191 0.36440-0.56821
   2  -2  10    8.52   12.07  22 0.90163-0.84165 0.26541-0.39142 0.36499 0.34988
   4  -4   9   10.73   10.02  22 0.90163-0.80139 0.26541-0.51713 0.36499 0.27952
  23  -1  -7  221.33   18.82  22 0.90148-0.43162 0.26551-0.32805 0.36529-0.85130
  28  -8  -3   -3.75   16.08  22 0.90141-0.31933 0.26556-0.76776 0.36544-0.56367
  17  -3  -5  179.80   14.12  22 0.90134-0.55362 0.26561-0.45383 0.36559-0.71249
  14  10  -5   41.87    6.50  22 0.90127-0.61669 0.26566 0.36273 0.36574-0.71456
   5  -5   8  430.59   16.84  22 0.90127-0.78179 0.26566-0.58018 0.36574 0.20790
  -5   5   6   -1.22    9.27  22 0.90083-0.99522 0.26596 0.04833 0.36663 0.05876
  -5   3   5  704.85   23.75  22 0.90076-0.99690 0.26601-0.07750 0.36678-0.01279
   6  -6   5  592.50   17.01  22 0.90040-0.76534 0.26626-0.64350 0.36752-0.00748
  10   2  -5  185.35   10.79  22 0.90018-0.69937 0.26641-0.14064 0.36797-0.71886
  31  -5  -6  158.13   25.10  22 0.90018-0.26075 0.26641-0.58008 0.36797-0.77826
  26  -2  -7  117.33   19.93  22 0.89989-0.36713 0.26661-0.39193 0.36856-0.85289
  -3   9   5  173.48   13.02  22 0.89982-0.95412 0.26666 0.29921 0.36871-0.01362
   2   2  -2  331.45   10.00  22 0.89982-0.86147 0.26666-0.14094 0.36871-0.51024
  20  -4  -5  141.94   14.40  22 0.89953-0.48891 0.26686-0.51788 0.36931-0.71454
   8   8  -4  134.09    6.52  22 0.89946-0.73891 0.26691 0.23584 0.36946-0.65031
  -2   8   9  592.52   27.20  22 0.89946-0.92549 0.26691 0.23612 0.36946 0.27185
   5  -3  11   98.97   15.31  22 0.89931-0.77446 0.26701-0.45591 0.36975 0.41816
   3  11   0   96.88    5.71  22 0.89924-0.83652 0.26706 0.42441 0.36990-0.36835
  16   0  -6    1.68   11.08  22 0.89924-0.57436 0.26706-0.26687 0.36990-0.78865
  18   4  -7   32.05   11.56  22 0.89924-0.53429 0.26706-0.01565 0.36990-0.85885
  -5   3   6  423.73   17.97  22 0.89924-0.99357 0.26706-0.07856 0.36990 0.05549
  26  -4  -6 1916.14   59.04  22 0.89916-0.36454 0.26711-0.51800 0.37005-0.78309
  -5   5   4  249.09   12.55  22 0.89902-0.99699 0.26721 0.04707 0.37035-0.08774
  -2  10   5   36.52    9.79  22 0.89902-0.93230 0.26721 0.36155 0.37035-0.01471
  10  -6  10   26.22   10.52  22 0.89895-0.67087 0.26726-0.64475 0.37050 0.34870
   4   6  -3  252.08    7.98  22 0.89895-0.82051 0.26726 0.10983 0.37050-0.58227
  15  -5  -3   41.57    8.96  22 0.89880-0.58937 0.26736-0.58128 0.37079-0.57627
  -4   6   8    4.30   11.21  22 0.89873-0.96856 0.26741 0.10979 0.37094 0.19783
  14   2  -6  130.54   11.48  22 0.89865-0.61573 0.26746-0.14167 0.37109-0.79097
  12  -6  11   15.60   13.43  22 0.89865-0.62677 0.26746-0.64500 0.37109 0.42063
  -3   9   6  971.78   33.44  22 0.89858-0.95107 0.26751 0.29838 0.37124 0.05526
  -3   5   1   58.26    5.16  22 0.89851-0.95981 0.26756 0.04670 0.37139-0.30176
  20  -8  -1   73.81   10.09  22 0.89814-0.48015 0.26781-0.77019 0.37213-0.43226
  -2  10   6  318.12   17.38  22 0.89785-0.92933 0.26801 0.36078 0.37272 0.05432
  -4   4   2  478.51   15.37  22 0.89770-0.97819 0.26811-0.01671 0.37302-0.23259
  -1   5  11   16.40   12.43  22 0.89770-0.89906 0.26811 0.04619 0.37302 0.41170
  12   0  -5  516.03   18.20  22 0.89719-0.65441 0.26846-0.26832 0.37406-0.72382
   1  -3   8  154.15   10.67  22 0.89711-0.86169 0.26851-0.45733 0.37420 0.19725
  15   1  -6  199.93   11.90  22 0.89704-0.59314 0.26856-0.20557 0.37435-0.79367
  -4   8   5   77.83    8.40  22 0.89689-0.97215 0.26866 0.23431 0.37465-0.02011
  -2   2  10   31.06   10.42  22 0.89689-0.92102 0.26866-0.14309 0.37465 0.33806
  20  -2  -6   55.30   10.19  23 0.89682-0.48805 0.26871-0.39410 0.37480-0.79129
  19  -5  -4   69.84    9.39  23 0.89667-0.50519 0.26881-0.58267 0.37509-0.64962
  -5   3   4  331.93   12.99  23 0.89667-0.99455 0.26881-0.08030 0.37509-0.09248
   7  -1  -3  363.91   12.74  23 0.89660-0.75505 0.26886-0.33158 0.37524-0.58522
  -3   9   4   74.93    8.45  23 0.89652-0.95256 0.26891 0.29692 0.37539-0.09169
  -1   3  11    8.74   11.56  23 0.89645-0.89786 0.26896-0.08050 0.37554 0.40920
  13  -7  10   45.24   12.13  23 0.89645-0.60534 0.26896-0.70927 0.37554 0.34527
  -3   1   2 2038.59   53.08  23 0.89630-0.95572 0.26906-0.20626 0.37583-0.23484
   9  -5  11  -26.88   13.75  23 0.89623-0.68732 0.26911-0.58375 0.37598 0.41408
  11   1  -5  108.23    8.25  23 0.89615-0.67435 0.26916-0.20620 0.37613-0.72645
   6  -6   6   71.75    6.39  23 0.89608-0.75921 0.26921-0.64650 0.37628 0.05513
   6  -2  -2 1952.48   51.41  23 0.89600-0.77362 0.26926-0.39484 0.37643-0.51567
  17   9  -6    4.77    9.67  23 0.89600-0.55028 0.26926 0.29625 0.37643-0.79479
  -4   8   6  711.68   25.66  23 0.89593-0.96943 0.26931 0.23369 0.37657 0.04937
  16  -4  -4 1052.48   32.33  23 0.89586-0.56727 0.26936-0.52041 0.37672-0.65289
  -4   2   8   26.50    8.59  23 0.89571-0.96549 0.26946-0.14388 0.37702 0.19174
  -5   5   7   66.63    9.89  23 0.89571-0.98831 0.26946 0.04483 0.37702 0.11978
  -2  10   4  186.87   12.10  23 0.89563-0.93072 0.26951 0.35923 0.37717-0.09293
   2  -4   7  220.10   11.26  23 0.89563-0.84098 0.26951-0.52114 0.37717 0.12343
  23  -7  -3  136.79   13.48  23 0.89549-0.41826 0.26961-0.70906 0.37746-0.57847
  23  -3  -6  101.51   13.56  23 0.89541-0.42372 0.26966-0.45782 0.37761-0.79240
  -3   7   9   63.01   13.13  23 0.89534-0.94241 0.26971 0.17042 0.37776 0.26300
  19  -7  -2  881.34   28.51  23 0.89534-0.50016 0.26971-0.70924 0.37776-0.50972
  22   0  -7   14.84   13.22  23 0.89519-0.44633 0.26980-0.26958 0.37805-0.86469
  24  -8  -2  316.85   17.24  23 0.89489-0.39485 0.27000-0.77229 0.37865-0.50782
  10   6  -5  101.18    7.65  23 0.89474-0.69400 0.27010 0.10696 0.37894-0.72990
  30  -6  -5   49.07   19.62  23 0.89467-0.27436 0.27015-0.64665 0.37909-0.71868
  29  -7  -4  173.93   19.35  23 0.89459-0.29340 0.27020-0.70954 0.37924-0.64814
  -1  11   5   10.04   10.74  23 0.89459-0.90685 0.27020 0.42144 0.37924-0.02305
  33  -5  -6   42.67   29.84  23 0.89444-0.21309 0.27030-0.58392 0.37953-0.78865
   3  -3  10  -13.00   11.69  23 0.89437-0.81336 0.27035-0.45925 0.37968 0.33571
  14   6  -6    5.97    8.13  23 0.89429-0.61145 0.27040 0.10665 0.37983-0.79980
   5   1  -3   29.11    5.65  23 0.89429-0.79477 0.27040-0.20749 0.37983-0.59096
  -3   9   7   50.23   13.00  23 0.89407-0.94472 0.27055 0.29535 0.38027 0.11763
  -5   3   7  194.89   13.73  23 0.89392-0.98644 0.27065-0.08215 0.38057 0.11622
  -1  11   6  124.10   14.04  23 0.89385-0.90432 0.27070 0.42099 0.38071 0.04687
  -1  -1   9  862.85   30.83  23 0.89377-0.89865 0.27075-0.33386 0.38086 0.26094
   2  12   2    9.13    6.45  23 0.89370-0.84840 0.27080 0.48364 0.38101-0.23732
  -2   0   9 5941.34  156.88  23 0.89370-0.91959 0.27080-0.27102 0.38101 0.26025
   7  -5  10   16.15   10.90  23 0.89362-0.72855 0.27085-0.58547 0.38116 0.33640
  14  -8   2   53.32    5.06  23 0.89340-0.59581 0.27099-0.77363 0.38160-0.23116
  -2  10   7   83.96   13.49  23 0.89340-0.92307 0.27099 0.35782 0.38160 0.11685
   4  -2  -1 1367.05   36.02  23 0.89317-0.81096 0.27114-0.39676 0.38204-0.45111
  -4   8   4  130.90   10.30  23 0.89295-0.96998 0.27129 0.23166 0.38249-0.09934
  19   3  -7  114.31   13.74  23 0.89287-0.50694 0.27134-0.08272 0.38263-0.87098
  -3   3   1 4390.89  111.52  23 0.89249-0.95376 0.27159-0.08305 0.38337-0.31373
  30  -8  -3  134.82   21.06  23 0.89242-0.26840 0.27164-0.77379 0.38352-0.58060
  -4   4   9   83.80   13.87  23 0.89166-0.95966 0.27213-0.02074 0.38499 0.25519
  25  -5  -5   17.53   15.55  23 0.89166-0.37619 0.27213-0.58588 0.38499-0.72739
   6   0  -3 1068.99   29.91  23 0.89159-0.77106 0.27218-0.27209 0.38514-0.59570
  -4   8   7  225.48   16.27  23 0.89159-0.96324 0.27218 0.23082 0.38514 0.11220
  21   1  -7    8.17   13.39  23 0.89129-0.46339 0.27237-0.20935 0.38573-0.87290
  28  -2  -7   18.30   19.41  23 0.89113-0.31644 0.27247-0.39776 0.38602-0.86918
   8  -6   9    6.71    8.87  23 0.89113-0.70685 0.27247-0.64991 0.38602 0.26065
  23  -9   0  195.17   12.95  23 0.89113-0.40838 0.27247-0.83769 0.38602-0.37320
  -1   9   1  193.85    8.85  23 0.89098-0.91041 0.27257 0.29319 0.38632-0.31563
  11  -7   9    7.52    8.61  23 0.89083-0.64351 0.27267-0.71292 0.38661 0.26168
  19   5  -7   -6.58   12.05  23 0.89075-0.50484 0.27272 0.04150 0.38676-0.87513
  -3   5  10   31.59   14.94  23 0.89068-0.93587 0.27277 0.04153 0.38691 0.32527
  -1  11   4   20.54    8.85  23 0.89060-0.90467 0.27282 0.41880 0.38705-0.10227
  25  -1  -7   61.99   17.27  23 0.89045-0.37867 0.27291-0.33544 0.38735-0.87222
  -3   1   9 1493.52   47.18  23 0.89037-0.93732 0.27296-0.21030 0.38750 0.25322
  20   2  -7   41.44   13.46  23 0.89037-0.48347 0.27296-0.14715 0.38750-0.87526
  16   8  -6  209.27   12.12  23 0.89022-0.56547 0.27306 0.22963 0.38779-0.80669
  28  -4  -6 1462.88   49.09  23 0.89015-0.31360 0.27311-0.52398 0.38794-0.79984
   0  -2   9  101.18   13.14  23 0.89015-0.87395 0.27311-0.39909 0.38794 0.25439
  10  -4  -2 1399.36   38.94  23 0.88992-0.68356 0.27326-0.52444 0.38838-0.52536
  24  -6  -4  391.40   20.83  23 0.88976-0.39339 0.27336-0.64992 0.38867-0.66034
  15   7  -6   69.02    9.34  23 0.88976-0.58597 0.27336 0.16651 0.38867-0.80811
  -5   7   5   57.12    9.92  23 0.88976-0.98597 0.27336 0.16671 0.38867-0.03469
  -1  11   7   -0.20   13.34  23 0.88969-0.89840 0.27341 0.41833 0.38882 0.11018
  -5   7   6   55.45   11.07  23 0.88961-0.98406 0.27345 0.16663 0.38897 0.03641
  27  -9  -1   71.64   14.04  23 0.88938-0.32458 0.27360-0.83870 0.38941-0.44563
   9  -7   7   15.65    5.36  23 0.88931-0.68761 0.27365-0.71381 0.38956 0.11487
  -3   3  10    7.80   14.06  23 0.88900-0.93413 0.27385-0.08537 0.39014 0.32200
  12  -2  -4  649.24   22.21  23 0.88885-0.64422 0.27394-0.39943 0.39044-0.66889
  14   4  -6   54.26   10.10  23 0.88854-0.60568 0.27414-0.02272 0.39102-0.81097
  13   9  -5   21.94    6.40  23 0.88854-0.62492 0.27414 0.29141 0.39102-0.74037
  16  -2  -5   75.45   11.52  23 0.88831-0.56159 0.27429-0.39971 0.39146-0.73892
  -4   6   9   34.97   13.33  23 0.88823-0.95629 0.27434 0.10287 0.39161 0.24859
   0  10   1   66.01    5.79  23 0.88816-0.88660 0.27438 0.35425 0.39176-0.32052
  -4   6   2   -0.97    5.26  23 0.88808-0.96864 0.27443 0.10271 0.39191-0.25150
  32  -6  -5   98.74   24.30  23 0.88800-0.22576 0.27448-0.65091 0.39205-0.73047
  18  -8   0   45.89    8.00  23 0.88792-0.51007 0.27453-0.77700 0.39220-0.38215
  -5   5   8   13.11   11.51  23 0.88785-0.97867 0.27458 0.03971 0.39235 0.17586
   6  -4  11  298.56   19.25  23 0.88769-0.74182 0.27468-0.52647 0.39264 0.39580
   0   0  11  -39.22   15.55  23 0.88715-0.86746 0.27502-0.27529 0.39367 0.39156
  10   4  -5 1169.56   33.68  23 0.88715-0.68638 0.27502-0.02360 0.39367-0.74458
  -3  -1   6 6664.32  171.64  23 0.88715-0.93938 0.27502-0.33805 0.39367 0.03280
  19  -1  -6  169.37   14.70  23 0.88715-0.49936 0.27502-0.33761 0.39367-0.81071
  -5   5   3   23.90    6.95  23 0.88715-0.98687 0.27502 0.03925 0.39367-0.18244
  -3  -1   5  186.19   10.42  23 0.88700-0.94100 0.27512-0.33811 0.39396-0.03888
  22   8  -7   37.30   16.36  23 0.88700-0.43824 0.27512 0.22754 0.39396-0.88076
  31  -7  -4  108.47   21.66  23 0.88684-0.24371 0.27521-0.71448 0.39425-0.66199
  -3   9   8   13.58   14.28  23 0.88684-0.93575 0.27521 0.29073 0.39425 0.17507
   0  12   6    5.78   12.95  23 0.88646-0.87595 0.27546 0.47913 0.39499 0.03314
   0  12   5   12.55   11.27  23 0.88638-0.87766 0.27551 0.47904 0.39513-0.03841
   1  -1  11    0.01   14.38  23 0.88630-0.84553 0.27555-0.33871 0.39528 0.39046
  -2  10   8   17.75   15.10  23 0.88630-0.91419 0.27555 0.35329 0.39528 0.17459
  -4   0   5    6.33    7.96  23 0.88599-0.96105 0.27575-0.27589 0.39586-0.04133
  11   7  -5   72.73    6.95  23 0.88591-0.66423 0.27580 0.16410 0.39601-0.74644
  -3   9   3  884.08   27.84  23 0.88591-0.94372 0.27580 0.29000 0.39601-0.18370
  -5   7   7  117.31   13.11  23 0.88568-0.97836 0.27594 0.16415 0.39645 0.10034
  20   6  -7  -14.75   11.93  23 0.88568-0.47883 0.27594 0.10109 0.39645-0.88430
  -5   3   8   29.83   11.87  23 0.88568-0.97642 0.27594-0.08746 0.39645 0.17174
  -2   8   1  337.58   11.74  23 0.88529-0.92567 0.27619 0.22669 0.39718-0.32703
  -1   1  11    2.15   15.17  23 0.88514-0.88645 0.27628-0.21365 0.39748 0.38721
   6  -6   7   57.02    6.70  23 0.88514-0.74645 0.27628-0.65362 0.39748 0.10530
  -2  10   3  985.67   30.32  23 0.88514-0.92197 0.27628 0.35241 0.39748-0.18462
  32  -8  -3   11.79   20.86  23 0.88498-0.21904 0.27638-0.77850 0.39777-0.59372
  16  -6  -2   89.93    9.80  23 0.88467-0.55242 0.27657-0.65332 0.39835-0.53197
  22  -4  -5  128.04   14.80  23 0.88459-0.43200 0.27662-0.52757 0.39850-0.74252
  -4   8   8    4.07   12.16  23 0.88443-0.95433 0.27672 0.22631 0.39879 0.16997
  -5   7   4  311.98   14.09  23 0.88443-0.98241 0.27672 0.16333 0.39879-0.11620
  -4   2   9   63.87   13.45  23 0.88412-0.95207 0.27691-0.15135 0.39938 0.24079
  25  -3  -6  636.52   27.41  23 0.88389-0.37027 0.27706-0.46520 0.39982-0.81346
   7   3  -4  817.93   24.13  23 0.88373-0.74409 0.27716-0.08857 0.40011-0.68143
  -2   4   0 1072.63   27.97  23 0.88365-0.92573 0.27720-0.02580 0.40025-0.40140
  12   8  -5   44.61    6.89  23 0.88357-0.64092 0.27725 0.22547 0.40040-0.75028
  16  -8   1   59.45    7.23  23 0.88326-0.54554 0.27745-0.78000 0.40098-0.32074
  -6   4   6    6.32    7.96  23 0.88310-0.99842 0.27754-0.02616 0.40128 0.02354
  11  -3  -3  702.85   22.40  23 0.88302-0.65752 0.27759-0.46591 0.40142-0.60912
  19  -3  -5   80.62   11.22  23 0.88294-0.49328 0.27764-0.46582 0.40157-0.74729
  24   0  -7    7.88   13.28  23 0.88294-0.39216 0.27764-0.27739 0.40157-0.88704
  -1  11   8   72.37   15.94  23 0.88287-0.88976 0.27769 0.41407 0.40171 0.16870
   2  -4   8   41.93    8.98  23 0.88287-0.82639 0.27769-0.52936 0.40171 0.17027
   5  -5   9    0.35    8.95  23 0.88279-0.76150 0.27774-0.59232 0.40186 0.24317
  34  -6  -5   65.52   24.94  23 0.88271-0.17856 0.27778-0.65423 0.40201-0.73934
  30  -4  -6   66.19   15.89  23 0.88247-0.26403 0.27793-0.52881 0.40244-0.81326
  -5   3   3 2610.43   68.78  23 0.88247-0.98214 0.27793-0.08941 0.40244-0.19121
  22  -2  -6   95.13   11.53  23 0.88239-0.43166 0.27798-0.40332 0.40259-0.81787
  -2  -2   6  769.62   24.06  23 0.88231-0.91352 0.27802-0.40393 0.40274 0.02428
  -6   4   5  263.80   12.27  23 0.88223-0.99937 0.27807-0.02669 0.40288-0.04946
  20  -6  -3   57.64    9.93  23 0.88216-0.46784 0.27812-0.65477 0.40303-0.60567
   2  -2  11    1.05   11.40  23 0.88208-0.82026 0.27817-0.40421 0.40317 0.38309
  21  -9   1  160.75   11.53  23 0.88200-0.43937 0.27822-0.84352 0.40332-0.32030
  -3  -1   7  336.51   14.27  23 0.88200-0.93241 0.27822-0.34127 0.40332 0.09454
   4  -4  10   30.83   10.93  23 0.88192-0.77986 0.27827-0.53004 0.40347 0.31245
   1  -3   9    7.73    8.59  23 0.88184-0.84462 0.27831-0.46718 0.40361 0.23925
  25  -7  -3   20.93    9.93  23 0.88168-0.36250 0.27841-0.71779 0.40390-0.60374
  -4   0   7   77.36    8.45  23 0.88160-0.95309 0.27846-0.27865 0.40405 0.09326
  20   4  -7   30.42    9.28  23 0.88160-0.47473 0.27846-0.02704 0.40405-0.89184
  20  10  -6   -1.29   12.24  23 0.88160-0.47297 0.27846 0.34987 0.40405-0.82074
  13  -5  -2  239.40   10.39  23 0.88160-0.61232 0.27846-0.59244 0.40405-0.53936
  27  -5  -5   89.09   13.22  24 0.88129-0.32389 0.27865-0.59239 0.40463-0.74590
  -2  -2   5  593.35   18.57  24 0.88113-0.91413 0.27875-0.40462 0.40492-0.04929
   4   4  -3  128.79    6.44  24 0.88113-0.80264 0.27875-0.02734 0.40492-0.61664
   0  12   4   -3.35    9.46  24 0.88113-0.87423 0.27875 0.47577 0.40492-0.11960
  -4   8   3 1504.46   42.53  24 0.88113-0.95994 0.27875 0.22418 0.40492-0.19317
  17  11  -5   38.91    9.86  24 0.88113-0.53361 0.27875 0.41246 0.40492-0.75205
  26  -8  -2  112.58   12.54  24 0.88105-0.33907 0.27880-0.78104 0.40507-0.53311
  -5   1   6  630.66   21.64  24 0.88105-0.97530 0.27880-0.21607 0.40507 0.02030
   5  -1  -2  746.35   21.21  24 0.88081-0.77944 0.27894-0.34170 0.40551-0.54531
  27  -1  -7   81.20   14.35  24 0.88073-0.32703 0.27899-0.34151 0.40565-0.88941
  33  -7  -4   44.16   19.17  24 0.88057-0.19552 0.27908-0.71833 0.40594-0.67255
  -1   5  12    5.05   14.58  24 0.88057-0.88014 0.27908 0.03521 0.40594 0.45021
  -2   2  11   26.61   11.96  24 0.88049-0.90276 0.27913-0.15358 0.40609 0.37802
  18   0  -6  212.62   13.77  24 0.87985-0.51302 0.27952-0.27930 0.40725-0.82482
  17  -7  -1  210.62   11.34  24 0.87985-0.52481 0.27952-0.71912 0.40725-0.46904
  -5   1   5   36.61    8.06  24 0.87977-0.97581 0.27956-0.21682 0.40740-0.05342
  -6   4   7   39.26   10.82  24 0.87946-0.99304 0.27976-0.02837 0.40798 0.08824
  21  -5  -4   97.06   12.66  24 0.87946-0.44602 0.27976-0.59356 0.40798-0.68133
  15   3  -6  292.50   14.92  24 0.87938-0.57553 0.27980-0.09119 0.40813-0.82747
  -1  11   3   60.61    8.52  24 0.87914-0.89501 0.27995 0.41164 0.40856-0.19517
  -6   6   6   71.58   10.85  24 0.87898-0.99438 0.28004 0.09713 0.40885 0.01596
  -5   7   8   29.92   12.59  24 0.87890-0.96969 0.28009 0.16000 0.40900 0.15919
  -4   4  10   34.16   14.36  24 0.87849-0.94468 0.28033-0.02896 0.40972 0.30188
  -2   0  10   29.15   13.52  24 0.87849-0.90254 0.28033-0.28057 0.40972 0.30293
   8  -4  -1 2648.82   68.91  24 0.87825-0.71208 0.28047-0.53172 0.41016-0.47698
  26  -6  -4   66.50   15.97  24 0.87785-0.33958 0.28071-0.65729 0.41089-0.68146
  -1  -1  10   63.00   14.02  24 0.87777-0.88084 0.28076-0.34391 0.41103 0.30218
  23   1  -7  271.04   18.74  24 0.87777-0.40795 0.28076-0.21771 0.41103-0.89704
  -5   5   9   63.44   13.81  24 0.87769-0.96667 0.28081 0.03348 0.41118 0.22843
  -6   6   5   57.22    9.65  24 0.87769-0.99484 0.28081 0.09636 0.41118-0.05776
  29  -9  -1    2.78   15.52  24 0.87761-0.27087 0.28086-0.84588 0.41132-0.46640
  -3  -1   4  544.42   17.75  24 0.87753-0.93331 0.28090-0.34387 0.41147-0.12776
  -3   9   9  711.70   31.98  24 0.87737-0.92447 0.28100 0.28496 0.41176 0.22898
  -2  -2   7   59.25    9.25  24 0.87737-0.90676 0.28100-0.40693 0.41176 0.08664
  15  -1  -5 1483.44   43.56  24 0.87737-0.57165 0.28100-0.34363 0.41176-0.75978
   1  11   1   26.38    5.16  24 0.87721-0.85466 0.28109 0.41041 0.41205-0.34027
  -4   0   4  822.07   24.76  24 0.87713-0.95397 0.28114-0.28126 0.41219-0.12904
  -5   1   7  317.40   16.00  24 0.87713-0.96963 0.28114-0.21844 0.41219 0.08457
  11  -1  -4  417.98   16.51  24 0.87713-0.65350 0.28114-0.34382 0.41219-0.69121
  22  -8  -1  128.36   11.90  24 0.87705-0.41711 0.28119-0.78352 0.41234-0.47132
   7   5  -4 1980.05   52.36  24 0.87705-0.73744 0.28119 0.03305 0.41234-0.69368
  14  -8   9  -25.25    8.80  24 0.87705-0.56672 0.28119-0.78427 0.41234 0.23758
  15  -3  -4  285.18   14.52  24 0.87681-0.56924 0.28133-0.46961 0.41277-0.68953
  21   3  -7   58.99   13.75  24 0.87664-0.44878 0.28143-0.09280 0.41306-0.90025
  32  -4  -6   78.36   24.77  24 0.87608-0.21571 0.28176-0.53262 0.41408-0.82377
  -6   6   7  358.43   18.49  24 0.87600-0.98957 0.28181 0.09537 0.41422 0.08199
   3   1  -2 1940.10   50.22  24 0.87592-0.81656 0.28186-0.21896 0.41437-0.55532
  -3   1  10   36.31   13.68  24 0.87592-0.92102 0.28186-0.21921 0.41437 0.29775
  -4   6  10   -5.97   14.95  24 0.87575-0.94203 0.28195 0.09526 0.41466 0.29697
   3  -5   6   17.43    5.11  24 0.87575-0.80187 0.28195-0.59640 0.41466 0.01509
  35  -7  -4   63.90   29.96  24 0.87575-0.14879 0.28195-0.72123 0.41466-0.68019
  17   1  -6  450.18   19.82  24 0.87567-0.52982 0.28200-0.21898 0.41480-0.83294
   6  -4   0  451.11   13.28  24 0.87567-0.74965 0.28200-0.53330 0.41480-0.41143
  22   2  -7  187.47   16.76  24 0.87551-0.42666 0.28209-0.15626 0.41509-0.90167
  15   5  -6   18.71    9.46  24 0.87543-0.57159 0.28214 0.03209 0.41524-0.83459
  16   2  -6   91.53   11.55  24 0.87527-0.55040 0.28224-0.15642 0.41553-0.83424
  -5   3   9  122.43   15.29  24 0.87502-0.96395 0.28238-0.09391 0.41596 0.22363
  -4   8   9  261.26   20.15  24 0.87502-0.94304 0.28238 0.22064 0.41596 0.22420
  21  -7  -2  516.31   20.72  24 0.87486-0.43776 0.28247-0.72199 0.41625-0.54709
  -4   2   2  984.48   27.48  24 0.87470-0.95513 0.28257-0.15691 0.41654-0.27611
  -6   4   4   85.19    9.22  24 0.87470-0.99360 0.28257-0.03118 0.41654-0.13450
  18  -4  -4   51.75   11.62  24 0.87445-0.50395 0.28271-0.53376 0.41697-0.69203
  12  -8   7   99.89    6.35  24 0.87421-0.60952 0.28285-0.78584 0.41741 0.08865
  17  -5  -3   67.31   10.63  24 0.87388-0.52250 0.28304-0.59692 0.41799-0.62231
  27  -3  -6  184.05   19.93  24 0.87380-0.31826 0.28309-0.47121 0.41813-0.83065
   3  -3  11   86.59   15.28  24 0.87372-0.79090 0.28314-0.47209 0.41828 0.36853
  13  11  -4   25.20    5.47  24 0.87364-0.60823 0.28318 0.40808 0.41842-0.69652
   0  -2  10  100.02   14.02  24 0.87339-0.85540 0.28332-0.40935 0.41885 0.29488
  21   5  -7   41.58   13.59  24 0.87339-0.44555 0.28332 0.03091 0.41885-0.90608
  -4   0   8   24.16   10.99  24 0.87331-0.94295 0.28337-0.28357 0.41900 0.14971
  11   3  -5  201.82   10.85  24 0.87314-0.65137 0.28347-0.09487 0.41929-0.76960
  14  -4  -3   85.94    9.82  24 0.87314-0.58471 0.28347-0.53457 0.41929-0.62530
  -3  -1   8   77.33   11.49  24 0.87306-0.92173 0.28351-0.34662 0.41943 0.14983
  -6   4   8   14.26   11.81  24 0.87257-0.98436 0.28380-0.03242 0.42030 0.14733
  10  -6  11   20.51   13.79  24 0.87241-0.64248 0.28389-0.66143 0.42059 0.36999
  25  -9   0  108.71   12.34  24 0.87241-0.34772 0.28389-0.84909 0.42059-0.40664
  29  -5  -5  112.94   19.48  24 0.87241-0.27309 0.28389-0.59761 0.42059-0.76073
  29  -1  -7  100.02   23.55  24 0.87232-0.27669 0.28394-0.34642 0.42073-0.90328
   4   0  -2 1168.26   31.48  24 0.87232-0.79196 0.28394-0.28388 0.42073-0.56111
   3  -5   5  216.62    8.36  24 0.87216-0.80008 0.28403-0.59844 0.42102-0.06264
  -6   2   6  221.40   13.17  24 0.87158-0.98690 0.28436-0.15877 0.42203 0.00277
  24  -4  -5  -16.80   14.36  24 0.87133-0.37686 0.28450-0.53548 0.42246-0.76541
  21  -1  -6   36.65   13.21  24 0.87117-0.44146 0.28460-0.34718 0.42275-0.83867
   9  -7   8   13.60    6.56  24 0.87100-0.66748 0.28469-0.72490 0.42304 0.15275
   8   2  -4  829.08   25.00  24 0.87067-0.71001 0.28488-0.15911 0.42362-0.70433
  -4   2  10   44.82   14.93  24 0.87042-0.93655 0.28502-0.15947 0.42405 0.28752
   6  -6   8  191.55   11.01  24 0.87026-0.72975 0.28512-0.66250 0.42434 0.14982
  -5   7   3  221.28   11.22  24 0.87009-0.96987 0.28521 0.15482 0.42462-0.21343
  -5   1   4 2444.70   65.30  24 0.87009-0.96793 0.28521-0.22245 0.42462-0.14203
  -1  -3   6  110.65    8.53  24 0.86993-0.88011 0.28530-0.47408 0.42491 0.00264
   4  12   0   81.46    5.68  24 0.86993-0.78620 0.28530 0.46902 0.42491-0.42282
   3  -5   7  112.18    8.66  24 0.86993-0.79424 0.28530-0.59980 0.42491 0.07621
  -6   6   4  549.51   19.68  24 0.86993-0.98887 0.28530 0.09185 0.42491-0.14289
   2  -4   3  879.89   23.28  24 0.86984-0.82238 0.28535-0.53682 0.42506-0.20993
  27  -7  -3   49.37   14.72  24 0.86976-0.30865 0.28540-0.72474 0.42520-0.62389
  19   9  -6   35.60   10.87  24 0.86968-0.48200 0.28544 0.28006 0.42534-0.84254
  -6   6   8  -16.42   12.05  24 0.86968-0.98150 0.28544 0.09174 0.42534 0.14229
   7  -5  11  123.23   15.56  24 0.86968-0.70275 0.28544-0.60010 0.42534 0.36359
  -5   1   8  106.54   13.21  24 0.86960-0.96030 0.28549-0.22281 0.42549 0.14267
  24  -2  -6  202.62   18.00  24 0.86960-0.37697 0.28549-0.41085 0.42549-0.83970
  -5   7   9   13.74   14.09  24 0.86951-0.95860 0.28554 0.15458 0.42563 0.21399
  14   0  -5   67.98   10.39  24 0.86935-0.58460 0.28563-0.28545 0.42592-0.77449
  28  -8  -2  -25.88   14.59  24 0.86926-0.28536 0.28568-0.78790 0.42606-0.55298
  10   0  -4 1413.19   40.03  24 0.86918-0.66655 0.28572-0.28560 0.42621-0.70579
  -3   7   1   38.78    4.79  24 0.86901-0.93036 0.28582 0.15418 0.42650-0.35690
  -6   2   7  290.87   15.89  24 0.86893-0.98246 0.28587-0.16028 0.42664 0.06956
  -6   2   5   84.24    9.60  24 0.86885-0.98592 0.28591-0.16030 0.42678-0.07337
  22   6  -7   -8.71   13.90  24 0.86876-0.41998 0.28596 0.09108 0.42693-0.91363
   3  -1  -1  421.94   16.23  24 0.86868-0.80748 0.28601-0.34880 0.42707-0.49670
  -2  -2   4  116.02    7.87  24 0.86860-0.90338 0.28605-0.41189 0.42721-0.14296
  -2  -2   8   51.14   10.40  24 0.86835-0.89593 0.28619-0.41215 0.42765 0.14214
  23   7  -7   18.14   15.98  24 0.86793-0.39817 0.28643 0.15342 0.42836-0.91450
   8  -6  10   -3.49    9.84  24 0.86776-0.68164 0.28652-0.66401 0.42865 0.28940
   0  12   3   24.38    8.23  24 0.86776-0.86261 0.28652 0.46794 0.42865-0.21472
  18  -2  -5   63.32   11.70  24 0.86759-0.49893 0.28661-0.41201 0.42894-0.77524
  28  -6  -4  113.69   16.45  24 0.86759-0.28739 0.28661-0.66317 0.42894-0.69838
   2  -4   9    0.06    9.60  24 0.86734-0.80911 0.28675-0.53851 0.42937 0.21402
  11   5  -5   41.46    7.68  24 0.86726-0.64553 0.28680 0.02744 0.42951-0.77987
  14  -6  -1  247.58   11.22  24 0.86709-0.57501 0.28689-0.66372 0.42980-0.49326
  16   6  -6   69.99    9.71  24 0.86650-0.54173 0.28722 0.08983 0.43080-0.84963
   9   1  -4  251.61   10.98  24 0.86642-0.68476 0.28727-0.22431 0.43095-0.71108
  -1  -3   7  178.03   10.75  24 0.86633-0.87469 0.28731-0.47611 0.43109 0.06784
  -4  10   6  938.35   32.22  24 0.86625-0.93971 0.28736 0.34142 0.43123-0.00534
  12   2  -5  603.71   20.17  24 0.86625-0.62351 0.28736-0.16157 0.43123-0.78099
  21  -3  -5  274.00   16.97  24 0.86617-0.43457 0.28740-0.47557 0.43138-0.77595
  -5   9   6   41.42   10.65  24 0.86583-0.96032 0.28759 0.27830 0.43195-0.00661
  25   1  -7   56.80   12.09  24 0.86583-0.35408 0.28759-0.22453 0.43195-0.91682
  -2   6   0  376.09   11.26  24 0.86566-0.90778 0.28768 0.08944 0.43224-0.43341
  -1  -3   5  571.40   18.03  24 0.86566-0.87762 0.28768-0.47641 0.43224-0.07607
   1  -1  12  161.05   16.12  24 0.86566-0.82306 0.28768-0.35087 0.43224 0.42491
  -5   5  10  -12.84   10.55  24 0.86532-0.95254 0.28787 0.02641 0.43281 0.27823
  13   1  -5  411.80   15.75  24 0.86532-0.60159 0.28787-0.22489 0.43281-0.78198
  29  -3  -6   60.93   14.73  24 0.86515-0.26768 0.28796-0.47604 0.43310-0.84442
  31  -5  -5   86.98   15.75  25 0.86498-0.22373 0.28806-0.60171 0.43338-0.77234
  -4  10   7  175.70   14.24  25 0.86448-0.93616 0.28833 0.34048 0.43424 0.06306
   1  -3  10   44.19   11.22  25 0.86439-0.82537 0.28838-0.47730 0.43439 0.27987
  22  -6  -3  797.23   27.14  25 0.86439-0.40815 0.28838-0.66501 0.43439-0.63590
  11  -5  -1 3231.45   84.08  25 0.86422-0.63509 0.28847-0.60252 0.43467-0.49981
  -5   9   7   32.06   11.57  25 0.86414-0.95681 0.28852 0.27738 0.43482 0.06194
  11  -7  10   10.14   10.82  25 0.86414-0.61497 0.28852-0.72882 0.43482 0.28486
  23  -5  -4   97.48   12.00  25 0.86405-0.38868 0.28857-0.60234 0.43496-0.70716
   5   7  -3  247.64    7.91  25 0.86388-0.76447 0.28866 0.15128 0.43525-0.64645
  -4  10   5   72.40   10.72  25 0.86346-0.93875 0.28889 0.33988 0.43596-0.08147
  18   8  -6   41.79   10.06  25 0.86329-0.49658 0.28898 0.21371 0.43625-0.85398
  -7   5   6   87.04   10.35  25 0.86320-0.99958 0.28903 0.02524 0.43639-0.01214
  11  -7   2   49.26    3.84  25 0.86303-0.62841 0.28912-0.72895 0.43667-0.28788
  -6   4   9   54.41   12.50  25 0.86303-0.97295 0.28912-0.03775 0.43667 0.20235
  -5   9   5   16.28    8.88  25 0.86295-0.95922 0.28917 0.27670 0.43682-0.08288
  10  -2  -3  425.34   15.93  25 0.86295-0.65846 0.28917-0.41468 0.43682-0.64509
  -3  11   6   20.06   11.99  25 0.86286-0.91533 0.28921 0.40247 0.43696-0.01052
  28   0  -7  -10.39   18.20  25 0.86286-0.28823 0.28921-0.28894 0.43696-0.92016
  16   4  -6   48.91   10.29  25 0.86278-0.53799 0.28926-0.03783 0.43710-0.85590
  -6   2   8  139.35   13.66  25 0.86244-0.97415 0.28944-0.16387 0.43767 0.12993
  24   2  -7  222.95   18.72  25 0.86235-0.37159 0.28949-0.16364 0.43782-0.92328
  17   7  -6   17.92    9.17  25 0.86227-0.51651 0.28954 0.15033 0.43796-0.85621
   5  -5  10   61.92   10.89  25 0.86218-0.73908 0.28958-0.60423 0.43810 0.27832
  23   3  -7   82.30   15.51  25 0.86210-0.39229 0.28963-0.10099 0.43825-0.92424
  -5   3  10   51.56   14.75  25 0.86210-0.94927 0.28963-0.10118 0.43825 0.27278
  -4   0   9  607.82   27.69  25 0.86210-0.92994 0.28963-0.28986 0.43825 0.20186
  -3   9   2   84.74    7.67  25 0.86175-0.92133 0.28981 0.27596 0.43882-0.29789
  -7   5   7  952.94   32.60  25 0.86167-0.99627 0.28986 0.02442 0.43896 0.05669
  -6   8   6   30.89   11.18  25 0.86158-0.97697 0.28990 0.21306 0.43910-0.01431
  -3  11   7    0.84   13.16  25 0.86141-0.91206 0.29000 0.40171 0.43939 0.05846
  -2  10   2   91.00    7.86  25 0.86133-0.89996 0.29004 0.33862 0.43953-0.29807
  -3  -1   9 1412.85   44.01  25 0.86133-0.90812 0.29004-0.35315 0.43953 0.20112
  -2   0  11    2.53   15.07  25 0.86124-0.88347 0.29009-0.29036 0.43967 0.34439
  -6   6   9   26.69   13.60  25 0.86072-0.97071 0.29036 0.08682 0.44053 0.19851
   9  -3  -2 1066.33   30.59  25 0.86038-0.67506 0.29055-0.47893 0.44110-0.57865
  -6   8   7   61.70   12.91  25 0.86021-0.97388 0.29064 0.21236 0.44138 0.05482
  16  10  -5  229.92   12.20  25 0.86021-0.53366 0.29064 0.33774 0.44138-0.78903
   4  -4  11   80.80   14.90  25 0.86012-0.75626 0.29069-0.54252 0.44153 0.34579
  29  -7  -3  135.69   16.92  25 0.85978-0.25675 0.29087-0.73020 0.44210-0.63967
  -1  -1  11   43.18   15.29  25 0.85978-0.86099 0.29087-0.35404 0.44210 0.34251
  -3  11   5   26.62   11.37  25 0.85978-0.91400 0.29087 0.40076 0.44210-0.08705
  26  -4  -5  162.98   18.07  25 0.85969-0.32328 0.29091-0.54184 0.44224-0.78402
  -7   5   5   10.46    8.79  25 0.85952-0.99771 0.29101 0.02326 0.44252-0.08968
  30  -8  -2  -30.48   16.93  25 0.85952-0.23368 0.29101-0.79318 0.44252-0.56829
  -3   1  11   22.73   15.74  25 0.85943-0.90270 0.29105-0.22842 0.44266 0.34086
  -4  10   8   -4.21   14.97  25 0.85935-0.92917 0.29110 0.33772 0.44281 0.12591
  22  10  -6   22.84   15.56  25 0.85917-0.40858 0.29119 0.33711 0.44309-0.85859
  -5   1   9  928.33   33.79  25 0.85917-0.94804 0.29119-0.22853 0.44309 0.19647
  33  -5  -5  171.44   23.99  25 0.85917-0.17602 0.29119-0.60487 0.44309-0.78097
  30  -6  -4  137.14   19.31  25 0.85900-0.23686 0.29128-0.66777 0.44338-0.71164
  -5   9   8   29.96   14.71  25 0.85900-0.94983 0.29128 0.27463 0.44338 0.12479
  20  -8   0  328.35   14.42  25 0.85900-0.43920 0.29128-0.79372 0.44338-0.43219
   3  -5   8  162.23   10.88  25 0.85892-0.78140 0.29133-0.60586 0.44352 0.12899
  14  -2  -4  296.25   14.73  25 0.85883-0.57226 0.29137-0.41684 0.44366-0.72097
  24  -8  -1   91.54   12.50  25 0.85866-0.35678 0.29146-0.79375 0.44395-0.50179
  -5   5   2  211.71    9.71  25 0.85831-0.95984 0.29165 0.02262 0.44451-0.30468
  26  -2  -6  192.55   18.65  25 0.85831-0.32373 0.29165-0.41695 0.44451-0.85751
  -7   3   6  160.82   12.62  25 0.85831-0.99465 0.29165-0.10317 0.44451-0.02027
  18  -6  -2  361.95   15.99  25 0.85814-0.48395 0.29174-0.66844 0.44480-0.57726
  31  -3  -6   75.73   22.15  25 0.85805-0.21866 0.29178-0.47983 0.44494-0.85511
  -6   8   5   74.78   10.79  25 0.85796-0.97521 0.29183 0.21113 0.44508-0.09170
  -5   7  10   11.10   15.41  25 0.85796-0.94522 0.29183 0.14829 0.44508 0.26596
  23   5  -7   81.57   15.54  25 0.85796-0.38819 0.29183 0.02241 0.44508-0.93115
  -1  -3   8  102.05   10.87  25 0.85779-0.86434 0.29192-0.48076 0.44537 0.12495
  -6   2   4 2351.90   63.41  25 0.85744-0.97628 0.29210-0.16648 0.44593-0.16390
  -7   3   7  135.53   13.22  25 0.85718-0.99175 0.29224-0.10377 0.44636 0.04928
   2  12   1   20.88    5.43  25 0.85710-0.81355 0.29229 0.46208 0.44650-0.37418
  23  -1  -6  176.34   16.56  25 0.85683-0.38517 0.29242-0.35496 0.44693-0.86164
  23  -7  -2   65.50   11.83  25 0.85675-0.37771 0.29247-0.73196 0.44707-0.57677
  27  -9   0   83.82   13.82  25 0.85666-0.29003 0.29251-0.85764 0.44721-0.43211
  -3  11   8   -0.85   16.02  25 0.85640-0.90530 0.29265 0.39911 0.44764 0.12163
  13  -7   1 1490.85   39.96  25 0.85640-0.58164 0.29265-0.73241 0.44764-0.36905
  -7   5   8    4.40   11.28  25 0.85640-0.98914 0.29265 0.02162 0.44764 0.11941
  -2  -2   9   67.47   12.71  25 0.85614-0.88194 0.29279-0.41880 0.44806 0.19313
  19   1  -6  164.55   14.11  25 0.85614-0.46839 0.29279-0.22977 0.44806-0.86509
  23  -9   1   23.38    9.36  25 0.85596-0.37138 0.29288-0.85811 0.44835-0.36418
  17   3  -6    3.83   10.15  25 0.85570-0.50990 0.29301-0.10439 0.44877-0.86693
  -2  12   6    8.68   13.21  25 0.85561-0.88712 0.29306 0.46154 0.44891-0.02193
  27   1  -7   26.78   18.21  25 0.85553-0.30186 0.29311-0.23003 0.44906-0.93277
  -6   4   3  955.76   28.35  25 0.85544-0.97614 0.29315-0.04177 0.44920-0.23855
  -6   8   8  -22.38   13.57  25 0.85535-0.96714 0.29320 0.20979 0.44934 0.11827
  20  -4  -4  270.34   16.43  25 0.85491-0.44247 0.29342-0.54444 0.45005-0.72394
  35  -5  -5  -22.50   41.76  25 0.85474-0.12966 0.29351-0.60715 0.45033-0.78706
  -4   2  11   -9.60   16.05  25 0.85465-0.91898 0.29356-0.16803 0.45047 0.33252
  -4   8   2  225.67   10.55  25 0.85456-0.93514 0.29360 0.20929 0.45061-0.31024
   0  -2  11   91.17   15.66  25 0.85456-0.83474 0.29360-0.41967 0.45061 0.33452
  -4  10   4  243.79   13.72  25 0.85421-0.93122 0.29379 0.33492 0.45118-0.16808
  17  -1  -5  475.30   20.44  25 0.85412-0.50644 0.29383-0.35642 0.45132-0.79815
  -1  11   2   77.27    7.68  25 0.85395-0.87156 0.29392 0.39761 0.45160-0.30959
  12  -8   8  -60.55   10.95  25 0.85377-0.58724 0.29401-0.79704 0.45189 0.12553
  18   2  -6  139.41   13.27  25 0.85377-0.48701 0.29401-0.16820 0.45189-0.86950
  -7   3   5 1005.44   31.20  25 0.85360-0.99170 0.29410-0.10561 0.45217-0.09933
  -5   9   4   38.66    9.27  25 0.85342-0.95141 0.29419 0.27162 0.45245-0.16990
  -7   7   6  101.49   12.03  25 0.85289-0.98934 0.29446 0.14561 0.45330-0.02907
  -6   2   9  129.79   15.04  25 0.85289-0.96279 0.29446-0.16891 0.45330 0.18571
  -7   7   7    0.27   11.55  25 0.85245-0.98707 0.29469 0.14539 0.45401 0.04163
  17  -3  -4  304.94   15.50  25 0.85236-0.50286 0.29473-0.48298 0.45415-0.72975
   6  -6   9   14.16    9.22  25 0.85227-0.70996 0.29478-0.67224 0.45429 0.19125
  12   6  -5  128.17    9.17  25 0.85218-0.60948 0.29482 0.08224 0.45443-0.80421
  32  -6  -4  260.40   24.16  25 0.85218-0.18813 0.29482-0.67131 0.45443-0.72159
  19  -7  -1   71.73    9.99  25 0.85210-0.45511 0.29487-0.73443 0.45457-0.51521
  -7   3   8  187.24   15.65  25 0.85192-0.98469 0.29496-0.10650 0.45486 0.11219
  32  -8  -2   14.06   19.78  25 0.85183-0.18407 0.29501-0.79716 0.45500-0.57965
   8   6  -4  425.88   13.89  25 0.85183-0.69126 0.29501 0.08208 0.45500-0.73578
  24   4  -7   43.18   15.02  25 0.85165-0.36090 0.29510-0.04365 0.45528-0.94071
  31  -7  -3   12.15   17.55  25 0.85165-0.20669 0.29510-0.73437 0.45528-0.65170
  -2  12   5   21.23   12.21  25 0.85165-0.88490 0.29510 0.45944 0.45528-0.09970
  -6   6   3  901.89   27.27  25 0.85139-0.97212 0.29523 0.08191 0.45570-0.24506
  -4  10   9  386.00   24.70  25 0.85130-0.91939 0.29528 0.33359 0.45584 0.18430
  23  -3  -5   91.16   39.86  25 0.85130-0.37779 0.29528-0.48342 0.45584-0.79929
  19  -5  -3  301.18   15.85  25 0.85112-0.45780 0.29537-0.60920 0.45613-0.65929
  -6   4  10   55.28   15.68  25 0.85103-0.95917 0.29541-0.04405 0.45627 0.25418
  -4   0   3   65.36    7.12  25 0.85094-0.92956 0.29546-0.29555 0.45641-0.24463
  -5   9   9  101.34   19.89  25 0.85094-0.94002 0.29546 0.27048 0.45641 0.18319
  25  -5  -4  491.17   23.10  25 0.85068-0.33338 0.29559-0.60934 0.45683-0.72790
  12  -6   0   49.85    5.66  25 0.85014-0.59819 0.29586-0.67274 0.45768-0.45093
   9  -7   9    7.80    8.69  25 0.84988-0.64454 0.29599-0.73629 0.45810 0.18908
  -3  11   4    3.47    8.53  25 0.84988-0.90595 0.29599 0.39563 0.45810-0.17446
  28  -4  -5   91.93   17.01  25 0.84988-0.27154 0.29599-0.54691 0.45810-0.79876
  17   5  -6  294.03   15.27  25 0.84988-0.50413 0.29599 0.01825 0.45810-0.87634
  25   3  -7   98.63   15.94  25 0.84952-0.33781 0.29617-0.10753 0.45866-0.94357
   2  -4  10   61.58   11.94  25 0.84943-0.78936 0.29622-0.54802 0.45880 0.25598
  -6   6  10   32.88   14.00  25 0.84934-0.95755 0.29626 0.08093 0.45894 0.25152
  24  -6  -3 1161.51   36.99  25 0.84890-0.35073 0.29649-0.67311 0.45965-0.66004
  20  -2  -5   65.20    9.90  25 0.84881-0.43820 0.29653-0.42190 0.45979-0.80491
  28  -2  -6   -3.13   12.29  25 0.84881-0.27231 0.29653-0.42182 0.45979-0.87165
  12   4  -5  223.78   11.18  25 0.84863-0.60592 0.29662-0.04520 0.46007-0.80983
   9  -5   0  130.76    7.05  25 0.84845-0.65947 0.29671-0.61081 0.46035-0.45530
  -4   0  10   13.29   10.02  25 0.84836-0.91440 0.29675-0.29701 0.46049 0.25103
  -7   7   5   25.40    7.10  25 0.84809-0.98627 0.29689 0.14316 0.46091-0.10808
  -7   7   8    3.67    8.97  25 0.84809-0.98087 0.29689 0.14319 0.46091 0.10613
  -7   5   4 2051.45   56.27  25 0.84800-0.98795 0.29693 0.01733 0.46105-0.17960
  -7   5   9   89.27   11.80  25 0.84800-0.97900 0.29693 0.01734 0.46105 0.17742
  -3  -1   319674.30  494.15  26 0.84764-0.90522 0.29711-0.36006 0.46162-0.24928
  15  -5  -2   50.27    6.43  26 0.84746-0.53622 0.29720-0.61114 0.46190-0.59605
  -6   8   9   97.26   13.08  26 0.84746-0.95746 0.29720 0.20581 0.46190 0.17713
  -6   8   4   -8.82    6.77  26 0.84728-0.96628 0.29729 0.20564 0.46218-0.18018
  -5   3  11   -5.43   11.38  26 0.84710-0.93244 0.29738-0.10894 0.46246 0.31998
  15   9  -5  143.18    9.98  26 0.84701-0.54142 0.29742 0.26812 0.46260-0.81075
  34  -6  -4   55.46   17.54  26 0.84692-0.14094 0.29747-0.67388 0.46274-0.72871
  -3  -1  10   45.80   10.15  26 0.84692-0.89194 0.29747-0.36062 0.46274 0.24932
  13  -3  -3  154.56    9.18  26 0.84692-0.57950 0.29747-0.48578 0.46274-0.66931
   8   4  -4 1461.19   39.89  26 0.84683-0.68623 0.29751-0.04609 0.46288-0.74363
  21   9  -6    4.97   11.92  26 0.84674-0.41713 0.29756 0.26794 0.46302-0.87907
  -5   3   2 2138.87   56.19  26 0.84665-0.94813 0.29760-0.10909 0.46316-0.32331
  19  11  -5   20.08   11.09  26 0.84647-0.45699 0.29769 0.39349 0.46344-0.80939
  12  -4  -2  494.92   16.93  26 0.84638-0.59809 0.29774-0.54889 0.46358-0.59942
  22   0  -6   90.22   11.41  26 0.84638-0.39573 0.29774-0.29750 0.46358-0.87891
   0  -4   6  182.06    9.47  26 0.84638-0.83549 0.29774-0.54934 0.46358-0.03550
   0  -4   7   16.22    7.20  26 0.84620-0.83352 0.29783-0.54949 0.46386 0.03560
  -5   1  10   70.91   13.29  26 0.84620-0.93323 0.29783-0.23518 0.46386 0.24710
  12  10  -4   30.52    5.92  26 0.84602-0.60157 0.29791 0.33050 0.46414-0.74274
  -1  -3   9   67.41   11.21  26 0.84566-0.85038 0.29809-0.48696 0.46470 0.17701
  33  -7  -3   32.66   18.72  26 0.84539-0.15851 0.29822-0.73748 0.46512-0.66042
   5   3  -3 2857.16   73.68  26 0.84539-0.74591 0.29822-0.10965 0.46512-0.67626
   9  -1  -3  324.86   13.17  26 0.84521-0.66171 0.29831-0.36101 0.46540-0.67422
  -1  -3   4   64.55    6.06  26 0.84521-0.85896 0.29831-0.48700 0.46540-0.18060
   1  -3  11   18.60   13.25  26 0.84476-0.80390 0.29854-0.48749 0.46610 0.31956
  25  -1  -6   26.78   14.44  26 0.84448-0.33092 0.29867-0.36122 0.46652-0.88015
  16  -4  -3  303.70   14.67  26 0.84430-0.51393 0.29876-0.54984 0.46680-0.67167
  -5   1   3   36.75    6.87  26 0.84430-0.94391 0.29876-0.23598 0.46680-0.25559
   3  -5   9   31.35    9.33  26 0.84412-0.76480 0.29885-0.61344 0.46708 0.17681
  -4   4   1 1799.30   47.12  26 0.84376-0.92602 0.29902-0.04763 0.46764-0.39858
  16   0  -5   65.06   11.62  26 0.84349-0.51680 0.29916-0.29895 0.46806-0.81547
  -7   3   9   38.59   13.25  26 0.84340-0.97436 0.29920-0.11075 0.46820 0.17026
  13   7  -5  107.26    8.92  26 0.84340-0.57975 0.29920 0.14070 0.46820-0.81746
  36  -6  -4   75.01   29.11  26 0.84330-0.09541 0.29924-0.67568 0.46834-0.73324
   3  -5   4   23.66    3.23  26 0.84321-0.77293 0.29929-0.61364 0.46848-0.18147
  26  -8  -1   23.72   12.35  26 0.84321-0.29941 0.29929-0.80156 0.46848-0.52520
  13  -1  -4   92.04    9.99  26 0.84303-0.57746 0.29938-0.36203 0.46876-0.74662
   8  -6  11    3.50   12.91  26 0.84212-0.65416 0.29982-0.67736 0.47016 0.31929
  21  -9   2    9.66    7.83  26 0.84212-0.39767 0.29982-0.86517 0.47016-0.31582
  -8   4   7  323.85   18.00  26 0.84203-0.99753 0.29986-0.04849 0.47030 0.02477
  30  -4  -5  254.22   22.43  26 0.84175-0.22148 0.29999-0.55086 0.47072-0.81020
  18  -8   1  675.47   21.37  26 0.84166-0.46198 0.30004-0.80253 0.47086-0.38947
  14   8  -5   15.35    6.77  26 0.84148-0.55685 0.30013 0.20259 0.47114-0.81983
  18   6  -6   42.00   10.69  26 0.84139-0.47466 0.30017 0.07689 0.47128-0.88893
  28   2  -7  105.35   20.75  26 0.84130-0.26668 0.30021-0.17434 0.47141-0.95454
  -2  -2  10   36.06   12.76  26 0.84130-0.86525 0.30021-0.42625 0.47141 0.24117
  -8   4   6  207.68   13.87  26 0.84120-0.99857 0.30026-0.04889 0.47155-0.04788
  25  -7  -2  140.34   14.78  26 0.84120-0.32021 0.30026-0.73967 0.47155-0.60008
   1  -3   2 1621.68   41.25  26 0.84111-0.81646 0.30030-0.48889 0.47169-0.32847
  30  -2  -6   38.98   19.65  26 0.84102-0.22262 0.30035-0.42564 0.47183-0.88261
  35  -7  -3    4.51   23.93  26 0.84084-0.11204 0.30043-0.73967 0.47211-0.66629
  -6   2  10   52.97   15.08  26 0.84066-0.94880 0.30052-0.17499 0.47239 0.23805
  -7   7   9    1.65   14.37  26 0.84056-0.97154 0.30057 0.13952 0.47253 0.16593
  -2  12   4   27.43   10.46  26 0.84047-0.87553 0.30061 0.45389 0.47267-0.18849
  -8   6   7   76.70   12.38  26 0.84029-0.99591 0.30070 0.07647 0.47295 0.02212
  26   4  -7  317.40   23.38  26 0.83974-0.30707 0.30096-0.04951 0.47378-0.95811
  -7   3   4  864.31   27.03  26 0.83964-0.97954 0.30100-0.11251 0.47392-0.19247
  18   4  -6  154.62   12.85  26 0.83937-0.47261 0.30114-0.04970 0.47434-0.89194
  27  -5  -4  226.25   18.63  26 0.83937-0.28015 0.30114-0.61486 0.47434-0.74428
   0  -4   8  111.64   10.84  26 0.83937-0.82487 0.30114-0.55284 0.47434 0.09651
   5  -5  11  268.03   17.68  26 0.83937-0.71441 0.30114-0.61580 0.47434 0.31346
   0  12   2   62.00    7.66  26 0.83900-0.83562 0.30131 0.45309 0.47490-0.33234
  -6   0   7   36.77   10.46  26 0.83891-0.95234 0.30135-0.30155 0.47504 0.02113
  -5   7   2  132.82    7.86  26 0.83872-0.94026 0.30144 0.13857 0.47531-0.33549
  21   1  -6   62.53   13.52  26 0.83863-0.40892 0.30149-0.23843 0.47545-0.89127
  -4   6   1 3423.22   88.10  26 0.83845-0.92077 0.30157 0.07555 0.47573-0.40670
  25  -3  -5  411.50   21.93  26 0.83845-0.32301 0.30157-0.48969 0.47573-0.81803
  -8   4   8   30.41   12.22  26 0.83817-0.99193 0.30170-0.05034 0.47615 0.09033
  13   3  -5   39.11    8.68  26 0.83798-0.57426 0.30179-0.11317 0.47643-0.82557
  19   7  -6  180.76   13.52  26 0.83789-0.45020 0.30183 0.13803 0.47657-0.89367
  22  -4  -4  168.34   15.19  26 0.83771-0.38334 0.30192-0.55291 0.47684-0.74960
  -6   0   6  -13.02    9.08  26 0.83761-0.95287 0.30197-0.30215 0.47698-0.05221
  -5  -1   7  270.53   14.47  26 0.83752-0.92993 0.30201-0.36509 0.47712 0.01959
  -7   5  10   31.55   15.11  26 0.83706-0.96622 0.30223 0.01204 0.47782 0.23207
  -8   6   8   30.28   12.67  26 0.83687-0.99062 0.30231 0.07485 0.47809 0.08839
  15   1  -5 1549.84   44.85  26 0.83659-0.53091 0.30244-0.23945 0.47851-0.82651
   4  -4  12   39.83   16.70  26 0.83613-0.73040 0.30266-0.55453 0.47920 0.37950
  -5  -1   6  599.50   21.22  26 0.83604-0.93024 0.30271-0.36576 0.47934-0.05402
  26  -6  -3  -13.64   13.56  26 0.83566-0.29555 0.30288-0.67942 0.47990-0.67910
  32  -4  -5   75.13   20.65  26 0.83539-0.17320 0.30301-0.55385 0.48031-0.81866
  -7   1   7  342.74   16.58  26 0.83539-0.96984 0.30301-0.24032 0.48031 0.01530
  -7   7   4  241.80   12.98  26 0.83529-0.97525 0.30305 0.13698 0.48045-0.19901
  19  -9   3   57.20    6.89  26 0.83511-0.43078 0.30314-0.86857 0.48073-0.25618
  32  -2  -6  -73.72   22.29  26 0.83483-0.17451 0.30327-0.42854 0.48114-0.89077
  -6   0   8  314.46   17.35  26 0.83473-0.94633 0.30331-0.30352 0.48128 0.08628
  25  -9   1   30.47   10.46  26 0.83464-0.30811 0.30336-0.86855 0.48142-0.39613
  20  -6  -2  177.68   13.12  26 0.83464-0.41852 0.30336-0.68003 0.48142-0.61275
   9   7  -4   86.73    6.31  26 0.83455-0.65300 0.30340 0.13651 0.48156-0.76179
  19   3  -6   27.13   11.04  26 0.83455-0.44684 0.30340-0.11477 0.48156-0.89862
  20   2  -6   55.30   12.16  26 0.83455-0.42586 0.30340-0.17757 0.48156-0.89804
   0  -4   5  764.35   22.23  26 0.83445-0.82538 0.30344-0.55503 0.48170-0.12499
  14   2  -5  851.45   27.25  26 0.83436-0.54965 0.30349-0.17768 0.48184-0.83039
  22  -8   0  305.58   15.00  26 0.83417-0.37242 0.30357-0.80594 0.48211-0.46977
  -4  10   3  810.48   26.14  26 0.83417-0.91296 0.30357 0.32510 0.48211-0.27040
  -8   4   5  357.94   16.08  26 0.83408-0.99320 0.30362-0.05225 0.48225-0.12998
  27  -1  -6   42.56   15.99  26 0.83398-0.27850 0.30366-0.36619 0.48239-0.89487
  -7   1   6  175.63   12.22  26 0.83370-0.96994 0.30379-0.24108 0.48280-0.05859
   2   4  -2 2621.13   66.44  26 0.83333-0.79503 0.30396-0.05255 0.48336-0.62490
   7  -3  -1 2307.54   60.02  26 0.83333-0.68817 0.30396-0.49239 0.48336-0.55073
  19  -1  -5  852.14   29.57  26 0.83333-0.44374 0.30396-0.36656 0.48336-0.82909
  -5  -1   8   85.27   11.79  26 0.83314-0.92378 0.30405-0.36717 0.48363 0.08448
  -5   9   3  232.33   12.17  26 0.83286-0.93262 0.30418 0.26161 0.48405-0.27288
  24   0  -6  106.82   15.61  26 0.83267-0.34008 0.30426-0.30401 0.48433-0.89850
  -8   6   5  648.97   23.25  26 0.83248-0.99165 0.30435 0.07280 0.48460-0.13234
  22  -2  -5  136.81   14.04  26 0.83230-0.37976 0.30444-0.42978 0.48488-0.82885
  -4   0  11   31.13   14.96  26 0.83230-0.89650 0.30444-0.30472 0.48488 0.29805
  -7   3  10   65.17   15.34  26 0.83211-0.96127 0.30452-0.11609 0.48515 0.22473
   8   0  -3   66.24    7.26  26 0.83183-0.66934 0.30465-0.30454 0.48557-0.69496
  -7   1   8   61.17   12.16  26 0.83173-0.96440 0.30470-0.24203 0.48571 0.08131
  -6  10   7   60.91   12.96  26 0.83173-0.94537 0.30470 0.32410 0.48571 0.01046
   6  -6  10   -8.62    9.82  26 0.83154-0.68738 0.30478-0.68227 0.48598 0.23094
  16  -2  -4 1555.46   44.67  26 0.83117-0.50264 0.30495-0.43038 0.48653-0.76265
  21  -5  -3  194.34   13.79  26 0.83117-0.39594 0.30495-0.61880 0.48653-0.68860
  -8   4   9  126.94   13.40  26 0.83088-0.98279 0.30508-0.05373 0.48695 0.15094
  11   9  -4    6.88    5.53  26 0.83079-0.60730 0.30512 0.26045 0.48709-0.76621
  -5   1  11   60.21   14.37  26 0.83079-0.91606 0.30512-0.24252 0.48709 0.29531
  34  -4  -5  -10.18   19.28  26 0.83069-0.12660 0.30517-0.55603 0.48722-0.82450
  12   0  -4  115.50    8.39  26 0.83060-0.58601 0.30521-0.30505 0.48736-0.76577
  28  -8  -1   32.40   12.77  26 0.83060-0.24486 0.30521-0.80745 0.48736-0.54295
  16  -6  -1  243.42   11.86  26 0.83051-0.49646 0.30525-0.68203 0.48750-0.54980
  -1  -3  10   -7.00   11.26  26 0.83051-0.83340 0.30525-0.49416 0.48750 0.22561
  19  -3  -4   35.75    7.99  26 0.83041-0.43896 0.30530-0.49351 0.48764-0.76207
  -7   7  10    1.42   12.30  26 0.83032-0.95952 0.30534 0.13476 0.48777 0.22211
  -7   9   7   25.52   11.13  26 0.83032-0.96490 0.30534 0.26053 0.48777 0.00784
  -4  -2   7   59.16    8.05  26 0.83022-0.90159 0.30538-0.43133 0.48791 0.00934
  -3  -1  11    7.59   11.51  26 0.83013-0.87335 0.30543-0.36863 0.48805 0.29543
  29  -5  -4    8.65   11.71  26 0.83013-0.22899 0.30543-0.61915 0.48805-0.75688
  -6  10   6  269.84   16.07  26 0.83003-0.94550 0.30547 0.32331 0.48819-0.06344
  12  -8   9  -13.83    8.32  26 0.83003-0.56167 0.30547-0.80856 0.48819 0.16061
  -6   2   3 2136.99   56.78  26 0.83003-0.95067 0.30547-0.17984 0.48819-0.27754
  -5   3  12  -19.76   14.17  26 0.83003-0.91348 0.30547-0.11704 0.48819 0.36565
   8  -2  -2  172.13    7.95  26 0.82994-0.66562 0.30551-0.43107 0.48833-0.62642
  -8   6   9   20.45   10.37  26 0.82994-0.98190 0.30551 0.07166 0.48833 0.14957
  -5  11   7   33.70   11.67  26 0.82937-0.92199 0.30577 0.38592 0.48915 0.00756
  -3  11   3   29.73    8.59  27 0.82918-0.88696 0.30585 0.38570 0.48943-0.27716
   9   3  -4  697.81   21.08  27 0.82909-0.64747 0.30590-0.11730 0.48956-0.76970
   2  -4  11   14.99   12.52  27 0.82909-0.76718 0.30590-0.55774 0.48956 0.29661
  -6  10   8   43.46   12.04  27 0.82899-0.94087 0.30594 0.32289 0.48970 0.07788
  -2  -2   3  389.00   12.12  27 0.82861-0.86517 0.30611-0.43191 0.49025-0.27737
  13   5  -5  129.11    9.45  27 0.82842-0.56475 0.30620 0.00805 0.49053-0.83972
  -7   9   6   23.28    9.69  27 0.82842-0.96482 0.30620 0.25966 0.49053-0.06632
  27  -7  -2   29.70   11.98  27 0.82842-0.26551 0.30620-0.74561 0.49053-0.61795
   6   2  -3 2181.55   57.07  27 0.82833-0.70785 0.30624-0.18048 0.49066-0.70121
  -6   0   5 1087.78   31.80  27 0.82814-0.94516 0.30632-0.30648 0.49094-0.13756
  21  -7  -1   63.78   10.63  27 0.82804-0.38911 0.30637-0.74590 0.49108-0.55058
   0  -4   9  105.24   10.88  27 0.82795-0.81164 0.30641-0.55816 0.49121 0.15103
  -7   9   8  -21.74   12.52  27 0.82766-0.96052 0.30654 0.25938 0.49163 0.07540
  27  -3  -5  177.98   15.43  27 0.82766-0.27030 0.30654-0.49464 0.49163-0.83279
  -8   2   7   44.83    9.06  27 0.82756-0.98305 0.30658-0.18101 0.49176 0.00329
  -5  11   6   38.61   11.69  27 0.82747-0.92192 0.30662 0.38505 0.49190-0.06660
  -4  -2   6  400.00   15.34  27 0.82747-0.90062 0.30662-0.43253 0.49190-0.06603
  23   9  -6   11.45   15.19  27 0.82728-0.35572 0.30671 0.25878 0.49218-0.90705
  10   8  -4   25.90    5.46  27 0.82718-0.62467 0.30675 0.19600 0.49231-0.77199
  19   5  -6  110.48   12.01  27 0.82709-0.43937 0.30679 0.00746 0.49245-0.90947
  17  -7   0  153.26    9.45  27 0.82699-0.47014 0.30684-0.74647 0.49259-0.48305
  -5  11   8  -13.85   15.97  27 0.82680-0.91764 0.30692 0.38481 0.49286 0.07526
  -6   0   9   84.16   14.43  27 0.82642-0.93627 0.30709-0.30735 0.49341 0.14556
  -4  -2   8   56.10   10.71  27 0.82632-0.89592 0.30713-0.43313 0.49355 0.07510
   3  -5  10   -1.42   10.22  27 0.82623-0.74509 0.30718-0.62183 0.49368 0.22160
   9  -7  10   25.40   10.54  27 0.82613-0.61894 0.30722-0.74754 0.49382 0.22473
  -6   2  11  -16.23   16.15  27 0.82613-0.93237 0.30722-0.18169 0.49382 0.28801
  -5  -1   5   55.15    8.68  27 0.82546-0.92145 0.30752-0.37054 0.49478-0.14084
  18  10  -5   66.19    9.84  27 0.82537-0.45684 0.30756 0.32079 0.49492-0.84136
  29  -1  -6   22.67   17.58  27 0.82537-0.22795 0.30756-0.37007 0.49492-0.90626
   7   1  -3  422.56   14.19  27 0.82517-0.68370 0.30764-0.24471 0.49519-0.70517
  -8   2   6   77.72   11.07  27 0.82489-0.98217 0.30777-0.18219 0.49560-0.07195
  28  -6  -3  170.28   16.60  27 0.82489-0.24285 0.30777-0.68430 0.49560-0.69369
  -8   8   7   20.25   12.33  27 0.82479-0.98045 0.30781 0.19517 0.49574-0.00069
  -8   2   8   50.17   12.72  27 0.82479-0.97852 0.30781-0.18226 0.49574 0.07072
  -6   8   3   25.81    7.32  27 0.82479-0.94556 0.30781 0.19510 0.49574-0.28514
   4  -6   7   43.37    6.70  27 0.82460-0.72788 0.30790-0.68526 0.49601 0.00563
  -5  -1   9  898.59   31.88  27 0.82460-0.91339 0.30790-0.37103 0.49601 0.14350
   5   5  -3   27.20    3.73  27 0.82421-0.72476 0.30807 0.00619 0.49656-0.70771
  -7   1   9  210.25   17.40  27 0.82412-0.95495 0.30811-0.24546 0.49670 0.14172
  -7   1   5 1058.69   32.08  27 0.82412-0.96213 0.30811-0.24538 0.49670-0.14387
  -2  -2  11   24.15   14.15  27 0.82393-0.84604 0.30819-0.43425 0.49697 0.28701
  23   1  -6  143.46   16.42  27 0.82354-0.35192 0.30836-0.24530 0.49752-0.91222
  -9   5   7  800.17   29.35  27 0.82315-0.99973 0.30853 0.00573 0.49806-0.00356
  -7   5   3   79.10    8.19  27 0.82306-0.96479 0.30857 0.00568 0.49820-0.28814
  11   1  -4  423.75   16.38  27 0.82306-0.59948 0.30857-0.24561 0.49820-0.77721
  24  -4  -4   -7.08   13.95  27 0.82296-0.32667 0.30861-0.55959 0.49834-0.76996
   1  -3  12   -9.76   16.97  27 0.82287-0.78014 0.30866-0.49764 0.49847 0.35858
  -6  10   9  164.89   20.64  27 0.82287-0.93288 0.30866 0.32018 0.49847 0.14052
  31  -5  -4   64.53   18.22  27 0.82277-0.17970 0.30870-0.62237 0.49861-0.76626
  -8   8   8   22.55   13.25  27 0.82267-0.97650 0.30874 0.19425 0.49875 0.06772
  -6  10   5   98.00   12.15  27 0.82248-0.93968 0.30883 0.31991 0.49902-0.14567
  -8   8   6   42.54   11.61  27 0.82229-0.97971 0.30891 0.19405 0.49929-0.07565
  10   2  -4   52.27    8.50  27 0.82190-0.61930 0.30908-0.18330 0.49984-0.77941
  -7   9   9   18.75   17.71  27 0.82161-0.95261 0.30920 0.25671 0.50025 0.13819
   7  -7   7   42.13    5.57  27 0.82151-0.66178 0.30925-0.74943 0.50039 0.00291
  12  -2  -3  412.53   16.09  27 0.82112-0.57469 0.30941-0.43491 0.50093-0.70805
  -9   5   8   43.41   12.77  27 0.82112-0.99583 0.30941 0.00484 0.50093 0.06498
  26   0  -6   58.27   15.82  27 0.82103-0.28649 0.30946-0.30916 0.50107-0.91402
  30  -8  -1  358.28   21.62  27 0.82074-0.19307 0.30958-0.81180 0.50148-0.55595
  -8   4  10   36.88   16.75  27 0.82054-0.97071 0.30967-0.05832 0.50175 0.20757
  -7   9   5   75.44   10.82  27 0.82045-0.95865 0.30971 0.25613 0.50189-0.14909
  18   0  -5 3718.65   99.60  27 0.82035-0.45173 0.30975-0.30953 0.50202-0.84828
  -9   5   6   10.15   10.26  27 0.82025-0.99859 0.30979 0.00447 0.50216-0.07906
  -8   6  10   29.10   16.36  27 0.82006-0.97029 0.30988 0.06730 0.50243 0.20690
  -5  11   5   19.93   11.87  27 0.81957-0.91581 0.31009 0.38156 0.50311-0.14922
  20   6  -6  173.75   14.19  27 0.81947-0.41079 0.31013 0.06693 0.50325-0.91971
  22   8  -6   59.59   14.89  27 0.81947-0.36888 0.31013 0.19255 0.50325-0.91866
   4  -6   8  248.65   12.11  27 0.81918-0.72064 0.31025-0.68767 0.50365 0.06937
  20   4  -6  164.84   14.29  27 0.81889-0.41020 0.31038-0.05893 0.50406-0.92051
  29  -3  -5   45.35   17.07  27 0.81889-0.21961 0.31038-0.49846 0.50406-0.84409
   4  -6   6   32.54    5.01  27 0.81889-0.72395 0.31038-0.68766 0.50406-0.07379
  18  -4  -3   65.60   10.56  27 0.81859-0.44629 0.31050-0.56156 0.50447-0.70820
  31  -1  -6   47.18   20.30  27 0.81850-0.17915 0.31054-0.37301 0.50461-0.91474
  -7   3  11   39.20   17.02  27 0.81840-0.94564 0.31059-0.12215 0.50474 0.27653
  24  -2  -5  148.96   15.90  27 0.81820-0.32376 0.31067-0.43601 0.50501-0.84787
  29  -7  -2  259.22   19.01  27 0.81811-0.21326 0.31071-0.75006 0.50515-0.63141
  -8   2   9   43.85   13.57  27 0.81801-0.96991 0.31075-0.18522 0.50529 0.13259
  -4  -2   9   82.42   13.06  27 0.81781-0.88559 0.31084-0.43687 0.50556 0.13449
  22   2  -6   83.80   14.50  27 0.81781-0.36718 0.31084-0.18499 0.50556-0.92087
  27  -9   1   12.05   11.89  27 0.81772-0.24925 0.31088-0.87602 0.50569-0.41927
  -2  12   3   39.69    9.08  27 0.81752-0.85435 0.31096 0.44350 0.50596-0.29318
  33  -5  -4   95.62   20.70  27 0.81732-0.13234 0.31105-0.62470 0.50624-0.77277
  -8   4   4 1554.88   44.19  27 0.81703-0.97792 0.31117-0.05980 0.50664-0.22576
  17  -5  -2   81.57    9.53  27 0.81693-0.46374 0.31121-0.62510 0.50678-0.63977
  21   7  -6  106.68   13.16  27 0.81693-0.38732 0.31121 0.12866 0.50678-0.92275
  -8   8   9   78.16   16.99  27 0.81683-0.96890 0.31125 0.19176 0.50691 0.13098
  -8   6   4  492.15   18.66  27 0.81644-0.97737 0.31142 0.06572 0.50746-0.22658
  30  -6  -3  103.30   17.01  27 0.81634-0.19239 0.31146-0.68798 0.50759-0.70456
  21   3  -6  184.55   14.97  27 0.81605-0.38640 0.31159-0.12294 0.50800-0.92390
  -9   3   7   43.68   11.93  27 0.81575-0.99230 0.31171-0.12326 0.50841-0.01391
  13  -5  -1  408.72   14.91  27 0.81566-0.54457 0.31175-0.62575 0.50854-0.57252
   7  -7   8    5.79    6.33  27 0.81536-0.65380 0.31188-0.75211 0.50895 0.06572
  -3  -3   7  129.56   10.64  27 0.81516-0.86550 0.31196-0.50078 0.50922-0.01142
  -9   5   9   42.36   14.73  27 0.81506-0.98808 0.31200 0.00226 0.50935 0.12798
  -9   7   7  106.38   13.89  27 0.81506-0.99170 0.31200 0.12807 0.50935-0.01486
  21  -1  -5  695.29   26.29  27 0.81506-0.38353 0.31200-0.37456 0.50935-0.85391
  -6   0  10   77.18   14.53  27 0.81487-0.92293 0.31208-0.31237 0.50962 0.20076
  22  -6  -2   88.28   12.30  27 0.81457-0.35653 0.31221-0.68888 0.51003-0.64025
  15  11  -4   72.01    8.37  27 0.81437-0.50698 0.31229 0.37894 0.51030-0.78720
  -8   2   5  447.03   17.61  27 0.81437-0.97343 0.31229-0.18669 0.51030-0.15804
  -9   3   8   40.97   12.89  27 0.81428-0.98895 0.31233-0.12388 0.51044 0.05546
   9   5  -4 3408.45   88.49  27 0.81418-0.63262 0.31237 0.00188 0.51057-0.79076
   5  -5  12  -22.65   16.56  27 0.81408-0.68726 0.31241-0.62712 0.51071 0.34848
  23  -5  -3  957.53   32.42  27 0.81398-0.33679 0.31246-0.62623 0.51084-0.71172
  15  -3  -3  296.66   14.02  27 0.81398-0.50461 0.31246-0.50074 0.51084-0.71627
  -4  -2   5  219.04   10.71  27 0.81388-0.88885 0.31250-0.43839 0.51098-0.15649
  24  -8   0   51.11   11.13  27 0.81378-0.31009 0.31254-0.81488 0.51111-0.49765
  -9   7   8  -18.38   12.82  27 0.81378-0.98855 0.31254 0.12753 0.51111 0.05479
  35  -5  -4   78.80   22.80  27 0.81358-0.08668 0.31262-0.62625 0.51138-0.77679
  14   4  -5  197.53   11.99  27 0.81349-0.52881 0.31266-0.06122 0.51152-0.86008
  -8   8   5   13.81    9.76  27 0.81339-0.97255 0.31270 0.19023 0.51165-0.15941
  32  -8  -1   42.00   18.03  27 0.81329-0.14369 0.31274-0.81488 0.51179-0.56510
  -7   1  10   23.16   13.43  27 0.81319-0.94225 0.31279-0.25017 0.51192 0.19791
  10  -4  -1 9422.64  238.57  27 0.81319-0.60507 0.31279-0.56401 0.51192-0.57760
   0  -4  10   -7.68   11.02  27 0.81289-0.79480 0.31291-0.56473 0.51233 0.20132
   7  -7   6   24.91    4.52  27 0.81289-0.65496 0.31291-0.75301 0.51233-0.08040
  -3  -3   8   12.29    9.34  27 0.81279-0.86133 0.31295-0.50182 0.51246 0.05672
  -5  -1  10   71.64   13.42  27 0.81259-0.89959 0.31303-0.37621 0.51273 0.19819
  -6   4   2 1168.18   32.66  27 0.81259-0.93506 0.31303-0.06165 0.51273-0.37346
  -1  -3  11   26.92   13.22  27 0.81259-0.81367 0.31303-0.50198 0.51273 0.27178
  -6   6   2  232.61   10.24  27 0.81220-0.93469 0.31320 0.06393 0.51327-0.37401
  23  -9   2  224.69   17.03  27 0.81210-0.32568 0.31324-0.87850 0.51341-0.35792
   1  -5   7    3.82    6.87  27 0.81210-0.77838 0.31324-0.62776 0.51341-0.01342
  31  -3  -5   -6.64   16.71  27 0.81200-0.17080 0.31328-0.50133 0.51354-0.85241
  15  -1  -4   68.42    9.01  27 0.81200-0.50448 0.31328-0.37591 0.51354-0.79024
  -4  12   5  -31.47   11.84  27 0.81180-0.88703 0.31336 0.44117 0.51381-0.15938
  -9   3   6   12.13    8.82  27 0.81180-0.99005 0.31336-0.12489 0.51381-0.09072
  17   9  -5  401.21   16.78  27 0.81170-0.46417 0.31340 0.25214 0.51395-0.86096
  28   0  -6   23.27   13.53  27 0.81160-0.23516 0.31344-0.31316 0.51408-0.92596
  -9   7   6   28.19    9.61  27 0.81140-0.98981 0.31353 0.12653 0.51435-0.09127
  37  -5  -4  -38.92   25.35  27 0.81140-0.04258 0.31353-0.62712 0.51435-0.77861
  21  -3  -4  155.26   12.52  27 0.81140-0.37804 0.31353-0.50173 0.51435-0.78767
  -1   9   0 6642.85  168.06  27 0.81101-0.83217 0.31369 0.25202 0.51489-0.51555
  17   1  -5  543.23   19.96  27 0.81091-0.46327 0.31373-0.25071 0.51503-0.86185
  25   1  -6   16.70   10.29  27 0.81081-0.29727 0.31377-0.25071 0.51516-0.92875
  26  -4  -4  336.27   17.76  27 0.81061-0.27237 0.31385-0.56477 0.51543-0.78587
  -9   5   5   91.34    8.58  27 0.81031-0.99040 0.31398 0.00028 0.51583-0.16413
  31  -7  -2   61.60   13.78  27 0.81021-0.16343 0.31402-0.75332 0.51597-0.64109
  32  -6  -3  177.96   15.79  27 0.80991-0.14404 0.31414-0.69065 0.51637-0.71223
  -7   3   3 1205.53   34.02  28 0.80941-0.95107 0.31435-0.12585 0.51704-0.30697
   1  -5   8   30.46    9.25  28 0.80941-0.77388 0.31435-0.62892 0.51704 0.05433
  -3  -3   6   61.02    6.89  28 0.80941-0.86153 0.31435-0.50312 0.51704-0.09064
  -7   7   3 1354.22   38.66  28 0.80931-0.95105 0.31439 0.12563 0.51718-0.30713
  -6   2  12   22.47   13.84  28 0.80921-0.91363 0.31443-0.18892 0.51731 0.33594
   0  10   0  328.66   10.79  28 0.80881-0.80898 0.31459 0.31398 0.51785-0.51796
  11  -3  -2  565.21   18.06  28 0.80861-0.58135 0.31467-0.50303 0.51812-0.65453
  -9   7   9   24.56   12.54  28 0.80851-0.98149 0.31471 0.12537 0.51825 0.11907
  -9   3   9    4.36    9.30  28 0.80851-0.98137 0.31471-0.12627 0.51825 0.11905
   6  -6  11   -8.43   13.00  28 0.80801-0.66200 0.31492-0.69246 0.51893 0.26938
  -8   8  10  -15.60   15.29  28 0.80801-0.95821 0.31492 0.18809 0.51893 0.19038
  -8   2  10  105.92   13.97  28 0.80791-0.95798 0.31496-0.18944 0.51906 0.19022
  23  -7  -1  316.73   15.82  28 0.80791-0.32705 0.31496-0.75446 0.51906-0.57743
  -2  10   1  333.09   12.19  28 0.80771-0.84806 0.31504 0.31357 0.51933-0.44922
  -8   4  11    2.03   15.13  28 0.80761-0.95598 0.31508-0.06375 0.51946 0.26129
  21   5  -6  116.15   12.88  28 0.80761-0.37798 0.31508-0.00082 0.51946-0.93539
   4  -6   9  134.73   10.92  28 0.80731-0.70693 0.31520-0.69265 0.51987 0.12454
  20  -8   1  698.33   22.41  28 0.80731-0.38568 0.31520-0.81767 0.51987-0.43735
  -3   9   1   50.83    6.13  28 0.80700-0.86834 0.31532 0.25041 0.52027-0.45070
  33  -3  -5  153.17   22.40  28 0.80690-0.12378 0.31536-0.50337 0.52040-0.85810
  18  -2  -4  216.60   13.57  28 0.80680-0.43636 0.31540-0.44082 0.52054-0.79554
  14  -4  -2  289.83   12.80  28 0.80670-0.51647 0.31544-0.56657 0.52067-0.65536
  15   3  -5  149.87   11.30  28 0.80640-0.50074 0.31557-0.12694 0.52107-0.86905
  26  -2  -5  177.94   16.74  28 0.80640-0.27002 0.31557-0.44087 0.52107-0.86276
   2  -4  12  -22.48   15.64  28 0.80630-0.74251 0.31561-0.56746 0.52121 0.33635
  15   7  -5  127.62   10.30  28 0.80600-0.50038 0.31573 0.12416 0.52161-0.86966
  -6  10   4  198.56   13.11  28 0.80600-0.92499 0.31573 0.31298 0.52161-0.23966
  -9   5  10  297.06   21.35  28 0.80600-0.97710 0.31573-0.00148 0.52161 0.18713
  16   2  -5   77.50   10.45  28 0.80590-0.47925 0.31577-0.18994 0.52174-0.86913
  -4  -2  10   64.07   13.61  28 0.80560-0.87157 0.31589-0.44197 0.52214 0.18932
   3  -5  11  -29.73   13.45  28 0.80549-0.72250 0.31593-0.63061 0.52228 0.26440
  34  -6  -3  -12.45   20.52  28 0.80539-0.09760 0.31597-0.69245 0.52241-0.71714
  16   8  -5  234.00   12.56  28 0.80519-0.47861 0.31605 0.18666 0.52268-0.87019
  -3  -3   9   88.73   12.77  28 0.80499-0.85168 0.31613-0.50502 0.52295 0.11763
  -3   1   1  426.06   15.84  28 0.80489-0.86609 0.31617-0.25336 0.52308-0.45345
  -6   0   4  145.10   10.20  28 0.80459-0.92337 0.31630-0.31643 0.52348-0.24148
  33  -7  -2   11.91   19.29  28 0.80459-0.11589 0.31630-0.75561 0.52348-0.64750
  30   0  -6   87.87   19.72  28 0.80408-0.18572 0.31650-0.31620 0.52415-0.93488
   1  -5   6  148.89    7.97  28 0.80408-0.77215 0.31650-0.63096 0.52415-0.09553
  -2  -2  12  -33.38   17.88  28 0.80408-0.82435 0.31650-0.44259 0.52415 0.33124
  24   2  -6  151.54   16.07  28 0.80367-0.31112 0.31666-0.19080 0.52468-0.93885
  35  -3  -5  -10.70   25.16  28 0.80357-0.07854 0.31670-0.50473 0.52482-0.86146
  -7   9   4   -6.22    9.04  28 0.80347-0.94342 0.31674 0.24907 0.52495-0.24354
  12  -8  10   50.04   10.38  28 0.80317-0.53294 0.31686-0.81998 0.52535 0.19481
  -5  11   4   11.94    9.36  28 0.80276-0.90075 0.31702 0.37457 0.52589-0.24338
  24   8  -6   29.29   15.63  28 0.80276-0.31024 0.31702 0.18566 0.52589-0.94015
  36  -6  -3   55.19   24.25  28 0.80266-0.05295 0.31706-0.69352 0.52602-0.71963
   7  -7   9    8.55    8.21  28 0.80175-0.63835 0.31742-0.75771 0.52722 0.11882
  38  -6  -3   50.87   31.38  28 0.80154-0.00991 0.31750-0.69394 0.52749-0.71997
  -7   1   4  269.90   13.23  28 0.80144-0.94125 0.31754-0.25481 0.52762-0.24618
  22   4  -6  113.20   14.74  28 0.80134-0.35071 0.31758-0.06613 0.52775-0.94301
  22   6  -6  216.66   16.24  28 0.80093-0.35032 0.31774 0.05932 0.52829-0.94360
  -9   7   5   75.18   10.79  28 0.80073-0.98091 0.31782 0.12222 0.52855-0.17687
  28  -4  -4  268.83   18.85  28 0.80073-0.22058 0.31782-0.56874 0.52855-0.79789
 -10   6   7  112.73   13.73  28 0.80062-0.99820 0.31786 0.05929 0.52868-0.03476
  -6   0  11   46.92   15.83  28 0.80052-0.90671 0.31790-0.31820 0.52882 0.25297
 -10   6   8   25.54   13.22  28 0.80052-0.99628 0.31790 0.05925 0.52882 0.03652
   7  -1  -2 4077.10  104.58  28 0.80042-0.65710 0.31794-0.38068 0.52895-0.66760
  23   3  -6  115.75   15.08  28 0.80032-0.32873 0.31798-0.12933 0.52908-0.94381
  27   1  -6   95.23   16.70  28 0.80032-0.24486 0.31798-0.25491 0.52908-0.94154
  20   0  -5  102.65   13.88  28 0.80022-0.38966 0.31802-0.31778 0.52922-0.87430
 -10   4   7 1460.81   45.28  28 0.80022-0.99773 0.31802-0.06667 0.52922-0.03529
   1  -5   9   12.18    9.38  28 0.80022-0.76285 0.31802-0.63263 0.52922 0.11354
 -10   4   8   57.18   13.33  28 0.80011-0.99584 0.31806-0.06672 0.52935 0.03599
  -9   7  10   -4.43   17.58  28 0.80001-0.97118 0.31810 0.12198 0.52948 0.17926
  25  -5  -3 4038.66  108.92  28 0.79981-0.28070 0.31818-0.63194 0.52975-0.72950
  -9   3   5  137.54   11.62  28 0.79960-0.97971 0.31826-0.12979 0.53001-0.17832
  23  -1  -5  290.06   17.68  28 0.79960-0.32616 0.31826-0.38082 0.53001-0.87346
  -7   1  11   97.20   16.91  28 0.79950-0.92669 0.31830-0.25569 0.53015 0.25109
  23   7  -6  120.80   15.09  28 0.79930-0.32773 0.31838 0.12148 0.53041-0.94519
  -9   3  10   78.90   16.23  28 0.79930-0.97035 0.31838-0.12995 0.53041 0.17831
  18  -6  -1  129.82   10.47  28 0.79899-0.42301 0.31850-0.69526 0.53081-0.59198
  15  -7   1  134.85    7.81  28 0.79878-0.48206 0.31858-0.75829 0.53108-0.45134
  -5  -1   4 2478.88   65.60  28 0.79868-0.89645 0.31862-0.38162 0.53121-0.24865
  24  -6  -2  147.32   14.30  28 0.79786-0.29788 0.31894-0.69558 0.53227-0.66135
  -5  -1  11   41.55   15.46  28 0.79765-0.88282 0.31902-0.38222 0.53254 0.24979
  26  -8   0    9.83   11.09  28 0.79745-0.25182 0.31910-0.82138 0.53280-0.51819
  14  -6   0  490.79   16.27  28 0.79745-0.50356 0.31910-0.69596 0.53280-0.52493
  11  -1  -3 2138.32   57.74  28 0.79714-0.57171 0.31922-0.38190 0.53320-0.74087
  -1  11   1  170.45    8.37  28 0.79704-0.81643 0.31926 0.37223 0.53333-0.46269
  28  -2  -5   26.07   16.03  28 0.79693-0.21865 0.31930-0.44460 0.53347-0.87406
  20  10  -5  115.58   12.52  28 0.79693-0.38649 0.31930 0.30905 0.53347-0.87879
  20  -4  -3  124.16   12.75  28 0.79642-0.38217 0.31950-0.57052 0.53413-0.73670
 -10   6   9   26.53   14.95  28 0.79611-0.99008 0.31962 0.05755 0.53453 0.10223
  14   0  -4  201.78   12.20  28 0.79590-0.50939 0.31970-0.31953 0.53479-0.81207
  -8  10   8  -28.66   16.08  28 0.79559-0.94941 0.31981 0.30899 0.53519 0.03125
 -10   4   9   61.62   14.79  28 0.79559-0.98947 0.31981-0.06847 0.53519 0.10156
   5  -3   0 3782.68   95.87  28 0.79549-0.69050 0.31985-0.50833 0.53532-0.53250
  -8  10   7   -0.57   13.03  28 0.79539-0.95097 0.31989 0.30888 0.53545-0.04043
  -2   8   0  743.45   20.56  28 0.79528-0.83742 0.31993 0.18291 0.53558-0.53679
  23  -3  -4  435.68   20.66  28 0.79528-0.31998 0.31993-0.50811 0.53558-0.80775
 -10   6   6  -35.49   11.60  28 0.79518-0.99455 0.31997 0.05718 0.53572-0.11320
  -8   2  11    8.94   17.65  28 0.79487-0.94317 0.32009-0.19460 0.53611 0.24460
  -8   8   4  131.21   11.14  28 0.79487-0.95579 0.32009 0.18282 0.53611-0.25525
   0  -4  11   24.38   13.59  28 0.79477-0.77484 0.32013-0.57199 0.53624 0.24880
   0  -4   4  288.20    9.89  28 0.79477-0.78748 0.32013-0.57167 0.53624-0.25090
  -4   8   1  143.57    7.45  28 0.79446-0.87679 0.32025 0.18262 0.53664-0.46764
 -10   4   6   -2.66   10.74  28 0.79446-0.99372 0.32025-0.06889 0.53664-0.11411
  19  -7   0  292.06   13.38  28 0.79435-0.39554 0.32029-0.75986 0.53677-0.52608
  15   5  -5   66.48    9.40  28 0.79425-0.48864 0.32033-0.00607 0.53691-0.88496
  -4  10   2  388.36   14.75  28 0.79415-0.87472 0.32037 0.30828 0.53704-0.39671
  -7  11   8  -24.49   17.60  28 0.79415-0.92692 0.32037 0.37133 0.53704 0.02994
  -7  11   7  -38.23   14.86  28 0.79384-0.92839 0.32048 0.37118 0.53743-0.04187
  -4  12   4   13.31   10.21  28 0.79363-0.87059 0.32056 0.43390 0.53770-0.25465
  -9   9   8   27.35   14.77  28 0.79321-0.96803 0.32072 0.24517 0.53823 0.02766
  30  -4  -4  498.03   24.51  28 0.79301-0.17093 0.32080-0.57168 0.53849-0.80667
  -3  -3  10    7.85   12.41  28 0.79290-0.83782 0.32084-0.50979 0.53862 0.17336
  -9   9   7    2.29   12.02  28 0.79280-0.96934 0.32088 0.24498 0.53875-0.04429
  -1  -3  12  -18.41   16.46  28 0.79207-0.79130 0.32115-0.51013 0.53968 0.31623
  26   2  -6  213.92   17.56  28 0.79197-0.25747 0.32119-0.19531 0.53981-0.95276
  29   1  -6    8.30   16.30  28 0.79197-0.19458 0.32119-0.25810 0.53981-0.95109
  -8   0   8  137.08   13.59  28 0.79197-0.94554 0.32119-0.32142 0.53981 0.02662
  -5   9   2  154.24    9.27  28 0.79186-0.89340 0.32123 0.24453 0.53994-0.40015
  -8  10   9    0.35   16.39  28 0.79165-0.94364 0.32131 0.30751 0.54020 0.09765
  25  -7  -1   56.22   11.80  28 0.79155-0.26875 0.32135-0.76080 0.54033-0.59756
  -8   2   4  843.71   26.15  28 0.79124-0.95206 0.32147-0.19586 0.54073-0.25985
  -8   0   7   73.82    9.87  28 0.79124-0.94662 0.32147-0.32168 0.54073-0.04570
  23   5  -6  164.83   15.56  28 0.79113-0.31956 0.32151-0.00725 0.54086-0.95558
  10   4  -4 3810.83   98.92  28 0.79092-0.58835 0.32158-0.07015 0.54112-0.82068
  19  -5  -2  123.02   10.36  28 0.79082-0.39571 0.32162-0.63550 0.54126-0.67312
   4  -6  10    8.56   10.71  28 0.79082-0.68859 0.32162-0.69910 0.54126 0.17453
  -4  -2  11   -1.51   11.88  28 0.79030-0.85440 0.32182-0.44790 0.54191 0.24094
  -2  -4   8   -6.17    8.23  28 0.79019-0.81767 0.32186-0.57359 0.54204 0.02767
  -9   1   8  151.43   11.93  28 0.78988-0.96456 0.32197-0.25934 0.54244 0.02344
  -8  10   6   71.42   10.87  28 0.78978-0.94713 0.32201 0.30673 0.54257-0.11896
  -3  -3   5  338.40   12.34  28 0.78967-0.84359 0.32205-0.51080 0.54270-0.18767
  -3   5   0   70.28    4.39  28 0.78967-0.85273 0.32205-0.00780 0.54270-0.54443
  30  -2  -5  145.69   15.07  28 0.78957-0.16936 0.32209-0.44738 0.54283-0.88229
  -9   5   4 3298.68   87.61  28 0.78957-0.97144 0.32209-0.00784 0.54283-0.26252
  -9   9   9   30.79   13.40  28 0.78946-0.96243 0.32213 0.24377 0.54296 0.09433
  -2  -4   7   12.11    7.68  29 0.78936-0.81863 0.32217-0.57385 0.54310-0.04477
  25  -9   2   20.81   10.92  29 0.78925-0.26090 0.32221-0.88746 0.54323-0.38662
  -9   1   7  240.85   13.05  29 0.78894-0.96540 0.32233-0.25967 0.54362-0.04915
  -7  -1   8   54.68    9.02  29 0.78894-0.92151 0.32233-0.38545 0.54362 0.02335
  10   6  -4   92.56    7.59  29 0.78894-0.58641 0.32233 0.05476 0.54362-0.82324
   1  11   0   -2.54    3.83  29 0.78883-0.76801 0.32236 0.36907 0.54375-0.54332
  19   1  -5  883.41   28.72  29 0.78873-0.39917 0.32240-0.25937 0.54388-0.88957
  -9   7  11   33.62   15.24  29 0.78862-0.95805 0.32244 0.11766 0.54401 0.23617
  27  -5  -3 1953.06   56.98  29 0.78841-0.22738 0.32252-0.63626 0.54428-0.74290
  -5   5   1  562.53   16.99  29 0.78841-0.89167 0.32252-0.00827 0.54428-0.47579
 -10   6  10   11.85   12.03  29 0.78820-0.98039 0.32260 0.05457 0.54454 0.16364
  14  10  -4   33.57    7.06  29 0.78810-0.50167 0.32264 0.30576 0.54467-0.82208
  -7  11   6   80.52   12.79  29 0.78799-0.92441 0.32268 0.36899 0.54480-0.12065
  -7  -1   7  315.19   14.57  29 0.78789-0.92224 0.32271-0.38580 0.54493-0.04936
  -3  11   2   46.32    7.73  29 0.78778-0.84734 0.32275 0.36876 0.54506-0.40418
 -10   4  10  365.84   21.72  29 0.78736-0.97950 0.32291-0.07158 0.54559 0.16259
  32  -4  -4   72.30   17.37  29 0.78736-0.12337 0.32291-0.57376 0.54559-0.81263
  25   3  -6  719.31   27.80  29 0.78736-0.27386 0.32291-0.13425 0.54559-0.95920
  -8   0   9    0.02   10.94  29 0.78726-0.93909 0.32295-0.32322 0.54572 0.09211
  -9   3  11   21.57   14.92  29 0.78705-0.95637 0.32302-0.13462 0.54598 0.23418
 -10   8   8   54.10   13.09  29 0.78684-0.98267 0.32310 0.17988 0.54624 0.01908
  24   4  -6  350.23   19.67  29 0.78684-0.29430 0.32310-0.07164 0.54624-0.96040
  -9   9   6   30.58   11.38  29 0.78673-0.96513 0.32314 0.24271 0.54637-0.12332
  25  -1  -5  126.04   14.12  29 0.78673-0.27135 0.32314-0.38566 0.54637-0.88864
   1  -5  10   19.70   10.72  29 0.78620-0.74704 0.32333-0.63801 0.54703 0.16713
   4  -6   5  712.65   19.87  29 0.78610-0.69296 0.32337-0.70060 0.54716-0.18825
  10  -8   8   28.07   20.72  29 0.78589-0.56129 0.32345-0.82647 0.54742 0.02888
  20  -2  -4   69.58   11.52  29 0.78578-0.37338 0.32349-0.44886 0.54755-0.82135
 -10   8   7   -4.55   11.70  29 0.78578-0.98337 0.32349 0.17947 0.54755-0.05364
  -9   1   9   68.53   13.72  29 0.78568-0.95852 0.32353-0.26090 0.54768 0.08960
  31   1  -6   18.51   21.44  29 0.78568-0.14637 0.32353-0.26043 0.54768-0.95784
  24   6  -6  906.24   32.57  29 0.78557-0.29303 0.32357 0.05350 0.54781-0.96195
  17  -3  -3  773.55   25.53  29 0.78526-0.43395 0.32368-0.51193 0.54820-0.75247
  -8   6   3  704.96   22.73  29 0.78515-0.94787 0.32372 0.05341 0.54833-0.33885
  28  -8   0   67.40   13.57  29 0.78494-0.19738 0.32380-0.82606 0.54860-0.53287
  17  -1  -4  235.83   13.66  29 0.78494-0.43549 0.32380-0.38641 0.54860-0.82416
  -4   2   1 1452.34   38.30  29 0.78483-0.86704 0.32384-0.19817 0.54873-0.47966
  26  -6  -2  365.34   19.21  29 0.78441-0.24250 0.32399-0.70060 0.54925-0.67720
  -7  -1   9  228.01   17.06  29 0.78430-0.91506 0.32403-0.38718 0.54938 0.08899
  32  -2  -5   75.95   20.05  29 0.78409-0.12195 0.32411-0.44934 0.54964-0.88789
  13   1  -4  134.77   10.12  29 0.78409-0.51857 0.32411-0.26112 0.54964-0.82748
  -2  -4   9   21.24   10.47  29 0.78409-0.80974 0.32411-0.57586 0.54964 0.09146
  14  -2  -3  538.96   19.50  29 0.78388-0.49551 0.32418-0.44965 0.54990-0.75587
  34  -4  -4    5.99   22.01  29 0.78367-0.07776 0.32426-0.57512 0.55016-0.81612
 -10   2   8  134.30   14.94  29 0.78356-0.97920 0.32430-0.19876 0.55029 0.01502
 -10   8   9   79.95   17.35  29 0.78356-0.97750 0.32430 0.17868 0.55029 0.08645
  22   0  -5 1104.37   36.13  29 0.78324-0.33077 0.32441-0.32416 0.55068-0.89465
  -8   0   6  140.47   11.32  29 0.78303-0.94023 0.32449-0.32468 0.55094-0.12732
   7  -7  10    9.57    9.73  29 0.78303-0.61780 0.32449-0.76482 0.55094 0.16648
  16   4  -5   81.11   10.49  29 0.78303-0.45644 0.32449-0.07305 0.55094-0.89840
  -8   4   3   81.95    9.04  29 0.78303-0.94567 0.32449-0.07312 0.55094-0.34144
  28   2  -6   30.19   16.11  29 0.78271-0.20630 0.32460-0.19872 0.55134-0.96317
  19   9  -5  265.91   14.81  29 0.78250-0.39301 0.32468 0.24084 0.55160-0.89742
 -11   5   8  107.21   14.73  29 0.78239-0.99918 0.32472-0.01048 0.55173 0.01304
  25  -3  -4   92.97   15.16  29 0.78197-0.26472 0.32487-0.51299 0.55225-0.82321
 -10   6   5   96.59   11.51  29 0.78197-0.98310 0.32487 0.05227 0.55225-0.20113
 -10   2   7   69.22   12.62  29 0.78197-0.97939 0.32487-0.19931 0.55225-0.05833
   3  -5  12   -1.84   16.45  29 0.78186-0.69703 0.32491-0.63964 0.55238 0.30569
  36  -4  -4   54.09   25.03  29 0.78154-0.03371 0.32503-0.57580 0.55277-0.81750
  18   2  -5   64.42   11.39  29 0.78133-0.41275 0.32510-0.19927 0.55303-0.89928
  16   6  -5   85.85    9.55  29 0.78101-0.45442 0.32522 0.05186 0.55342-0.90087
  -9   1   6   64.51   10.54  29 0.78090-0.95914 0.32526-0.26257 0.55355-0.13048
  -5   1   2  820.66   23.64  29 0.78090-0.88229 0.32526-0.26247 0.55355-0.41370
   6  -2  -112386.30  311.58  29 0.78090-0.65675 0.32526-0.45086 0.55355-0.62147
 -11   5   7  812.15   29.69  29 0.78080-0.99935 0.32529-0.01105 0.55368-0.06032
  34  -2  -5  104.22   23.62  29 0.78058-0.07654 0.32537-0.45062 0.55394-0.89113
   6   4  -3 1073.69   29.35  29 0.78058-0.66015 0.32537-0.07395 0.55394-0.76451
  -6   8   2   35.53    6.67  29 0.78048-0.90298 0.32541 0.17747 0.55407-0.41483
  -4   0   2 1326.45   35.48  29 0.78026-0.86065 0.32548-0.32556 0.55433-0.41392
 -10   4   5 1293.08   38.89  29 0.78026-0.98131 0.32548-0.07413 0.55433-0.20319
  -4  -2   4 1723.14   46.50  29 0.78016-0.85689 0.32552-0.45137 0.55446-0.27135
 -10   2   9   15.27   13.61  29 0.77994-0.97386 0.32560-0.20009 0.55472 0.08202
  -1  -3   3 1903.10   49.29  29 0.77994-0.79548 0.32560-0.51425 0.55472-0.34128
  -5  -1  12  444.27   26.71  29 0.77994-0.86330 0.32560-0.38884 0.55472 0.29903
  -6  -2   8  138.41   12.89  29 0.77994-0.89148 0.32560-0.45161 0.55472 0.01279
  22  -8   1  266.72   13.61  29 0.77994-0.31637 0.32560-0.82801 0.55472-0.47106
  11   3  -4  534.46   18.09  29 0.77973-0.55618 0.32567-0.13706 0.55498-0.83396
  -9   7   4   66.46    9.76  29 0.77962-0.96154 0.32571 0.11431 0.55511-0.27481
  29  -5  -3  125.20   16.75  29 0.77962-0.17667 0.32571-0.63945 0.55511-0.75262
 -11   5   9   45.64   15.45  29 0.77930-0.99422 0.32583-0.01158 0.55550 0.08069
  17   3  -5  208.88   13.52  29 0.77909-0.43150 0.32590-0.13726 0.55575-0.90260
 -10   8   6   13.15   11.54  29 0.77887-0.97828 0.32598 0.17697 0.55601-0.13352
  27  -7  -1   64.86   13.68  29 0.77877-0.21404 0.32602-0.76545 0.55614-0.61225
  -7  -1   6  196.64   12.02  29 0.77866-0.91481 0.32605-0.38912 0.55627-0.13209
  -8   0  10   36.68   14.83  29 0.77845-0.92848 0.32613-0.32644 0.55653 0.15271
  12   2  -4  650.03   21.39  29 0.77812-0.53359 0.32624-0.20045 0.55692-0.83533
  22  -4  -3 1037.39   33.61  29 0.77791-0.32174 0.32632-0.57732 0.55718-0.75862
  25   5  -6 1695.61   51.98  29 0.77770-0.26419 0.32640-0.01213 0.55744-0.97098
  -6  -2   7  337.13   15.73  29 0.77759-0.89098 0.32643-0.45243 0.55757-0.06146
  -2  -4   6  210.37   10.64  29 0.77737-0.80849 0.32651-0.57818 0.55783-0.13089
  -3  -3  11   35.96   14.62  29 0.77737-0.82048 0.32651-0.51551 0.55783 0.22557
  -9   1  10   25.24   15.45  29 0.77727-0.94840 0.32655-0.26397 0.55796 0.15075
  18  -8   2  342.52   13.01  29 0.77727-0.39576 0.32655-0.82906 0.55796-0.40523
  27   3  -6  148.27   17.99  29 0.77684-0.22138 0.32670-0.13802 0.55847-0.97083
  10   0  -3 2392.13   63.61  29 0.77651-0.57206 0.32681-0.32666 0.55886-0.76707
  -8  10   5   28.80   10.86  29 0.77651-0.93575 0.32681 0.30193 0.55886-0.20667
 -10   8  10   32.47   21.02  29 0.77651-0.96872 0.32681 0.17619 0.55886 0.14931
  27  -1  -5  348.62   20.84  29 0.77641-0.21909 0.32685-0.38934 0.55899-0.90009
 -11   7   8   11.69   13.67  29 0.77630-0.99307 0.32689 0.11317 0.55912 0.00564
 -10   4  11   70.86   19.76  29 0.77608-0.96641 0.32696-0.07564 0.55938 0.22022
  -6  -2   9  143.01   14.16  29 0.77576-0.88554 0.32708-0.45314 0.55977 0.07915
  30  -8   0  145.61   16.23  29 0.77565-0.14615 0.32711-0.82929 0.55990-0.54301
  30   2  -6  -82.63   20.71  29 0.77554-0.15720 0.32715-0.20124 0.56003-0.97063
  -7  -1  10   61.13   14.63  29 0.77522-0.90420 0.32726-0.39046 0.56041 0.14937
   6   6  -3  941.22   25.61  29 0.77501-0.65457 0.32734 0.04975 0.56067-0.77124
  18   8  -5  160.39   11.76  29 0.77501-0.40647 0.32734 0.17536 0.56067-0.90701
  -6  10   3  186.10   11.60  29 0.77501-0.89578 0.32734 0.30133 0.56067-0.35011
  26   4  -6 1963.13   59.00  29 0.77501-0.24053 0.32734-0.07587 0.56067-0.97364
  -9   3   4  732.62   23.98  29 0.77490-0.95677 0.32738-0.13890 0.56080-0.28050
  -7  11   5   77.23   13.15  29 0.77468-0.91288 0.32745 0.36418 0.56106-0.20831
  17   7  -5   67.05   10.23  29 0.77457-0.42702 0.32749 0.11240 0.56119-0.90810
   6   0  -2  106.64    7.78  29 0.77436-0.65203 0.32757-0.32747 0.56144-0.70065
 -11   7   7   82.64   13.62  29 0.77414-0.99276 0.32764 0.11242 0.56170-0.06836
  11  -5   0  171.21    8.16  29 0.77414-0.54319 0.32764-0.64169 0.56170-0.55549
   1  -5   5   88.19    5.66  29 0.77403-0.74391 0.32768-0.64210 0.56183-0.20459
  22  10  -5   71.14   13.69  29 0.77393-0.32150 0.32772 0.30060 0.56196-0.90604
  10  -8   9   11.23    7.84  29 0.77393-0.54750 0.32772-0.83080 0.56196 0.08571
  28  -6  -2   34.94   13.84  29 0.77382-0.18996 0.32775-0.70424 0.56209-0.68881
   0  12   1    2.10    5.38  29 0.77382-0.77221 0.32775 0.42660 0.56209-0.49091
  15  -5  -1  128.86    8.93  29 0.77371-0.46065 0.32779-0.64173 0.56222-0.62502
   0  -4  12  -18.96   16.35  29 0.77371-0.75192 0.32779-0.57967 0.56222 0.29422
 -11   7   9  -15.48   15.80  29 0.77360-0.98866 0.32783 0.11225 0.56235 0.07384
 -10   2   6  435.48   18.91  29 0.77328-0.97255 0.32794-0.20238 0.56273-0.14023
  26   6  -6  238.01   19.95  29 0.77328-0.23881 0.32794 0.04912 0.56273-0.97574
 -11   3   8   65.61   13.95  29 0.77306-0.98982 0.32802-0.13959 0.56299 0.00177
  31  -5  -3  107.65   17.75  29 0.77306-0.12817 0.32802-0.64166 0.56299-0.75930
  -9   9   5   57.45   11.44  29 0.77306-0.95325 0.32802 0.23782 0.56299-0.21134
  11   7  -4  150.88    8.46  29 0.77306-0.54955 0.32802 0.11190 0.56299-0.84204
 -11   5   6   44.53   11.44  29 0.77284-0.99323 0.32809-0.01385 0.56325-0.14131
  -2  -4  10   68.39   12.56  29 0.77284-0.79670 0.32809-0.57992 0.56325 0.14926
  20  -6  -1  354.24   15.88  29 0.77273-0.35480 0.32813-0.70481 0.56338-0.62337
  13   9  -4   72.36    7.45  29 0.77252-0.50706 0.32820 0.23736 0.56363-0.84157
  16  -4  -2  734.28   23.72  29 0.77241-0.44022 0.32824-0.57932 0.56376-0.69729
  -7   5   2  180.94    9.37  29 0.77230-0.91580 0.32828-0.01403 0.56389-0.42521
 -10   2  10   22.45   15.86  29 0.77230-0.96443 0.32828-0.20279 0.56389 0.14426
  -2   2   0 1586.20   40.53  29 0.77230-0.81432 0.32828-0.20259 0.56389-0.56503
 -11   5  10  390.54   23.83  29 0.77219-0.98544 0.32831-0.01408 0.56402 0.14360
  27  -9   2    7.92   11.79  29 0.77219-0.20190 0.32831-0.89350 0.56402-0.40628
  -2  12   2   11.95    7.56  29 0.77208-0.81066 0.32835 0.42604 0.56415-0.42273
  -4  -2  12   60.77   18.72  29 0.77197-0.83431 0.32839-0.45454 0.56428 0.29001
  -7   9   3   86.43    9.56  29 0.77154-0.91332 0.32854 0.23725 0.56479-0.35479
  19  -9   4   88.02    6.60  29 0.77154-0.36537 0.32854-0.89398 0.56479-0.26889
  27  -3  -4  125.15   16.31  29 0.77143-0.21226 0.32858-0.51666 0.56492-0.83473
  -5  11   3  217.50   12.35  29 0.77111-0.87088 0.32869 0.36287 0.56531-0.35420
 -11   3   9   95.27   13.83  29 0.77045-0.98542 0.32891-0.14050 0.56608 0.07010
 -11   3   7   52.80   11.63  29 0.77045-0.98897 0.32891-0.14048 0.56608-0.07273
   4  -6  11  112.33   14.92  29 0.77034-0.66631 0.32895-0.70651 0.56620 0.22098
  21   1  -5  687.50   24.69  29 0.77002-0.33853 0.32906-0.26601 0.56659-0.91112
  32  -8   0   78.86   16.74  29 0.76936-0.09793 0.32928-0.83141 0.56736-0.54934
   3   3  -2  338.51   10.18  29 0.76936-0.71005 0.32928-0.14071 0.56736-0.70830
  24   0  -5  162.85   12.65  29 0.76914-0.27472 0.32936-0.32906 0.56761-0.91035
  29  -7  -1  501.93   22.02  29 0.76904-0.16236 0.32939-0.76873 0.56774-0.62266
  21  -5  -2  450.64   18.03  29 0.76904-0.33197 0.32939-0.64321 0.56774-0.69843
  10  -2  -2  684.65   20.55  29 0.76904-0.56276 0.32939-0.45492 0.56774-0.70468
  29   3  -6  113.28   14.62  29 0.76882-0.17145 0.32947-0.14078 0.56800-0.97924
  33  -5  -3   32.67   14.54  29 0.76871-0.08190 0.32951-0.64310 0.56813-0.76327
  -5   7   1   67.84    5.92  29 0.76849-0.87179 0.32958 0.11041 0.56838-0.49993
  29  -1  -5  126.37   14.06  29 0.76849-0.16926 0.32958-0.39206 0.56838-0.90835
   1  -5  11   24.03   12.90  29 0.76838-0.72737 0.32962-0.64433 0.56851 0.21704
  -6   2   2 2341.30   61.17  29 0.76838-0.89079 0.32962-0.20398 0.56851-0.42924
  22  -2  -4  288.05   14.55  29 0.76827-0.31393 0.32965-0.45498 0.56864-0.84126
  21  -7   0   87.12   10.13  29 0.76794-0.32718 0.32976-0.76927 0.56902-0.55717
  12   8  -4   71.96    7.58  30 0.76750-0.52302 0.32991 0.17283 0.56953-0.84802
 -11   7  10   25.78   13.27  30 0.76718-0.98040 0.33002 0.11006 0.56992 0.13770
  27   5  -6 1959.84   58.14  30 0.76707-0.21163 0.33006-0.01579 0.57005-0.98243
  -6  -2  10   52.12   10.96  30 0.76685-0.87481 0.33013-0.45623 0.57030 0.14002
  39  -5  -3  -41.36   27.83  30 0.76663 0.04593 0.33021-0.64377 0.57056-0.76237
  35  -5  -3   69.74   18.78  30 0.76630-0.03757 0.33032-0.64387 0.57094-0.76493
  30  -6  -2   61.09   14.27  30 0.76619-0.14041 0.33036-0.70687 0.57107-0.69671
  -8   0  11   34.46   14.13  30 0.76619-0.91437 0.33036-0.33068 0.57107 0.20959
  -6  -2   6  266.85   12.52  30 0.76597-0.88115 0.33043-0.45640 0.57132-0.14660
 -11   7   6   17.89   10.52  30 0.76586-0.98625 0.33047 0.10958 0.57145-0.14952
   8  -4   0 1330.09   35.39  30 0.76575-0.59776 0.33050-0.58176 0.57158-0.56704
  28   4  -6 1459.97   47.09  30 0.76575-0.18934 0.33050-0.07902 0.57158-0.98335
  16   0  -4   24.48    7.46  30 0.76575-0.43726 0.33050-0.33029 0.57158-0.84765
  37  -5  -3   40.40   21.50  30 0.76564 0.00500 0.33054-0.64406 0.57171-0.76456
  -9   1  11   25.04   14.49  30 0.76553-0.93485 0.33058-0.26803 0.57183 0.20830
  17   5  -5   17.37    9.33  30 0.76509-0.41750 0.33072-0.01646 0.57234-0.91915
 -10   8   5   41.10   10.60  30 0.76399-0.96516 0.33109 0.17184 0.57362-0.22252
 -11   3  10   -1.94   16.51  30 0.76366-0.97686 0.33120-0.14281 0.57400 0.13361
  -8   0   5  417.03   16.62  30 0.76344-0.92247 0.33127-0.33146 0.57425-0.22203
  29  -3  -4   58.99   15.77  30 0.76344-0.16235 0.33127-0.51935 0.57425-0.84296
  -5  -3   8   46.55   10.45  30 0.76333-0.85388 0.33131-0.52023 0.57438-0.00633
  13  -3  -2  165.03   10.48  30 0.76310-0.49386 0.33138-0.51968 0.57463-0.70985
  24  -4  -3 1123.18   36.58  30 0.76277-0.26465 0.33149-0.58243 0.57502-0.77526
  31  -1  -5  100.55   19.61  30 0.76266-0.12151 0.33153-0.39397 0.57514-0.91392
  -7  -1  11    3.02   15.93  30 0.76255-0.88970 0.33156-0.39479 0.57527 0.20592
  -9   1   5  124.96   10.97  30 0.76222-0.94228 0.33167-0.26899 0.57565-0.22398
  31  -7  -1  127.58   16.70  30 0.76222-0.11362 0.33167-0.77096 0.57565-0.62943
  19  -1  -4  392.09   17.75  30 0.76189-0.37048 0.33178-0.39435 0.57603-0.85038
   9   1  -3  430.08   15.19  30 0.76156-0.57812 0.33189-0.26894 0.57641-0.78522
 -10   2  11   76.03   18.01  30 0.76122-0.95156 0.33200-0.20654 0.57679 0.20279
   2  -6   8  141.13   10.06  30 0.76122-0.70464 0.33200-0.70943 0.57679-0.00490
 -12   6   8   46.38   14.28  30 0.76111-0.99889 0.33204 0.04511 0.57692-0.01273
  19  -3  -3  602.50   21.94  30 0.76100-0.36774 0.33207-0.52027 0.57705-0.78013
  32  -6  -2  168.68   19.03  30 0.76089-0.09319 0.33211-0.70857 0.57717-0.70166
 -11   3   6  193.80   13.87  30 0.76078-0.98108 0.33215-0.14370 0.57730-0.15536
  20   2  -5   47.90   11.79  30 0.76067-0.35016 0.33218-0.20633 0.57743-0.92253
  -5  -3   9  103.00   13.18  30 0.76056-0.84929 0.33222-0.52117 0.57755 0.06189
  -8   8   3   50.75    8.82  30 0.76056-0.92331 0.33222 0.17068 0.57755-0.36810
   7  -7  11   22.19   12.76  30 0.76000-0.59295 0.33240-0.77281 0.57819 0.21063
  -4  12   3    0.46    8.75  30 0.75956-0.83834 0.33255 0.42190 0.57869-0.36705
 -12   6   9   44.62   15.77  30 0.75956-0.99555 0.33255 0.04461 0.57869 0.05692
  11   5  -4 1332.85   37.32  30 0.75945-0.53591 0.33258-0.01832 0.57882-0.85781
   7   3  -3 1196.60   32.84  30 0.75945-0.61801 0.33258-0.14399 0.57882-0.78879
 -10  10   8   52.03   16.93  30 0.75922-0.95507 0.33265 0.29616 0.57907-0.01378
  21   9  -5   21.04   11.36  30 0.75900-0.32756 0.33273 0.23278 0.57933-0.92397
  -7   7   2  290.50   11.89  30 0.75889-0.90241 0.33276 0.10724 0.57945-0.44079
 -12   4   8   92.10   14.44  30 0.75889-0.99662 0.33276-0.08143 0.57945-0.01526
  33  -1  -5  222.12   23.98  30 0.75889-0.07582 0.33276-0.39521 0.57945-0.91713
  24  -8   1   55.50   10.75  30 0.75878-0.25325 0.33280-0.83512 0.57958-0.49476
  -3  -3  12    6.83   16.77  30 0.75867-0.79996 0.33284-0.52189 0.57971 0.27510
  -5  -3   7  306.25   14.59  30 0.75867-0.85097 0.33284-0.52168 0.57971-0.08305
  -9  11   8   49.31   18.67  30 0.75856-0.93334 0.33287 0.35884 0.57983-0.01399
  -3  -1   2 2231.12   57.59  30 0.75844-0.81781 0.33291-0.39584 0.57996-0.43900
  26   0  -5   16.38   13.76  30 0.75800-0.22166 0.33305-0.33275 0.58047-0.92208
  23  -9   3   85.11   17.51  30 0.75800-0.26975 0.33305-0.89835 0.58047-0.35364
  33  -7  -1   77.14   19.21  30 0.75800-0.06748 0.33305-0.77235 0.58047-0.63315
  34  -6  -2  271.09   22.88  30 0.75778-0.04815 0.33312-0.70953 0.58072-0.70405
 -10  10   9   26.19   18.96  30 0.75778-0.95184 0.33312 0.29572 0.58072 0.05600
  31  -3  -4  106.37   18.34  30 0.75766-0.11465 0.33316-0.52121 0.58084-0.84840
  -2  -4  11   52.05   14.31  30 0.75755-0.77960 0.33320-0.58507 0.58097 0.20294
 -12   6   7  335.15   18.87  30 0.75755-0.99710 0.33320 0.04395 0.58097-0.08819
 -12   4   9   12.09   13.22  30 0.75744-0.99338 0.33323-0.08191 0.58110 0.05451
  -3   7   0   19.38    3.24  30 0.75733-0.82043 0.33327 0.10671 0.58122-0.58299
  38  -6  -2   90.78   29.41  30 0.75722 0.03624 0.33330-0.70965 0.58135-0.70243
  18   4  -5  107.65   11.47  30 0.75722-0.38866 0.33330-0.08185 0.58135-0.92760
   2  -6   9   38.28    9.48  30 0.75722-0.69882 0.33330-0.71078 0.58135 0.06193
 -10   6   4   78.35    9.62  30 0.75699-0.95992 0.33338 0.04376 0.58160-0.30188
  -7  -1   5 1110.82   32.70  30 0.75666-0.89464 0.33348-0.39654 0.58198-0.22920
  36  -6  -2  135.32   22.86  30 0.75666-0.00512 0.33348-0.70988 0.58198-0.70420
  12  -4  -1 4657.44  119.92  30 0.75621-0.50611 0.33363-0.58478 0.58248-0.64697
 -11   5   5   39.23   10.06  30 0.75610-0.97825 0.33366-0.01942 0.58261-0.23207
  19   3  -5   42.43   11.27  30 0.75610-0.36658 0.33366-0.14501 0.58261-0.92830
  35  -7  -1   76.59   21.51  30 0.75588-0.02343 0.33374-0.77297 0.58286-0.63440
 -11   9   8   -4.83   15.57  30 0.75588-0.97265 0.33374 0.23215 0.58286-0.01812
 -10  10   7   42.72   14.47  30 0.75576-0.95334 0.33377 0.29500 0.58299-0.08911
   5   1  -2  812.18   22.72  30 0.75565-0.65434 0.33381-0.27089 0.58311-0.72290
  13  -1  -3  473.10   17.90  30 0.75520-0.48783 0.33395-0.39661 0.58362-0.79014
  -9  11   7   42.53   16.35  30 0.75498-0.93158 0.33402 0.35767 0.58387-0.08945
 -12   4   7  412.03   20.35  30 0.75487-0.99444 0.33406-0.08273 0.58400-0.09122
 -11   9   9    4.99   18.16  30 0.75464-0.96969 0.33413 0.23179 0.58425 0.05192
   8   2  -3 1040.53   29.39  30 0.75464-0.59220 0.33413-0.20835 0.58425-0.79362
  -7   1   3  410.38   15.01  30 0.75464-0.89625 0.33413-0.27138 0.58425-0.37419
  23   1  -5  248.22   16.67  30 0.75464-0.28122 0.33413-0.27106 0.58425-0.92761
  -1  -5   8   34.25    9.29  30 0.75453-0.76097 0.33417-0.64876 0.58437-0.01413
 -10   2   5  170.48   12.28  30 0.75453-0.95556 0.33417-0.20859 0.58437-0.23326
  10  -8  10   35.22   10.11  30 0.75442-0.52616 0.33420-0.83735 0.58450 0.13454
   2  -6   7   69.43    7.10  30 0.75419-0.69943 0.33427-0.71165 0.58475-0.08424
  12  -6   1  192.84    8.06  30 0.75419-0.50043 0.33427-0.71118 0.58475-0.50667
  24  -2  -4  159.31   33.55  30 0.75408-0.25781 0.33431-0.45960 0.58488-0.85634
  -6  -2  11    4.45   15.04  30 0.75397-0.86014 0.33434-0.46049 0.58500 0.19674
  16  -6   0  446.50   15.88  30 0.75397-0.41811 0.33434-0.71114 0.58500-0.57596
  33  -3  -4   26.52   19.08  30 0.75397-0.06904 0.33434-0.52238 0.58500-0.85143
 -12   6  10   75.10   19.13  30 0.75386-0.98809 0.33438 0.04277 0.58513 0.12192
   9  -3  -1 3747.36   96.36  30 0.75363-0.56650 0.33445-0.52283 0.58538-0.65158
  18   6  -5  169.30   12.53  30 0.75363-0.38509 0.33445 0.04263 0.58538-0.93166
  -6   0   3 1114.93   31.24  30 0.75352-0.87410 0.33449-0.33460 0.58551-0.37488
 -11   3  11   31.17   17.81  30 0.75341-0.96478 0.33452-0.14614 0.58563 0.19340
  -5   3   119151.80  480.72  30 0.75329-0.85652 0.33456-0.14604 0.58576-0.51727
 -10   4   4 4053.46  106.55  30 0.75307-0.95598 0.33463-0.08328 0.58601-0.30629
  17  -7   1  327.70   12.92  30 0.75307-0.39438 0.33463-0.77426 0.58601-0.50511
  -5  -3  10   39.16   12.75  30 0.75228-0.83920 0.33488-0.52387 0.58689 0.12397
  -8  10   4   78.98   11.11  30 0.75228-0.91323 0.33488 0.29382 0.58689-0.30608
  35  -3  -4   52.16   21.83  30 0.75206-0.02521 0.33495-0.52293 0.58714-0.85237
  16  -2  -3  292.29   14.36  30 0.75206-0.42173 0.33495-0.46038 0.58714-0.79192
  -1  -5   9   18.46    9.86  30 0.75194-0.75660 0.33499-0.64966 0.58726 0.05437
 -11   9   7   12.29   13.14  30 0.75194-0.97056 0.33499 0.23089 0.58726-0.09394
  37  -3  -4   52.68   27.38  30 0.75183 0.01693 0.33502-0.52295 0.58739-0.85146
  22  -6  -1  500.83   20.21  30 0.75172-0.29185 0.33506-0.71172 0.58751-0.64638
 -12   4  10  219.12   20.55  30 0.75172-0.98583 0.33506-0.08374 0.58751 0.11952
  23  -5  -2  757.58   26.85  30 0.75149-0.27249 0.33513-0.64890 0.58776-0.71730
  26  -4  -3 6122.45  160.96  30 0.75093-0.21088 0.33530-0.58621 0.58839-0.78749
   5  -7   8   65.01    7.52  30 0.75081-0.63122 0.33534-0.77560 0.58852-0.01498
  -9   5   3  189.45   10.68  30 0.75081-0.93453 0.33534-0.02110 0.58852-0.37961
  15   1  -4   50.36    9.58  30 0.75059-0.44309 0.33541-0.27239 0.58877-0.86540
  20   8  -5  265.13   15.36  30 0.75059-0.34013 0.33541 0.16729 0.58877-0.93397
   4   2  -2 1157.38   30.72  30 0.75036-0.67004 0.33548-0.20974 0.58902-0.72937
  -7  11   4   44.21   10.68  30 0.75002-0.89001 0.33559 0.35601 0.58939-0.30805
  28   0  -5   71.57   16.45  30 0.74946-0.17121 0.33576-0.33546 0.59002-0.93053
 -11   7   5  102.02   11.69  30 0.74900-0.97113 0.33591 0.10412 0.59052-0.23998
  19   7  -5  262.11   14.57  30 0.74878-0.35928 0.33598 0.10392 0.59077-0.93651
 -12   8   8  -11.38   12.84  30 0.74821-0.98599 0.33615 0.16682 0.59139-0.02721
  -9   9   4    8.75    8.90  30 0.74798-0.92996 0.33622 0.22959 0.59164-0.31140
 -12   8   9   20.51   15.51  30 0.74753-0.98359 0.33636 0.16663 0.59214 0.04347
   5  -7   9   -3.48    8.72  30 0.74753-0.62610 0.33636-0.77667 0.59214 0.05278
  23  -7   0  270.32   14.11  30 0.74730-0.26460 0.33643-0.77591 0.59239-0.57940
  -1  -5   7   -1.63    6.88  30 0.74719-0.75545 0.33647-0.65103 0.59251-0.09366
 -12   6   6  232.72   14.64  30 0.74719-0.98855 0.33647 0.04067 0.59251-0.17115
   1  -5  12   -1.58   14.23  30 0.74696-0.70415 0.33654-0.65133 0.59276 0.26420
  -7  -1  12   47.33   16.79  30 0.74662-0.87196 0.33664-0.39991 0.59314 0.25948
  -7   3   2  195.42    8.43  30 0.74639-0.88983 0.33671-0.14821 0.59339-0.45469
   2  -6  10   18.75   11.33  30 0.74605-0.68584 0.33682-0.71437 0.59376 0.12091
 -10   0   8  156.57   11.97  30 0.74582-0.94144 0.33689-0.33716 0.59401-0.02873
 -10  10   6   21.64   10.29  30 0.74571-0.94511 0.33692 0.29183 0.59413-0.17167
  -8   2   3 1108.40   31.59  30 0.74571-0.90832 0.33692-0.21131 0.59413-0.38464
  10  10  -3  115.24    6.34  30 0.74559-0.54126 0.33696 0.29148 0.59426-0.80261
  -2  -4   5  224.00    9.80  31 0.74536-0.77826 0.33703-0.58864 0.59451-0.23894
 -10   0   9   38.83   10.00  31 0.74514-0.93900 0.33710-0.33741 0.59475 0.04194
 -11   1   8   46.84    9.78  31 0.74491-0.96156 0.33717-0.27455 0.59500-0.03027
  -9  11   6   60.13   12.37  31 0.74491-0.92329 0.33717 0.35449 0.59500-0.17199
 -12   6  11    6.94   15.05  31 0.74468-0.97713 0.33724 0.03992 0.59525 0.18324
 -11   1   9   20.73    9.95  31 0.74445-0.95928 0.33731-0.27470 0.59550 0.04064
  18  -4  -2  565.68   19.66  31 0.74399-0.36987 0.33745-0.58850 0.59600-0.72837
  16  10  -4   58.20    9.00  31 0.74376-0.41538 0.33752 0.29086 0.59624-0.87247
 -12   4   6   29.38    9.62  31 0.74376-0.98505 0.33752-0.08618 0.59624-0.17487
  22   2  -5  125.77   11.59  31 0.74365-0.29119 0.33755-0.21167 0.59637-0.94026
 -12   8   7   16.96   11.80  31 0.74354-0.98314 0.33759 0.16538 0.59649-0.10373
  12   4  -4  202.49   10.60  31 0.74319-0.49867 0.33769-0.08625 0.59686-0.87525
  30   0  -5   60.69   15.00  31 0.74319-0.12302 0.33769-0.33735 0.59686-0.93621
  26  -8   1   50.06   11.35  31 0.74308-0.19561 0.33772-0.84000 0.59699-0.51104
  26  -2  -4   78.75   31.26  31 0.74296-0.20477 0.33776-0.46303 0.59711-0.86743
  21  -1  -4  369.31   17.43  31 0.74296-0.30962 0.33776-0.40030 0.59711-0.87030
  -1  -5  10  -26.29   11.04  31 0.74273-0.74558 0.33783-0.65256 0.59736 0.11567
 -12   8  10   -6.02   17.71  31 0.74273-0.97694 0.33783 0.16517 0.59736 0.10967
  -5  -3   6  464.75   16.98  31 0.74250-0.83661 0.33790-0.52671 0.59761-0.17234
  25   1  -5  115.91   15.50  31 0.74239-0.22704 0.33793-0.27484 0.59773-0.93992
 -12   4  11   65.82   18.52  31 0.74227-0.97466 0.33797-0.08667 0.59786 0.18062
  28  -4  -3  709.25   28.11  31 0.74205-0.16008 0.33804-0.58893 0.59810-0.79609
  -3  -3   4  700.17   20.72  31 0.74182-0.79754 0.33811-0.52683 0.59835-0.31470
 -11   9   6  106.26   13.70  31 0.74147-0.96186 0.33821 0.22764 0.59872-0.17682
  -9   7   3  740.75   24.04  31 0.74136-0.92509 0.33824 0.10177 0.59885-0.38996
  -9  -1   8  178.40   14.97  31 0.74124-0.91584 0.33828-0.40145 0.59897-0.03314
  -6  12   4  187.31   13.69  31 0.74124-0.86021 0.33828 0.41620 0.59897-0.31707
  21  -3  -3   77.05   11.34  31 0.74124-0.30606 0.33828-0.52647 0.59897-0.80093
  19   5  -5   29.88   10.50  31 0.74124-0.35174 0.33828-0.02401 0.59897-0.94468
 -11   3   5  206.78   13.29  31 0.74101-0.96310 0.33835-0.14990 0.59922-0.24868
   7   7  -3 1337.61   35.64  31 0.74101-0.59962 0.33835 0.10158 0.59922-0.80924
  -9  -1   9   72.16   13.60  31 0.74090-0.91373 0.33838-0.40159 0.59934 0.03790
 -13   5   8   17.50   13.44  31 0.74090-0.99966 0.33838-0.02415 0.59934-0.03572
 -13   5   9   22.94   15.39  31 0.74078-0.99780 0.33842-0.02419 0.59946 0.03558
  14   2  -4  338.63   14.69  31 0.74078-0.45429 0.33842-0.21260 0.59946-0.87671
  18   0  -4  120.64   11.47  31 0.74055-0.37013 0.33849-0.33825 0.59971-0.87461
  23   9  -5   42.27   13.93  31 0.74055-0.26718 0.33849 0.22702 0.59971-0.94320
 -10   0   7   62.43   12.47  31 0.73975-0.93719 0.33873-0.33899 0.60058-0.10670
  20  -8   2  132.10    9.08  31 0.73975-0.31629 0.33873-0.84119 0.60058-0.44671
  -5  -3  11   20.30   14.71  31 0.73963-0.82471 0.33876-0.52778 0.60070 0.18156
 -10   0  10   40.51   15.24  31 0.73940-0.93147 0.33883-0.33918 0.60095 0.10717
  17  -5  -1   40.23    8.10  31 0.73940-0.38442 0.33883-0.65276 0.60095-0.66263
  -6  -2   5   57.84    8.55  31 0.73929-0.85625 0.33887-0.46480 0.60107-0.24774
   5  -7   7   38.29    5.96  31 0.73929-0.62149 0.33887-0.77905 0.60107-0.09891
 -12   2   9    4.20   13.86  31 0.73917-0.97512 0.33890-0.21342 0.60119 0.03440
 -12   2   8  279.55   18.52  31 0.73917-0.97690 0.33890-0.21340 0.60119-0.03702
  32   0  -5  279.79   22.49  31 0.73905-0.07696 0.33893-0.33857 0.60132-0.93948
 -11   1   7  103.74   12.98  31 0.73905-0.95749 0.33893-0.27629 0.60132-0.10799
 -11   1  10   32.20   15.80  31 0.73894-0.95206 0.33897-0.27641 0.60144 0.10613
  -2  -4  12  -29.88   17.33  31 0.73871-0.75890 0.33904-0.59094 0.60169 0.25363
  -5  -1   3   34.18    6.14  31 0.73836-0.83791 0.33914-0.40211 0.60206-0.39087
  25  -5  -2  120.38   14.85  31 0.73778-0.21685 0.33931-0.65303 0.60267-0.73105
  -6  -2  12   -7.16   19.12  31 0.73778-0.84205 0.33931-0.46545 0.60267 0.25046
  13   3  -4  847.81   26.15  31 0.73767-0.47216 0.33935-0.15071 0.60280-0.88060
  21   3  -5  253.99   15.82  31 0.73721-0.30574 0.33948-0.15081 0.60329-0.94778
 -10   8   4   16.61    9.78  31 0.73721-0.94013 0.33948 0.16343 0.60329-0.32359
  34   0  -5  157.86   25.21  31 0.73686-0.03285 0.33958-0.33920 0.60366-0.94068
  -4  -4   8   92.42   11.20  31 0.73686-0.80631 0.33958-0.59133 0.60366-0.03508
  12   6  -4  176.67    9.79  31 0.73663-0.49212 0.33965 0.03743 0.60390-0.88231
  -4  -4   9   91.02   12.13  31 0.73663-0.80430 0.33965-0.59147 0.60390 0.03607
 -13   7   9   26.73   16.68  31 0.73628-0.99333 0.33976 0.10031 0.60427 0.03077
 -13   5  10   53.75   17.64  31 0.73628-0.99142 0.33976-0.02553 0.60427 0.10220
  20   4  -5  172.91   13.76  31 0.73605-0.32555 0.33982-0.08836 0.60452-0.94959
 -13   7   8   71.70   14.97  31 0.73605-0.99485 0.33982 0.10023 0.60452-0.04090
  19  11  -4    8.47   10.24  31 0.73582-0.34451 0.33989 0.35130 0.60476-0.87930
  30  -4  -3  302.82   19.72  31 0.73570-0.11181 0.33993-0.59077 0.60489-0.80171
   5  -7  10  -20.89   10.09  31 0.73547-0.61223 0.33999-0.78038 0.60513 0.11117
  25  -9   3   12.48    9.68  31 0.73535-0.20516 0.34003-0.90525 0.60525-0.37730
 -13   5   7  106.65   14.21  31 0.73535-0.99587 0.34003-0.02580 0.60525-0.11304
  24  -6  -1  300.95   16.36  31 0.73524-0.23343 0.34006-0.71666 0.60538-0.66308
  -9  -1  10   85.80   15.96  31 0.73524-0.90621 0.34006-0.40329 0.60538 0.10327
  28  -2  -4   31.80   15.31  31 0.73466-0.15455 0.34023-0.46550 0.60599-0.87520
 -12   2  10   72.05   17.22  31 0.73442-0.96847 0.34030-0.21481 0.60624 0.10077
  -9  -1   7  255.42   15.03  31 0.73442-0.91077 0.34030-0.40342 0.60624-0.11181
  27   1  -5  344.02   20.67  31 0.73303-0.17575 0.34071-0.27760 0.60771-0.94876
 -12   2   7  119.38   13.63  31 0.73303-0.97246 0.34071-0.21517 0.60771-0.11494
 -13   7  10   14.44   19.47  31 0.73209-0.98736 0.34098 0.09910 0.60868 0.09779
 -12   8   6    6.05   12.38  31 0.73198-0.97340 0.34101 0.16194 0.60881-0.18747
  28  -8   1   10.98   12.80  31 0.73186-0.14246 0.34104-0.84326 0.60893-0.52184
  32  -4  -3   77.29   17.35  31 0.73174-0.06593 0.34108-0.59191 0.60905-0.80475
  25  -7   0   97.67   12.68  31 0.73163-0.20700 0.34111-0.78055 0.60917-0.59505
  20   6  -5   27.86   11.00  31 0.73139-0.32091 0.34118 0.03590 0.60942-0.95450
  38  -4  -3   -4.12   26.00  31 0.73128 0.06028 0.34121-0.59197 0.60954-0.80185
  22   8  -5  120.68   13.63  31 0.73116-0.27875 0.34125 0.16145 0.60966-0.95367
  -8  -2   9   31.70   13.14  31 0.73081-0.88256 0.34135-0.46743 0.61003 0.02775
 -13   7   7   18.57   13.18  31 0.73022-0.99082 0.34152 0.09853 0.61064-0.11844
  24   2  -5  178.38   15.87  31 0.73022-0.23585 0.34152-0.21563 0.61064-0.95341
  -8  -2   8   87.10   12.57  31 0.73011-0.88368 0.34155-0.46761 0.61076-0.04439
 -13   3   9   22.59   14.71  31 0.72999-0.98693 0.34158-0.15319 0.61088 0.02415
  -4  -4  10   31.57   12.39  31 0.72987-0.79569 0.34162-0.59345 0.61100 0.10037
  34  -4  -3   28.45   19.17  31 0.72976-0.02203 0.34165-0.59241 0.61113-0.80563
  36  -4  -3   85.08   22.39  31 0.72976 0.01989 0.34165-0.59244 0.61113-0.80457
   2  -6  11   28.83   14.61  31 0.72964-0.66758 0.34168-0.71926 0.61125 0.17481
 -10   0  11  -13.73   17.02  31 0.72952-0.91978 0.34172-0.34209 0.61137 0.16817
 -11   1  11    8.07   17.27  31 0.72952-0.94079 0.34172-0.27917 0.61137 0.16762
  12   0  -3 1291.72   37.19  31 0.72929-0.48289 0.34178-0.34161 0.61161-0.81866
   9  -1  -2  874.61   25.35  31 0.72917-0.54388 0.34182-0.40452 0.61173-0.74921
 -13   3   8  183.57   16.95  31 0.72917-0.98791 0.34182-0.15341 0.61173-0.04812
  30  -2  -4  328.92   21.02  31 0.72882-0.10680 0.34192-0.46718 0.61210-0.88019
  -9   3   3  385.25   15.33  31 0.72870-0.91235 0.34195-0.15347 0.61222-0.40331
  -1  -5  11   27.04   13.74  31 0.72847-0.72946 0.34202-0.65678 0.61246 0.17196
  21   7  -5   60.55   11.77  31 0.72811-0.29668 0.34212 0.09777 0.61283-0.95740
  23  -1  -4  355.25   18.88  31 0.72788-0.25262 0.34218-0.40473 0.61307-0.88516
  27  -5  -2  311.56   18.18  31 0.72764-0.16480 0.34225-0.65600 0.61332-0.74061
  -4  -4   7  272.93   13.33  31 0.72753-0.79879 0.34228-0.59400 0.61344-0.11625
 -12   6   5  117.95   12.02  31 0.72741-0.97057 0.34232 0.03481 0.61356-0.26360
  15   9  -4   90.06    8.55  31 0.72741-0.42000 0.34232 0.22324 0.61356-0.89033
  -9   1   4  237.88   13.17  31 0.72670-0.90852 0.34252-0.27981 0.61429-0.33400
 -10  10   5  148.12   13.40  31 0.72670-0.92787 0.34252 0.28621 0.61429-0.26323
   9   9  -3   68.10    5.51  31 0.72647-0.54312 0.34258 0.22302 0.61453-0.82344
   2  -6   6   37.90    6.08  31 0.72647-0.67349 0.34258-0.71989 0.61453-0.18539
  -6   6   1 2369.46   61.97  31 0.72623-0.85052 0.34265 0.03447 0.61477-0.54690
  29   1  -5  104.31   17.10  31 0.72623-0.12704 0.34265-0.27954 0.61477-0.95469
 -11   5   4 1338.95   39.41  31 0.72611-0.94999 0.34268-0.02845 0.61489-0.33574
  -8   6   2  355.93   13.43  31 0.72600-0.89046 0.34272 0.03440 0.61502-0.47691
 -13   3  10   92.18   17.32  31 0.72588-0.98105 0.34275-0.15437 0.61514 0.09132
  18  -2  -3  561.97   20.77  31 0.72588-0.35362 0.34275-0.46816 0.61514-0.81878
  -9  11   5   21.95   11.87  31 0.72576-0.90593 0.34278 0.34884 0.61526-0.26365
  -8  -2  10   87.94   14.54  31 0.72553-0.87547 0.34285-0.46897 0.61550 0.09369
 -12   2  11  -14.75   16.36  31 0.72553-0.95779 0.34285-0.21739 0.61550 0.16293
  23  -3  -3  185.85   13.94  31 0.72541-0.24828 0.34288-0.53102 0.61562-0.81639
  15  -3  -2  530.62   18.68  31 0.72541-0.41423 0.34288-0.53116 0.61562-0.74970
  -8   0   4 2702.88   71.82  31 0.72529-0.88605 0.34292-0.34307 0.61574-0.33489
  32  -2  -4   86.75   17.89  31 0.72517-0.06123 0.34295-0.46818 0.61586-0.88281
  -9  -1  11    5.65   14.51  31 0.72517-0.89431 0.34295-0.40619 0.61586 0.16420
   8   8  -3   59.57    5.10  31 0.72470-0.56232 0.34308 0.15968 0.61635-0.82580
  30  -8   1   75.88   14.18  31 0.72458-0.09326 0.34312-0.84534 0.61647-0.52828
 -10   0   6   89.97    9.81  31 0.72446-0.92368 0.34315-0.34338 0.61659-0.19412
 -11   1   6  295.42   14.59  31 0.72446-0.94468 0.34315-0.28049 0.61659-0.19467
  13   7  -4   81.09    8.40  31 0.72364-0.45817 0.34338 0.09653 0.61744-0.89530
  36  -2  -4  -37.76   16.81  31 0.72352 0.02425 0.34341-0.46857 0.61756-0.88216
  34  -2  -4  111.26   16.19  31 0.72352-0.01766 0.34341-0.46863 0.61756-0.88338
   7   5  -3   55.41    5.67  31 0.72340-0.58197 0.34345-0.02918 0.61768-0.82764
  21  -9   4  117.35    9.12  31 0.72340-0.27526 0.34345-0.90880 0.61768-0.32064
  -1  -5   6   71.10    7.43  31 0.72328-0.73332 0.34348-0.65797 0.61780-0.19032
  -5  -3  12    5.16   14.80  31 0.72316-0.80643 0.34351-0.53258 0.61792 0.23576
  26  -6  -1   44.30   10.03  31 0.72293-0.17919 0.34358-0.72015 0.61816-0.67474
  17   1  -4  232.05   11.65  31 0.72293-0.37351 0.34358-0.28055 0.61816-0.89366
 -12   4   5  237.95   12.60  31 0.72233-0.96546 0.34374-0.09241 0.61877-0.26881
  23   3  -5  109.64   10.71  32 0.72221-0.24882 0.34377-0.15510 0.61889-0.96224
 -13   3   7  135.41   11.72  32 0.72221-0.98268 0.34377-0.15535 0.61889-0.12668
  21   5  -5   40.32    8.65  32 0.72186-0.29040 0.34387-0.02960 0.61925-0.96372
 -11   9   5   53.00    9.90  32 0.72186-0.94401 0.34387 0.22195 0.61925-0.26874
  31   1  -5   24.39   12.81  32 0.72174-0.08063 0.34391-0.28078 0.61937-0.95816
  -8  -2   7   67.95    8.49  32 0.72138-0.87675 0.34400-0.47003 0.61973-0.12476
  20  -4  -2   17.31    7.31  32 0.72115-0.30510 0.34407-0.59510 0.61997-0.75122
 -14   6   9   43.91   13.59  32 0.72067-0.99865 0.34420 0.03294 0.62045 0.01402
  14   8  -4  144.71    9.90  32 0.72055-0.43411 0.34423 0.15850 0.62057-0.89787
 -11  11   8   -0.27   16.40  32 0.72032-0.93717 0.34430 0.34744 0.62082-0.05612
  29  -5  -2   71.33   13.74  32 0.72032-0.11553 0.34430-0.65796 0.62082-0.74691
 -12  10   8   41.05   15.21  32 0.72032-0.95815 0.34430 0.28451 0.62082-0.05667
   5  -1  -1  106.20   14.78  32 0.72032-0.61716 0.34430-0.40707 0.62082-0.68928
  27  -7   0  263.89   16.31  32 0.72020-0.15363 0.34433-0.78370 0.62094-0.60565
  15  -1  -3 1006.48   30.26  32 0.72020-0.41088 0.34433-0.40696 0.62094-0.82630
  20   0  -4  108.11   10.35  32 0.72008-0.30773 0.34436-0.34411 0.62106-0.89482
  26   2  -5  179.65   15.13  32 0.71984-0.18354 0.34443-0.21853 0.62130-0.96289
 -10   2   4   40.16    8.62  32 0.71984-0.92265 0.34443-0.21884 0.62130-0.34157
  18  -6   0  169.18   10.61  32 0.71972-0.34191 0.34446-0.72120 0.62142-0.61122
 -11   7   4  115.08   10.96  32 0.71924-0.94321 0.34459 0.09543 0.62190-0.34278
  33   1  -5  145.04   22.10  32 0.71924-0.03622 0.34459-0.28145 0.62190-0.95951
 -14   6   8   28.53   13.96  32 0.71913-0.99893 0.34463 0.03251 0.62202-0.05897
  22   4  -5  129.91   13.06  32 0.71913-0.26670 0.34463-0.09315 0.62202-0.96592
  19  -7   1  155.00   10.09  32 0.71829-0.31766 0.34485-0.78444 0.62286-0.54082
 -12   2   6  198.36   14.03  32 0.71829-0.95957 0.34485-0.21932 0.62286-0.20150
  39  -5  -2  285.99   29.97  32 0.71805 0.09632 0.34492-0.65850 0.62310-0.74362
  -4  -4  11   32.79   14.14  32 0.71781-0.78187 0.34498-0.59690 0.62334 0.15945
 -13   3  11   -6.84   18.33  32 0.71781-0.97111 0.34498-0.15661 0.62334 0.15454
  12  -2  -2  111.65    9.31  32 0.71781-0.46959 0.34498-0.47048 0.62334-0.75912
  -3   3   0 6454.90  162.33  32 0.71769-0.78073 0.34502-0.15648 0.62346-0.62518
 -13   9   9  -44.32   18.85  32 0.71758-0.97461 0.34505 0.22086 0.62358 0.01144
 -14   6  10   23.21   18.70  32 0.71746-0.99361 0.34508 0.03206 0.62370 0.08220
  -6  10   2    8.57    6.77  32 0.71734-0.83988 0.34511 0.28353 0.62382-0.48465
   5  -7  11    5.66   12.47  32 0.71734-0.59224 0.34511-0.78553 0.62382 0.16387
  -9  -1   6   61.25   10.01  32 0.71734-0.89548 0.34511-0.40821 0.62382-0.20078
 -13   7   6   33.71   12.59  32 0.71710-0.97950 0.34518 0.09486 0.62406-0.20328
 -14   4   9   59.08   15.27  32 0.71698-0.99492 0.34521-0.09390 0.62418 0.01029
  -8   4   2  228.23   11.23  32 0.71662-0.88109 0.34531-0.09394 0.62454-0.48643
  25  -1  -4   33.63   13.50  32 0.71614-0.19896 0.34544-0.40796 0.62502-0.89596
 -13   9   8   64.12   18.43  32 0.71590-0.97474 0.34550 0.22039 0.62526-0.06166
  31  -5  -2   92.34   16.45  32 0.71578-0.06908 0.34553-0.65918 0.62538-0.75036
  -8  -2  11   52.24   16.50  32 0.71554-0.86365 0.34560-0.47175 0.62561 0.15498
 -14   4   8    2.91   13.50  32 0.71506-0.99484 0.34573-0.09442 0.62609-0.06305
  37  -5  -2  181.04   24.05  32 0.71494 0.05751 0.34576-0.65937 0.62621-0.74786
  13   5  -4  551.65   18.68  32 0.71458-0.44909 0.34586-0.03159 0.62657-0.90438
  13  -5   0  309.53   11.72  32 0.71458-0.44169 0.34586-0.65987 0.62657-0.61921
  28  -6  -1  306.08   18.19  32 0.71410-0.12844 0.34598-0.72250 0.62705-0.68246
  22   6  -5  191.58   14.51  32 0.71386-0.26145 0.34605 0.03103 0.62729-0.97123
 -14   4  10   49.00   17.88  32 0.71386-0.98999 0.34605-0.09475 0.62729 0.07861
  33  -5  -2  106.93   18.43  32 0.71350-0.02488 0.34615-0.65974 0.62765-0.75147
  -7  -3   9    7.77   11.73  32 0.71350-0.84416 0.34615-0.53508 0.62765 0.01066
 -11  11   7   11.75   17.20  32 0.71338-0.93194 0.34618 0.34550 0.62776-0.13448
  35  -5  -2  113.96   21.33  32 0.71338 0.01715 0.34618-0.65981 0.62776-0.75053
  25  -3  -3  727.45   27.30  32 0.71326-0.19421 0.34621-0.53430 0.62788-0.82749
 -12  10   7  -28.26   14.99  32 0.71326-0.95289 0.34621 0.28258 0.62788-0.13516
 -10   6   3  255.73   12.42  32 0.71314-0.91783 0.34624 0.03088 0.62800-0.41967
  -6   4   1  518.61   15.83  32 0.71302-0.83727 0.34627-0.09490 0.62812-0.56023
  -7  -1   4  294.24   13.18  32 0.71290-0.85267 0.34631-0.40934 0.62824-0.34684
  -7   9   2   71.01    7.96  32 0.71290-0.85641 0.34631 0.21945 0.62824-0.48960
  29  -7   0  168.44   15.57  32 0.71254-0.10405 0.34640-0.78577 0.62860-0.61222
  22  -8   2  151.87   10.81  32 0.71242-0.24701 0.34643-0.84883 0.62872-0.47371
  28   2  -5   31.08   14.95  32 0.71230-0.13408 0.34647-0.22056 0.62884-0.96929
  19  -5  -1   84.53   10.00  32 0.71206-0.31513 0.34653-0.66041 0.62908-0.68960
  23   7  -5   48.23   12.79  32 0.71194-0.23856 0.34656 0.09332 0.62919-0.97255
  -5  11   2   42.88    7.53  32 0.71182-0.81337 0.34659 0.34493 0.62931-0.48959
 -14   6   7   45.63   13.32  32 0.71170-0.99326 0.34663 0.03051 0.62943-0.13780
  -9  -1  12   59.34   20.49  32 0.71134-0.87863 0.34672-0.40999 0.62979 0.22169
 -12   8   5   62.81   11.60  32 0.71098-0.95417 0.34682 0.15612 0.63015-0.28022
  -7  -3   8  245.00   15.29  32 0.71085-0.84335 0.34685-0.53577 0.63026-0.06336
  25   3  -5  428.91   21.31  32 0.71061-0.19529 0.34691-0.15822 0.63050-0.97268
  21  11  -4    9.18   12.69  32 0.71049-0.27723 0.34694 0.34422 0.63062-0.90398
 -14   6  11   35.56   22.38  32 0.71025-0.98458 0.34701 0.03013 0.63086 0.14647
  18  10  -4   27.19    9.11  32 0.71013-0.33979 0.34704 0.28132 0.63098-0.90603
  14  -4  -1 1211.59   34.58  32 0.71001-0.41796 0.34707-0.59819 0.63110-0.69443
  16   2  -4 1676.39   47.47  32 0.71001-0.38157 0.34707-0.22124 0.63110-0.90715
  -1  -5  12   20.19   16.87  32 0.70989-0.70903 0.34710-0.66189 0.63122 0.22461
  -8  10   3   79.80    9.65  32 0.70989-0.87261 0.34710 0.28156 0.63122-0.42180
  -4  10   1  131.32    7.25  32 0.70941-0.79174 0.34723 0.28138 0.63169-0.56274
 -14   8   9   22.36   17.79  32 0.70941-0.98738 0.34723 0.15574 0.63169 0.00277
  -7  -3  10   60.30   13.05  32 0.70928-0.83813 0.34726-0.53624 0.63181 0.07791
  38  -6  -1   45.94   26.49  32 0.70880 0.08647 0.34739-0.72378 0.63228-0.68209
 -13   9   7   12.40   13.92  32 0.70844-0.96905 0.34748 0.21839 0.63264-0.14047
  30  -6  -1  118.37   15.59  32 0.70844-0.08085 0.34748-0.72399 0.63264-0.68694
  11   1  -3 2415.10   64.38  32 0.70807-0.48268 0.34758-0.28460 0.63299-0.84062
  31  -7   0   66.05   16.31  32 0.70795-0.05754 0.34761-0.78696 0.63311-0.61561
  27  -1  -4   48.18   14.10  32 0.70735-0.14823 0.34777-0.41023 0.63370-0.90343
  30   2  -5  149.02   18.30  32 0.70723-0.08709 0.34780-0.22188 0.63382-0.97312
  -5  -3   5  746.98   22.90  32 0.70723-0.80312 0.34780-0.53658 0.63382-0.27994
 -14   8   8   38.09   15.91  32 0.70711-0.98686 0.34783 0.15513 0.63394-0.07090
 -14   4   7   77.16   14.41  32 0.70698-0.98848 0.34786-0.09654 0.63406-0.14242
  -7  11   3  173.09   11.77  32 0.70686-0.84863 0.34789 0.34367 0.63418-0.42423
 -14   8  10  -39.07   20.39  32 0.70686-0.98308 0.34789 0.15510 0.63418 0.07172
 -13   3   6  213.53   15.26  32 0.70686-0.96912 0.34789-0.15946 0.63418-0.21338
  23   5  -5   88.33   13.54  32 0.70686-0.23349 0.34789-0.03362 0.63418-0.97756
 -14   4  11   -8.15   20.47  32 0.70662-0.98093 0.34796-0.09667 0.63441 0.14291
  35  -7   0   46.08   20.87  32 0.70626 0.02801 0.34805-0.78730 0.63477-0.61499
  24   4  -5   27.03   13.53  32 0.70601-0.21166 0.34812-0.09663 0.63500-0.97776
  -5   9   1  338.49   12.17  32 0.70601-0.80931 0.34812 0.21761 0.63500-0.56659
  33  -7   0   87.14   18.03  32 0.70589-0.01355 0.34815-0.78739 0.63512-0.61644
 -11   3   4  535.65   19.76  32 0.70589-0.92975 0.34815-0.15969 0.63512-0.35598
  36  -6  -1   86.83   20.29  32 0.70589 0.04747 0.34815-0.72459 0.63512-0.68607
  13  11  -3   23.30    5.85  32 0.70577-0.43849 0.34818 0.34307 0.63524-0.84187
  32  -6  -1  205.14   19.31  32 0.70541-0.03589 0.34827-0.72475 0.63559-0.68878
  26   8  -5   47.98   17.91  32 0.70516-0.16890 0.34834 0.15435 0.63583-0.97756
   8  -8   8   30.78    6.48  32 0.70504-0.52240 0.34837-0.85140 0.63595-0.06077
 -10   4   3  583.68   20.12  32 0.70492-0.90957 0.34840-0.09704 0.63607-0.42773
  20  -2  -3  539.22   20.73  32 0.70480-0.29059 0.34843-0.47378 0.63618-0.83864
  -9   9   3   62.66    9.66  32 0.70468-0.88842 0.34846 0.21733 0.63630-0.42745
  34  -6  -1  123.81   19.28  32 0.70468 0.00676 0.34846-0.72493 0.63630-0.68838
  27  -3  -3  156.47   16.17  32 0.70443-0.14346 0.34852-0.53660 0.63654-0.83502
  32   2  -5   42.19   20.22  32 0.70431-0.04225 0.34855-0.22261 0.63666-0.97476
  14   4  -4   49.77    8.63  32 0.70419-0.41772 0.34859-0.09713 0.63677-0.91399
  22   0  -4  101.12   13.37  32 0.70382-0.24955 0.34868-0.34841 0.63713-0.90974
   0  -6   9   30.78    9.41  32 0.70346-0.68703 0.34877-0.72628 0.63748 0.00467
  -4  -4   6   70.62    7.75  32 0.70321-0.77630 0.34884-0.60053 0.63771-0.21191
  15   3  -4  324.29   14.51  32 0.70321-0.39575 0.34884-0.16019 0.63771-0.91433
  22  -4  -2   52.54   11.72  32 0.70321-0.24522 0.34884-0.59982 0.63771-0.76779
  27   3  -5  163.03   16.68  32 0.70211-0.14487 0.34912-0.16042 0.63877-0.97982
  -4  -4  12  -25.06   16.37  32 0.70163-0.76379 0.34924-0.60116 0.63924 0.21494
  -8  -2  12   -0.89   17.15  32 0.70150-0.84779 0.34927-0.47546 0.63936 0.21266
  29  -1  -4  274.23   18.97  32 0.70138-0.10034 0.34930-0.41175 0.63948-0.90807
  -4  -2   3  344.53   11.73  32 0.70126-0.77980 0.34933-0.47517 0.63959-0.42786
  -8  -2   6   87.86    9.98  32 0.70101-0.85816 0.34940-0.47538 0.63983-0.21625
 -13   1   9    1.84   12.33  32 0.70089-0.95776 0.34943-0.28686 0.63995-0.00494
   8  -8  10   -5.60   10.52  32 0.70077-0.51447 0.34946-0.85263 0.64006 0.07786
 -12   0   9  -25.05   12.58  32 0.70077-0.93661 0.34946-0.34979 0.64006-0.00451
  -3  -5   9   16.59   10.20  32 0.70077-0.74736 0.34946-0.66412 0.64006 0.00044
  19   1  -4  338.37   15.25  32 0.70052-0.30916 0.34952-0.28647 0.64030-0.91462
  24   6  -5   80.25   13.87  32 0.70040-0.20607 0.34955 0.02753 0.64042-0.98321
 -15   5   9   36.59   13.71  32 0.70028-0.99918 0.34958-0.03536 0.64053-0.00663
  25   7  -5   93.79   13.70  32 0.69991-0.18462 0.34967 0.09021 0.64088-0.98316
  -7  -3  11   53.16   13.59  32 0.69979-0.82680 0.34971-0.53871 0.64100 0.14012
  16  12  -3   41.85    9.26  32 0.69967-0.36946 0.34974 0.40432 0.64112-0.84606
  -3  11   1   45.82    6.35  32 0.69893-0.76025 0.34992 0.34155 0.64182-0.57231
  -7  -3   7  155.92   10.64  32 0.69881-0.83313 0.34995-0.53885 0.64194-0.14643
 -13   5   5  117.42    9.96  32 0.69881-0.96291 0.34995-0.03572 0.64194-0.29254
 -11  11   6   31.01   12.84  32 0.69881-0.91913 0.34995 0.34169 0.64194-0.22006
 -14   8   7   50.85   10.43  32 0.69869-0.98031 0.34998 0.15298 0.64205-0.15045
 -12  10   6   69.76   12.02  32 0.69869-0.94010 0.34998 0.27878 0.64205-0.22075
   0  -6   8  122.54   10.59  32 0.69869-0.68408 0.34998-0.72745 0.64205-0.07129
 -13   1  10   86.47   12.92  32 0.69856-0.95362 0.35001-0.28746 0.64217 0.06425
   0  -6  10   24.62   11.18  32 0.69844-0.68019 0.35004-0.72760 0.64229 0.07125
  29  -3  -3  248.71   15.70  32 0.69844-0.09555 0.35004-0.53811 0.64229-0.83965
 -12   0  10   21.84   11.60  32 0.69832-0.93235 0.35008-0.35043 0.64241 0.06457
  -8   8   2   49.10    7.65  32 0.69832-0.86280 0.35008 0.15280 0.64241-0.50432
 -15   5  10    0.99   12.82  32 0.69819-0.99539 0.35011-0.03589 0.64252 0.06281
  31  -1  -4   77.31   13.05  33 0.69783-0.05487 0.35020-0.41265 0.64287-0.91036
 -13   1   8    6.50    9.54  33 0.69758-0.95618 0.35026-0.28765 0.64311-0.07952
 -12   0   8   15.00    9.42  33 0.69733-0.93492 0.35032-0.35061 0.64334-0.07920
 -11   1   5  143.98    9.63  33 0.69721-0.91919 0.35035-0.28767 0.64346-0.29292
   8   4  -3   64.89    6.22  33 0.69709-0.53468 0.35038-0.09895 0.64357-0.85295
 -15   5   8   34.99   10.77  33 0.69709-0.99783 0.35038-0.03616 0.64357-0.08109
 -15   7   9   45.19   14.10  33 0.69684-0.99585 0.35044 0.08961 0.64381-0.00991
  -3  -5  10   50.30   11.43  33 0.69672-0.74152 0.35047-0.66521 0.64392 0.06798
  35  -1  -4  199.24   19.03  33 0.69660 0.03019 0.35050-0.41289 0.64404-0.90918
 -14   6   6   66.33   11.22  33 0.69647-0.97977 0.35054 0.02659 0.64416-0.22393
  37  -3  -3   94.81   19.52  33 0.69635 0.07422 0.35057-0.53854 0.64427-0.83710
 -14   2   9   17.48   11.68  33 0.69635-0.97421 0.35057-0.22509 0.64427-0.00982
  33  -1  -4  238.21   18.46  33 0.69635-0.01148 0.35057-0.41301 0.64427-0.91064
  29   3  -5   71.98   13.64  33 0.69623-0.09706 0.35060-0.16188 0.64439-0.98423
  26   4  -5  196.24   15.66  33 0.69623-0.15995 0.35060-0.09911 0.64439-0.98599
  -3  -5   8   11.52    8.69  33 0.69610-0.74452 0.35063-0.66525 0.64451-0.07540
  -4  12   2   21.95    7.90  33 0.69549-0.77602 0.35078 0.40361 0.64509-0.50481
  -6  12   3   30.69    9.75  33 0.69549-0.81621 0.35078 0.40365 0.64509-0.43457
 -10   0   5  543.70   19.52  33 0.69536-0.89637 0.35081-0.35102 0.64520-0.29413
 -11  -1   9   27.08   12.02  33 0.69536-0.91014 0.35081-0.41403 0.64520-0.00911
 -15   7  10   19.75   18.67  33 0.69512-0.99230 0.35087 0.08919 0.64544 0.05989
  14   6  -4   33.11    7.89  33 0.69512-0.40867 0.35087 0.02622 0.64544-0.92269
  17  -3  -2  147.03   10.43  33 0.69512-0.34200 0.35087-0.53912 0.64544-0.77836
  31  -3  -3  281.64   19.53  33 0.69487-0.05005 0.35093-0.53896 0.64567-0.84187
 -14   2  10    8.84   15.02  33 0.69438-0.97049 0.35105-0.22560 0.64613 0.05974
 -10  10   4  115.24   12.19  33 0.69438-0.89732 0.35105 0.27765 0.64613-0.36648
  -2  -2   2  401.52   11.93  33 0.69425-0.73259 0.35108-0.47686 0.64625-0.50473
  35  -3  -3   74.74   19.71  33 0.69413 0.03452 0.35112-0.53911 0.64637-0.84033
 -13   7   5  127.73   12.71  33 0.69401-0.95815 0.35115 0.08888 0.64648-0.29711
 -12   6   4  203.85   12.75  33 0.69388-0.93877 0.35118 0.02595 0.64660-0.36803
  10   2  -3  487.25   16.93  33 0.69363-0.48924 0.35124-0.22544 0.64683-0.85503
  20  -6   0  164.62   11.27  33 0.69363-0.27389 0.35124-0.72795 0.64683-0.63550
 -15   7   8   28.28   14.08  33 0.69351-0.99433 0.35127 0.08878 0.64695-0.08448
  33  -3  -3  282.49   21.38  33 0.69351-0.00678 0.35127-0.53926 0.64695-0.84200
 -13   9   6   51.54   12.99  33 0.69339-0.95574 0.35130 0.21454 0.64706-0.22630
 -11  -1  10   45.72   15.89  33 0.69314-0.90612 0.35136-0.41461 0.64730 0.06022
  24  -8   2   75.66   10.66  33 0.69314-0.18579 0.35136-0.85372 0.64730-0.49116
  -9  11   4   25.47   10.74  33 0.69314-0.87505 0.35136 0.34022 0.64730-0.36708
  17   9  -4   63.70    9.39  33 0.69289-0.34352 0.35142 0.21412 0.64753-0.92309
   5  -7   6  128.44    6.21  33 0.69289-0.57690 0.35142-0.79152 0.64753-0.21673
  31   3  -5   14.05   17.60  33 0.69277-0.05168 0.35145-0.16273 0.64764-0.98633
 -14   2   8   74.84   15.09  33 0.69265-0.97232 0.35148-0.22599 0.64776-0.08473
  21  -7   1  279.25   13.60  33 0.69252-0.24995 0.35151-0.79106 0.64788-0.56470
  14  -6   1  823.32   23.88  33 0.69227-0.39656 0.35157-0.72843 0.64811-0.56888
  17  -1  -3  570.61   20.90  33 0.69190-0.34064 0.35166-0.41426 0.64846-0.85264
 -12   2   5  681.31   23.98  33 0.69165-0.93466 0.35172-0.22616 0.64869-0.29872
 -13   1  11   75.49   18.27  33 0.69153-0.94482 0.35175-0.28924 0.64880 0.12905
 -10   8   3  111.49   10.16  33 0.69141-0.89612 0.35178 0.15111 0.64892-0.44062
  24   0  -4  690.73   26.46  33 0.69141-0.19521 0.35178-0.35150 0.64892-0.92040
 -11  -1   8   32.44   13.74  33 0.69128-0.90781 0.35181-0.41498 0.64903-0.08434
  27   7  -5  -23.89   16.41  33 0.69116-0.13393 0.35184 0.08804 0.64915-0.99024
 -12   0  11  -29.89   17.60  33 0.69103-0.92325 0.35187-0.35226 0.64927 0.12913
  21  -5  -1  207.26   13.25  33 0.69103-0.25218 0.35187-0.66572 0.64927-0.70866
   8   0  -2 2707.93   70.46  33 0.69103-0.52677 0.35187-0.35176 0.64927-0.78733
  14   0  -3  131.06   11.02  33 0.69079-0.40246 0.35193-0.35175 0.64950-0.85541
  26   6  -5   44.90   15.31  33 0.69054-0.15428 0.35199 0.02509 0.64973-0.99141
 -14   4   6   56.22   12.60  33 0.69041-0.97373 0.35202-0.10070 0.64984-0.22963
  -4   6   0 1759.85   45.66  33 0.69041-0.77448 0.35202 0.02509 0.64984-0.65216
  24  -4  -2   57.45   12.99  33 0.68967-0.18974 0.35220-0.60313 0.65054-0.77945
  28   4  -5  129.50   16.75  33 0.68942-0.11123 0.35226-0.10077 0.65077-0.99125
  11  -3  -1  279.03   11.90  33 0.68917-0.46010 0.35232-0.54068 0.65100-0.71605
   3  -7   9   38.59    8.63  33 0.68905-0.60958 0.35235-0.79268 0.65111-0.00732
   3   5  -2  545.92   14.86  33 0.68905-0.62977 0.35235-0.03809 0.65111-0.79207
   9   3  -3  367.35   13.44  33 0.68880-0.50540 0.35241-0.16380 0.65135-0.86014
 -11   9   4    2.26    9.71  33 0.68880-0.91271 0.35241 0.21339 0.65135-0.37224
  -6   8   1   83.44    6.06  33 0.68880-0.81307 0.35241 0.15044 0.65135-0.58348
  22  -2  -3  150.12   13.25  33 0.68855-0.23243 0.35247-0.47783 0.65158-0.85294
 -14   2  11   -9.80   18.46  33 0.68793-0.96217 0.35262-0.22717 0.65215 0.12514
 -15   5   7  115.50   15.43  33 0.68743-0.99000 0.35274-0.03852 0.65261-0.16156
 -15   3   9   47.56   16.56  33 0.68743-0.98637 0.35274-0.16437 0.65261-0.01872
  27   5  -5  113.87   17.14  33 0.68730-0.13008 0.35277-0.03849 0.65273-0.99382
  -6  -4   9   19.27   11.10  33 0.68680-0.79642 0.35289-0.60471 0.65319-0.01435
 -13   1   7  308.56   17.50  33 0.68680-0.94720 0.35289-0.29026 0.65319-0.16100
   0  -6  11   86.00   15.57  33 0.68643-0.66636 0.35298-0.73061 0.65353 0.13141
  -3  -5  11   25.42   14.30  33 0.68643-0.72936 0.35298-0.66773 0.65353 0.12976
 -15   3  10   60.26   19.31  33 0.68618-0.98331 0.35304-0.16467 0.65376 0.05155
 -12   0   7  101.70   13.00  33 0.68605-0.92542 0.35307-0.35333 0.65388-0.16114
 -12   4   4  203.20   13.11  33 0.68593-0.93077 0.35310-0.10176 0.65399-0.37541
 -11  -1  11   58.90   17.26  33 0.68580-0.89699 0.35313-0.41642 0.65411 0.12483
  -7  -3  12   49.63   19.11  33 0.68580-0.81101 0.35313-0.54219 0.65411 0.19843
  -6  -2   4 2812.14   73.86  33 0.68568-0.80441 0.35316-0.47905 0.65422-0.37227
  18   2  -4  237.49   13.77  33 0.68543-0.31506 0.35322-0.22737 0.65445-0.92936
   8  -2  -1  453.46   14.56  33 0.68543-0.51932 0.35322-0.47879 0.65445-0.72121
  30   4  -5  194.16   20.62  33 0.68518-0.06507 0.35328-0.10178 0.65468-0.99404
  15   7  -4   31.93    8.11  33 0.68505-0.37763 0.35331 0.08660 0.65480-0.93147
  20  10  -4  241.56   14.92  33 0.68493-0.27265 0.35334 0.27501 0.65491-0.92879
  10  -6   2  249.02    8.28  33 0.68480-0.47118 0.35337-0.73033 0.65503-0.50674
   3  -7  10   -3.21    9.94  33 0.68480-0.60350 0.35337-0.79373 0.65503 0.06015
  -9  -1   5  140.86   10.99  33 0.68468-0.86464 0.35340-0.41648 0.65514-0.30351
  -6  -4  10   27.04   13.45  33 0.68455-0.79238 0.35342-0.60531 0.65526 0.05499
  16   8  -4    4.95    8.08  33 0.68443-0.35603 0.35345 0.14927 0.65537-0.93148
 -15   7   7  -11.58   13.09  33 0.68393-0.98651 0.35357 0.08647 0.65583-0.16478
 -10  -2   9  -18.13   13.69  33 0.68368-0.87740 0.35363-0.47974 0.65606-0.01942
  28   6  -5  -31.98   16.95  33 0.68368-0.10549 0.35363 0.02345 0.65606-0.99656
 -15   3   8   10.76   13.55  33 0.68318-0.98387 0.35375-0.16535 0.65652-0.09405
  21   1  -4  408.90   18.82  33 0.68293-0.24963 0.35381-0.29073 0.65674-0.92989
 -14   8   6   21.62   13.70  33 0.68255-0.96591 0.35390 0.14904 0.65709-0.23689
   1  -5   4   77.35    4.25  33 0.68242-0.65409 0.35393-0.66830 0.65720-0.37132
  26   0  -4   23.44   13.58  33 0.68230-0.14418 0.35396-0.35366 0.65732-0.92765
 -10  -2  10    3.17   13.79  33 0.68217-0.87411 0.35399-0.48013 0.65743 0.05062
  40  -4  -2   23.52   29.78  33 0.68217 0.15311 0.35399-0.60472 0.65743-0.77731
  29   5  -5   73.83   19.05  33 0.68192-0.08278 0.35404-0.03976 0.65766-0.99760
 -14   2   7  107.40   14.28  33 0.68180-0.96326 0.35407-0.22857 0.65777-0.16616
  -6  -4   8   56.66   10.78  33 0.68079-0.79225 0.35431-0.60611 0.65869-0.09125
   8   6  -3  814.43   23.06  33 0.68066-0.51827 0.35434 0.02276 0.65880-0.86819
   3  -7   8   37.75    6.94  33 0.68066-0.60301 0.35434-0.79460 0.65880-0.08639
 -13   1  12   22.86   21.45  33 0.68066-0.93201 0.35434-0.29181 0.65880 0.19046
 -15   3  11  -11.87   20.85  33 0.68041-0.97565 0.35440-0.16603 0.65903 0.11771
  26  -8   2  186.76   13.71  33 0.68003-0.13075 0.35448-0.85677 0.65937-0.50209
  26  -4  -2  771.33   28.51  33 0.68003-0.13819 0.35448-0.60541 0.65937-0.78717
  -9   5   2  617.78   20.01  33 0.68003-0.86547 0.35448-0.04025 0.65937-0.52183
 -13   3   5   77.93   11.29  33 0.67978-0.94384 0.35454-0.16611 0.65960-0.31021
 -16   6   9  -15.85   16.15  33 0.67978-0.99974 0.35454 0.02259 0.65960-0.02627
 -14  10   8   38.75   18.53  33 0.67928-0.95900 0.35466 0.27412 0.66005-0.09704
  10  -4   0  989.56   27.60  33 0.67915-0.46922 0.35469-0.60591 0.66017-0.65448
 -16   6  10   -3.10   19.41  33 0.67903-0.99725 0.35472 0.02242 0.66028 0.04448
  15   5  -4 1008.96   30.39  33 0.67903-0.37160 0.35472-0.04044 0.66028-0.93692
  -3  -5   7   66.29    8.38  33 0.67865-0.72886 0.35480-0.66938 0.66062-0.16290
 -11  -1   7   89.74   12.68  33 0.67865-0.89700 0.35480-0.41796 0.66062-0.16734
 -15   9   9    6.40   18.61  33 0.67852-0.97747 0.35483 0.21105 0.66074-0.02686
   0  -6   7   38.80    6.85  33 0.67840-0.66560 0.35486-0.73227 0.66085-0.16147
 -10  -2   8  106.96   13.26  33 0.67814-0.87368 0.35492-0.48100 0.66108-0.09585
 -14   2  12   45.06   21.07  33 0.67751-0.94991 0.35506-0.22963 0.66165 0.18708
  14  -2  -2 3348.90   88.02  33 0.67675-0.38658 0.35524-0.48069 0.66233-0.79693
  38  -4  -2  345.54   26.49  33 0.67650 0.11686 0.35530-0.60601 0.66255-0.78350
  24  -2  -3   74.45   11.65  33 0.67625-0.17820 0.35535-0.48068 0.66278-0.86297
  -6  -4  11  -22.13   14.84  33 0.67612-0.78215 0.35538-0.60732 0.66289 0.11876
 -12   8   4   78.49   10.74  33 0.67612-0.92107 0.35538 0.14753 0.66289-0.38436
  28   0  -4  174.35   15.51  33 0.67612-0.09608 0.35538-0.35507 0.66289-0.93209
  17   3  -4  378.42   16.00  33 0.67587-0.32648 0.35544-0.16678 0.66312-0.93860
  23  -5  -1   79.74   12.15  33 0.67524-0.19443 0.35558-0.66936 0.66369-0.72189
 -10  -2  11   68.92   15.36  33 0.67524-0.86530 0.35558-0.48174 0.66369 0.11578
 -16   6   8   63.67   13.48  33 0.67511-0.99689 0.35561 0.02151 0.66380-0.10190
 -11   5   3  622.86   20.73  33 0.67486-0.90052 0.35567-0.04144 0.66403-0.45627
 -16   4   9   29.34   11.49  33 0.67460-0.99452 0.35573-0.10444 0.66425-0.03093
 -11  -1  12    7.01   14.93  33 0.67422-0.88355 0.35581-0.41912 0.66459 0.18577
  22  -6   0 1994.64   55.56  33 0.67422-0.21254 0.35581-0.73247 0.66459-0.65211
 -16   4  10  -13.00   12.72  33 0.67422-0.99232 0.35581-0.10453 0.66459 0.04016
  16  -4  -1  681.60   21.59  33 0.67397-0.33998 0.35587-0.60696 0.66482-0.72700
  23  -7   1   98.28   10.77  33 0.67397-0.18946 0.35587-0.79538 0.66482-0.58051
 -15   9   8   42.30   14.64  33 0.67384-0.97467 0.35590 0.20999 0.66493-0.10248
 -12  10   5   59.27   10.45  33 0.67384-0.91696 0.35590 0.27282 0.66493-0.31502
  28  -4  -2  115.85   11.83  33 0.67359-0.08981 0.35596-0.60685 0.66516-0.79181
  16   4  -4 1258.77   36.53  33 0.67321-0.34479 0.35604-0.10458 0.66550-0.94154
  -9   7   2  585.70   19.24  34 0.67308-0.85856 0.35607 0.08392 0.66561-0.52810
  -7  -3   6  202.58   10.20  34 0.67282-0.80891 0.35613-0.54497 0.66583-0.24171
  30   0  -4   43.08   11.65  34 0.67244-0.05047 0.35622-0.35586 0.66617-0.93417
  36  -4  -2  153.60   17.44  34 0.67232 0.07914 0.35624-0.60702 0.66628-0.78840
   3  -7  11   13.35   13.28  34 0.67206-0.58893 0.35630-0.79674 0.66651 0.12006
  -2  12   1    6.65    5.86  34 0.67206-0.71238 0.35630 0.39804 0.66651-0.59645
  28  -8   2  134.82   14.53  34 0.67193-0.08072 0.35633-0.85858 0.66662-0.50822
  11  -1  -2 2449.55   64.59  34 0.67181-0.44458 0.35636-0.41903 0.66674-0.80305
 -15   3   7   79.39   10.98  34 0.67181-0.97428 0.35636-0.16795 0.66674-0.17568
  12  10  -3   78.61    7.24  34 0.67181-0.42552 0.35636 0.27207 0.66674-0.87392
  34   0  -4  530.66   25.02  34 0.67168 0.03412 0.35639-0.35603 0.66685-0.93264
  19  -3  -2  817.93   26.00  34 0.67155-0.27651 0.35641-0.54464 0.66696-0.79874
  32   0  -4  127.75   16.05  34 0.67104-0.00716 0.35653-0.35616 0.66741-0.93427
  -3  -5  12    5.50   15.59  34 0.67079-0.71193 0.35659-0.67142 0.66764 0.18707
 -14   6   5   53.55   10.73  34 0.67041-0.95551 0.35667 0.02045 0.66797-0.31916
  30  -4  -2  159.88   16.28  34 0.67002-0.04433 0.35676-0.60764 0.66831-0.79386
  19  -1  -3   30.45    9.54  34 0.66977-0.27658 0.35681-0.41939 0.66853-0.87159
  23   1  -4  395.03   19.08  34 0.66964-0.19442 0.35684-0.29376 0.66865-0.94067
  34  -4  -2  222.96   19.53  34 0.66964 0.03989 0.35684-0.60764 0.66865-0.79189
 -11   7   3  226.53   12.22  34 0.66964-0.89531 0.35684 0.08316 0.66865-0.46090
 -15   5   6   35.10   12.27  34 0.66939-0.97370 0.35690-0.04268 0.66887-0.24922
 -16   4   8   65.35   14.41  34 0.66939-0.99110 0.35690-0.10560 0.66887-0.10697
 -13  11   7   21.68   15.84  34 0.66939-0.92989 0.35690 0.33477 0.66887-0.17672
  15  -5   0  115.86    8.27  34 0.66926-0.35440 0.35693-0.67088 0.66898-0.66045
 -16   8   9   32.17   17.37  34 0.66926-0.98923 0.35693 0.14604 0.66898-0.03566
 -16   4  11   -7.30   19.68  34 0.66913-0.98547 0.35695-0.10568 0.66910 0.10709
  -2  -4   4  423.74   13.34  34 0.66913-0.70379 0.35695-0.60851 0.66910-0.38489
  32  -4  -2   63.75   15.98  34 0.66875-0.00113 0.35704-0.60786 0.66943-0.79380
 -14  10   7   10.35   15.42  34 0.66849-0.95010 0.35709 0.27169 0.66966-0.17808
 -13   9   5   44.76   11.75  34 0.66785-0.93196 0.35724 0.20858 0.67022-0.32085
  30  -8   2  166.25   15.95  34 0.66785-0.03470 0.35724-0.85949 0.67022-0.51071
  26  -2  -3  484.81   33.43  34 0.66747-0.12749 0.35732-0.48260 0.67055-0.86956
  19   9  -4  141.52   11.49  34 0.66708-0.27578 0.35740 0.20813 0.67089-0.94531
  38  -2  -3  140.32   27.67  34 0.66683 0.12466 0.35746-0.48263 0.67111-0.86335
  22  10  -4   80.70   13.05  34 0.66644-0.21223 0.35754 0.27080 0.67145-0.94418
  20   2  -4   81.78   12.17  34 0.66619-0.25388 0.35760-0.23173 0.67167-0.94539
 -15   7   6   90.74   13.64  34 0.66606-0.97044 0.35763 0.08240 0.67178-0.25216
 -13   1   6  162.04   13.78  34 0.66593-0.92816 0.35766-0.29503 0.67190-0.25112
  -1  -5   5   62.63    5.41  34 0.66593-0.67777 0.35766-0.67211 0.67190-0.31579
  13   1  -3  581.17   20.29  34 0.66542-0.39809 0.35777-0.29477 0.67234-0.87882
  -7   5   1 3369.18   86.93  34 0.66516-0.81041 0.35782-0.04358 0.67256-0.60525
  -9  -3   9   28.33   12.32  34 0.66439-0.83704 0.35799-0.54696 0.67323-0.03606
  -9  -3  10   72.72   14.28  34 0.66426-0.83514 0.35802-0.54706 0.67335 0.03524
  25  -5  -1  453.79   20.57  34 0.66414-0.14141 0.35805-0.67182 0.67346-0.73055
 -12   0   6 1333.12   40.28  34 0.66401-0.90517 0.35808-0.35832 0.67357-0.25223
 -16   8   8  152.47   19.39  34 0.66401-0.98571 0.35808 0.14487 0.67357-0.11167
 -16   6   7   62.70   14.00  34 0.66375-0.98733 0.35813 0.01899 0.67379-0.18331
 -10  -2  12   17.13   18.95  34 0.66362-0.85186 0.35816-0.48435 0.67390 0.17698
  -6  -4   7   33.25    8.84  34 0.66336-0.77658 0.35821-0.60994 0.67413-0.17807
 -10  -2   7   73.99   11.48  34 0.66324-0.86054 0.35824-0.48427 0.67424-0.18040
  16   6  -4  194.11   11.47  34 0.66285-0.33446 0.35833 0.01877 0.67457-0.95066
 -15   9   7   -2.27   14.82  34 0.66272-0.96532 0.35835 0.20751 0.67468-0.18366
  -6  -4  12   -8.85   18.05  34 0.66272-0.76688 0.35835-0.61031 0.67468 0.17838
  18  12  -3    6.52   10.02  34 0.66259-0.29043 0.35838 0.39565 0.67479-0.87857
  -8  -2   5  560.03   19.38  34 0.66246-0.82136 0.35841-0.48434 0.67490-0.32270
 -14   4   5  238.36   14.84  34 0.66233-0.94743 0.35844-0.10711 0.67501-0.32620
  36  -2  -3   49.42   21.91  34 0.66233 0.08724 0.35844-0.48361 0.67501-0.86834
  -9   1   3  427.10   16.00  34 0.66195-0.84554 0.35852-0.29580 0.67535-0.46645
  28  -2  -3  659.61   27.30  34 0.66182-0.07992 0.35855-0.48380 0.67546-0.87332
 -14   2   6  130.82   13.29  34 0.66143-0.94464 0.35863-0.23310 0.67579-0.25557
  25  -7   1    5.54   10.57  34 0.66118-0.13473 0.35868-0.79813 0.67601-0.59056
  24  -6   0 1236.28   37.87  34 0.66040-0.15678 0.35885-0.73546 0.67668-0.66305
  16   0  -3  106.60   11.17  34 0.66027-0.33000 0.35888-0.35866 0.67679-0.88153
   0  -4   3  736.98   19.80  34 0.66014-0.65464 0.35891-0.61040 0.67690-0.46292
 -13   5   4  581.30   21.50  34 0.66014-0.92603 0.35891-0.04468 0.67690-0.39891
  25   1  -4   11.43   12.73  34 0.66001-0.14288 0.35893-0.29584 0.67701-0.94791
  37  -5  -1   76.30   22.19  34 0.65950 0.11477 0.35904-0.67263 0.67745-0.72777
  34  -2  -3   82.66   19.48  34 0.65937 0.04829 0.35907-0.48426 0.67757-0.87203
  30  -2  -3  106.08   16.57  34 0.65885-0.03503 0.35918-0.48442 0.67801-0.87475
 -10   2   3  475.34   17.81  34 0.65872-0.86332 0.35921-0.23361 0.67812-0.46978
 -17   5  10  -59.56   19.37  34 0.65846-0.99763 0.35926-0.04506 0.67834 0.02585
  -7   1   2 4725.06  120.82  34 0.65833-0.80172 0.35929-0.29653 0.67845-0.53977
  32  -2  -3   24.59   16.25  34 0.65808 0.00766 0.35934-0.48454 0.67867-0.87423
  -9  -3  11   28.34   15.65  34 0.65808-0.82711 0.35934-0.54840 0.67867 0.10133
 -17   5   9   58.74   16.78  34 0.65782-0.99878 0.35940-0.04519 0.67889-0.04613
  18   8  -4    1.49    9.13  34 0.65717-0.28684 0.35953 0.14319 0.67944-0.95440
 -16   4   7   31.05   14.25  34 0.65717-0.98062 0.35953-0.10823 0.67944-0.18895
  -7   7   1  429.21   14.16  34 0.65704-0.80231 0.35956 0.08042 0.67955-0.61226
  -8   2   2  222.53   10.44  34 0.65704-0.82143 0.35956-0.23394 0.67955-0.54144
   7   1  -2 4680.35  119.35  34 0.65704-0.51378 0.35956-0.29663 0.67955-0.81818
  -4   4   0  376.69   10.95  34 0.65691-0.74094 0.35959-0.10820 0.67966-0.68196
  27  -5  -1  110.40   13.70  34 0.65678-0.09212 0.35962-0.67335 0.67977-0.73572
 -15   1  10   15.14   16.40  34 0.65652-0.95351 0.35967-0.29712 0.67999 0.02529
  -9  -3   8   22.17   11.45  34 0.65652-0.83096 0.35967-0.54859 0.67999-0.11422
 -13   7   4   77.87   11.20  34 0.65639-0.92227 0.35970 0.08031 0.68010-0.40211
 -17   7  10   90.15   23.07  34 0.65639-0.99550 0.35970 0.08035 0.68010 0.02408
  -3   9   0  463.67   13.81  34 0.65626-0.71935 0.35973 0.20598 0.68021-0.68201
  -2  10   0 1655.37   43.31  34 0.65600-0.69811 0.35978 0.26878 0.68044-0.68168
 -15   1   9   41.77   16.21  34 0.65574-0.95454 0.35983-0.29727 0.68066-0.04679
  17   7  -4   89.78    9.87  34 0.65561-0.30625 0.35986 0.08005 0.68077-0.95627
 -14   8   5   16.50   11.67  34 0.65561-0.94075 0.35986 0.14306 0.68077-0.33197
 -17   7   9   42.69   19.10  34 0.65561-0.99654 0.35986 0.08018 0.68077-0.04801
 -14   0  10   53.20   16.52  34 0.65561-0.93156 0.35986-0.36021 0.68077 0.02507
  15  11  -3   28.85    7.12  34 0.65522-0.34600 0.35994 0.33129 0.68110-0.88656
   7  -3   0 1739.28   45.24  34 0.65522-0.50826 0.35994-0.54838 0.68110-0.67711
  35  -5  -1    5.70   17.59  34 0.65496 0.07738 0.36000-0.67361 0.68132-0.73275
 -14   0   9  -35.96   15.08  34 0.65470-0.93252 0.36005-0.36040 0.68154-0.04712
   9   7  -3  729.10   21.16  34 0.65470-0.47134 0.36005 0.07988 0.68154-0.89036
  19   3  -4   31.40   10.17  34 0.65457-0.26325 0.36008-0.17141 0.68165-0.95594
 -17   5  11  -34.32   22.31  34 0.65444-0.99173 0.36010-0.04590 0.68176 0.09387
 -11  -1   6  332.20   15.96  34 0.65431-0.87442 0.36013-0.42324 0.68186-0.25997
  20  -8   3   32.36    7.14  34 0.65392-0.22863 0.36021-0.86267 0.68219-0.45698
  21  -3  -2  493.73   19.54  34 0.65366-0.21668 0.36027-0.54844 0.68241-0.81302
  27   1  -4   88.49   15.37  34 0.65353-0.09447 0.36029-0.29719 0.68252-0.95228
  -8   0   3   80.42    8.20  34 0.65340-0.81596 0.36032-0.36046 0.68263-0.47317
  24  10  -4    2.10   14.93  34 0.65327-0.15713 0.36035 0.26798 0.68274-0.95431
  27  -7   1   29.03   11.99  34 0.65314-0.08477 0.36037-0.79979 0.68285-0.59627
  21  -1  -3  212.29   13.78  34 0.65288-0.21776 0.36043-0.42299 0.68307-0.88498
 -16   2  10   28.96   17.18  34 0.65275-0.97085 0.36046-0.23502 0.68318 0.02155
  -4  -4   5  371.77   13.31  34 0.65275-0.72759 0.36046-0.61207 0.68318-0.32875
  17  -7   2   97.57    7.71  34 0.65223-0.29174 0.36056-0.80024 0.68362-0.53140
  33  -5  -1  197.18   18.57  34 0.65210 0.03833 0.36059-0.67422 0.68373-0.73628
 -15   1  11   18.76   17.71  34 0.65210-0.94725 0.36059-0.29805 0.68373 0.09298
 -16   8   7    8.36   14.14  34 0.65197-0.97548 0.36062 0.14232 0.68384-0.19336
 -16   2   9   16.75   14.93  34 0.65171-0.97161 0.36067-0.23522 0.68406-0.05075
[truncated: 3,272,442 more chars]
